# Supplementary material for: QTL mapping of agronomic traits in wheat using the UK Avalon × Cadenza reference mapping population grown in Kazakhstan
Source: PeerJ. 2021 Feb 18;9:e10733. doi: 10.7717/peerj.10733 (PMC7897413; doi:10.7717/peerj.10733)
Supplement: Supplemental Information 1 [file peerj-09-10733-s001.xlsx]

## Sheet: Table 1
Table S1: Genotype file of doubled haploid mapping population Avalonx Cadenza to consist of 3647 polymorphic DNA markers
Marker ID	Chr	Position	1	2	6	7	8	16	17	18	19	21	22	23	24	27	41	42	43	44	46	52	53	54	55	58	62	65	70	71	73	74	79	80	81	84	85	87	88	92	93	96	98	99	101	102	103	104	105
gdm033	1A	0	-	A	B	-	-	-	-	B	B	B	A	-	-	B	A	-	A	-	-	B	-	-	A	A	B	-	B	-	A	-	B	-	B	A	-	-	B	B	A	B	-	-	-	-	-	-	A
BS00024039	1A	2.5	A	A	B	B	A	B	B	B	B	B	A	A	B	B	A	A	-	B	B	B	B	B	A	B	B	B	B	A	A	A	B	A	B	A	B	A	B	B	A	B	A	A	A	A	B	A	A
BS00010488	1A	3	-	-	B	B	A	B	-	-	B	B	A	A	B	B	A	A	A	-	B	-	B	B	-	-	B	B	B	A	-	A	B	A	-	A	B	A	B	-	A	B	A	A	-	A	-	A	-
BS00064205	1A	3	A	A	-	-	A	B	B	B	B	B	A	A	B	B	A	A	-	B	B	B	B	B	A	B	B	B	B	A	A	A	B	A	B	A	B	A	B	B	A	B	A	A	A	A	-	A	A
psp2999	1A	11	A	A	B	B	A	-	-	B	B	B	A	-	-	B	A	-	A	-	-	B	-	-	A	B	B	-	B	-	A	-	B	-	A	A	-	-	B	B	A	B	-	-	-	-	-	-	A
Tagluten	1A	11	A	A	B	B	A	B	B	B	B	B	A	A	B	B	A	A	A	B	B	B	B	B	A	B	B	B	B	B	A	A	B	A	A	A	-	A	B	B	A	B	A	A	A	A	B	B	A
BS00023118	1A	12.8	A	A	-	-	A	B	B	B	B	B	-	A	B	B	A	A	A	B	B	B	-	B	A	B	B	B	B	A	A	A	B	A	A	A	B	A	B	B	A	B	A	A	A	-	B	B	-
gwm136	1A	13.5	A	A	A	B	A	B	B	B	-	B	A	A	B	B	A	A	A	-	B	B	-	B	A	B	B	B	B	A	A	A	B	A	A	A	-	A	B	B	A	B	A	A	A	A	B	B	-
wPt-4029	1A	14.1	-	A	B	B	A	B	B	B	A	B	A	A	B	B	A	-	A	B	B	B	B	B	A	B	B	B	B	-	A	A	B	A	A	A	-	A	B	B	A	B	-	A	A	A	B	-	A
wPt-9752	1A	17.5	-	A	-	B	A	-	B	-	A	-	A	A	-	B	A	A	A	B	B	B	A	B	A	B	-	-	B	A	A	A	B	A	A	A	-	A	B	B	A	B	A	A	A	A	B	-	-
BS00001635	1A	21.5	B	A	A	B	A	B	B	B	A	B	A	A	B	B	A	A	A	-	-	B	A	B	A	-	B	B	B	A	A	A	B	A	A	A	B	A	B	-	A	B	A	A	A	A	B	B	B
BS00004382	1A	21.5	B	A	A	B	A	B	B	B	A	B	A	A	B	B	A	A	A	-	-	B	A	B	A	-	B	B	B	A	A	A	B	A	A	A	B	A	B	-	A	B	A	-	A	A	B	B	B
BS00010039	1A	21.5	B	A	A	B	A	B	B	B	A	B	A	A	B	B	A	A	A	-	-	B	A	B	A	-	B	B	B	A	A	A	B	A	A	A	B	A	B	-	A	B	A	A	A	A	B	B	B
BS00010128	1A	21.5	B	A	A	B	A	B	B	B	A	B	A	A	B	B	A	A	A	-	B	B	A	B	A	-	B	B	B	A	A	A	B	A	A	A	B	A	B	-	A	B	A	A	A	A	B	B	-
BS00010267	1A	21.5	-	A	A	B	A	B	B	B	A	B	A	A	B	B	A	A	A	-	B	B	A	-	A	-	B	-	B	A	A	-	B	A	A	A	B	A	B	-	A	B	A	A	A	A	B	B	B
cfd15(2)	1A	21.5	B	A	A	B	A	B	B	B	A	B	A	A	B	B	A	A	A	B	B	B	A	B	A	B	B	B	B	A	A	A	B	A	A	A	-	A	B	B	A	B	-	-	-	-	-	-	-
BS00022361	1A	22.1	B	A	A	B	A	B	B	B	A	B	A	A	B	B	A	A	A	B	B	B	A	B	A	B	B	B	B	A	A	A	B	A	A	A	B	A	B	B	A	B	A	A	A	B	-	B	B
BS00022271	1A	25.1	B	A	-	-	A	B	B	B	A	B	-	A	B	A	A	A	A	B	B	B	A	B	A	B	B	B	B	A	A	-	-	A	A	A	B	A	B	-	A	B	A	-	A	B	B	B	B
BS00022285	1A	25.1	B	-	A	B	A	B	B	B	A	-	A	A	B	A	A	A	A	B	B	B	A	B	A	B	B	B	B	A	A	A	B	A	A	A	B	A	B	B	A	B	A	A	A	B	B	B	-
BS00022270	1A	25.7	B	A	A	B	A	B	B	B	A	B	A	A	B	A	A	A	A	B	B	B	A	-	A	B	B	B	B	A	A	A	B	A	A	A	B	A	B	B	A	B	A	A	A	B	B	-	A
BS00022701	1A	25.7	B	A	A	B	A	B	B	B	A	B	A	A	B	A	A	A	A	B	B	B	A	B	A	B	B	B	B	A	A	A	B	A	A	A	B	A	B	B	A	B	A	A	A	-	B	B	-
wmc336A	1A	26.9	B	A	A	B	A	B	B	B	A	B	A	A	B	A	A	A	A	B	B	B	A	B	A	B	B	B	B	A	A	-	B	A	A	A	-	A	B	B	-	B	A	A	A	B	B	B	B
BS00010054	1A	27.4	B	A	A	B	A	B	B	B	A	B	A	A	B	A	A	-	A	-	B	B	A	B	A	-	B	B	B	A	A	A	B	A	A	A	B	A	B	-	A	B	A	A	A	A	B	B	-
BS00012072	1A	27.4	B	A	A	B	A	B	B	B	A	B	A	A	B	A	A	A	A	-	B	B	A	B	A	-	B	B	B	A	A	A	B	A	A	A	B	A	B	-	A	B	A	A	A	-	B	B	B
BS00012226	1A	27.4	B	A	A	B	A	B	B	B	A	B	A	A	B	A	A	A	A	-	B	B	A	B	A	-	B	B	B	A	A	A	B	A	A	A	B	A	B	-	A	B	A	A	A	A	B	B	-
BS00103478	1A	27.4	B	A	A	B	A	B	B	B	A	B	A	A	B	A	A	A	-	B	B	B	A	B	A	B	B	B	B	A	A	A	B	A	A	A	B	-	B	B	A	B	A	A	A	A	B	B	A
BS00081682	1A	29.9	B	A	A	B	A	B	B	B	A	B	A	A	B	A	A	A	-	B	B	B	A	B	A	B	B	B	B	A	A	B	B	A	A	A	B	A	B	B	A	B	A	A	A	A	B	B	B
BS00022070	1A	31.5	B	A	A	B	A	B	B	B	A	B	-	A	B	A	A	A	A	B	B	B	A	B	A	B	B	B	B	-	A	B	B	A	A	A	B	A	B	B	A	B	A	A	A	B	B	B	A
BS00022934	1A	33.2	B	A	A	-	A	B	B	B	A	B	-	-	B	A	A	A	A	B	B	-	A	B	A	B	B	B	B	-	A	B	B	A	A	A	B	A	B	B	A	B	A	A	A	B	A	B	A
BS00003572	1A	33.7	B	A	A	B	A	B	B	B	A	B	A	A	B	A	A	A	A	-	-	B	A	B	A	-	B	-	B	A	A	B	B	A	A	A	B	A	B	-	A	B	A	A	A	A	A	B	A
BS00003761	1A	33.7	B	A	A	B	A	B	B	B	A	B	A	A	B	A	A	A	A	-	B	B	A	B	A	-	B	B	B	A	A	B	B	A	A	A	B	A	B	-	A	B	A	A	A	A	A	B	A
BS00012052	1A	33.7	B	A	A	B	A	B	B	B	A	B	A	A	B	A	A	A	A	-	B	B	A	B	A	-	B	B	B	A	A	B	B	A	A	A	B	A	B	-	A	B	A	A	A	A	A	B	A
BS00064536	1A	33.7	B	A	A	B	A	B	B	B	A	B	A	A	B	A	A	A	-	B	B	B	A	B	A	B	B	B	B	A	A	B	B	A	A	A	B	A	B	B	A	B	A	A	A	A	A	B	A
BS00021662	1A	36.1	B	A	A	B	A	B	B	B	A	B	A	A	B	A	A	A	A	-	B	-	A	B	A	-	B	B	B	-	-	B	B	A	A	A	B	A	-	-	A	B	A	A	A	A	A	B	-
BS00062578	1A	38.6	B	A	A	B	A	B	B	B	A	B	A	A	B	A	A	A	-	B	B	B	B	B	A	B	B	B	B	A	A	-	B	A	A	A	B	B	B	B	A	B	A	A	A	A	A	B	B
BS00070202	1A	38.6	B	A	A	B	A	B	B	B	A	B	A	A	B	A	A	A	-	B	B	B	B	B	A	B	B	B	B	A	A	B	B	A	A	A	B	B	B	B	A	B	A	A	A	A	A	B	B
BS00062579	1A	40.8	B	A	A	B	A	B	B	B	A	B	A	A	B	A	A	A	-	B	B	B	B	B	A	B	B	B	B	A	A	B	-	A	A	A	B	-	-	B	A	B	A	A	A	A	A	B	B
BS00078982	1A	46	B	A	A	-	A	B	B	B	A	B	A	A	B	A	A	A	-	B	B	B	B	B	A	B	B	B	B	A	A	B	A	A	A	A	B	-	A	B	A	-	A	A	A	B	A	B	-
BS00105601	1A	46	B	A	A	B	A	B	B	B	A	B	A	A	B	A	A	A	-	B	B	B	B	B	A	B	B	B	B	A	A	B	A	A	A	A	B	B	A	B	A	B	A	A	A	B	A	B	B
BS00011787	1A	46.6	-	A	A	B	A	B	B	-	A	B	A	A	B	A	A	A	A	-	B	B	B	B	A	-	B	B	B	A	A	B	A	A	A	A	B	B	B	-	A	B	A	A	A	B	A	B	B
BS00022391	1A	46.6	B	-	A	B	A	B	B	B	A	B	A	A	B	A	A	A	A	B	B	B	B	B	A	-	-	B	B	A	A	-	A	A	A	A	B	B	-	B	A	B	A	A	A	B	A	B	B
BS00009885	1A	49	B	A	A	B	A	B	B	B	A	B	A	A	B	A	A	A	A	-	B	B	B	B	A	-	-	B	B	A	A	B	A	A	A	A	B	B	B	-	A	B	A	B	A	B	A	B	B
BS00009926	1A	49	B	A	A	B	A	B	B	B	A	B	A	A	B	A	A	A	A	-	B	B	B	B	A	-	A	B	B	A	A	B	A	A	A	A	B	B	B	-	A	B	A	B	A	B	A	B	B
BS00003851	1A	55	-	B	A	B	A	B	B	B	A	B	A	A	A	A	B	A	A	-	-	B	B	B	A	-	A	B	B	A	A	B	A	A	A	A	B	B	B	-	B	B	A	B	A	B	A	B	A
BS00064197	1A	55	B	B	A	-	A	B	B	B	A	B	A	-	A	A	B	A	-	B	B	B	B	B	A	B	A	B	B	A	A	B	A	A	A	A	B	-	B	B	B	B	A	B	A	B	A	B	A
BS00003813	1A	55.6	B	B	A	B	A	B	B	B	A	B	A	A	A	A	B	A	-	B	B	B	B	B	A	B	A	B	B	A	A	B	-	A	A	A	B	-	B	B	B	B	A	B	A	B	A	B	A
BS00008865	1A	55.6	B	B	A	B	A	B	B	B	A	B	A	A	A	A	B	A	-	B	B	B	B	B	A	B	A	B	-	A	A	B	A	A	A	A	B	B	-	B	B	-	A	B	A	B	A	B	A
BS00009603	1A	55.6	B	B	A	B	A	B	B	B	A	B	A	A	A	A	B	A	A	-	-	B	B	B	-	-	A	-	B	A	A	B	A	A	A	A	B	B	B	-	B	B	A	B	A	B	A	B	A
BS00009866	1A	55.6	B	B	A	B	A	B	B	B	A	B	A	A	A	A	B	A	A	-	B	B	B	B	A	-	A	B	B	A	A	B	A	A	A	A	B	B	B	-	B	B	A	B	A	B	A	B	A
BS00010004	1A	55.6	B	B	A	B	A	B	B	B	A	B	A	A	A	A	B	A	A	-	-	B	B	B	A	-	A	B	B	A	A	B	A	A	A	A	B	B	B	-	B	B	A	B	A	B	-	B	A
BS00010452	1A	55.6	B	B	A	B	A	B	B	B	A	B	-	A	A	-	B	A	A	-	-	B	-	B	A	-	A	B	B	A	A	B	A	A	A	A	B	B	B	-	B	B	A	B	A	B	A	B	A
BS00010481	1A	55.6	-	B	A	B	A	B	B	B	A	B	A	A	A	A	B	A	A	-	-	B	B	B	A	-	A	B	B	A	A	B	A	A	A	A	B	B	B	-	B	B	A	B	A	B	A	B	A
BS00011128	1A	55.6	B	B	A	B	A	B	B	B	A	B	A	A	A	A	B	A	A	-	B	B	-	B	-	-	A	B	B	-	-	B	A	A	A	A	B	B	B	-	B	B	A	B	A	B	A	B	A
BS00011864	1A	55.6	B	B	A	B	A	B	B	-	A	B	A	A	A	A	B	A	A	-	B	B	B	B	A	-	A	B	B	A	A	B	A	A	A	A	B	B	B	-	B	B	A	B	A	B	A	-	A
BS00017812	1A	55.6	B	B	A	B	A	B	B	B	A	-	A	A	A	A	B	A	-	B	B	B	B	B	A	B	A	B	B	A	A	-	-	A	A	A	B	B	B	B	B	B	A	B	A	B	A	-	A
BS00021661	1A	55.6	B	B	A	B	A	B	B	B	A	B	-	-	A	A	B	A	A	-	B	B	B	B	A	-	A	B	B	A	A	B	A	A	A	A	B	B	B	-	B	B	A	B	A	B	A	B	A
BS00021730	1A	55.6	B	B	A	B	A	B	B	B	A	B	A	A	A	A	B	A	A	-	B	B	B	B	A	-	A	B	B	A	A	B	A	A	A	A	B	B	B	-	B	B	A	B	A	B	A	B	A
BS00021777	1A	55.6	B	B	A	B	A	B	B	B	A	B	A	A	A	A	B	A	A	-	B	B	B	B	A	-	A	B	B	A	A	B	A	A	A	A	B	B	B	-	B	B	A	B	A	B	A	B	A
BS00021863	1A	55.6	B	B	A	B	A	B	B	-	A	B	A	A	A	A	B	A	A	-	B	B	B	-	A	-	A	B	B	A	A	B	A	A	A	A	B	B	B	-	B	B	A	B	A	B	A	-	A
BS00022130	1A	55.6	B	-	-	B	-	B	-	B	A	-	-	A	A	A	B	A	A	B	B	B	B	B	A	B	A	B	B	A	A	B	A	A	A	A	B	B	B	B	B	B	A	B	A	B	A	-	A
BS00022144	1A	55.6	B	B	A	-	-	B	-	B	A	B	A	A	-	A	B	A	A	B	B	B	-	B	A	-	-	B	B	A	A	-	A	A	A	A	B	-	B	B	B	B	A	B	A	B	A	B	A
BS00022152	1A	55.6	B	B	A	B	A	B	B	B	A	B	A	A	A	A	B	A	-	B	B	-	-	B	A	B	A	B	-	A	A	B	A	A	A	A	B	B	B	B	B	B	A	B	A	B	A	B	A
BS00024062	1A	55.6	A	B	A	B	A	B	B	B	A	B	A	A	A	A	B	A	-	B	B	B	B	B	A	B	A	B	-	A	A	B	A	A	A	A	B	B	B	B	B	B	A	B	A	B	A	B	A
BS00031200	1A	55.6	B	-	A	B	A	B	B	B	A	B	-	A	A	A	B	A	-	B	B	B	B	B	A	B	A	B	B	A	A	B	-	A	A	A	B	B	B	B	B	B	-	B	A	B	-	B	-
BS00035720	1A	55.6	B	B	A	B	A	B	B	B	A	B	-	A	A	A	B	A	-	B	B	B	B	B	A	B	A	B	B	A	A	B	A	A	A	A	B	B	B	B	B	B	A	B	A	B	A	B	A
BS00037007	1A	55.6	B	B	A	-	A	B	B	B	A	B	A	A	A	A	B	A	-	B	B	B	B	B	A	B	A	B	B	A	A	B	A	A	A	A	B	B	B	B	B	B	A	B	A	B	A	-	A
BS00037255	1A	55.6	B	B	A	B	A	B	-	B	A	B	A	A	A	A	B	A	-	B	B	B	B	B	A	B	A	B	B	A	A	B	A	A	A	A	B	B	B	B	B	B	A	B	A	B	A	B	A
BS00044052	1A	55.6	B	B	A	B	A	B	B	B	A	B	A	A	A	A	B	A	-	B	B	B	B	B	-	B	-	B	-	A	A	B	-	A	A	A	B	-	-	B	B	-	A	-	A	B	A	B	A
BS00048118	1A	55.6	B	B	A	B	A	B	B	B	A	B	A	A	A	A	B	A	-	-	-	B	B	B	A	B	A	B	-	A	A	B	-	A	A	A	B	-	-	B	B	-	-	-	A	B	A	B	A
BS00048887	1A	55.6	B	B	A	B	A	B	B	B	A	B	A	A	A	A	B	A	-	B	B	B	B	B	A	B	A	B	B	A	A	B	A	A	A	A	B	B	B	B	B	B	A	B	A	B	A	B	A
BS00067536	1A	55.6	B	B	A	B	A	B	B	B	A	B	A	A	A	A	B	A	-	B	B	B	B	B	A	B	A	B	B	A	A	B	A	A	A	A	B	B	B	B	B	B	A	B	A	B	A	B	A
BS00072686	1A	55.6	B	B	A	B	A	B	B	B	A	B	A	A	A	A	B	A	-	B	-	B	B	B	A	B	A	B	B	A	A	B	-	A	A	A	B	B	B	B	-	-	A	B	A	B	A	B	A
BS00076668	1A	55.6	B	B	A	B	A	B	B	B	A	B	A	A	A	A	B	A	-	B	B	B	B	B	A	B	A	B	B	A	A	B	A	A	A	A	B	B	B	B	B	B	A	B	A	B	A	B	A
BS00077815	1A	55.6	-	B	A	B	A	B	B	B	A	B	A	A	A	A	B	A	-	B	B	B	-	B	A	B	A	B	B	A	A	B	A	A	A	A	B	B	B	B	B	B	A	B	A	B	A	B	A
BS00077978	1A	55.6	B	B	A	B	A	B	B	B	A	B	A	A	A	A	B	A	-	B	B	B	B	-	A	B	A	B	-	A	A	B	A	-	-	A	B	-	-	-	B	-	A	-	-	B	A	B	A
BS00080438	1A	55.6	B	B	A	B	A	B	B	B	A	B	A	A	A	A	B	A	-	B	B	B	B	B	A	B	A	B	B	A	A	B	A	A	A	A	B	B	B	B	B	B	A	B	A	B	A	B	A
BS00084428	1A	55.6	B	B	A	B	A	-	B	B	A	B	A	A	A	A	B	A	-	B	B	B	B	B	A	B	A	B	B	A	A	B	A	A	A	A	B	B	B	B	B	B	A	B	A	B	A	B	A
BS00088765	1A	55.6	B	B	A	B	A	B	B	B	A	B	A	A	A	A	B	A	-	B	B	B	B	B	A	B	A	B	B	A	A	B	A	A	A	A	B	-	B	B	B	B	A	B	A	B	A	B	A
BS00092112	1A	55.6	B	B	A	-	A	B	B	B	A	B	A	A	A	A	B	A	-	B	B	B	B	B	A	B	A	B	B	A	A	B	A	A	A	A	B	B	B	B	B	B	A	B	A	B	A	B	A
BS00092422	1A	55.6	B	B	A	B	A	B	B	B	A	B	A	A	A	A	B	A	-	B	B	B	B	B	A	B	A	B	B	A	A	-	A	A	A	-	B	-	B	B	B	B	A	B	A	B	A	B	A
BS00093150	1A	55.6	B	B	A	B	A	B	B	B	A	B	A	A	A	A	B	A	-	B	B	B	B	B	A	B	A	B	B	A	A	B	A	A	A	A	B	B	B	B	B	B	A	B	A	B	A	B	A
BS00095100	1A	55.6	B	B	A	B	A	B	B	B	A	-	A	A	A	A	B	A	-	B	B	B	B	B	A	B	A	B	B	A	A	B	-	-	A	A	B	-	B	B	B	B	A	B	A	B	A	B	A
BS00101116	1A	55.6	B	B	A	B	A	B	B	B	A	B	A	A	A	A	B	A	-	B	B	B	B	B	A	B	A	B	B	A	A	B	A	A	A	A	B	B	B	B	B	B	A	B	A	B	A	B	A
BS00102492	1A	55.6	B	B	A	-	A	B	B	B	A	B	A	-	A	A	B	A	-	B	B	B	B	B	A	B	A	-	B	A	A	B	A	A	A	A	B	B	B	B	B	B	A	B	A	B	A	B	A
wMAS000010_1RS:1AL	1A	55.6	-	-	A	B	A	B	B	B	A	B	A	A	-	A	B	A	-	B	B	B	B	B	A	B	A	B	B	A	A	B	-	A	A	A	B	B	B	B	B	B	A	B	A	-	A	B	A
BS00003758	1A	56.1	B	B	A	B	A	B	B	B	A	B	A	A	A	A	B	A	A	-	-	B	B	B	A	-	A	B	B	A	A	B	A	A	A	A	B	B	B	-	B	B	A	B	A	B	A	B	A
BS00009444	1A	56.1	B	B	A	B	A	B	B	B	A	B	A	A	A	A	B	A	A	-	-	B	B	B	A	-	A	B	B	A	A	B	A	A	A	A	B	B	B	-	B	B	A	B	A	B	A	B	A
BS00009495	1A	56.1	B	B	A	B	A	B	B	B	A	B	A	A	A	A	B	A	A	-	-	B	B	B	A	-	A	-	B	A	A	B	A	A	A	A	B	B	B	-	B	B	A	B	A	B	A	B	A
BS00010416	1A	56.1	B	B	A	B	A	B	B	-	A	B	A	A	A	A	B	A	A	-	B	B	B	B	A	-	A	B	B	A	A	B	A	A	A	A	B	B	B	-	B	B	A	B	A	B	A	B	A
BS00010595	1A	56.1	B	B	A	B	A	B	B	B	A	B	A	A	A	A	B	A	A	-	B	B	B	B	A	-	A	B	B	A	A	B	A	A	A	A	B	B	B	-	B	B	A	B	A	B	A	B	A
BS00010643	1A	56.1	B	B	A	B	A	B	B	B	A	B	A	A	A	A	B	A	A	-	B	B	B	B	A	-	A	B	B	A	A	B	A	A	A	A	B	B	B	-	B	B	A	B	A	B	A	B	A
BS00011286	1A	56.1	B	B	A	B	A	B	B	B	A	B	A	A	A	A	B	A	A	-	B	B	B	B	A	-	A	B	B	A	A	B	A	A	A	A	B	B	B	-	B	B	A	B	A	B	A	B	B
BS00011835	1A	56.1	B	B	A	B	A	B	B	B	A	B	A	A	A	A	B	A	A	-	B	B	B	B	A	-	A	B	B	A	A	B	A	A	A	A	B	B	B	-	B	B	A	B	A	B	A	B	A
BS00014906	1A	56.1	B	B	A	B	A	B	B	B	A	B	A	A	A	A	B	A	A	-	B	B	-	B	A	-	A	-	B	-	A	B	A	A	-	A	B	B	-	-	-	B	-	B	A	B	A	-	A
BS00021779	1A	56.1	B	B	A	B	A	B	B	-	A	B	-	-	A	A	B	A	A	-	B	B	B	B	A	-	A	B	B	-	A	B	A	A	A	A	B	B	B	-	B	B	A	B	A	B	A	B	-
BS00022149	1A	56.1	B	-	A	B	-	B	B	B	A	B	A	-	A	A	B	A	A	B	B	B	B	-	A	B	A	B	-	A	A	B	A	A	A	A	B	-	B	B	B	B	A	B	A	B	A	B	A
BS00022156	1A	56.1	B	B	A	A	A	B	B	B	A	B	-	-	A	A	B	A	A	-	B	-	B	B	A	B	A	B	B	-	A	B	A	A	A	A	B	B	B	B	B	B	A	B	A	B	A	B	A
BS00022167	1A	56.1	B	B	A	B	A	B	B	B	A	B	A	A	A	A	B	A	-	B	B	B	B	-	A	B	A	-	B	A	A	B	A	A	A	-	B	B	B	B	B	B	-	B	A	B	A	B	A
BS00022201	1A	56.1	B	-	A	B	-	B	B	B	A	B	-	A	A	A	-	A	-	-	B	-	-	-	A	B	-	B	-	A	A	B	A	A	A	A	B	-	B	B	B	-	A	B	A	B	A	B	-
BS00022207	1A	56.1	B	B	-	B	A	B	B	B	A	B	A	A	A	A	B	A	A	B	B	B	B	B	A	B	A	B	B	A	A	B	A	A	A	A	B	B	B	B	B	B	A	B	A	B	-	-	A
BS00022216	1A	56.1	B	B	A	B	A	B	B	B	A	B	A	A	A	-	-	A	A	-	B	B	B	B	A	B	A	B	B	A	A	B	A	A	A	-	B	B	B	B	B	B	A	B	A	B	A	B	A
BS00022217	1A	56.1	B	B	A	-	A	B	B	B	A	-	-	-	A	-	-	A	A	-	B	B	B	B	A	B	A	B	B	A	A	B	A	A	A	-	B	B	B	B	B	B	A	B	A	B	A	B	A
BS00022132	1A	56.7	B	B	A	B	-	B	B	B	A	B	A	A	A	A	B	A	A	B	-	B	B	B	A	B	A	B	B	A	A	B	A	A	A	A	B	B	B	B	B	B	A	B	A	B	A	-	A
gwm164	1A	58	B	B	A	B	A	B	B	B	A	B	A	A	A	A	B	A	A	B	B	B	B	B	A	B	A	B	B	A	A	B	A	A	A	A	-	B	B	B	B	B	A	B	A	B	A	B	B
gwm498	1A	58	B	B	A	B	A	B	B	-	A	B	A	A	A	A	B	A	A	B	B	B	B	B	A	B	A	B	B	A	A	B	A	A	-	A	-	B	B	B	B	-	A	B	A	B	A	B	B
psp3027	1A	58	B	B	A	B	A	B	B	B	A	B	A	A	A	A	B	A	A	B	B	B	B	B	A	B	A	B	B	A	A	B	A	A	A	A	-	B	B	B	B	B	A	B	A	B	A	B	B
wPt-6046	1A	58	-	B	A	B	A	B	B	B	A	B	A	A	A	A	B	A	A	B	B	B	B	B	A	B	A	-	B	A	A	B	A	A	A	A	-	B	B	B	B	B	A	B	A	B	A	B	B
I-10-2W1	1A	58.5	B	B	A	B	A	B	B	B	A	B	A	A	A	A	B	A	A	B	B	B	B	B	A	B	A	B	B	A	A	B	A	A	A	A	-	B	B	B	B	B	A	B	A	B	A	B	B
BS00000853	1A	62	B	B	A	B	A	B	B	B	A	B	A	A	A	A	B	A	A	-	-	B	B	B	B	-	A	-	B	A	A	-	A	A	A	A	B	B	B	-	B	B	A	B	A	B	B	B	B
BS00021864	1A	62	-	B	A	B	A	B	B	-	-	B	A	A	A	A	B	A	A	-	B	B	B	B	B	-	A	B	B	A	A	B	A	A	A	A	B	B	B	-	B	B	A	B	A	B	B	B	B
BS00022733	1A	62	B	B	A	B	A	B	B	B	A	B	A	A	A	A	B	A	A	B	B	-	B	B	B	B	A	B	B	A	A	B	A	A	A	-	B	B	B	B	B	B	A	B	A	B	B	B	-
BS00009559	1A	62.6	B	B	A	B	A	B	B	B	A	B	A	A	A	A	B	A	A	-	-	B	B	B	B	-	A	B	B	A	A	B	A	A	A	A	B	B	B	-	B	B	A	B	A	B	B	B	B
BS00010187	1A	62.6	-	B	A	B	A	B	B	B	A	B	A	A	A	A	B	A	A	-	B	B	B	B	B	-	A	B	B	A	A	B	A	A	A	A	B	B	B	-	B	B	A	B	A	B	B	B	B
BS00003656	1A	63.1	B	B	A	B	A	B	B	B	A	B	A	A	A	A	B	A	A	-	-	B	B	B	B	-	A	B	B	A	A	B	A	A	A	A	B	B	B	-	B	B	A	B	A	B	B	B	B
BS00003829	1A	63.1	B	B	A	B	A	B	B	B	A	B	A	A	A	A	B	A	A	-	-	B	B	B	B	-	A	B	B	A	A	B	A	A	A	A	B	B	B	-	B	B	A	B	A	B	B	B	B
BS00023462	1A	63.7	B	B	A	B	A	B	B	B	A	B	A	A	A	A	B	A	-	B	B	B	B	B	B	B	A	B	B	A	A	B	A	A	A	A	B	B	B	B	B	B	A	B	A	B	B	B	A
BS00021741	1A	64.2	-	B	A	B	A	B	B	B	A	B	A	A	A	A	B	A	A	-	B	B	A	B	B	-	A	B	B	A	A	B	A	A	A	A	B	B	B	-	B	B	A	B	A	B	B	B	B
BS00022172	1A	64.2	B	B	A	B	A	B	B	B	A	-	A	A	A	A	B	A	A	-	B	B	A	B	B	B	A	B	B	A	A	B	A	A	A	A	B	B	B	B	B	B	A	B	A	B	B	B	B
BS00022173	1A	64.2	B	B	A	B	A	B	B	B	A	B	A	A	A	A	B	A	A	-	B	B	A	B	B	B	A	B	B	-	A	B	A	A	A	A	B	B	B	B	B	B	A	B	A	B	B	B	-
BS00022220	1A	64.2	-	B	A	B	-	B	B	B	A	B	-	A	A	A	B	A	A	B	B	B	A	B	B	B	A	B	B	A	A	B	A	A	A	-	B	B	B	B	B	B	A	B	A	B	B	B	B
BS00039790	1A	64.2	B	B	A	B	A	B	B	B	A	B	A	A	A	A	B	A	-	B	B	B	A	B	B	B	A	B	B	A	A	B	A	A	A	A	B	B	B	B	B	B	A	B	A	B	B	B	B
BS00070435	1A	64.2	B	B	A	B	A	B	B	B	A	B	A	A	A	A	B	A	-	B	B	B	A	B	B	B	A	B	B	A	A	B	A	A	A	A	B	B	B	B	B	B	A	B	A	B	B	B	B
BS00077432	1A	64.2	B	B	A	B	A	B	B	B	A	B	A	A	A	A	B	A	-	B	B	B	A	B	B	B	A	B	B	A	A	B	A	A	A	A	B	-	B	B	B	B	A	B	A	B	B	B	A
BS00077433	1A	64.2	-	B	A	B	A	B	B	B	A	B	A	A	A	A	B	A	-	-	B	B	A	-	-	B	A	-	B	A	A	B	A	A	A	A	B	B	-	B	B	B	A	-	A	-	-	-	-
proGluA1	1A	64.2	B	B	A	B	A	B	B	B	A	B	A	A	A	A	B	A	A	B	B	B	A	B	B	B	A	B	B	A	A	B	A	A	A	A	-	B	B	B	B	B	A	B	A	B	B	B	B
Wmas000012_GluA1	1A	64.2	-	B	A	B	A	B	B	B	A	B	A	A	A	A	B	A	-	B	-	B	A	B	B	B	A	B	B	A	A	B	A	A	A	A	B	B	B	B	B	B	A	B	A	B	B	B	B
wMAS000013_GluA1	1A	64.2	B	B	A	B	A	B	B	B	A	B	A	A	A	A	B	A	-	B	B	B	A	B	B	B	A	B	B	A	A	B	A	A	A	A	B	B	B	B	B	B	A	B	A	B	B	B	B
wPt-9757	1A	64.2	B	B	-	B	A	B	B	B	A	B	A	A	A	A	B	A	A	B	B	B	A	B	B	B	A	B	B	A	A	B	A	A	A	A	-	B	B	B	B	B	A	B	A	-	B	B	B
BS00022158	1A	65.5	B	B	A	B	A	B	B	B	A	B	A	A	A	A	B	A	A	B	B	B	A	-	B	B	A	B	B	A	A	B	A	A	A	A	B	B	B	B	B	B	B	B	A	B	B	B	B
BS00003743	1A	69.7	B	B	A	B	A	B	B	B	A	B	A	A	A	A	B	A	A	-	-	B	A	B	B	-	A	B	A	A	A	B	A	A	A	A	B	A	B	-	B	A	B	B	A	B	B	B	A
BS00009459	1A	69.7	B	B	A	B	A	B	B	B	A	B	A	A	A	A	B	A	A	-	-	B	A	B	B	-	A	B	A	A	A	B	A	A	A	A	B	A	B	-	B	A	-	B	A	B	B	B	A
BS00009808	1A	69.7	B	B	A	B	A	B	B	B	A	B	A	A	A	A	B	A	A	-	B	B	A	B	B	-	A	B	A	A	A	B	A	A	A	A	B	A	B	-	B	A	B	B	A	B	B	B	A
BS00011146	1A	69.7	B	B	A	B	A	B	B	B	A	B	A	A	A	A	B	A	A	-	B	B	-	B	B	-	A	B	A	A	A	B	A	A	A	A	B	A	B	-	B	A	B	B	A	B	B	B	A
BS00039377	1A	69.7	B	B	A	B	-	B	B	B	A	B	A	-	A	A	B	A	-	B	B	B	A	B	B	B	A	B	A	A	A	B	A	A	A	A	B	-	B	B	B	A	B	B	A	B	-	B	A
BS00021764	1A	70.3	A	B	A	B	A	B	B	-	A	B	A	-	A	A	B	A	A	-	B	B	A	B	B	-	A	B	A	A	A	B	A	A	A	A	B	A	B	-	B	A	B	B	A	B	B	B	-
BS00009104	1A	73.9	A	B	A	B	A	B	B	B	A	B	A	A	A	A	B	A	-	B	B	B	A	B	B	B	A	B	A	A	A	B	A	A	A	A	B	A	B	B	B	A	B	B	A	B	B	B	A
BS00077900	1A	73.9	A	B	A	B	A	B	B	B	A	B	A	A	A	A	B	A	-	B	B	B	A	B	B	B	A	B	A	A	A	B	A	A	A	A	B	A	B	B	B	A	B	B	A	B	B	B	A
BS00009700	1A	74.5	A	B	A	B	A	B	B	B	A	B	A	A	A	A	B	A	A	-	-	B	A	B	B	-	A	B	A	A	-	B	A	A	A	A	B	A	B	-	B	A	B	B	A	B	B	B	-
BS00012042	1A	74.5	A	B	A	B	A	B	B	B	A	B	A	A	A	A	B	A	A	-	B	B	-	B	B	-	A	B	A	-	A	B	A	A	A	A	B	A	B	-	B	A	B	B	A	B	B	B	A
BS00021665	1A	74.5	A	B	A	B	A	B	B	B	A	B	A	A	A	A	B	A	A	-	B	B	A	B	B	-	A	B	A	A	A	B	A	A	A	A	B	A	B	-	B	A	B	B	A	B	B	-	A
BS00021758	1A	74.5	A	B	A	B	A	B	B	B	A	B	A	A	A	A	B	A	A	-	B	B	A	B	B	-	A	B	A	A	A	B	A	A	A	A	B	A	B	-	B	A	B	B	A	B	B	B	A
BS00047753	1A	74.5	A	B	A	B	A	B	B	B	A	B	A	A	A	A	B	A	-	B	B	B	A	B	B	B	A	B	A	A	A	B	A	A	A	A	B	A	B	B	B	A	B	B	A	B	B	B	A
BS00022061	1A	75	-	B	A	B	A	B	B	-	A	B	A	A	A	A	B	A	A	B	B	B	A	B	B	-	-	B	A	A	A	-	A	A	A	A	B	A	B	B	B	A	B	B	A	B	B	-	-
BS00022239	1A	75	-	B	-	B	A	B	B	B	A	-	A	A	A	A	B	A	-	B	B	B	A	B	B	-	A	B	A	A	A	B	A	A	A	A	B	A	B	B	B	A	B	B	A	B	B	B	A
BS00022396	1A	75	A	B	A	B	A	B	B	B	A	B	-	A	A	A	B	A	-	B	B	B	A	B	B	B	A	B	A	A	A	B	A	A	A	A	B	A	B	B	B	A	B	B	A	B	B	B	A
BS00022848	1A	75	A	B	A	B	A	B	B	B	A	B	A	A	-	A	-	A	A	-	-	B	-	B	-	-	-	B	-	A	A	B	A	A	A	A	B	A	B	B	B	A	B	B	A	B	B	B	A
BS00021759	1A	75.7	A	B	A	B	A	B	B	B	A	B	A	A	A	A	B	A	A	-	B	B	A	B	B	-	A	B	A	A	A	B	A	A	A	A	B	A	B	-	B	A	B	B	A	B	B	B	-
BS00003863	1A	77.9	A	B	A	B	A	B	B	B	A	B	A	A	A	A	B	A	A	-	-	B	A	B	B	-	A	B	A	-	A	B	A	A	A	A	B	A	B	-	B	A	B	B	A	B	B	B	B
BS00021797	1A	79	A	B	A	B	A	B	B	B	A	B	A	A	A	A	B	A	A	-	B	B	A	B	B	-	A	B	A	A	A	B	A	A	A	A	B	A	B	-	B	A	B	B	A	B	B	B	B
BS00021798	1A	79	A	B	A	-	A	B	B	B	A	B	A	A	A	A	B	A	A	-	B	B	A	B	B	-	A	B	A	A	A	B	A	A	A	A	B	A	B	-	B	A	B	B	A	B	B	B	B
BS00022356	1A	79	A	B	A	B	A	B	B	B	A	-	A	A	A	A	B	A	A	B	B	B	A	B	B	B	A	B	A	A	A	B	A	A	A	A	B	A	B	B	B	A	B	B	A	B	-	B	-
BS00068391	1A	79	-	-	A	B	A	B	B	B	A	B	A	A	A	A	B	A	-	B	B	B	A	B	B	B	A	B	A	A	A	B	A	A	A	A	B	A	B	B	B	A	B	B	A	B	B	B	B
BS00070580	1A	79	A	B	-	-	A	B	B	B	A	B	A	A	A	A	B	A	-	B	B	B	A	B	B	B	A	B	A	A	A	B	A	A	A	A	B	A	B	B	B	A	B	B	A	B	B	-	-
gwm99	1A	82	A	B	A	B	A	B	B	B	A	B	A	A	A	A	B	A	A	B	B	B	A	B	B	B	A	B	A	A	A	B	-	A	A	A	-	-	B	B	B	A	B	B	A	B	B	B	B
BS00021778	1A	83.4	A	B	A	B	A	B	B	B	A	-	-	-	A	A	B	-	A	-	B	B	A	B	-	-	-	B	A	A	A	-	A	-	A	A	B	-	B	-	B	-	B	B	A	B	B	B	B
wmc93	1A	94.3	B	B	A	B	A	B	B	B	A	B	A	A	A	A	B	A	A	B	B	B	A	B	B	B	A	B	A	A	A	A	A	A	A	A	-	B	B	B	B	B	A	A	-	-	-	-	-
BS00081680	1A	109.4	-	-	-	B	-	-	-	B	A	B	-	-	-	A	-	-	-	B	B	-	-	-	A	B	B	-	-	-	A	-	-	-	-	-	-	-	B	-	-	-	-	A	-	-	B	-	-
eAGGmCTA310	1A	109.4	-	-	-	-	A	-	-	B	A	B	A	-	-	A	A	-	A	-	-	B	-	-	A	B	B	-	B	-	A	-	B	-	A	A	-	-	B	A	A	B	-	-	-	-	-	-	B
eAACmCCC236	1B	0	B	A	A	B	B	-	-	A	B	B	B	-	-	A	A	-	A	-	-	B	-	-	A	A	B	-	A	-	A	-	A	-	B	A	-	-	A	B	B	A	-	-	-	-	-	-	A
gwm33A	1B	9.3	B	A	-	B	-	B	A	-	A	-	-	A	A	A	A	B	-	B	A	B	A	B	A	A	B	A	A	A	A	-	A	B	-	-	-	B	A	-	-	B	A	A	B	B	B	B	A
BS00010592	1B	20.7	B	A	B	B	A	B	B	A	A	B	B	A	A	A	A	B	A	-	-	B	A	B	A	-	B	A	A	A	B	B	A	B	A	A	B	B	A	-	B	B	A	A	A	B	B	B	A
BS00010791	1B	20.7	-	A	B	B	A	B	B	A	A	B	B	A	A	A	A	B	A	-	A	B	A	-	A	-	B	A	A	A	B	B	A	B	A	A	B	B	A	-	-	B	A	A	A	B	B	B	A
BS00076192	1B	20.7	B	A	B	B	A	B	B	A	A	B	B	A	A	A	A	B	-	-	-	B	A	B	A	A	B	A	-	-	B	B	-	-	A	A	B	-	-	B	B	-	-	-	A	B	B	B	A
BS00024046	1B	21.4	B	A	B	B	A	B	B	A	A	B	B	A	A	A	A	B	-	B	A	B	A	B	A	A	B	A	A	A	B	B	A	B	A	A	B	B	A	B	B	B	A	A	A	B	B	B	B
BS00050522	1B	21.9	B	A	B	B	A	B	B	A	A	B	B	A	A	A	A	B	-	B	A	B	-	B	A	A	B	A	A	A	B	B	A	B	A	A	B	B	-	B	B	B	-	A	A	B	B	B	-
BS00003831	1B	27.1	-	-	B	B	A	B	A	A	A	B	B	A	A	A	A	B	B	-	-	B	-	B	A	-	B	A	-	-	-	B	A	B	B	A	B	B	-	-	B	B	-	A	-	B	B	B	A
Wpt-2230	1B	27.1	B	A	B	B	A	B	A	A	A	B	B	A	A	A	A	B	B	B	A	B	A	B	A	A	B	A	A	A	A	B	A	B	B	A	-	B	A	B	B	B	A	A	A	B	B	B	A
BS00022310	1B	27.6	-	-	-	-	-	B	-	A	A	B	B	A	A	A	A	-	B	B	A	-	A	-	A	A	B	A	A	A	A	B	A	B	B	A	-	B	A	B	-	B	A	A	-	-	B	B	-
BS00022505	1B	27.6	B	-	B	-	-	B	A	A	A	B	B	A	A	A	A	B	B	B	A	B	A	B	A	A	B	A	A	A	A	B	A	B	B	A	B	B	A	B	B	B	A	A	A	B	B	B	B
gwm264	1B	27.6	B	A	B	B	A	B	A	A	A	B	B	A	A	A	A	B	B	B	A	B	A	B	A	A	B	A	A	A	A	B	A	B	B	A	-	B	A	B	B	B	A	A	A	B	B	B	A
BS00022702	1B	28.2	B	A	B	B	A	B	A	A	A	-	B	A	A	A	A	B	B	B	A	B	A	B	A	A	B	A	A	A	A	B	A	B	-	A	B	B	A	B	B	B	A	A	A	B	B	B	-
BS00022973	1B	28.2	B	A	B	B	A	-	A	A	A	B	B	A	A	A	A	B	B	B	A	B	A	B	A	A	B	A	A	A	A	B	A	B	B	A	B	B	A	B	B	B	A	A	A	-	B	B	B
BS00001634	1B	28.8	B	A	B	B	A	B	A	A	A	B	B	A	A	A	A	B	B	-	-	B	A	B	A	-	B	A	A	A	A	B	A	B	B	A	B	B	A	-	B	B	A	A	A	B	B	B	A
BS00003880	1B	28.8	B	A	B	B	A	B	A	A	A	B	B	A	A	A	A	B	B	-	-	B	A	B	A	-	B	A	A	A	A	B	A	B	B	A	B	B	A	-	B	B	A	A	A	B	B	B	-
BS00003911	1B	28.8	B	A	B	B	A	B	A	A	A	B	B	A	A	A	A	B	B	-	A	B	A	B	A	-	B	A	A	A	A	B	A	B	B	A	B	B	A	-	B	B	A	A	A	B	B	B	-
BS00003917	1B	28.8	B	A	B	B	A	B	A	A	A	B	B	A	A	A	A	B	B	-	-	B	A	B	A	-	B	-	A	A	A	B	A	B	B	A	B	B	A	-	B	B	A	A	A	B	B	B	A
BS00003930	1B	28.8	B	A	B	B	A	B	A	A	A	B	B	A	A	A	A	B	B	-	-	B	A	B	A	-	B	A	A	A	A	B	A	B	-	A	B	B	A	-	B	B	A	A	A	B	B	B	-
BS00010032	1B	28.8	B	A	B	B	A	B	A	A	A	B	B	A	A	A	A	B	B	-	B	B	A	B	A	-	B	A	A	A	A	B	A	B	B	A	B	B	A	-	B	B	A	A	A	B	B	B	A
BS00010076	1B	28.8	B	A	B	B	A	B	A	A	A	B	B	A	A	A	A	B	B	-	-	B	A	B	A	-	B	A	A	A	A	B	A	B	B	A	B	B	A	-	B	B	A	A	A	B	B	B	-
BS00010106	1B	28.8	B	A	B	B	A	B	A	A	A	B	B	A	A	A	A	B	B	-	A	B	A	B	A	-	B	A	A	A	A	B	A	B	B	A	B	B	A	-	B	B	A	A	A	B	B	B	A
BS00010508	1B	28.8	B	A	B	B	A	B	A	A	A	B	B	A	A	A	A	B	B	-	-	B	A	B	A	-	B	A	A	A	A	B	A	B	B	A	B	B	A	-	B	B	A	A	A	B	B	B	A
BS00010868	1B	28.8	B	A	B	B	A	B	A	A	A	B	B	A	A	A	A	B	B	-	A	B	A	B	A	-	B	A	A	-	A	B	A	B	B	A	B	B	A	-	B	B	A	A	A	B	B	B	B
BS00011608	1B	28.8	-	A	B	B	A	B	A	-	A	B	B	A	A	A	A	B	B	-	A	B	A	B	A	-	B	A	A	A	A	B	A	B	B	A	B	B	A	-	B	B	A	A	A	B	B	B	A
BS00011695	1B	28.8	B	A	B	B	A	B	A	A	A	B	B	A	A	A	A	B	B	-	A	B	A	B	A	-	B	A	A	A	A	B	A	B	B	A	B	B	A	-	B	B	A	A	A	B	B	-	B
BS00011961	1B	28.8	B	A	B	B	A	B	A	A	A	B	B	A	A	A	A	B	B	-	A	B	A	B	A	-	B	A	A	A	A	B	A	B	B	A	B	B	A	-	B	B	A	A	A	B	B	B	-
BS00022101	1B	28.8	B	-	B	B	A	B	A	-	A	B	B	A	A	A	A	B	B	B	A	B	A	B	A	A	B	A	A	A	A	B	A	B	B	A	B	B	A	B	B	B	A	A	A	B	B	B	A
BS00022102	1B	28.8	B	-	B	B	A	B	A	A	A	B	B	A	A	A	A	B	B	B	A	B	-	B	A	-	-	A	A	A	A	-	A	B	B	A	B	B	A	B	B	B	A	A	A	-	B	B	A
BS00022294	1B	28.8	B	A	-	B	A	B	A	A	A	B	B	A	A	A	A	B	B	B	A	B	A	B	A	A	B	A	A	A	A	B	A	B	B	A	B	B	A	B	-	B	A	A	-	B	B	B	A
BS00022650	1B	28.8	-	A	-	B	A	B	A	A	A	-	B	A	A	A	A	B	B	B	A	B	A	B	A	A	B	A	A	A	A	B	A	B	B	A	B	B	A	B	B	B	A	A	A	-	-	-	A
BS00023102	1B	28.8	B	A	B	B	A	B	-	A	A	B	B	A	A	A	A	B	B	B	A	B	A	B	A	A	B	A	A	A	A	B	A	B	B	A	B	B	A	-	B	B	A	A	A	-	B	B	A
BS00023177	1B	28.8	B	-	-	B	A	B	A	A	A	B	B	A	A	A	A	B	B	B	A	B	A	B	A	A	B	A	A	A	A	B	A	B	B	A	B	B	A	B	B	B	A	A	A	B	-	B	A
BS00030767	1B	28.8	-	A	-	B	A	B	A	A	A	B	B	A	A	A	A	B	-	B	A	B	A	B	A	A	B	A	A	A	A	B	A	B	B	A	B	-	A	B	B	B	A	A	A	B	B	B	-
BS00030768	1B	28.8	B	A	B	B	A	B	A	A	A	B	B	A	A	A	A	B	-	B	A	B	A	B	A	A	B	A	A	A	A	B	A	B	B	A	B	B	A	B	B	B	A	A	A	B	B	B	A
BS00073950	1B	28.8	B	A	B	B	A	B	A	A	A	B	B	A	A	A	A	B	-	B	A	B	A	B	A	A	B	A	A	A	A	B	A	B	B	A	B	-	A	B	B	-	A	A	A	B	B	B	-
BS00080214	1B	28.8	B	A	-	B	A	B	A	A	A	B	B	A	A	A	A	B	-	B	A	B	A	B	A	A	B	A	A	A	A	B	A	B	-	A	B	B	A	B	B	B	A	-	A	B	B	B	A
BS00082143	1B	28.8	B	A	B	B	A	B	A	A	A	B	B	A	A	A	A	B	-	B	A	B	A	B	A	A	B	A	A	A	A	B	A	B	B	A	B	B	A	B	B	B	A	A	A	B	B	B	-
BS00109639	1B	28.8	B	A	B	B	A	B	A	A	A	B	B	-	A	A	A	B	-	B	A	B	A	B	A	A	B	A	A	A	A	B	A	B	B	A	B	B	A	B	B	B	A	A	A	B	-	-	B
ProtSLeo.tAglAp	1B	28.8	B	A	B	B	A	B	A	A	A	B	B	A	A	A	A	B	B	B	A	B	A	B	A	A	B	A	A	A	A	B	A	B	B	A	-	B	A	B	B	B	A	A	A	B	B	B	A
TaglgApG	1B	28.8	B	A	B	B	A	B	A	A	A	B	B	A	A	A	A	B	B	B	A	B	A	B	A	A	B	A	A	A	A	B	A	B	B	A	-	B	A	B	B	B	A	A	A	B	B	B	A
BS00003684	1B	30.6	B	A	B	B	A	B	A	A	A	B	B	A	A	A	A	B	B	-	-	B	A	A	A	-	B	-	A	A	A	B	A	-	B	A	B	B	A	-	B	B	A	A	A	B	B	B	A
Wpt-5562	1B	33	B	A	B	B	A	B	A	A	A	B	B	A	A	A	B	B	B	B	A	B	A	A	A	B	-	A	A	A	A	B	A	B	B	A	-	B	A	B	A	B	A	A	A	A	B	B	A
BS00011641	1B	33.6	B	A	B	B	A	B	A	A	A	B	B	A	A	A	B	B	B	-	A	B	A	A	A	-	B	A	A	A	A	B	A	B	B	A	B	B	A	-	A	B	A	A	A	-	B	B	-
BS00046292	1B	33.6	B	A	B	B	A	B	A	A	A	B	B	A	A	A	B	B	-	B	A	B	A	A	A	B	B	A	A	A	A	B	A	B	B	A	B	-	-	B	A	B	A	A	A	A	B	B	B
BS00022030	1B	35.3	B	A	B	B	A	B	A	A	A	B	B	A	A	A	B	B	B	B	A	B	A	A	A	B	B	A	A	A	A	B	A	B	B	A	B	B	A	B	A	B	A	A	A	B	B	B	-
BS00022135	1B	36.4	B	A	-	B	A	B	A	A	A	B	B	A	A	A	B	B	B	B	A	B	-	-	A	B	B	A	A	A	A	B	A	B	-	A	B	B	A	B	A	B	A	A	A	B	-	B	A
BS00024037	1B	46.7	A	A	B	B	A	B	A	A	A	B	B	A	A	A	B	B	-	B	A	A	B	A	A	B	B	A	A	A	A	B	A	B	B	B	B	B	A	B	A	B	A	-	A	A	B	B	A
BS00099829	1B	46.7	A	-	B	B	A	B	A	A	A	B	B	A	A	A	B	B	-	B	A	A	B	A	A	B	B	A	A	A	A	B	A	B	B	B	B	B	A	B	A	B	A	A	A	A	-	B	A
BS00067290	1B	50.5	A	A	B	B	A	B	A	B	A	B	B	A	A	A	B	B	-	B	A	A	B	A	A	B	B	A	A	A	A	B	A	B	B	B	B	B	A	B	A	B	-	B	A	A	B	B	B
BS00003619	1B	51.7	A	A	B	B	A	B	A	B	A	B	B	A	A	A	B	B	B	-	A	A	B	A	A	-	B	A	A	A	A	B	A	B	B	B	B	B	A	-	A	B	A	A	A	A	B	B	A
BS00003839	1B	51.7	A	A	B	B	A	B	A	B	A	B	B	A	A	A	B	B	B	-	A	A	B	A	A	-	B	A	A	A	A	B	A	B	B	B	B	B	A	-	A	B	A	A	A	A	B	B	A
BS00009381	1B	51.7	A	A	B	B	A	B	A	B	A	B	B	A	A	A	B	B	B	-	A	A	B	A	A	-	B	A	A	A	A	B	A	B	B	B	B	B	A	-	A	B	A	A	A	A	B	B	A
BS00014413	1B	51.7	A	A	B	B	A	B	A	B	A	B	B	A	A	A	B	B	B	-	-	A	B	A	A	-	B	-	A	A	A	-	A	B	B	B	B	B	A	-	A	B	A	A	A	A	B	B	A
BS00021052	1B	51.7	A	A	B	B	A	B	A	B	A	B	B	A	A	A	B	B	B	-	A	A	B	A	A	-	B	A	A	A	A	B	A	B	B	B	B	B	A	-	A	B	A	A	A	A	B	B	A
BS00022281	1B	51.7	A	A	B	B	A	B	A	-	A	-	B	-	A	A	B	B	B	B	A	A	B	-	A	B	B	A	A	A	A	B	A	B	B	B	B	B	A	B	A	B	A	-	A	-	B	-	-
BS00026143	1B	51.7	A	-	B	-	A	B	A	B	A	B	B	A	A	A	B	B	-	B	A	A	B	A	A	B	B	A	A	A	A	B	A	B	B	B	B	B	A	B	A	B	A	A	A	A	B	B	A
BS00003822	1B	53	A	B	B	B	A	B	A	B	A	B	B	A	-	A	B	B	B	-	-	A	-	A	A	-	B	A	A	A	A	B	A	B	A	B	B	B	A	-	A	B	A	A	A	A	B	B	A
BS00009827	1B	53	-	-	B	B	A	B	-	-	A	-	B	A	A	-	B	B	B	-	A	-	B	-	-	-	B	A	-	A	-	-	A	B	A	B	B	B	A	-	A	B	A	A	-	A	B	B	-
BS00033467	1B	53	A	B	B	B	A	B	A	B	A	B	B	A	A	A	B	B	-	B	A	A	B	A	A	B	B	A	A	A	A	B	A	B	A	B	B	-	A	B	A	B	A	A	A	A	B	B	A
BS00087906	1B	53	-	B	B	B	A	B	A	B	A	B	B	A	A	A	B	B	-	B	A	A	B	A	A	B	B	A	A	A	A	B	A	B	A	B	B	B	A	B	A	B	A	A	A	A	B	B	A
BS00095478	1B	53	A	B	B	B	A	B	A	B	A	B	B	A	A	A	B	B	-	B	A	A	B	A	A	B	B	A	A	A	A	B	-	B	A	B	B	-	A	B	A	B	A	A	A	A	B	B	A
BS00010246	1B	53.5	A	B	B	B	A	B	A	-	A	B	B	A	A	A	B	A	B	-	A	A	B	A	A	-	B	A	A	A	A	B	A	B	A	B	B	B	A	-	A	B	A	A	A	A	B	B	-
BS00010992	1B	53.5	A	B	B	B	A	B	A	B	A	B	B	A	A	A	B	A	B	-	A	A	B	A	A	-	B	A	A	A	A	B	A	B	A	B	B	B	A	-	A	B	A	A	A	A	B	B	A
BS00013901	1B	53.5	A	B	B	B	A	B	A	B	A	B	B	A	A	A	B	A	B	-	A	A	B	A	A	-	B	A	A	A	A	B	A	B	A	B	B	B	A	-	A	B	A	A	A	A	B	B	A
BS00024098	1B	53.5	A	B	B	B	A	B	A	B	A	B	B	A	A	A	B	A	-	B	A	A	B	A	A	B	B	A	A	A	A	B	A	B	A	B	B	B	A	B	A	B	A	A	A	A	B	B	A
BS00030989	1B	53.5	A	B	-	B	A	B	A	B	A	B	B	A	A	A	B	A	-	B	A	A	B	A	A	B	B	A	A	A	A	B	A	B	A	B	B	B	A	B	A	B	A	A	A	A	B	-	-
BS00068779	1B	53.5	A	B	B	B	A	B	A	B	A	B	B	A	A	A	B	A	-	B	A	A	B	A	A	B	B	A	A	A	A	B	A	B	A	B	B	B	A	B	A	B	A	A	A	A	B	B	A
BS00010875	1B	54.1	A	B	B	B	A	B	A	B	A	B	B	A	A	A	B	A	B	-	A	A	B	A	A	-	B	A	A	-	A	B	A	B	A	B	B	B	-	-	A	B	-	A	A	A	B	-	A
BS00011379	1B	54.1	A	B	B	B	A	B	A	B	A	B	B	A	A	A	B	A	B	-	A	A	B	A	A	-	B	A	A	A	A	B	A	B	A	B	B	B	A	-	A	B	A	A	A	A	B	B	A
BS00035690	1B	54.1	A	B	B	B	A	B	-	B	A	B	B	A	A	A	B	A	-	B	A	A	B	A	A	B	B	A	A	A	A	B	A	B	A	B	B	-	A	B	-	B	A	A	A	A	B	B	A
BS00011008	1B	57	A	B	B	B	A	B	A	B	A	B	B	A	A	A	B	A	B	-	A	A	B	A	A	-	B	A	A	A	A	B	A	B	A	B	B	B	A	-	A	B	A	A	A	A	B	B	A
BS00017597	1B	57	-	-	-	B	-	-	-	-	A	B	-	-	-	A	B	A	B	-	-	A	-	-	-	-	-	-	-	-	-	-	-	-	-	B	-	B	-	-	-	-	-	-	A	A	B	-	-
BS00041010	1B	57	A	B	B	B	A	B	A	B	A	-	-	A	A	A	B	A	-	B	A	A	B	A	A	B	B	A	A	A	A	B	A	B	A	B	B	B	A	B	A	B	A	A	A	A	B	B	A
BS00047907	1B	57	A	B	B	B	A	B	A	B	A	B	B	A	A	A	B	A	-	B	A	A	B	A	A	B	B	A	A	A	A	B	A	B	A	B	B	B	A	B	A	B	A	A	A	A	B	B	A
BS00070139	1B	57	A	B	B	-	A	B	A	B	A	B	B	A	A	A	B	A	-	B	A	A	B	A	A	B	B	A	A	A	A	B	A	B	A	B	B	B	A	B	A	B	A	A	A	A	B	B	A
BS00071083	1B	57	A	B	B	B	A	B	A	B	A	B	-	A	A	A	B	A	-	B	A	A	B	A	A	B	B	A	A	A	A	B	A	B	A	B	B	B	A	B	A	B	A	A	A	A	B	B	A
BS00075663	1B	57	A	B	B	B	A	B	A	B	A	B	B	A	A	A	B	A	-	B	A	A	B	A	A	B	B	A	A	A	A	B	A	B	A	B	B	-	A	B	A	-	A	-	A	A	B	B	A
eACTmCAC320	1B	57	A	B	B	-	-	-	-	B	A	B	B	-	-	A	B	-	B	-	-	A	-	-	A	B	B	-	A	-	A	-	A	-	A	B	-	-	A	B	A	B	-	-	-	-	-	-	A
BS00037306	1B	58.2	A	B	B	B	A	B	A	B	A	B	B	A	A	A	B	A	-	B	A	A	B	A	A	B	B	A	-	-	A	B	-	B	A	B	B	-	B	B	A	-	A	A	A	A	B	B	A
BS00043575	1B	58.2	A	B	B	B	A	B	A	B	A	B	B	A	A	A	B	A	-	B	A	A	B	A	A	B	B	A	A	A	A	B	A	B	A	B	B	-	A	B	A	A	A	A	A	A	B	B	A
BS00045316	1B	58.2	A	B	B	B	A	B	A	B	-	B	B	A	A	A	B	A	-	B	A	A	B	-	A	B	-	A	A	A	A	-	A	-	A	-	B	-	A	B	A	A	A	A	A	A	B	B	A
BS00067726	1B	58.2	A	B	B	B	A	B	A	B	A	B	B	A	A	A	B	A	-	B	A	A	B	A	A	B	B	A	-	A	A	B	-	B	A	B	B	-	-	B	A	-	A	A	A	A	B	B	A
BS00076696	1B	58.2	A	B	B	B	A	B	A	B	A	B	B	A	A	A	B	A	-	B	A	A	B	A	A	B	B	A	A	A	A	B	A	B	A	B	B	B	-	B	A	-	-	A	A	A	B	B	-
BS00009502	1B	58.8	A	B	B	B	A	B	A	B	A	B	B	A	A	A	B	A	B	-	A	A	B	A	A	-	B	A	A	A	A	B	A	B	A	B	B	B	A	-	A	B	A	A	A	A	B	B	A
BS00009547	1B	58.8	A	B	B	B	A	B	A	B	A	B	B	A	A	A	B	A	B	-	-	A	B	A	A	-	B	A	A	A	A	B	A	B	A	B	B	B	A	-	A	B	A	A	A	A	B	B	A
BS00009952	1B	58.8	A	B	B	B	A	B	A	B	A	B	B	A	A	A	B	A	B	-	-	A	B	A	A	-	B	A	A	A	A	B	A	B	A	B	B	B	A	-	A	B	A	A	A	A	B	B	A
BS00010549	1B	58.8	A	B	B	B	A	B	A	B	A	B	B	A	A	A	B	A	B	-	A	A	B	A	A	-	B	A	A	A	A	B	A	B	A	B	B	B	A	-	A	B	A	A	A	A	B	B	A
BS00011104	1B	58.8	A	B	B	B	A	B	A	B	A	B	B	A	A	A	B	A	B	-	A	A	B	A	A	-	B	A	A	A	A	B	A	B	A	B	-	B	A	-	A	B	A	A	A	-	B	B	A
BS00011159	1B	58.8	A	B	B	B	A	B	A	B	A	B	B	A	A	A	B	A	B	-	A	A	B	A	A	-	B	A	A	A	A	B	A	B	A	B	B	B	A	-	A	B	A	A	A	A	B	B	A
BS00011222	1B	58.8	-	B	B	B	A	B	A	B	A	B	B	A	A	A	B	A	B	-	A	A	B	A	A	-	B	A	A	A	A	B	A	B	A	B	B	B	A	-	A	B	A	A	A	A	B	B	A
BS00011333	1B	58.8	-	B	B	B	A	B	A	B	A	B	B	A	A	A	B	A	B	-	A	A	B	A	A	-	B	A	A	A	A	B	A	B	A	B	B	B	A	-	A	B	A	A	A	A	B	B	-
BS00011450	1B	58.8	A	B	B	B	A	B	-	B	A	B	B	A	A	A	B	A	B	-	A	A	B	A	A	-	B	A	A	A	A	B	A	B	A	B	B	B	A	-	A	B	A	A	A	A	B	B	A
BS00011468	1B	58.8	A	B	B	B	A	B	A	B	A	B	B	A	A	A	B	A	B	-	A	A	-	A	A	-	B	A	A	A	A	B	A	B	A	B	B	B	-	-	A	B	A	A	A	A	B	B	A
BS00011500	1B	58.8	A	B	B	B	A	B	A	B	A	B	B	A	A	A	B	A	B	-	A	A	B	A	A	-	B	A	A	A	A	B	A	B	A	B	B	B	A	-	A	B	A	A	A	A	B	-	A
BS00021900	1B	58.8	A	B	B	B	A	B	A	B	A	B	B	A	A	A	B	A	B	-	A	A	B	A	A	-	B	A	A	A	A	B	A	B	A	B	B	B	A	-	A	B	A	A	A	A	B	B	A
BS00031831	1B	58.8	A	B	B	-	A	B	A	B	A	B	B	A	A	A	B	A	-	B	A	A	B	A	A	B	B	A	A	A	A	B	A	B	A	B	B	B	A	B	A	B	A	A	A	A	B	-	-
BS00038778	1B	58.8	A	-	B	-	-	B	A	B	A	B	B	A	A	A	B	A	-	B	A	A	B	A	A	B	B	A	A	A	A	B	A	B	A	B	B	B	A	B	A	B	A	A	A	A	-	-	A
BS00042132	1B	58.8	A	B	B	B	A	B	A	B	A	B	B	A	A	A	B	A	-	B	A	A	B	A	A	B	B	A	A	A	A	B	A	B	A	B	B	B	A	B	A	B	A	A	A	A	B	B	A
BS00061923	1B	58.8	-	B	B	B	A	-	A	B	A	-	B	A	A	A	B	A	-	B	A	A	B	A	A	B	B	A	A	A	A	B	A	B	A	B	B	B	A	B	A	B	A	A	A	A	B	B	A
BS00063113	1B	58.8	A	B	B	B	A	B	A	B	A	B	B	A	A	A	B	A	-	-	A	A	B	-	A	B	-	A	-	A	A	B	A	B	A	-	B	-	A	B	A	B	A	-	-	A	B	B	A
BS00064231	1B	58.8	A	B	B	B	A	B	A	B	A	-	B	A	A	A	B	A	-	B	A	A	B	B	A	B	B	A	B	A	A	B	-	B	A	B	B	B	B	B	A	B	-	-	A	A	B	B	A
BS00078997	1B	58.8	A	B	B	B	A	B	A	B	A	B	B	A	A	A	B	A	-	-	-	A	B	-	A	B	-	A	-	A	A	B	-	B	A	B	B	-	-	B	-	B	A	A	A	A	B	B	A
BS00080822	1B	58.8	A	B	B	B	A	B	A	B	A	B	B	A	A	A	B	A	-	B	A	A	B	A	A	B	B	A	A	A	A	B	A	B	A	B	B	-	A	B	A	B	A	A	A	A	B	B	A
BS00088761	1B	58.8	A	B	B	B	A	B	A	B	A	B	B	A	A	A	B	A	-	B	A	A	B	-	A	B	B	A	A	A	A	B	A	B	A	B	B	B	A	B	A	B	A	A	A	A	B	B	A
UGA152mid	1B	60.2	B	B	A	B	-	B	A	-	A	B	B	A	A	-	B	A	A	B	A	A	B	A	A	-	B	A	A	-	A	-	A	B	A	B	-	B	A	B	-	-	A	A	A	A	B	-	A
BS00003567	1B	61.7	A	B	B	B	A	B	A	B	A	B	B	A	A	A	B	A	B	-	-	A	B	A	A	-	B	A	A	-	A	B	A	B	A	B	B	B	A	-	A	B	A	A	A	A	B	B	A
BS00003575	1B	61.7	A	B	B	B	A	B	A	B	A	B	B	A	A	A	B	A	B	-	-	A	B	A	A	-	B	A	A	A	A	B	A	B	A	B	B	B	A	-	A	B	A	A	A	A	B	B	A
BS00003600	1B	61.7	A	B	B	B	A	B	A	B	A	B	B	A	A	A	B	A	B	-	A	A	B	A	A	-	B	A	A	A	A	B	A	B	A	B	B	B	A	-	A	B	A	A	A	A	B	B	A
BS00003677	1B	61.7	A	B	B	B	A	B	A	B	A	B	B	A	A	A	B	A	B	-	A	A	B	A	A	-	B	A	A	A	A	B	A	B	A	B	B	B	A	-	A	B	A	A	A	A	B	-	A
BS00003844	1B	61.7	A	B	B	B	A	B	A	B	A	B	B	A	A	A	B	A	B	-	A	A	B	A	A	-	B	A	A	A	A	B	A	B	A	B	B	B	A	-	A	B	A	A	A	A	B	B	A
BS00009921	1B	61.7	A	B	B	B	A	B	A	B	A	B	B	A	A	A	B	A	B	-	A	A	B	A	A	-	B	A	A	A	A	B	A	B	A	B	B	B	A	-	A	B	A	A	A	A	B	B	A
BS00009977	1B	61.7	A	B	B	B	A	B	A	B	A	B	B	A	A	A	B	A	B	-	-	A	B	A	A	-	B	A	A	A	A	B	A	B	A	B	B	B	A	-	A	B	A	A	A	A	B	B	A
BS00009983	1B	61.7	A	B	B	B	A	B	A	B	A	B	B	A	A	A	B	A	B	-	A	A	B	-	-	-	B	A	A	A	-	B	A	B	A	B	B	B	A	-	A	B	-	A	A	A	B	B	A
BS00010253	1B	61.7	A	B	B	B	A	B	A	-	-	B	B	A	A	A	B	A	B	-	A	A	B	-	A	-	B	A	A	A	A	B	A	B	A	B	B	B	A	-	A	B	A	A	A	A	B	B	A
BS00011462	1B	61.7	A	B	B	B	A	B	A	B	A	B	B	A	A	A	B	A	B	-	A	A	B	A	A	-	B	A	A	A	A	B	A	B	A	B	B	B	A	-	A	B	A	A	A	A	B	B	B
BS00011463	1B	61.7	A	B	B	B	A	B	A	B	A	B	B	A	A	A	B	A	B	-	A	A	B	A	A	-	B	A	A	A	A	B	A	B	A	B	B	B	A	-	A	B	A	A	A	A	B	B	A
BS00011712	1B	61.7	A	B	B	B	A	B	A	B	A	B	B	A	A	A	B	A	B	-	A	A	B	A	A	-	B	A	A	A	A	B	A	B	A	B	B	B	A	-	A	B	A	A	A	A	B	B	A
BS00011745	1B	61.7	A	B	B	B	A	B	A	B	A	B	B	A	A	A	B	A	B	-	A	A	B	-	A	-	B	A	A	A	A	B	A	B	A	B	B	B	A	-	A	B	A	A	A	A	B	B	A
BS00012062	1B	61.7	A	B	B	B	A	B	A	B	A	B	B	A	A	A	B	A	B	-	A	A	B	A	A	-	B	A	A	A	A	B	A	B	A	B	B	B	A	-	A	B	A	A	A	A	B	B	A
BS00012079	1B	61.7	A	B	B	B	A	B	A	B	A	B	B	A	A	A	B	A	B	-	A	A	B	A	A	-	B	A	A	A	A	B	A	B	A	B	B	B	A	-	A	B	A	A	A	A	B	B	A
BS00013824	1B	61.7	-	-	-	B	A	B	A	-	-	B	B	A	-	A	B	A	B	-	-	A	-	A	-	-	B	A	A	-	A	-	-	B	A	B	B	B	B	-	-	B	A	A	A	A	B	B	-
BS00018461	1B	61.7	A	B	B	B	A	B	A	B	A	B	B	A	A	-	B	-	-	B	A	A	B	-	A	B	-	A	-	A	A	B	A	-	A	B	B	-	A	B	A	-	A	-	-	A	B	B	A
BS00018526	1B	61.7	A	-	B	B	A	B	A	-	A	B	B	A	A	A	B	A	B	-	A	A	B	-	-	-	B	A	-	A	A	B	A	B	A	B	-	B	-	-	A	B	A	A	A	A	B	B	-
BS00021866	1B	61.7	-	B	B	B	A	B	A	-	-	-	B	A	A	A	B	A	B	-	A	A	-	-	A	-	B	A	A	-	A	B	A	B	A	B	B	B	-	-	A	B	A	A	A	A	B	B	-
BS00029345	1B	61.7	A	B	B	B	A	B	A	B	A	B	B	A	A	A	B	A	-	B	A	A	B	A	A	B	B	A	A	A	A	B	A	B	A	B	B	B	A	B	A	B	A	A	A	A	B	B	A
BS00036121	1B	61.7	A	B	B	B	A	B	A	B	A	B	B	A	A	A	B	A	-	B	A	A	B	A	A	B	B	A	A	A	A	B	A	B	A	B	B	-	-	B	A	B	A	A	-	A	B	B	A
BS00038929	1B	61.7	A	B	-	B	A	B	A	B	A	B	B	A	A	A	B	A	-	B	A	A	B	A	A	B	B	-	-	A	A	B	-	B	A	B	B	-	A	B	A	-	A	A	A	A	B	B	A
BS00050457	1B	61.7	A	B	B	B	-	B	A	B	A	B	B	A	A	A	B	A	-	B	A	A	B	A	A	B	B	A	A	A	A	B	A	B	A	B	B	-	-	B	A	-	A	A	A	A	B	B	A
BS00062441	1B	61.7	A	B	B	B	-	B	A	B	A	B	B	A	A	A	B	A	-	B	A	A	B	A	A	B	B	A	A	A	A	B	A	B	A	B	B	B	A	B	A	B	A	A	A	A	B	B	A
BS00064579	1B	61.7	A	B	B	B	A	B	A	B	A	B	B	A	A	A	B	A	-	-	-	A	B	A	A	B	B	A	-	-	A	B	-	-	-	B	B	-	-	B	A	-	-	-	A	A	B	B	A
BS00065140	1B	61.7	A	B	B	B	A	B	A	B	A	B	B	A	A	A	B	A	-	B	A	A	B	A	A	B	B	A	A	A	A	B	A	B	A	B	B	B	A	B	A	B	A	A	A	A	B	B	A
BS00066165	1B	61.7	A	B	B	B	A	B	A	B	A	B	B	A	A	A	B	A	-	B	A	A	B	A	A	B	B	A	A	A	A	B	A	B	A	B	B	B	A	B	A	B	A	A	A	A	B	B	A
BS00067743	1B	61.7	A	B	B	-	A	B	A	B	A	B	B	A	A	A	B	A	-	B	A	A	B	A	A	B	B	A	A	A	A	B	A	B	A	B	B	B	A	B	A	B	A	A	-	A	B	B	A
BS00071082	1B	61.7	A	B	B	B	-	B	A	B	A	B	B	A	A	A	B	A	-	B	A	A	B	A	A	B	B	A	A	A	A	B	A	B	A	B	B	B	A	B	A	B	A	A	A	A	B	B	A
BS00073094	1B	61.7	A	B	B	B	A	B	A	B	A	B	B	A	A	A	B	A	-	B	A	A	B	A	A	B	B	A	A	A	A	B	A	B	A	B	B	B	A	B	A	B	A	A	A	A	B	B	A
BS00090553	1B	61.7	A	B	B	B	A	B	A	B	A	B	B	A	A	A	B	A	-	B	A	A	B	A	A	B	B	A	A	A	A	B	A	B	A	B	B	B	A	B	A	B	A	A	A	A	B	B	A
BS00091191	1B	61.7	A	B	B	B	A	B	A	B	A	B	B	A	A	A	B	A	-	B	A	A	B	A	A	B	B	A	A	A	-	B	A	B	A	B	B	-	A	B	A	B	A	A	A	A	B	B	-
BS00091640	1B	61.7	A	B	B	B	A	B	A	B	A	B	B	A	A	A	B	A	-	B	A	A	B	A	A	B	B	A	A	A	A	B	A	B	A	B	B	-	A	B	A	B	A	A	A	A	B	B	A
BS00094499	1B	61.7	A	B	B	B	A	B	A	B	A	B	B	-	A	A	B	A	-	B	A	A	B	A	A	B	B	-	A	A	A	-	-	B	A	-	B	-	A	B	A	B	A	A	A	A	B	B	A
BS00094888	1B	61.7	A	B	B	-	A	B	A	B	A	B	B	A	A	A	B	A	-	B	A	A	B	A	A	B	B	A	A	A	A	B	A	B	A	B	B	B	A	B	A	B	A	A	A	A	B	B	A
BS00101500	1B	61.7	A	B	B	-	A	B	A	B	A	B	B	A	A	A	B	A	-	B	A	A	B	A	A	B	B	A	A	A	A	B	A	B	A	B	B	B	A	B	A	B	A	A	A	A	B	-	A
BS00110104	1B	61.7	A	B	B	B	A	B	A	B	A	B	B	A	A	A	B	A	-	B	A	A	B	A	A	B	-	A	A	A	A	B	A	B	A	B	B	B	A	B	A	B	A	A	A	A	B	B	A
BS00110148	1B	61.7	A	B	B	B	A	B	A	B	A	B	B	A	A	A	B	A	-	B	A	A	B	A	A	B	B	A	A	A	A	B	A	B	A	B	B	B	A	B	A	B	A	A	A	A	B	B	-
BS00023213	1B	62.3	A	B	B	B	A	B	A	B	A	B	B	A	A	A	B	A	B	B	A	A	B	A	A	B	B	A	A	A	A	B	A	B	A	B	B	B	A	B	A	B	A	A	A	B	B	B	A
BS00022722	1B	62.9	A	B	-	B	A	B	A	B	A	-	B	A	A	A	B	A	B	B	A	-	B	A	A	-	B	A	A	A	A	B	A	B	A	B	B	B	A	B	A	B	A	A	A	B	-	B	A
BS00022303	1B	63.4	A	B	B	-	A	B	A	B	A	B	B	A	A	A	B	A	B	B	A	A	B	A	A	B	B	A	A	A	A	B	A	B	A	B	B	B	A	B	A	B	A	A	A	B	B	B	A
BS00023122	1B	63.4	A	B	B	B	A	B	A	B	A	B	B	A	A	A	B	A	B	B	A	A	B	A	A	B	B	A	A	A	A	B	A	B	A	B	B	B	A	B	A	B	A	A	A	B	B	B	A
BS00021946	1B	64	A	B	B	-	A	B	A	B	A	B	B	A	A	A	B	A	B	B	A	A	B	A	A	B	-	A	-	A	A	-	A	B	A	B	B	B	A	-	A	B	A	A	A	B	B	-	A
BS00021947	1B	64	A	B	B	B	A	B	A	B	A	-	B	A	A	A	B	A	B	B	A	A	B	A	A	B	B	A	A	A	A	B	A	B	A	B	B	B	A	B	A	B	A	A	A	B	B	-	A
BS00022085	1B	64	A	B	B	B	A	B	A	B	A	B	B	A	A	A	B	A	-	B	A	A	B	A	A	B	B	A	A	A	A	B	A	B	A	B	B	B	A	B	A	B	A	A	A	B	B	B	A
BS00022104	1B	64	A	B	B	B	A	B	-	B	A	B	B	A	A	A	B	A	-	B	A	A	B	A	A	-	-	A	A	A	A	B	A	B	A	B	B	B	A	B	A	B	A	A	A	B	-	-	A
BS00022247	1B	64	A	B	B	B	A	B	A	B	A	-	B	A	A	A	B	A	-	-	A	-	-	A	A	B	B	A	A	A	A	B	A	B	A	B	B	B	A	B	A	B	A	A	A	B	B	B	A
BS00022375	1B	64	A	B	B	B	A	B	A	B	A	-	B	A	A	-	B	A	B	B	A	A	B	A	A	B	B	A	A	A	A	B	A	B	A	B	B	B	A	B	A	B	A	A	A	B	B	-	-
BS00022490	1B	64	-	B	-	B	-	B	A	B	A	B	B	A	A	A	B	A	B	B	A	A	B	A	A	B	B	A	A	A	A	B	A	B	A	B	B	B	A	B	A	B	A	A	A	B	-	-	A
BS00022536	1B	64	-	B	B	B	A	B	A	B	A	B	B	A	A	A	B	A	B	B	A	A	B	A	A	B	B	A	A	A	A	B	A	B	A	B	B	B	A	B	A	B	A	A	A	B	B	B	A
BS00022581	1B	64	-	-	-	B	-	B	-	B	A	-	B	A	A	A	B	A	B	B	A	A	B	-	A	B	B	A	A	A	A	B	A	B	A	B	B	B	A	B	-	B	A	A	A	B	B	B	-
BS00022616	1B	64	A	-	B	B	-	B	A	B	A	B	B	A	A	A	B	A	B	B	A	A	B	-	A	B	B	A	A	A	A	B	A	B	A	B	B	B	A	B	A	B	A	A	A	B	B	B	A
BS00022632	1B	64	A	B	-	B	A	B	A	B	A	-	B	A	A	A	B	A	B	B	A	A	B	A	A	-	-	A	A	A	A	-	A	B	A	B	B	B	A	B	A	B	A	A	A	B	B	B	A
BS00022645	1B	64	A	B	B	B	A	B	A	B	A	B	B	A	A	A	B	A	B	B	A	A	B	A	A	B	B	A	A	A	A	B	A	B	A	B	B	B	A	B	A	B	A	A	A	B	B	B	A
BS00022670	1B	64	A	B	B	-	A	B	A	B	A	B	B	A	A	A	B	A	B	B	A	-	B	A	A	B	B	A	-	A	A	B	A	B	A	B	B	B	A	B	A	B	A	A	A	B	B	B	A
BS00022687	1B	64	-	B	B	B	A	B	A	B	A	B	B	-	-	A	B	A	B	B	A	A	B	A	A	B	B	A	-	A	A	B	A	B	A	B	B	-	A	B	A	B	A	A	A	B	B	B	A
BS00022740	1B	64	A	B	-	B	A	B	A	B	A	B	-	-	A	A	B	A	B	-	A	A	B	A	A	B	B	A	A	-	A	B	A	B	A	B	B	B	A	B	A	B	A	A	A	B	B	B	A
BS00022748	1B	64	A	B	B	B	A	B	A	B	A	B	B	-	A	A	B	A	B	B	-	A	B	A	A	B	B	-	A	A	A	B	A	B	-	-	B	B	A	-	-	B	A	A	A	B	B	B	A
BS00022749	1B	64	A	-	B	B	A	B	A	B	A	-	B	A	A	A	B	A	B	B	A	A	B	A	A	B	B	A	A	A	A	B	A	B	A	B	B	B	A	B	A	B	A	A	A	B	B	B	A
BS00022888	1B	64	A	-	-	-	A	B	A	B	A	-	B	A	A	A	B	A	B	B	A	A	B	A	A	B	B	A	A	A	A	B	A	B	A	B	B	B	A	B	A	B	A	A	A	B	B	B	-
BS00022909	1B	64	A	B	B	B	A	B	A	B	A	B	B	A	A	A	B	A	B	B	A	A	B	A	A	B	B	A	A	A	A	B	A	B	A	B	B	B	A	B	A	B	A	A	A	B	B	B	A
BS00023162	1B	64	A	B	-	B	A	B	A	B	A	-	B	A	A	A	B	A	B	B	A	A	B	A	A	B	B	A	-	A	A	B	A	B	A	B	B	B	A	B	A	B	A	A	A	B	-	B	-
BS00021995	1B	64.5	A	B	B	B	A	B	A	B	A	-	B	A	A	A	B	A	B	B	A	A	B	A	A	B	B	A	A	A	A	B	A	B	A	B	B	B	A	B	A	B	A	A	A	B	B	B	A
BS00022005	1B	64.5	A	B	B	B	A	B	A	B	A	B	B	A	A	A	B	-	B	B	A	-	B	A	A	B	B	-	A	A	A	B	A	B	-	-	-	B	A	-	-	B	A	A	A	B	B	B	A
BS00022088	1B	64.5	A	B	B	B	A	B	A	B	A	B	B	A	A	A	B	-	B	B	A	-	B	-	A	B	B	A	-	A	A	B	A	B	A	B	-	B	A	B	-	B	A	A	-	B	B	B	A
BS00022221	1B	64.5	A	B	B	-	A	B	A	B	A	B	B	A	A	A	B	B	B	B	A	A	B	A	A	B	B	A	A	A	A	B	A	B	A	B	B	B	A	B	A	B	A	A	A	B	B	-	-
BS00022549	1B	64.5	A	B	B	B	A	B	A	B	A	B	B	A	A	A	B	A	B	B	A	A	B	A	A	B	B	A	A	A	A	B	A	B	A	B	B	B	A	B	A	B	A	A	A	B	B	B	A
BS00022625	1B	64.5	A	B	B	-	-	B	A	B	A	-	B	A	A	A	B	A	B	B	A	A	B	-	A	B	B	A	A	A	A	B	A	B	A	B	B	B	A	B	A	B	A	A	A	B	B	B	-
BS00022739	1B	64.5	A	B	-	B	A	B	A	B	A	-	B	A	A	-	-	-	B	B	A	A	B	A	A	B	B	A	A	A	A	B	A	B	A	B	B	B	A	B	A	B	A	A	A	B	B	B	A
BS00022783	1B	64.5	A	-	-	B	A	B	A	B	A	B	B	A	A	A	B	-	B	B	A	-	B	A	A	B	B	A	A	A	A	-	A	B	A	B	-	B	A	B	-	B	A	A	-	B	B	B	A
BS00022911	1B	64.5	A	B	B	B	A	B	A	B	A	B	B	A	A	A	B	B	B	B	A	A	B	A	A	B	B	A	A	A	A	B	A	B	A	B	B	B	A	B	A	B	A	A	A	-	B	B	A
BS00021954	1B	65.1	A	B	B	-	A	B	A	B	A	B	B	A	A	A	B	B	B	B	A	A	B	A	A	B	B	A	A	A	A	B	A	B	A	B	B	B	A	B	A	B	A	A	A	B	B	B	A
BS00022690	1B	65.1	A	B	-	B	A	-	A	B	A	-	B	A	A	A	B	-	B	-	A	-	B	A	A	B	B	A	A	A	A	B	A	B	A	B	-	B	A	B	-	B	A	A	-	B	B	B	A
BS00023044	1B	65.1	A	B	B	B	-	B	A	B	A	-	-	A	A	A	B	A	B	B	A	A	B	A	A	B	B	A	A	A	A	B	A	B	A	B	B	B	A	B	A	B	A	A	A	B	B	B	A
BS00021996	1B	65.6	A	B	-	B	A	B	A	B	A	-	B	A	-	A	-	A	B	-	A	A	B	-	A	-	B	A	A	A	A	B	A	B	A	B	-	B	A	B	A	-	A	-	A	B	-	-	-
BS00022007	1B	65.6	A	B	B	B	A	B	A	B	A	B	B	A	A	A	-	A	B	B	A	A	B	A	A	-	B	A	-	A	A	B	A	B	A	B	B	B	A	B	A	B	A	A	A	B	B	B	A
BS00022648	1B	65.6	A	B	B	B	A	B	A	B	A	B	B	A	A	A	B	A	B	B	A	A	B	A	A	B	B	A	A	A	A	B	A	B	A	B	B	B	A	B	A	B	A	A	A	B	B	B	A
BS00023302	1B	71.4	A	B	B	B	A	B	A	B	A	B	-	-	A	A	B	A	-	B	A	A	B	-	A	B	B	A	A	B	A	B	B	B	A	B	B	B	B	B	B	B	B	-	B	B	B	B	A
BS00022508	1B	72.7	A	B	-	-	A	B	A	B	B	B	B	A	A	A	B	A	B	B	A	A	B	A	A	B	B	A	A	A	A	B	A	B	A	B	B	B	A	B	A	B	A	A	A	B	B	B	A
BS00022575	1B	72.7	-	B	B	B	A	B	A	B	B	B	B	A	A	A	B	A	B	B	A	A	B	A	A	B	B	A	A	A	A	B	A	B	A	B	B	B	A	B	A	B	A	A	A	B	B	B	A
BS00091742	1B	72.7	A	B	-	B	-	-	-	-	-	-	B	A	A	-	B	A	-	B	A	A	-	A	-	-	-	A	A	-	-	B	-	-	A	B	-	-	-	-	-	-	-	A	-	-	B	B	-
BS00022011	1B	73.2	A	B	B	B	A	B	A	B	A	B	B	A	A	A	B	A	B	B	A	A	B	A	A	B	-	A	-	A	A	B	A	B	A	B	B	B	A	B	A	B	A	A	A	B	B	B	A
BS00022089	1B	73.2	A	B	B	B	A	B	-	B	A	B	B	A	A	A	B	A	B	B	A	A	B	A	A	-	-	A	A	A	A	-	A	B	A	B	B	B	A	B	A	B	A	A	A	B	B	B	A
BS00022133	1B	73.2	-	B	B	B	A	B	A	B	-	B	B	A	A	A	B	A	-	B	A	A	B	-	A	B	B	A	A	A	A	B	A	B	A	B	B	B	A	B	A	B	-	A	A	-	B	B	A
BS00022324	1B	73.2	A	B	B	B	A	B	A	B	A	B	B	A	A	A	B	A	B	-	A	A	B	A	A	B	B	A	A	A	A	B	A	B	A	B	B	B	A	B	A	B	A	A	A	B	B	B	A
BS00021907	1B	73.8	A	B	B	B	A	B	A	B	A	B	B	A	A	A	B	A	B	-	A	A	B	A	A	-	B	A	A	A	A	B	A	B	A	B	B	-	A	-	A	B	A	A	A	A	B	B	A
wPt-345	1B	73.8	-	B	B	B	A	B	A	B	-	B	B	A	A	A	B	A	B	B	A	A	B	A	A	B	B	A	A	A	A	B	A	B	A	B	-	B	A	B	A	B	A	A	A	A	B	B	A
bArc240b	1B	75	A	B	B	B	A	B	A	B	A	B	B	A	A	A	B	A	B	B	A	A	B	A	A	B	B	A	A	A	A	B	A	B	A	B	-	B	A	B	A	B	A	A	A	A	B	B	A
BS00009675	1B	75.5	-	B	B	B	A	B	A	B	-	B	B	A	A	A	B	-	B	-	-	-	B	A	A	-	B	A	A	A	-	B	-	B	-	B	B	B	A	-	A	B	-	A	-	A	B	B	A
BS00015200	1B	75.5	B	B	B	B	-	B	A	B	B	B	B	A	-	A	B	A	B	-	A	A	B	A	A	-	B	A	A	A	A	-	A	B	A	B	B	B	A	-	A	B	A	A	A	A	B	B	A
gwm11	1B	75.5	A	B	B	B	A	B	A	B	A	B	B	A	A	A	B	A	B	B	A	A	B	A	A	B	B	A	A	A	A	B	A	B	A	B	-	B	A	B	A	B	A	A	A	A	B	B	A
gwm18	1B	75.5	A	B	B	B	A	B	A	B	A	B	B	A	A	A	B	A	B	B	A	A	-	A	A	B	B	A	A	A	A	B	A	B	A	B	-	B	A	B	A	B	A	-	A	A	B	B	-
BS00031083	1B	76.2	A	B	B	B	A	B	A	B	B	B	B	A	A	A	B	A	-	B	A	A	B	A	A	B	B	A	A	A	A	B	A	B	A	B	B	B	A	B	A	B	A	A	A	A	B	-	A
BS00000496	1B	76.7	A	B	B	B	A	B	A	B	A	B	B	A	A	A	B	-	B	-	-	A	B	A	A	-	B	A	A	A	A	B	A	B	A	B	B	B	A	-	A	B	A	A	A	A	B	B	A
BS00003627	1B	76.7	A	B	B	B	A	B	A	B	A	B	B	A	A	A	B	A	B	-	A	A	B	A	A	-	B	A	A	A	A	B	A	B	A	B	B	B	A	-	A	B	A	A	-	A	B	B	A
BS00003634	1B	76.7	A	B	B	B	A	B	A	B	A	B	B	A	A	A	B	A	B	-	-	A	B	A	A	-	B	A	A	A	A	B	A	B	A	B	B	B	A	-	A	B	A	A	A	A	B	B	A
BS00009270	1B	76.7	A	B	B	B	A	B	A	B	A	B	B	A	A	A	B	A	B	-	-	A	B	A	A	-	B	A	A	A	A	B	A	B	A	B	B	B	A	-	A	B	A	A	A	A	B	B	A
BS00009483	1B	76.7	A	B	B	B	A	B	A	B	A	B	B	A	A	A	B	A	B	-	A	A	B	A	A	-	B	A	A	A	A	-	A	B	A	B	-	B	-	-	A	B	A	A	A	A	B	B	A
BS00009488	1B	76.7	A	B	B	B	A	B	A	B	-	B	-	A	A	A	B	A	B	-	A	A	B	A	A	-	B	A	A	A	A	B	A	B	A	B	B	B	A	-	A	B	A	A	A	A	B	B	A
BS00009731	1B	76.7	A	B	B	B	A	B	A	B	A	-	-	A	A	-	B	A	B	-	A	A	B	A	A	-	B	A	A	A	A	B	A	B	A	B	B	B	A	-	A	B	A	A	A	A	B	B	A
BS00010352	1B	76.7	A	B	B	B	A	B	A	B	A	B	B	A	A	A	B	A	B	-	A	A	B	A	A	-	B	A	A	A	A	B	A	B	A	B	B	B	-	-	A	B	A	A	A	A	B	-	A
BS00010428	1B	76.7	A	B	B	B	A	B	A	B	A	B	B	A	A	A	B	A	B	-	A	A	-	A	A	-	B	A	A	A	A	B	A	B	A	B	B	B	A	-	A	B	A	A	A	A	B	-	A
BS00011324	1B	76.7	A	B	B	B	A	B	A	B	A	B	B	A	A	A	B	A	B	-	A	A	B	A	A	-	B	A	A	A	A	B	A	B	A	B	B	B	A	-	A	B	A	A	A	A	B	A	A
BS00012051	1B	76.7	-	B	B	B	A	B	A	B	A	B	B	A	A	A	B	A	B	-	A	A	B	A	A	-	B	A	A	A	A	B	A	B	A	B	B	-	-	-	A	B	A	A	A	A	B	-	A
BS00029344	1B	76.7	A	B	B	B	A	B	A	B	A	B	B	A	A	A	B	A	-	B	A	A	B	A	A	B	B	A	A	A	A	B	A	B	A	B	B	B	A	B	A	B	A	A	A	A	B	B	A
BS00033681	1B	76.7	A	B	B	B	A	B	A	B	A	B	B	A	A	A	B	A	-	B	A	A	B	A	A	B	B	A	-	A	A	B	A	B	A	B	B	-	A	B	A	B	A	A	A	A	B	B	A
BS00034018	1B	76.7	A	B	B	B	A	B	A	B	A	B	B	A	A	A	B	A	-	B	A	A	B	A	A	B	B	A	A	A	A	B	A	B	A	B	B	B	A	B	A	B	A	A	A	A	B	B	A
BS00060270	1B	76.7	A	B	B	B	A	B	A	B	A	B	B	A	A	A	B	A	-	B	A	A	B	A	A	B	B	A	A	A	A	B	A	B	A	B	B	B	A	B	A	B	A	A	A	-	B	B	A
BS00067434	1B	76.7	A	B	B	B	A	B	A	B	A	B	B	A	A	A	B	A	-	B	A	A	B	A	A	B	-	A	A	A	A	B	-	B	A	B	B	-	-	B	A	-	A	A	A	A	B	B	-
BS00069722	1B	76.7	A	B	B	-	A	B	A	B	B	B	B	A	A	A	B	A	-	B	A	A	B	A	A	B	B	-	A	A	A	B	A	B	A	B	B	B	A	B	A	B	A	A	A	A	B	B	A
BS00070400	1B	76.7	A	B	B	B	A	-	A	B	B	B	B	A	A	A	B	A	-	-	A	A	B	A	A	B	B	A	A	A	A	B	A	B	A	B	B	B	A	B	A	B	A	A	A	A	B	B	A
BS00078228	1B	76.7	A	B	B	B	A	B	A	B	A	B	B	A	A	A	B	A	-	B	A	A	B	A	A	B	B	A	A	A	A	B	A	B	A	B	B	B	A	B	A	B	A	A	A	A	B	B	-
BS00078455	1B	76.7	A	B	B	B	A	B	A	B	A	B	B	A	A	A	B	A	-	B	A	A	B	A	A	B	B	A	A	A	A	B	A	B	A	B	B	B	A	B	A	B	A	A	A	A	B	B	A
BS00099275	1B	76.7	A	B	B	B	A	B	A	B	B	B	B	A	A	A	B	A	-	B	A	A	B	A	A	B	B	A	A	A	A	B	A	B	A	B	B	-	-	B	A	B	A	A	A	A	B	B	A
BS00108497	1B	76.7	A	B	-	B	A	B	A	B	A	B	B	A	A	A	B	A	-	B	A	A	B	A	A	B	B	A	A	A	A	B	A	B	A	B	B	B	A	B	A	B	A	A	A	A	B	B	A
BS00110149	1B	76.7	A	B	B	B	A	B	A	B	A	B	B	A	A	A	B	A	-	B	A	A	B	A	A	B	B	A	A	A	A	B	A	B	A	B	B	B	A	B	A	B	A	A	A	A	B	B	A
BS00110480	1B	76.7	-	B	B	B	A	B	A	B	A	B	B	A	A	A	B	A	-	B	A	A	B	A	A	B	B	A	A	A	A	B	A	-	A	B	B	-	A	B	A	-	A	A	A	A	-	B	A
BS00110481	1B	76.7	A	B	B	B	A	B	A	B	A	B	B	A	A	A	B	A	-	B	A	A	B	A	A	B	B	A	A	-	A	-	-	B	A	-	B	-	-	B	A	B	-	A	A	A	B	B	A
BS00024006	1B	77.8	-	-	-	-	-	-	-	B	B	B	B	A	A	A	B	A	-	B	A	A	B	A	A	B	B	A	A	A	A	B	A	B	A	B	B	B	A	B	A	B	A	A	A	-	B	-	-
BS00024300	1B	77.8	A	B	B	B	A	B	A	B	B	B	B	A	A	A	B	A	-	B	A	A	B	A	A	B	B	A	-	A	A	B	-	B	-	B	B	-	-	B	A	-	A	-	A	A	B	B	A
BS00095568	1B	77.8	A	B	B	B	A	B	A	B	B	B	B	A	A	A	B	A	-	B	A	A	B	A	A	B	B	A	A	A	A	B	A	B	A	B	B	B	A	B	A	B	A	A	A	A	B	B	A
BS00095569	1B	77.8	A	B	B	B	A	B	A	B	B	B	B	A	A	A	B	A	-	B	A	A	B	A	A	B	B	A	A	A	A	B	A	B	A	B	B	B	A	B	A	B	A	A	A	A	B	B	A
BS00001224	1B	79.1	A	B	B	B	A	B	A	B	B	B	B	A	A	A	B	A	B	-	A	A	B	A	A	-	B	A	A	A	A	B	A	A	A	B	B	B	A	-	A	B	A	A	A	A	B	B	A
BS00070147	1B	79.1	A	B	B	B	A	B	A	B	B	B	B	A	A	A	B	A	-	B	A	A	B	A	A	B	B	A	A	A	A	B	A	A	A	B	B	B	A	B	A	B	A	A	A	A	B	B	A
BS00071788	1B	79.1	A	B	B	B	A	B	A	B	B	B	B	A	A	A	B	A	-	B	A	A	B	A	A	B	B	A	A	A	A	B	A	A	A	B	B	B	A	B	A	B	A	A	A	A	B	B	A
BS00041355	1B	79.7	A	B	B	B	A	B	A	B	B	-	A	A	A	A	B	A	-	B	A	A	B	A	A	-	B	A	A	A	A	B	-	A	A	B	B	-	-	B	A	-	-	-	A	A	B	-	A
BS00111036	1B	79.7	-	B	-	B	A	B	A	B	B	B	A	A	A	A	B	A	-	B	A	A	B	A	A	B	B	A	-	A	A	-	-	A	-	B	B	-	B	B	A	B	A	A	A	A	B	B	A
BS00005206	1B	82.6	A	B	B	B	A	B	A	B	B	B	B	A	A	A	B	A	-	B	A	A	B	A	A	B	B	A	A	A	A	B	A	B	A	B	B	-	A	B	A	B	A	A	A	A	B	B	A
BS00009945	1B	82.6	A	B	B	B	A	B	A	B	B	B	B	A	A	A	B	A	B	-	-	A	B	A	A	-	B	A	A	A	A	B	A	B	A	B	B	B	A	-	-	B	A	A	A	A	B	B	A
BS00023113	1B	82.6	A	B	B	B	A	B	A	B	B	-	-	A	A	A	B	A	B	B	A	A	B	A	A	-	-	A	A	A	A	-	A	B	A	B	B	B	A	-	A	B	A	A	A	-	B	B	A
BS00023142	1B	82.6	A	-	B	B	-	B	A	B	B	-	B	-	A	A	B	A	B	B	A	A	B	-	A	B	B	A	A	A	A	B	A	B	A	B	B	B	A	B	A	B	A	A	A	B	B	B	A
BS00034925	1B	82.6	A	B	B	B	A	B	A	B	B	B	-	A	A	A	B	A	-	B	A	A	B	A	A	B	B	A	A	A	A	B	A	B	A	B	B	B	A	B	A	B	A	A	A	A	B	B	A
BS00076504	1B	82.6	A	B	B	B	A	B	A	B	B	B	B	A	A	A	B	A	-	B	A	A	B	A	A	B	B	A	A	A	A	B	A	B	A	B	B	B	A	B	A	B	A	A	A	A	B	B	A
BS00077329	1B	82.6	A	B	B	B	-	B	A	B	B	B	B	A	A	A	B	A	-	B	A	A	B	A	A	B	B	A	A	A	A	B	A	B	A	B	B	B	A	B	A	B	A	A	A	-	B	-	-
BS00085359	1B	82.6	A	B	B	B	A	B	A	B	B	B	B	A	A	A	B	A	-	B	A	A	B	A	A	B	B	A	A	A	A	B	A	B	A	B	B	B	A	B	A	B	A	A	A	A	B	B	A
BS00091871	1B	82.6	A	B	B	B	A	B	A	B	B	B	B	A	A	A	B	A	-	B	A	A	B	A	A	B	B	A	-	A	A	B	-	B	A	B	B	-	B	B	A	-	B	A	A	A	B	B	A
BS00091872	1B	82.6	A	B	B	B	A	B	A	B	B	B	B	A	A	A	B	A	-	B	A	A	B	A	A	B	B	A	A	A	A	B	A	B	A	B	B	B	A	B	A	B	A	A	A	A	B	B	A
BS00100736	1B	82.6	A	B	B	B	A	B	A	B	B	B	-	A	A	A	B	A	-	B	A	A	B	A	A	B	-	A	-	A	A	B	A	-	A	B	B	-	-	-	A	-	-	A	A	A	B	B	A
BS00023001	1B	83.9	A	-	A	B	A	B	A	B	B	A	-	A	A	A	B	-	B	B	A	A	B	A	A	B	B	A	A	A	A	B	A	A	A	B	B	B	A	B	A	B	A	A	A	B	B	-	A
BS00022878	1B	84.5	A	-	A	B	-	B	A	B	B	B	A	-	A	A	B	A	-	B	A	A	-	A	A	B	B	A	A	A	A	B	A	A	A	B	B	B	A	B	A	B	A	A	A	B	B	B	A
BS00010735	1B	86.2	A	B	B	-	A	B	A	B	B	B	-	A	-	A	B	A	B	-	A	A	A	A	A	-	B	A	A	A	A	B	A	-	A	B	B	B	A	-	A	B	-	A	-	A	B	-	-
BS00012056	1B	86.2	A	B	B	B	A	B	A	B	B	B	A	A	A	A	B	A	B	-	A	A	A	A	A	-	B	A	A	A	A	B	A	A	A	B	B	B	A	-	A	B	A	A	A	A	B	B	A
BS00018653	1B	86.2	A	B	-	-	A	-	-	-	B	B	A	A	A	-	B	A	B	-	A	-	A	A	A	-	B	A	-	A	A	B	A	A	A	B	B	B	A	-	A	-	A	-	-	-	B	B	-
BS00096157	1B	86.2	A	B	-	B	-	B	A	B	B	B	-	-	A	A	B	A	-	B	A	A	A	A	A	B	B	A	A	A	A	B	A	A	A	B	B	B	-	B	A	-	A	-	A	A	B	B	A
BS00022343	1B	86.8	A	B	B	B	A	B	A	B	B	-	A	A	A	A	B	A	B	B	A	A	A	A	A	B	B	A	A	A	A	B	A	A	A	B	-	B	A	B	-	B	A	A	-	B	B	B	A
BS00022569	1B	86.8	A	B	B	B	A	B	A	B	B	B	A	-	-	A	B	A	B	B	A	A	A	A	A	B	B	A	A	A	A	B	A	A	A	B	B	B	A	B	A	B	A	A	A	B	B	B	-
BS00022615	1B	86.8	A	B	B	B	A	B	A	B	B	B	A	A	A	A	B	A	B	B	A	A	A	A	A	B	B	A	A	A	A	B	A	A	A	B	B	B	A	B	A	B	A	A	A	B	B	B	A
BS00022842	1B	86.8	A	B	B	B	A	B	A	B	B	B	A	A	A	A	B	A	B	B	A	A	A	A	A	B	B	A	A	A	A	B	A	A	A	B	B	B	A	B	A	B	A	A	A	B	B	B	A
BS00022920	1B	86.8	-	-	B	-	A	B	A	B	B	B	-	A	A	A	B	A	B	B	A	A	A	A	A	B	B	A	A	A	A	B	A	A	A	B	B	B	A	B	A	B	A	A	A	B	-	B	A
BS00021711	1B	87.4	A	B	B	B	A	B	A	B	B	B	A	A	A	A	B	A	B	-	A	A	A	A	A	-	B	A	A	A	A	B	A	A	A	B	B	B	A	-	A	B	A	A	A	A	B	B	A
BS00041869	1B	87.4	A	B	B	B	A	B	A	B	B	B	A	A	A	A	B	A	-	B	A	A	A	A	A	B	-	A	-	A	A	B	A	A	A	B	B	-	A	B	A	B	A	A	A	A	B	B	A
BS00107799	1B	87.4	A	B	B	B	A	B	A	B	B	B	A	A	A	A	B	A	-	B	A	A	A	A	A	B	B	A	A	A	A	B	A	A	A	B	B	B	A	B	A	B	A	A	A	A	B	B	A
BS00010130	1B	87.9	-	B	B	B	A	B	-	-	B	B	A	-	-	A	B	A	B	-	A	A	-	-	-	-	B	A	-	-	A	B	A	A	A	B	B	B	-	-	A	B	A	A	-	A	B	-	-
BS00010475	1B	87.9	A	B	B	B	A	B	A	B	B	B	A	A	-	A	B	A	B	-	-	A	A	A	A	-	B	A	A	A	A	B	A	A	A	B	B	B	A	-	A	B	A	A	A	A	B	B	A
BS00010779	1B	87.9	-	B	B	B	A	B	A	B	B	B	A	A	A	A	B	A	B	-	-	A	A	A	A	-	B	A	A	A	A	B	A	A	A	B	B	B	A	-	A	B	A	A	A	A	B	B	A
BS00010888	1B	87.9	A	B	B	B	A	B	A	B	B	B	A	A	A	A	B	A	B	-	A	A	A	A	A	-	B	A	A	A	A	B	A	A	A	B	B	B	A	-	A	B	A	A	A	A	B	B	A
BS00011973	1B	87.9	-	B	B	B	A	B	A	-	B	B	A	A	A	A	B	A	B	-	A	A	A	A	A	-	B	A	A	A	A	B	A	A	A	B	B	B	A	-	A	B	A	A	A	A	B	-	A
BS00012456	1B	87.9	A	B	B	B	A	B	A	B	B	B	A	A	A	A	B	A	B	-	A	A	A	A	A	-	B	A	A	A	A	B	A	A	A	B	B	B	A	-	A	B	A	A	A	A	B	B	A
BS00022093	1B	87.9	-	B	B	B	A	B	A	B	B	-	A	A	A	A	B	A	-	B	A	A	A	-	A	B	B	A	A	A	A	B	A	A	A	B	B	B	A	B	A	B	A	A	A	-	B	B	A
BS00065126	1B	87.9	A	B	B	B	A	B	A	B	B	B	A	A	A	A	B	A	-	B	A	A	A	A	A	B	B	A	A	A	A	B	A	A	A	B	B	B	A	B	A	B	A	A	A	A	B	B	A
BS00072982	1B	87.9	-	B	B	B	-	B	A	-	B	B	A	A	A	A	B	A	-	B	A	A	A	A	A	B	B	A	A	A	A	B	A	-	A	B	B	B	A	B	A	B	A	A	A	A	B	B	-
wmc419	1B	87.9	A	B	B	B	A	B	A	B	B	B	A	A	A	A	B	A	B	B	A	A	A	A	A	B	B	A	A	A	A	B	A	A	A	B	-	B	A	B	A	B	-	-	-	-	-	-	-
BS00024010	1B	88.5	A	B	B	B	A	B	A	B	B	B	A	A	A	A	B	A	-	B	A	A	A	A	A	B	B	A	A	A	A	B	A	A	A	B	B	B	A	B	A	B	A	A	A	A	B	B	A
BS00024011	1B	88.5	-	B	B	-	A	B	A	-	B	B	A	A	A	A	B	A	-	B	A	A	A	A	A	B	B	A	A	A	A	B	A	A	A	B	B	B	A	B	A	B	A	A	A	A	B	B	A
BS00001414	1B	89	A	B	B	B	A	B	A	B	B	B	A	A	A	A	B	A	B	-	A	A	A	A	A	-	B	A	A	A	A	B	A	A	A	B	B	B	A	-	A	B	A	A	A	A	B	B	A
BS00010399	1B	89	-	B	B	B	A	-	-	B	B	-	-	A	A	A	-	-	-	-	A	-	A	A	A	-	B	-	-	-	A	B	A	A	A	B	B	B	A	-	A	B	A	A	A	A	B	B	A
BS00011062	1B	89	A	B	B	B	A	B	A	B	B	B	A	A	A	A	B	A	B	-	A	A	A	A	A	-	B	A	A	A	A	B	A	A	A	B	B	B	A	-	A	B	A	A	A	A	B	B	A
BS00011274	1B	89	A	B	B	B	A	B	A	B	B	B	A	A	A	A	B	A	B	-	A	A	A	A	A	-	B	A	A	A	A	B	A	A	A	B	B	B	A	-	A	B	A	A	A	A	B	B	A
BS00011423	1B	89	A	B	B	B	A	B	-	B	B	B	A	A	A	A	B	A	B	-	A	A	A	A	A	-	B	A	A	A	A	B	A	A	A	B	B	B	A	-	A	B	A	A	A	A	B	B	A
BS00011841	1B	89	A	B	B	B	A	B	-	B	B	B	A	A	A	A	B	A	B	-	A	A	A	A	A	-	B	A	A	A	A	B	A	A	A	B	B	B	A	-	A	B	A	A	A	A	B	B	A
BS00038643	1B	89	A	B	B	B	A	B	A	B	B	B	A	A	A	A	B	A	-	B	A	A	A	A	A	B	B	A	A	A	A	B	A	A	A	B	B	B	A	B	A	B	A	A	A	A	B	B	A
BS00086854	1B	89	A	B	B	B	A	B	A	-	-	B	A	A	A	A	B	A	-	B	A	A	A	A	A	B	B	A	A	A	A	B	A	A	A	B	B	B	A	B	A	B	A	A	A	A	B	B	A
BS00094555	1B	89	A	B	B	B	A	B	A	B	B	B	A	A	A	A	B	A	-	B	A	A	A	A	A	B	B	A	A	A	A	B	A	A	A	B	B	B	A	B	A	B	A	A	A	A	B	B	-
cos1HA	1B	89	A	B	B	B	-	B	A	-	B	B	A	A	A	-	B	A	-	B	A	A	A	A	A	-	B	A	A	A	A	-	A	A	A	B	-	B	A	B	-	B	A	A	A	A	B	B	A
eAACmCCG96	1B	89	A	B	B	B	A	-	-	B	B	B	A	-	-	B	B	-	B	-	-	A	-	-	A	B	B	-	A	-	A	-	-	-	A	B	-	-	A	B	A	B	-	-	-	-	-	-	A
BS00010157	1B	94.3	-	B	B	B	A	B	A	-	B	B	-	A	A	A	B	A	B	-	A	A	-	-	A	-	B	A	A	-	A	B	A	A	A	-	B	B	-	-	A	B	-	A	A	-	B	-	-
BS00021710	1B	94.3	A	B	B	B	A	B	A	B	B	B	A	-	A	A	B	A	B	-	A	A	-	-	A	-	B	A	A	A	A	B	A	A	A	B	B	B	-	-	A	B	A	A	A	A	B	-	A
BS00024063	1B	94.3	A	B	B	B	A	B	A	B	B	B	-	A	A	A	B	A	-	B	A	A	A	A	A	B	B	A	A	A	A	B	A	A	A	B	B	B	A	B	A	B	A	A	A	A	B	B	A
BS00046092	1B	94.3	A	B	-	B	A	B	A	B	B	B	A	A	A	A	B	A	-	B	A	A	A	-	A	B	B	A	A	A	A	B	A	A	A	B	B	B	A	B	A	B	A	A	A	A	B	B	A
BS00078969	1B	94.3	A	B	B	B	A	B	A	B	B	B	A	-	A	A	B	A	-	B	A	A	A	A	A	B	B	A	A	A	A	B	A	A	A	B	B	B	A	B	A	B	A	A	A	A	B	-	A
proGluB1	1B	94.3	A	B	B	B	A	B	A	B	B	B	A	A	A	A	B	A	B	B	A	A	A	A	A	B	B	A	A	A	A	B	A	A	A	B	-	B	A	B	A	B	A	A	A	A	B	B	A
BS00010625	1B	94.8	A	B	B	B	A	B	A	B	B	B	A	A	A	A	B	A	B	-	-	A	A	A	A	-	B	A	A	A	A	B	A	A	A	B	B	B	A	-	A	B	A	A	A	A	B	B	A
BS00012021	1B	94.8	-	B	B	B	A	B	A	-	B	B	A	A	A	A	B	A	B	-	A	A	-	A	A	-	B	A	A	-	A	-	A	A	A	B	B	B	A	-	A	B	A	A	A	A	B	B	-
BS00067769	1B	94.8	A	B	B	B	A	B	A	B	B	B	A	A	A	A	B	A	-	B	A	A	A	A	A	B	B	A	A	A	A	B	A	A	A	B	B	-	A	B	A	B	A	A	A	A	B	B	A
BS00067971	1B	94.8	A	B	B	B	A	B	A	B	B	B	A	A	A	A	B	A	-	B	A	A	A	A	A	B	B	A	A	A	A	B	A	A	A	B	B	B	A	B	A	B	A	A	A	A	B	B	A
BS00021975	1B	95.5	A	B	A	B	-	B	A	B	B	-	A	A	A	A	B	A	B	B	A	A	A	A	A	B	B	A	A	A	A	B	A	A	A	B	B	B	A	B	A	B	A	A	A	-	B	B	A
BS00021988	1B	95.5	A	B	-	B	A	B	A	B	B	B	A	-	A	A	B	A	B	B	A	A	A	A	A	B	B	A	A	A	A	B	A	A	-	B	B	B	A	B	A	B	A	A	A	B	B	B	A
BS00022468	1B	95.5	A	-	-	-	-	-	A	B	B	-	A	A	A	A	B	A	B	B	A	A	A	A	A	B	B	A	A	A	A	B	A	A	A	B	B	B	A	B	A	B	A	A	A	-	-	-	A
BS00022778	1B	95.5	A	B	B	-	-	B	A	B	B	B	-	A	A	A	B	A	B	B	A	A	A	A	A	B	B	A	A	A	A	B	A	A	A	B	B	B	A	B	A	B	A	A	A	B	B	B	-
BS00022779	1B	95.5	A	B	-	B	A	B	A	B	B	A	A	A	A	A	B	A	-	B	A	A	A	A	A	B	B	A	A	A	A	B	A	A	A	-	B	B	A	B	A	B	A	A	A	B	B	B	A
BS00022883	1B	95.5	A	B	-	B	A	B	A	B	B	-	A	A	A	A	B	A	-	B	-	A	A	A	A	-	B	A	A	A	A	-	A	A	A	B	B	B	A	B	A	B	A	A	A	B	B	B	-
BS00001835	1B	96.1	A	B	-	B	A	B	A	B	B	-	A	A	A	-	B	A	-	-	A	A	-	A	-	B	B	-	A	A	A	B	A	-	A	B	B	B	-	B	A	B	-	A	-	-	-	B	A
BS00010536	1B	96.8	A	B	B	B	A	B	A	B	B	B	A	A	A	A	B	A	B	-	-	A	A	A	A	-	B	A	A	A	A	B	A	A	A	B	B	B	A	-	A	B	A	A	A	A	B	B	A
BS00010938	1B	96.8	A	B	B	B	A	B	A	B	B	B	A	A	A	A	B	A	B	-	A	A	A	A	A	-	B	A	A	A	A	B	A	A	A	B	B	B	A	-	A	B	A	A	A	A	B	B	A
BS00091465	1B	96.8	A	B	B	B	A	B	A	B	B	B	A	A	A	A	B	A	-	B	A	A	A	A	A	B	B	A	A	A	A	B	A	A	A	B	B	B	A	B	A	B	A	A	A	A	B	B	A
BS00003934	1B	97.3	A	B	B	B	A	B	A	B	B	B	A	A	A	A	B	A	B	-	-	A	A	A	A	-	B	-	A	A	A	B	A	A	A	B	B	B	A	-	A	B	A	A	A	-	B	B	A
BS00009706	1B	97.3	A	B	B	B	A	B	A	B	B	B	A	A	A	A	B	A	B	-	A	A	A	A	A	-	B	A	A	A	A	B	A	A	A	B	B	B	A	-	A	B	A	A	A	A	B	B	A
BS00019800	1B	97.3	A	B	-	B	A	B	A	B	B	B	A	A	A	A	B	A	-	B	A	A	A	A	A	B	B	A	A	A	A	B	A	A	A	B	B	-	A	B	A	B	A	A	A	A	B	B	A
BS00013948	1B	97.9	A	B	B	B	A	B	A	B	B	B	A	A	A	A	B	A	B	-	A	A	A	A	A	-	B	A	A	A	A	B	A	A	A	B	B	B	A	-	A	B	A	A	A	A	B	B	A
BS00022626	1B	97.9	A	B	B	B	-	B	A	B	B	B	A	A	A	A	B	A	B	B	A	A	A	A	A	B	B	A	A	A	A	B	A	A	A	B	B	B	A	B	A	B	A	A	A	-	B	B	A
BS00086083	1B	97.9	A	B	-	B	A	B	A	B	B	B	A	A	A	A	B	A	-	B	A	A	A	A	A	B	B	A	A	A	A	B	-	-	-	B	B	-	-	B	A	-	-	-	A	A	B	B	A
BS00000651	1B	98.6	A	B	B	B	-	B	A	B	B	B	A	A	A	A	B	A	B	-	-	A	A	A	A	-	B	A	A	A	A	B	A	A	A	B	B	B	A	-	A	B	A	A	A	A	B	B	B
BS00004328	1B	98.6	-	B	B	B	A	B	A	B	B	B	A	A	A	A	B	A	B	-	-	-	A	A	A	-	B	A	A	A	A	B	A	A	A	B	B	B	A	-	A	B	A	A	A	A	B	B	B
BS00010009	1B	98.6	A	B	B	B	A	B	A	B	B	B	A	A	A	A	B	A	B	-	-	A	A	A	A	-	B	A	A	A	A	B	A	A	A	B	B	B	A	-	A	B	A	A	A	A	B	-	A
BS00012502	1B	98.6	A	B	B	B	A	B	A	B	B	B	A	A	A	A	B	A	B	-	-	A	A	A	A	-	B	A	A	A	A	B	A	A	A	B	B	B	A	-	A	B	A	A	A	A	B	B	B
BS00022392	1B	98.6	A	B	B	B	A	B	A	B	B	-	A	A	A	A	B	A	B	B	A	A	A	A	A	B	B	A	A	A	A	B	A	A	A	-	B	B	A	B	A	B	A	A	A	A	-	B	B
BS00022889	1B	98.6	A	-	B	B	-	-	-	B	B	-	A	A	-	A	B	-	B	B	A	-	A	A	A	-	B	A	A	A	A	B	A	A	A	B	-	B	A	-	-	B	A	A	-	A	B	B	-
BS00023148	1B	98.6	-	-	-	-	-	B	A	B	B	B	A	A	A	A	B	A	B	B	A	A	A	A	A	B	B	A	A	A	A	B	A	A	A	B	B	B	-	B	A	B	A	A	A	-	B	-	-
BS00048896	1B	98.6	A	B	B	B	A	B	A	B	B	B	A	A	A	A	B	A	-	B	A	A	A	A	A	B	B	A	A	A	A	-	A	A	A	-	B	-	A	B	A	B	A	A	A	A	B	B	A
BS00076394	1B	98.6	A	B	B	B	A	B	-	B	B	B	A	A	A	A	B	A	-	B	A	A	A	A	A	B	B	A	A	A	A	B	A	A	A	B	B	B	A	B	A	B	A	A	A	A	B	B	A
BS00095622	1B	98.6	A	B	B	B	A	B	A	B	B	B	A	A	A	A	B	A	-	B	A	A	A	A	A	B	B	A	A	A	A	B	A	A	-	B	B	-	A	B	A	-	A	A	A	A	B	B	A
BS00108257	1B	98.6	A	B	B	-	A	B	A	B	B	B	A	A	A	A	B	A	-	B	A	A	A	A	A	B	B	A	A	A	A	B	A	A	A	-	B	-	-	B	A	-	A	A	A	A	B	B	-
BS00110278	1B	98.6	A	B	B	-	A	B	A	B	B	B	A	A	A	A	B	A	-	B	A	A	A	A	A	B	B	A	A	A	A	B	A	A	A	B	B	B	A	B	A	B	A	A	A	A	B	B	A
BS00022530	1B	99.1	-	B	B	-	A	B	A	B	B	B	A	A	A	A	B	A	B	B	A	A	A	A	A	B	B	A	A	A	A	B	A	A	A	-	-	B	A	B	A	B	A	A	A	A	B	B	B
BS00022775	1B	99.1	A	B	B	B	A	B	A	B	B	B	A	A	A	A	B	A	-	B	A	A	A	-	A	B	B	A	A	A	A	B	A	A	A	B	B	-	A	B	A	B	A	A	A	A	B	B	-
BS00022567	1B	99.7	A	B	B	-	A	B	-	B	B	B	A	-	A	-	B	A	B	B	A	A	A	A	A	B	B	A	A	A	A	-	A	A	A	B	B	B	A	B	A	B	A	A	A	-	B	B	A
BS00022577	1B	100.2	A	B	B	B	A	B	A	B	B	B	A	A	A	A	B	A	B	B	A	A	A	A	A	B	B	A	A	A	A	B	A	A	A	B	B	B	A	B	A	B	A	A	A	A	B	B	-
BS00022851	1B	100.2	A	B	B	B	A	B	A	B	B	B	A	A	A	A	B	A	B	B	A	A	A	A	A	B	B	A	A	A	-	B	A	A	A	B	B	B	A	B	A	B	A	A	A	A	B	B	B
BS00006033	1B	100.8	-	B	B	B	-	-	A	B	B	B	-	A	A	A	-	A	-	B	A	-	A	-	A	B	B	-	A	A	A	-	-	A	-	B	B	-	A	-	-	-	-	A	-	A	B	B	A
BS00009324	1B	100.8	A	B	B	B	A	B	A	B	B	B	A	A	A	A	B	A	B	-	A	A	A	A	A	-	B	A	A	A	A	B	A	A	A	B	B	B	A	-	A	B	A	A	A	A	B	B	B
BS00009500	1B	100.8	-	B	B	B	A	-	A	B	B	-	A	A	A	A	B	A	B	-	A	A	A	A	A	-	B	-	A	A	-	B	A	A	A	B	B	B	A	-	A	B	A	A	-	A	B	B	B
BS00010148	1B	100.8	-	B	B	B	A	B	A	-	B	B	A	A	A	A	B	A	B	-	A	A	A	A	A	-	B	A	A	A	A	B	A	A	A	B	B	B	A	-	A	B	A	A	A	A	B	B	A
BS00010436	1B	100.8	A	B	B	B	-	B	A	B	B	B	A	A	A	A	B	A	B	-	A	A	A	A	A	-	B	A	A	A	A	B	A	A	A	B	B	B	A	-	A	B	A	A	A	A	B	B	A
BS00011934	1B	100.8	A	B	B	B	A	B	A	B	B	B	A	A	A	A	B	A	B	-	A	A	-	A	A	-	B	A	A	A	A	B	A	A	A	B	B	B	A	-	A	B	A	A	A	A	B	B	A
BS00012029	1B	100.8	A	B	B	B	A	B	A	B	B	B	A	A	A	A	B	A	B	-	A	A	A	A	A	-	B	A	A	A	A	B	A	A	A	B	B	B	A	-	A	B	A	A	A	A	B	B	A
BS00021680	1B	100.8	-	B	B	B	A	B	A	B	B	B	A	A	A	A	B	A	B	-	-	A	-	A	A	-	B	A	A	-	A	B	A	A	A	B	B	B	-	-	A	B	A	A	A	A	B	B	-
BS00042242	1B	100.8	A	B	B	B	A	B	A	B	B	B	A	A	A	A	B	A	-	B	A	A	A	A	A	B	B	A	A	A	A	B	A	A	A	B	B	B	A	B	A	B	A	A	A	A	B	B	B
BS00054785	1B	100.8	A	B	B	B	-	B	A	B	B	B	A	A	A	A	B	A	-	B	A	A	A	A	A	B	B	A	A	A	A	B	A	A	A	B	B	B	A	B	A	B	A	A	A	-	-	B	B
BS00069125	1B	100.8	A	B	B	B	A	B	A	B	B	B	A	A	A	A	B	A	-	B	A	A	A	A	A	B	B	A	A	A	A	B	A	A	A	B	B	-	-	B	A	B	A	A	A	A	B	B	B
BS00072457	1B	100.8	-	B	B	B	A	B	A	B	B	B	A	A	A	A	B	A	-	B	A	A	A	A	A	B	B	A	-	-	A	B	-	-	A	B	B	-	-	B	A	-	A	-	A	A	B	B	A
cfd2(2)	1B	102.6	A	B	B	B	A	A	A	B	B	B	A	A	A	A	B	A	B	B	A	A	A	A	A	B	B	A	A	A	A	B	A	A	A	B	-	A	A	B	A	B	-	-	-	-	-	-	-
BS00074911	1B	103.7	A	B	B	B	A	B	A	B	B	B	A	A	A	A	B	A	-	B	A	A	A	A	A	B	B	A	A	A	A	B	A	A	A	B	B	A	A	B	A	B	A	A	A	A	A	B	A
BS00081330	1B	104.3	A	B	B	B	A	B	A	B	B	B	A	A	A	A	B	A	-	B	A	A	A	A	A	B	B	A	-	A	A	B	A	A	-	B	B	-	-	B	A	-	A	A	A	A	A	B	B
BS00003633	1B	107.5	A	B	B	B	A	B	A	B	B	B	A	A	A	A	B	A	B	-	-	A	A	A	A	-	B	A	A	A	A	B	A	A	A	B	B	A	A	-	A	B	A	A	A	A	A	B	B
BS00021941	1B	107.5	A	B	B	-	A	B	A	B	B	-	A	A	A	A	B	A	B	B	A	A	A	A	A	B	-	A	-	A	A	B	A	A	A	B	B	A	A	B	-	B	A	A	A	-	A	B	-
BS00022411	1B	107.5	A	-	-	B	A	B	A	B	B	-	A	A	A	A	B	A	B	B	A	A	A	A	A	B	B	A	-	-	A	B	A	A	A	B	B	A	A	B	A	B	A	A	A	-	-	B	B
BS00002250	1B	108.2	A	B	B	B	A	B	A	B	B	B	A	A	A	A	B	A	B	-	-	A	A	A	A	-	B	-	A	A	A	-	A	A	A	B	B	A	A	-	A	B	A	A	A	A	A	B	A
BS00042340	1B	108.2	-	B	B	B	-	B	A	B	B	B	-	A	A	A	B	A	-	B	B	A	A	A	A	B	B	A	-	-	A	B	A	-	-	B	B	-	A	B	A	B	A	-	-	A	A	B	-
BS00065108	1B	108.2	A	B	B	B	A	B	A	B	B	B	A	A	A	A	B	A	-	B	A	A	A	A	A	B	B	A	A	A	A	B	A	A	A	B	B	A	A	B	A	B	A	A	A	A	A	B	A
BS00067525	1B	108.2	A	B	B	B	A	B	A	B	B	-	A	A	A	A	B	A	-	B	A	A	A	A	A	B	B	A	A	A	A	B	A	A	A	B	B	A	A	B	A	B	A	A	A	A	A	B	A
BS00107675	1B	109.2	A	B	B	B	A	A	A	B	B	B	A	A	A	A	B	A	-	B	A	A	A	A	A	B	B	A	A	A	A	B	A	A	A	B	B	A	A	B	A	-	A	A	A	A	A	B	A
wPt-1403	1B	111	-	B	B	-	A	A	A	B	B	B	A	A	A	A	B	A	B	B	A	A	A	A	A	B	B	A	A	A	A	B	A	A	A	B	-	A	A	B	A	B	-	A	A	A	A	B	A
BS00004129	1B	119.9	A	B	B	B	A	A	A	B	B	B	A	A	A	A	B	A	B	-	-	A	A	A	A	-	A	A	A	A	A	B	A	A	A	B	A	A	A	-	A	B	A	A	A	B	A	B	A
BS00010392	1B	119.9	A	B	B	B	A	A	A	B	B	B	A	A	A	A	B	A	B	-	A	A	A	A	A	-	A	A	A	A	A	B	A	A	A	B	A	A	A	-	A	B	A	A	A	B	A	B	A
BS00021876	1B	119.9	A	B	B	B	A	A	A	B	B	B	A	A	A	A	B	A	B	-	A	A	A	A	A	-	A	A	A	A	A	B	A	A	A	B	A	A	A	-	A	B	A	A	A	B	A	B	A
BS00032076	1B	119.9	A	B	B	B	A	A	A	B	B	B	A	A	A	A	B	A	-	A	A	A	A	A	A	B	A	A	A	-	A	B	A	A	A	B	A	A	A	B	A	B	A	A	A	B	A	-	A
BS00035268	1B	125.9	B	B	A	B	A	A	A	B	B	B	-	A	A	A	A	A	-	A	A	A	A	A	A	A	A	A	A	A	A	B	A	A	A	B	A	A	A	B	A	B	B	A	A	B	A	B	A
BS00066864	1B	125.9	B	B	A	B	A	A	A	B	B	B	-	A	A	A	A	A	-	A	A	A	A	A	A	A	A	A	A	A	A	B	A	A	A	B	A	A	A	B	A	B	B	A	A	B	A	B	A
eACTmCAC115	1B	125.9	B	B	A	B	-	-	-	B	B	B	A	-	-	A	A	-	B	-	-	A	-	-	A	A	A	-	A	-	A	-	A	-	A	B	-	-	A	B	A	B	-	-	-	-	-	-	A
wPt-2526L	1B	125.9	B	B	A	B	A	A	A	B	B	B	A	A	A	A	A	A	B	A	A	A	A	A	A	A	A	A	A	A	A	B	A	A	A	B	-	A	A	B	A	B	-	A	A	B	A	B	A
BS00009909	1B	127.1	B	B	A	B	A	A	A	B	B	B	A	A	A	A	A	A	B	-	-	A	A	A	A	-	A	A	A	A	A	B	A	A	A	B	A	A	A	-	A	B	B	-	A	B	A	B	A
BS00011670	1B	127.1	B	B	A	B	A	A	A	B	B	B	A	A	A	A	A	A	B	-	A	A	A	A	A	-	A	A	A	A	A	B	A	A	A	B	A	A	A	-	A	B	B	A	A	B	A	B	A
BS00023173	1B	129.6	-	B	A	-	A	A	A	B	B	B	-	A	A	B	A	A	B	A	A	A	A	A	A	A	A	A	A	A	A	B	A	A	-	B	A	A	A	B	A	B	B	A	A	B	A	B	-
BS00045568	1B	130.8	B	B	A	B	A	A	A	B	B	B	A	A	A	B	A	A	-	A	A	A	A	A	A	A	A	A	A	A	A	B	A	A	A	B	A	-	A	B	A	B	B	A	A	B	A	B	-
BS00012012	1B	137.6	B	B	A	B	A	A	A	-	B	B	A	A	A	B	A	A	B	-	A	A	-	-	-	-	A	A	A	-	A	B	A	A	A	B	A	A	A	-	A	B	B	B	A	B	A	A	A
BS00015519	1B	137.6	B	B	A	B	A	A	A	B	B	B	A	A	A	B	A	A	-	A	A	A	A	A	A	A	A	A	A	A	A	B	A	A	A	B	A	-	A	B	A	B	B	B	A	B	A	A	A
BS00032039	1B	137.6	B	B	A	B	-	A	A	B	B	-	A	A	A	B	A	A	-	A	A	A	A	-	A	A	A	A	A	A	A	B	A	A	A	B	A	A	A	B	A	B	B	B	A	B	A	A	A
wmc44	1B	140.7	B	B	A	B	A	A	A	B	B	B	A	A	B	B	A	A	B	A	A	A	A	A	A	A	A	A	A	A	A	B	A	A	A	B	-	A	A	B	A	A	B	B	A	B	A	A	A
BS00009709	1B	141.3	B	B	A	B	A	A	A	B	B	B	A	A	B	B	A	A	B	-	-	A	A	A	A	-	A	A	A	A	A	B	A	A	A	B	A	A	A	-	A	A	B	B	A	B	A	A	A
BS00010610	1B	141.3	B	B	-	-	A	A	A	B	B	B	A	A	B	B	-	A	B	-	-	A	A	A	A	-	A	-	A	A	A	-	A	A	A	B	A	A	A	-	A	A	B	B	A	B	A	-	-
BS00022342	1B	141.3	-	-	A	B	-	A	A	B	B	-	A	-	B	B	A	A	B	A	A	A	A	-	A	A	A	A	-	A	A	B	A	A	A	B	A	A	A	B	A	A	B	B	A	B	A	A	A
BS00078414	1B	141.9	B	B	-	B	A	A	A	B	B	B	A	A	B	B	A	A	-	A	A	A	A	A	A	A	A	A	A	A	A	B	A	A	A	B	A	A	A	B	A	A	B	B	A	B	A	A	A
BS00109526	1B	159.3	B	B	A	B	A	A	A	B	B	B	A	A	B	B	A	A	-	B	A	A	A	-	A	A	A	A	A	B	A	B	A	B	A	B	B	A	A	B	A	A	A	B	B	B	A	A	A
BS00107837	1B	164.1	B	B	A	B	A	A	A	B	B	B	A	A	B	B	A	A	-	B	A	A	A	A	A	A	A	A	A	B	A	B	A	B	A	B	B	A	A	B	A	A	A	B	B	B	B	A	A
BS00060686	1B	164.7	B	B	-	B	A	A	A	B	B	B	A	A	B	B	A	A	-	B	A	A	A	A	A	A	A	A	-	-	A	B	A	B	A	B	B	B	A	B	A	A	A	B	B	B	B	A	A
BS00110080	1B	164.7	B	B	A	B	A	A	A	B	B	B	A	A	B	B	A	A	-	B	A	A	A	A	A	A	A	A	A	B	A	B	A	B	A	B	B	B	A	B	A	A	A	B	B	B	B	A	A
BS00003702	1B	165.9	B	B	A	A	A	A	A	B	B	B	A	A	B	B	A	A	B	-	-	A	A	A	A	-	B	-	A	B	A	-	A	B	A	B	B	B	A	-	A	A	A	B	B	B	B	A	-
BS00011811	1B	169.3	B	B	A	A	A	A	A	B	B	A	A	A	-	B	A	A	B	-	A	B	A	A	A	-	B	A	A	B	A	B	A	B	A	B	B	B	A	-	A	A	A	B	B	B	B	A	B
BS00042081	1B	169.3	B	B	A	A	A	A	A	B	B	A	A	-	B	B	A	A	-	B	A	B	A	A	A	A	B	A	A	B	A	B	A	B	A	B	B	B	A	B	A	A	A	B	B	B	B	A	-
BS00067000	1B	170.4	B	B	A	A	A	A	A	B	B	A	A	-	B	B	A	A	B	-	A	B	A	-	A	A	B	A	A	B	A	B	A	B	A	B	B	B	A	B	A	A	A	B	B	B	B	A	A
wPt-4721	1B	171.7	-	B	A	A	A	A	A	B	B	A	A	A	B	-	A	A	B	B	A	B	A	A	A	A	B	A	A	B	A	B	A	B	A	B	-	B	-	B	A	A	-	B	B	B	B	A	B
bArc80	1B	174.2	B	B	A	A	A	A	-	B	B	A	A	B	A	B	A	A	B	B	A	B	A	A	A	A	B	A	A	B	A	B	A	B	A	B	-	B	A	-	A	A	A	B	B	-	B	A	B
BS00001128	1B	177.6	B	B	A	A	A	A	A	B	B	A	A	B	A	B	A	A	B	-	-	B	A	B	A	-	B	A	A	B	A	B	A	B	A	B	B	B	A	-	A	A	A	B	B	B	A	A	B
BS00022153	1B	177.6	B	B	A	A	A	A	A	B	B	A	A	B	A	B	A	A	B	-	A	B	A	B	A	A	B	A	A	-	A	B	A	B	A	B	B	B	A	B	A	A	A	B	B	-	A	A	B
BS00104270	1B	178.2	B	B	A	A	A	A	A	B	B	A	A	B	A	B	A	A	-	B	A	B	A	B	A	A	B	A	A	B	A	B	A	B	A	B	B	B	A	B	A	A	A	B	B	B	A	A	B
BS00058604	1D	0	A	B	-	A	A	A	A	A	B	A	A	A	A	B	A	B	-	A	A	B	B	B	B	B	A	A	B	B	B	B	B	B	B	B	A	B	B	A	B	B	B	A	A	B	B	A	A
BS00021723	1D	1.1	A	-	A	A	A	A	A	A	B	A	A	A	A	B	A	B	B	-	A	B	-	B	B	-	A	A	B	-	B	B	B	B	B	B	A	B	-	-	B	B	B	A	A	B	B	-	A
BS00022323	1D	1.1	A	B	A	A	A	A	A	A	B	A	A	A	A	B	A	B	B	A	A	B	B	B	B	B	A	A	B	B	B	B	B	B	B	-	A	B	B	A	B	B	B	A	A	B	B	A	A
BS00058612	1D	1.1	A	B	A	A	A	A	A	A	B	A	A	A	A	B	A	B	-	A	A	B	B	B	B	B	A	A	B	B	B	B	B	B	B	B	A	B	B	A	B	B	B	A	A	B	B	A	A
BS00090490	1D	1.6	A	B	A	A	A	A	A	A	B	A	A	A	A	B	A	B	-	A	A	B	B	B	B	-	A	A	B	B	B	B	B	B	B	B	A	B	B	A	B	B	B	A	A	B	B	A	A
BS00130989	1D	1.6	A	B	A	A	A	A	A	A	B	A	A	A	A	B	A	B	-	A	A	B	B	B	B	B	A	A	B	B	B	B	B	B	B	B	A	B	B	A	B	B	B	A	A	B	B	A	A
BS00152507	1D	1.6	A	B	A	A	A	A	A	A	B	A	-	A	A	B	A	B	-	A	A	-	B	B	B	B	A	-	B	B	B	B	B	B	B	B	A	B	B	A	B	B	B	A	A	B	B	-	-
BS00003806	1D	2.2	A	B	A	A	A	A	A	A	B	A	A	A	A	B	A	B	B	-	-	B	B	B	B	-	A	A	B	A	B	B	B	B	B	B	A	B	B	-	B	B	B	A	A	B	B	A	A
BS00021748	1D	2.2	-	-	A	A	A	A	A	A	-	A	A	A	A	B	A	B	B	-	A	B	-	-	B	-	A	A	B	-	B	B	B	B	B	B	A	B	B	-	B	B	B	A	A	B	B	A	-
BS00070878	1D	2.2	-	B	A	-	A	A	A	A	B	A	A	A	A	B	A	B	-	A	A	B	B	B	B	B	A	A	B	B	B	B	B	B	B	B	A	B	B	A	B	B	B	-	A	B	B	A	A
BS00028928	1D	16.7	A	B	A	-	-	A	A	A	B	-	A	A	A	A	A	B	-	A	A	B	B	B	B	A	A	A	B	B	B	B	A	B	B	A	A	-	B	A	B	B	-	A	A	B	A	A	A
cfd15b	1D	16.7	A	B	A	B	B	A	A	A	B	B	A	A	A	A	A	B	B	A	A	B	B	B	B	A	A	A	B	B	B	B	A	B	-	A	-	B	B	A	B	B	B	A	A	B	A	A	A
BS00055737	1D	23.7	A	B	A	-	B	A	A	A	B	B	A	A	A	A	A	B	-	A	A	B	B	B	B	A	A	A	A	B	B	B	A	B	B	A	A	B	B	A	B	B	B	A	A	-	A	B	A
BS00127198	1D	23.7	A	B	A	B	B	A	A	A	B	B	A	A	A	A	A	B	-	A	A	B	B	B	B	A	A	A	A	B	B	B	A	B	B	A	A	B	B	A	B	B	B	A	A	B	A	B	A
BS00131508	1D	23.7	A	B	A	B	B	A	A	A	B	B	A	A	A	A	A	B	-	A	-	B	B	B	B	A	A	A	A	B	B	B	A	-	B	A	A	B	B	A	B	B	B	A	A	B	A	B	A
BS00132371	1D	23.7	A	B	A	B	B	A	A	A	B	B	A	A	A	A	A	B	-	A	A	B	B	B	B	A	A	A	A	B	B	B	A	B	B	A	A	B	B	A	B	B	B	A	A	B	A	B	A
BS00179812	1D	23.7	A	B	A	B	B	A	A	A	B	B	A	A	A	A	A	B	-	A	A	B	B	B	B	A	A	A	A	B	B	B	A	B	B	A	A	B	B	A	B	B	B	A	A	B	A	B	A
wmc336b	1D	23.7	A	B	A	B	B	A	A	A	B	B	A	A	A	A	A	B	B	A	A	B	B	B	B	A	A	A	A	B	B	-	A	B	B	A	-	B	B	A	B	B	B	A	A	-	-	-	-
wPt-3738	1D	23.7	A	B	A	B	-	A	A	A	B	B	A	A	A	A	A	B	B	A	A	B	B	B	B	A	A	A	A	B	B	B	A	B	B	A	-	B	B	A	B	B	B	A	A	B	A	B	A
BS00147339	1D	24.2	A	B	A	B	B	A	A	A	B	B	A	A	A	A	A	B	-	A	A	B	B	B	B	A	A	A	A	B	B	B	A	B	B	A	A	B	B	A	B	B	B	A	A	B	A	B	B
BS00003751	1D	24.8	A	B	A	B	B	A	A	A	B	B	A	A	A	A	-	B	B	-	-	B	B	B	B	-	A	A	A	B	B	B	A	B	B	A	A	B	B	-	B	B	B	A	A	B	A	B	-
BS00030948	1D	24.8	A	B	A	B	B	A	A	A	B	B	A	A	A	A	A	B	-	A	A	B	B	B	B	A	A	A	A	B	B	B	A	B	B	A	A	B	B	A	B	B	B	A	A	B	A	B	B
BS00089270	1D	24.8	A	B	A	B	B	A	A	A	B	B	A	A	A	A	A	B	-	A	A	B	B	B	B	A	A	A	A	B	B	B	A	B	B	A	A	B	B	A	B	B	B	A	A	B	A	B	B
BS00121435	1D	24.8	A	B	A	B	B	A	A	A	B	B	A	A	A	A	A	B	-	A	A	B	B	B	B	A	A	A	A	B	B	B	A	B	B	A	A	B	B	A	B	B	B	A	A	B	A	B	B
BS00127390	1D	24.8	A	B	A	-	B	A	A	A	-	-	-	A	A	-	-	B	-	A	-	-	B	B	-	-	A	A	A	B	B	B	A	B	B	A	A	B	-	A	B	B	B	A	A	B	-	B	B
BS00160063	1D	24.8	A	B	-	B	B	A	A	A	B	B	A	A	A	A	A	B	-	A	A	B	B	B	B	A	A	A	A	B	B	B	A	B	B	A	A	B	B	A	B	B	B	A	A	B	A	B	B
BS00163777	1D	24.8	A	B	A	B	B	A	A	A	B	B	A	A	A	A	A	B	-	A	A	B	B	B	B	A	A	A	A	B	B	B	A	B	B	A	A	B	B	A	B	B	B	A	A	B	A	B	B
BS00119136	1D	25.9	A	B	A	B	B	A	A	A	B	B	A	A	A	A	A	B	-	A	A	B	B	B	B	A	A	A	A	B	B	B	A	B	B	A	A	B	B	A	B	B	B	A	A	B	A	B	A
BS00082223	1D	27.5	A	B	A	B	B	A	A	A	B	B	A	A	A	A	A	B	-	A	A	B	A	B	B	A	A	A	A	B	B	B	A	B	B	A	A	B	B	A	B	B	B	A	A	B	A	B	A
BS00118867	1D	27.5	A	B	A	B	B	A	A	A	B	B	A	A	A	A	A	B	-	A	A	B	A	-	B	A	A	-	A	B	B	B	A	B	B	A	A	B	B	A	B	-	B	A	A	B	A	B	A
BS00122637	1D	28.1	-	B	A	B	B	A	A	A	B	B	A	A	A	A	A	B	-	A	A	B	A	B	B	A	A	A	A	B	B	B	A	B	B	A	A	B	B	A	B	B	B	A	A	B	A	B	-
BS00022178	1D	32.1	-	B	A	B	B	A	A	A	B	B	B	A	A	A	A	B	-	A	A	B	A	B	B	A	A	A	A	B	A	B	A	B	B	A	A	B	B	A	B	B	B	A	A	B	A	B	A
BS00023049	1D	32.1	A	-	A	-	-	A	A	A	B	-	B	A	A	A	A	B	B	A	A	B	A	B	B	A	A	A	A	B	A	B	A	B	B	A	A	B	B	A	B	B	B	A	A	B	A	B	A
BS00023999	1D	32.1	A	B	-	B	B	A	A	A	B	B	B	A	A	A	A	B	-	A	A	B	A	B	B	A	A	A	A	B	A	B	A	B	B	A	A	B	B	A	B	B	B	A	A	B	A	B	A
eAGGmCTA110	1D	32.1	-	B	A	B	B	-	-	A	B	B	B	-	-	A	A	-	B	-	-	B	-	-	B	A	A	-	-	-	A	-	A	-	B	A	-	-	B	A	B	B	-	-	-	-	-	-	A
BS00117648	1D	32.1	A	B	A	B	B	A	A	A	B	B	B	A	A	A	A	B	-	A	A	B	A	B	B	A	A	A	A	B	A	B	A	B	B	A	A	B	B	A	B	B	B	A	A	B	A	B	A
BS00146623	1D	32.1	A	B	A	B	B	A	A	A	B	B	B	A	A	A	A	B	-	A	A	B	A	B	B	A	A	A	A	B	A	B	A	B	B	A	A	B	B	A	B	B	B	A	A	B	A	B	A
BS00159517	1D	32.1	A	B	A	B	B	A	A	A	B	B	B	A	A	A	A	B	-	A	A	B	A	B	B	A	A	A	A	B	A	B	A	B	B	A	A	B	B	A	B	B	B	A	A	B	A	B	A
cfd21b	1D	32.7	A	B	A	B	B	A	A	A	B	B	B	A	A	A	A	B	B	A	A	B	A	B	B	A	A	A	A	B	A	B	A	B	B	A	-	B	B	A	B	B	B	A	A	B	A	B	-
BS00119035	1D	32.7	A	B	A	B	B	A	A	A	B	-	B	A	A	A	A	B	-	A	A	B	A	B	B	A	A	A	A	B	A	B	A	B	B	A	A	B	B	A	B	B	B	A	A	B	A	B	A
BS00150147	1D	32.7	A	B	A	B	B	A	A	A	B	B	B	A	A	A	A	B	-	A	-	B	A	B	-	-	A	A	A	B	A	B	A	B	B	A	A	B	B	A	B	B	B	A	A	B	A	B	A
BS00010661	1D	35.8	A	B	A	B	A	A	A	A	B	B	B	A	A	A	A	B	B	-	-	B	A	A	B	-	A	A	A	B	A	B	A	B	B	A	A	B	B	-	B	B	B	A	A	B	A	B	B
BS00021819	1D	35.8	A	-	A	B	A	A	A	-	-	B	-	-	A	A	A	B	B	-	A	B	-	-	B	-	A	A	A	-	A	B	A	B	B	A	A	B	-	-	B	B	B	A	A	B	A	-	-
BS00022984	1D	35.8	A	-	-	B	A	A	A	A	B	B	B	A	A	A	A	B	B	A	A	B	A	A	B	A	A	A	A	B	A	B	A	B	B	A	A	B	B	A	B	B	B	A	A	B	A	B	B
BS00103876	1D	35.8	A	B	A	-	-	A	A	A	B	-	B	A	A	A	A	B	-	A	A	B	A	A	B	A	A	A	A	B	A	B	A	B	B	A	A	B	B	A	B	B	B	A	A	B	-	B	-
BS00122008	1D	35.8	A	B	A	-	A	A	A	A	B	B	B	A	A	A	A	B	-	A	A	B	A	A	B	A	A	A	A	B	A	B	A	B	B	A	A	B	B	A	B	B	B	A	A	B	A	B	B
BS00140901	1D	35.8	A	B	A	B	A	A	A	A	B	B	B	A	A	A	A	B	-	A	A	B	A	A	B	A	A	A	A	B	A	B	A	B	B	A	A	B	B	A	B	B	B	A	A	B	A	B	B
BS00180182	1D	35.8	A	B	A	B	A	A	A	A	B	B	B	A	A	A	A	B	-	A	A	B	A	A	B	A	A	A	A	B	A	B	A	B	B	A	A	B	B	A	B	B	B	A	A	B	A	B	B
wPt-8960	1D	35.8	A	B	A	B	A	A	A	A	B	B	B	-	A	A	A	B	B	A	A	B	A	A	B	A	A	A	A	B	A	B	A	B	B	A	-	B	B	A	B	B	B	A	A	B	A	B	A
BS00102902	1D	41	A	B	B	B	A	A	A	A	B	B	B	A	A	A	A	B	-	A	A	B	A	A	B	A	A	A	A	B	A	B	A	B	B	A	A	B	B	A	B	B	B	B	B	B	A	B	A
BS00078897	1D	43.6	B	B	-	B	A	A	A	A	B	B	B	A	A	A	A	B	-	A	A	B	A	A	B	A	-	A	-	-	A	B	A	-	B	A	A	-	-	A	-	-	-	-	B	B	-	B	-
BS00079462	1D	43.6	B	B	B	B	A	A	A	A	B	B	B	A	A	A	A	B	-	A	A	B	A	A	B	A	A	A	A	B	A	B	A	B	B	A	A	B	B	A	B	B	B	B	B	B	A	B	A
BS00082605	1D	43.6	B	B	B	B	A	A	A	A	B	B	B	A	A	A	A	B	-	A	A	B	A	A	B	A	A	A	A	B	A	B	A	B	B	A	A	-	B	A	B	B	B	B	B	B	A	B	A
BS00154028	1D	43.6	B	B	B	B	-	-	-	A	B	B	B	A	-	A	-	-	-	A	A	-	-	A	B	A	A	A	A	B	A	B	A	B	B	-	-	B	B	-	-	B	B	B	-	B	A	B	A
BS00183218	1D	45.7	B	B	B	B	A	A	A	A	B	B	B	A	A	A	A	B	-	A	A	B	A	A	B	B	A	A	A	B	A	B	A	B	B	A	A	B	B	A	B	B	B	B	B	B	A	B	A
BS00183552	1D	45.7	B	B	B	B	A	A	A	A	B	B	B	A	A	A	A	B	-	A	A	B	A	A	B	B	A	A	A	B	A	B	A	B	B	A	A	B	B	A	B	B	B	B	B	B	A	B	A
BS00183553	1D	45.7	B	B	B	B	A	A	A	A	B	B	B	A	A	A	A	B	-	-	A	B	A	-	B	B	A	A	A	B	A	B	A	B	B	A	A	B	B	A	B	B	B	B	B	B	A	B	A
BS00183554	1D	45.7	B	B	B	B	A	A	A	A	B	B	B	A	A	A	A	B	-	A	A	B	A	A	B	B	A	A	A	B	A	B	A	B	B	A	A	B	B	A	B	B	B	B	B	B	A	B	A
BS00022595	1D	46.2	B	-	B	B	A	A	A	A	B	B	B	A	A	A	A	B	A	A	A	B	A	A	-	-	-	B	A	B	A	-	A	B	B	A	A	B	B	A	B	B	B	B	B	A	A	B	B
BS00022633	1D	46.2	B	B	B	B	A	A	A	A	B	B	B	A	A	A	A	B	A	A	A	B	A	A	B	B	A	-	A	B	A	B	A	B	B	-	A	B	B	A	-	B	B	B	B	A	A	B	-
BS00009639	1D	46.8	-	-	B	B	A	A	A	-	-	B	B	A	A	A	A	B	A	-	A	-	A	A	-	-	A	B	A	B	A	A	A	B	B	A	-	-	B	-	B	B	B	-	-	-	A	B	A
BS00010486	1D	46.8	B	B	B	B	A	A	A	A	B	B	B	A	A	A	A	B	A	-	-	B	A	A	B	-	A	B	A	B	A	A	A	B	B	A	A	B	B	-	B	B	B	B	B	B	A	B	A
BS00011451	1D	46.8	B	B	B	B	A	A	A	A	B	B	B	A	A	A	A	B	A	-	A	B	A	A	B	-	A	B	A	B	A	A	A	B	B	A	A	B	B	-	B	B	B	B	B	B	A	B	B
BS00022168	1D	46.8	B	B	B	B	A	A	A	A	B	B	B	A	A	A	A	B	-	A	A	B	A	A	B	B	A	B	A	B	A	A	A	B	B	A	A	B	B	A	B	B	-	B	B	B	A	B	B
BS00024038	1D	46.8	B	B	B	B	A	A	A	A	B	B	-	A	A	A	A	B	-	A	A	B	A	A	B	B	A	B	A	B	A	A	A	B	B	A	A	B	B	A	B	B	B	B	B	B	A	B	B
BS00024099	1D	46.8	B	B	B	B	A	A	A	A	B	B	B	A	A	A	A	B	-	A	A	B	A	A	B	B	A	B	A	B	A	A	A	B	B	A	A	B	B	A	B	B	B	B	B	B	A	B	A
BS00034563	1D	46.8	B	B	-	-	A	A	A	A	B	B	B	A	A	A	A	-	-	A	A	B	A	A	B	-	A	B	A	B	A	A	A	-	-	A	A	-	B	A	B	B	B	B	-	B	A	-	B
BS00058268	1D	46.8	B	B	B	B	-	A	A	A	B	B	B	A	A	A	A	B	-	A	A	B	A	A	B	B	A	B	A	B	A	A	A	B	B	A	A	-	B	A	B	B	B	B	B	B	A	B	B
BS00063145	1D	46.8	B	B	-	-	-	A	A	A	B	B	B	A	A	A	A	B	-	A	A	B	A	A	B	B	A	B	A	B	A	A	A	B	B	A	A	B	B	A	B	B	B	B	B	B	A	B	-
BS00063146	1D	46.8	B	B	B	B	A	A	A	A	B	B	B	A	A	A	A	B	-	A	A	B	A	A	B	B	-	B	A	B	A	A	-	B	B	A	A	B	B	A	B	B	B	B	B	B	A	B	B
BS00065478	1D	46.8	B	B	B	B	A	A	A	A	B	B	B	A	A	A	A	B	-	A	A	B	A	A	B	B	A	B	A	B	A	-	-	B	B	A	A	-	-	A	B	B	B	B	B	B	A	B	B
BS00066847	1D	46.8	B	B	B	B	A	A	-	A	B	B	B	A	A	A	A	B	-	A	A	B	A	A	B	B	A	B	A	B	A	A	A	B	B	A	A	B	B	A	B	B	B	B	B	B	A	B	B
BS00074824	1D	46.8	B	B	B	B	A	A	A	A	B	B	B	A	A	A	A	B	-	A	A	B	A	A	B	B	A	B	A	B	A	A	A	B	B	A	A	B	B	A	B	B	B	B	B	B	A	B	B
BS00074825	1D	46.8	B	B	B	B	A	A	A	A	B	B	B	A	A	A	A	B	-	A	A	B	A	A	B	B	A	B	A	B	A	A	A	B	B	A	A	B	B	A	B	B	B	B	B	B	A	-	B
BS00086679	1D	46.8	B	B	B	B	A	A	A	A	B	B	B	A	A	-	A	B	-	A	A	B	A	A	B	B	A	B	A	B	A	A	A	B	B	A	A	B	B	A	B	B	B	B	B	B	A	B	B
BS00115336	1D	46.8	B	B	B	B	-	A	A	A	B	B	B	A	A	A	A	B	-	A	A	B	A	A	B	B	A	B	A	B	A	A	A	B	B	A	A	B	B	A	B	B	B	B	B	B	A	B	B
BS00123078	1D	46.8	B	B	B	B	-	A	A	A	B	B	B	A	A	A	A	B	-	A	A	B	A	A	B	B	A	B	A	B	A	A	A	B	B	A	A	B	B	A	B	B	B	B	B	B	A	B	B
BS00130675	1D	46.8	B	B	B	B	A	A	A	A	B	B	B	A	A	A	A	B	-	A	A	B	A	A	B	B	A	B	A	B	A	B	A	B	B	A	A	B	B	A	B	B	B	B	B	B	A	B	B
BS00147236	1D	46.8	B	B	B	B	A	A	A	A	B	B	B	A	A	A	A	B	-	A	A	B	A	A	B	B	A	B	A	B	A	B	A	B	B	A	A	B	B	A	B	B	B	B	B	B	A	B	B
BS00167855	1D	46.8	B	B	B	B	A	A	A	A	B	B	B	A	A	A	A	B	-	A	A	B	A	A	-	B	A	B	A	B	A	A	A	B	B	A	A	B	B	A	B	B	B	B	B	B	A	B	B
BS00179331	1D	46.8	B	B	B	B	A	A	A	A	B	B	B	A	A	A	A	B	-	A	A	B	A	A	B	B	A	B	A	B	A	A	A	B	B	A	A	B	B	A	B	B	B	B	B	B	A	B	B
BS00180315	1D	46.8	B	B	B	B	A	A	A	A	B	B	B	A	A	A	A	B	-	A	A	B	A	A	B	B	A	B	A	B	A	B	A	B	B	A	A	B	B	A	B	B	B	B	B	B	A	B	B
BS00180439	1D	46.8	B	B	B	B	A	A	A	A	B	B	B	A	A	A	A	B	-	A	A	B	A	A	B	B	A	B	A	B	A	A	A	B	B	A	A	B	B	A	B	B	B	B	B	B	A	B	B
BS00010435	1D	47.5	B	B	B	B	A	A	A	A	B	-	-	A	A	-	A	B	A	-	A	B	A	A	-	-	A	B	A	B	A	A	A	B	B	A	A	B	B	-	B	B	B	B	-	B	A	B	-
gwm458	1D	47.5	B	B	B	B	A	A	A	A	B	B	B	A	A	A	A	B	A	A	A	B	A	A	B	B	A	B	A	B	A	A	A	B	B	A	-	B	B	A	B	B	B	B	B	B	A	B	A
BS00179909	1D	47.5	B	B	B	B	A	A	A	A	B	B	B	A	A	A	A	B	-	A	A	B	A	A	B	B	A	B	A	B	A	A	A	B	B	A	A	B	B	A	B	B	B	B	B	B	A	B	B
BS00022027	1D	48.7	-	B	B	B	A	A	A	A	B	B	-	A	A	A	A	B	A	A	A	B	A	A	B	B	A	B	A	B	A	A	A	B	-	A	A	B	B	A	B	B	B	B	B	A	A	B	A
BS00022962	1D	48.7	B	B	-	-	A	A	A	A	B	B	B	A	A	A	A	-	A	A	A	B	A	A	B	B	A	B	A	B	A	A	A	B	B	A	A	B	B	A	B	B	B	B	B	A	A	B	A
BS00068256	1D	49.8	B	B	B	B	A	A	A	A	B	B	B	A	A	A	A	B	-	A	A	B	A	A	B	B	A	B	A	B	A	A	A	B	B	A	A	B	B	A	B	-	B	B	B	B	A	B	A
bArc240A	1D	50.4	B	B	B	B	A	A	A	A	B	B	B	A	A	A	A	B	A	A	A	B	A	A	B	B	A	B	A	B	A	A	A	B	B	A	-	B	B	A	B	B	B	B	B	-	A	B	A
BS00131973	1D	50.4	-	B	B	B	A	A	A	A	B	B	B	A	A	A	A	B	-	A	A	B	A	A	B	B	A	B	A	B	A	A	A	B	B	A	A	B	B	A	B	B	B	B	B	B	A	B	A
cfd19	1D	51	B	B	B	B	A	A	A	A	B	B	B	A	A	A	A	B	A	A	A	B	A	A	B	B	A	B	A	B	A	A	A	B	B	A	-	B	B	A	B	B	B	B	B	B	A	B	A
BS00165950	1D	51	B	B	B	B	A	A	A	A	B	B	B	A	A	A	A	B	-	A	A	B	A	A	B	B	A	B	A	B	A	A	A	B	B	A	A	B	B	A	B	B	B	B	B	B	A	B	A
BS00060042	1D	52.2	-	B	B	B	A	A	A	A	B	B	B	-	A	A	A	B	-	A	A	B	A	A	B	B	A	B	A	B	A	A	A	B	B	A	A	B	B	A	B	B	B	B	A	B	-	B	B
BS00067768	1D	53.8	B	B	B	-	A	A	A	A	A	B	B	A	A	A	A	B	-	A	A	B	A	A	B	B	A	B	A	A	A	A	A	B	B	A	A	B	B	A	B	B	B	B	A	B	A	B	B
BS00067933	1D	53.8	B	B	B	B	-	A	A	A	A	B	B	A	A	A	A	B	-	A	A	B	A	A	B	B	A	B	A	A	A	A	A	B	B	A	A	B	B	A	B	B	B	B	A	B	-	B	B
BS00120264	1D	53.8	B	-	-	B	A	A	A	-	A	B	B	A	A	A	A	B	-	A	A	B	A	A	B	-	-	B	-	A	A	-	-	B	-	A	-	-	-	-	B	-	-	-	A	B	-	B	B
BS00014671	1D	56.7	B	B	B	-	A	A	A	A	-	-	B	A	A	A	B	B	A	-	A	A	A	-	A	-	A	B	A	A	-	A	A	B	B	A	A	B	B	-	B	B	B	A	-	-	A	-	-
BS00082502	1D	56.7	B	B	B	B	A	A	A	A	A	B	B	A	A	A	B	B	-	A	A	A	A	A	A	B	A	B	-	A	A	A	-	B	B	A	A	-	B	B	B	B	B	A	A	B	A	B	A
BS00082503	1D	56.7	B	B	-	-	A	A	A	A	A	B	B	A	A	A	B	B	-	A	A	A	A	A	A	B	A	B	A	A	A	A	A	B	B	A	A	-	B	B	B	B	B	A	A	B	A	-	-
cos1Hb	1D	56.7	B	B	B	B	-	A	A	-	A	B	B	A	A	-	B	B	-	A	A	A	A	A	A	-	A	B	A	A	A	-	A	B	B	A	-	B	B	B	-	B	B	A	A	B	A	B	A
BS00119899	1D	56.7	B	B	B	B	A	A	A	A	A	B	B	A	A	A	B	B	-	A	A	A	A	A	A	B	A	B	A	A	A	A	A	B	B	A	A	B	B	B	B	B	B	-	A	B	A	B	A
BS00122927	1D	56.7	B	B	B	B	A	A	A	A	A	B	B	A	A	A	B	B	-	A	A	A	A	A	A	B	A	B	A	A	A	A	A	B	B	A	A	B	B	B	B	B	B	-	A	B	A	B	A
BS00133535	1D	56.7	B	B	B	B	A	A	A	A	A	B	B	A	A	A	B	B	-	A	A	A	A	A	A	B	A	B	A	A	A	A	A	B	B	A	A	B	B	B	B	B	B	A	A	B	A	B	A
BS00136178	1D	56.7	B	-	B	-	A	A	A	A	-	-	-	-	A	-	-	B	-	A	-	-	A	A	-	-	A	B	-	A	A	A	A	-	B	A	A	B	-	B	B	B	B	A	A	B	-	B	A
BS00139143	1D	56.7	B	B	B	B	A	A	A	A	A	B	B	A	A	A	B	B	-	A	A	A	A	A	A	B	A	B	A	A	A	A	A	B	B	A	A	B	B	B	B	B	B	A	A	B	A	B	A
BS00140044	1D	56.7	B	B	B	B	A	A	A	A	A	B	B	A	A	A	B	B	-	A	A	A	A	-	A	B	A	B	A	A	A	A	A	B	B	A	A	-	B	B	B	B	-	A	A	B	A	B	A
BS00148172	1D	56.7	B	B	B	B	A	A	A	A	A	B	B	A	A	A	B	B	-	A	A	A	A	A	A	B	A	B	A	A	A	A	A	B	B	A	A	B	B	B	B	B	B	A	A	B	A	B	A
BS00155963	1D	56.7	B	B	B	B	A	A	A	A	A	B	B	A	A	A	B	B	-	A	A	A	A	A	A	B	A	B	A	A	A	A	A	B	B	A	A	B	B	B	B	B	B	A	A	B	A	B	A
BS00156989	1D	56.7	B	B	B	B	A	A	A	A	A	B	B	A	A	A	B	B	-	A	A	A	A	A	A	B	A	B	A	A	A	A	A	B	B	A	A	B	B	B	B	B	B	A	A	B	A	B	A
BS00161679	1D	56.7	B	B	B	B	A	A	A	A	A	B	B	A	A	A	B	B	-	A	A	A	A	A	A	B	A	B	A	A	A	A	A	B	B	A	A	B	B	B	B	B	B	A	A	B	A	B	A
BS00162505	1D	56.7	B	B	-	B	A	A	A	A	A	B	B	A	A	A	B	B	-	A	A	A	A	A	A	B	A	B	A	A	A	A	A	B	B	A	A	B	B	B	B	B	-	A	A	B	A	B	A
BS00163096	1D	56.7	B	B	B	-	A	A	A	A	A	B	B	A	A	A	B	B	-	A	A	A	A	A	A	B	A	B	A	A	A	A	A	B	B	A	A	B	B	B	B	B	B	A	A	B	A	B	A
BS00163249	1D	56.7	B	B	B	B	A	A	A	A	A	B	B	A	A	A	B	B	-	A	A	A	A	A	A	B	A	B	A	A	A	A	A	B	B	A	A	B	B	B	B	B	B	A	A	B	A	B	A
BS00163543	1D	56.7	B	B	-	B	A	A	A	A	A	B	B	A	A	A	B	B	-	A	A	A	A	A	A	B	A	B	A	A	A	A	A	B	B	A	A	B	B	B	B	B	B	A	A	B	A	B	A
BS00181023	1D	56.7	B	B	B	-	A	A	A	A	A	B	B	A	A	A	B	B	-	A	A	A	A	A	A	B	A	B	A	A	A	A	A	B	B	A	A	B	B	B	B	B	-	A	A	B	A	B	A
BS00181025	1D	56.7	B	B	B	B	A	A	A	A	A	B	B	A	A	A	B	B	-	A	A	A	A	A	A	B	A	B	A	A	A	A	A	B	B	A	A	B	B	B	B	B	-	A	A	B	A	-	A
BS00181026	1D	56.7	B	B	B	B	A	A	A	A	A	B	B	A	A	A	B	B	-	A	A	A	A	A	A	B	A	-	A	A	A	A	A	B	B	A	A	B	B	B	B	B	B	A	A	B	A	B	A
BS00181313	1D	56.7	B	B	B	B	A	A	A	A	A	B	B	A	A	A	B	B	-	A	A	A	A	A	A	B	A	B	A	A	A	A	A	B	B	A	A	B	B	B	B	B	B	A	A	B	A	B	A
BS00182054	1D	56.7	B	B	B	B	A	A	A	A	A	B	B	A	A	A	B	B	-	A	A	A	A	A	A	B	A	B	A	A	A	A	A	B	B	A	A	B	B	B	B	B	B	-	A	B	A	B	A
BS00182055	1D	56.7	B	B	B	B	A	A	A	A	A	B	B	A	A	A	B	B	-	A	A	A	A	A	A	B	A	B	A	A	A	A	A	B	B	A	A	B	B	B	B	B	B	A	A	B	A	B	A
BS00183020	1D	56.7	B	B	B	B	A	A	A	A	A	B	B	A	A	A	B	B	-	A	A	A	A	A	A	B	A	B	A	A	A	A	A	B	B	A	A	B	B	B	B	-	B	A	A	B	A	B	A
BS00183021	1D	56.7	B	B	B	-	A	A	A	A	A	B	B	A	A	A	B	B	-	A	A	A	A	A	A	B	A	B	A	A	A	A	A	B	B	A	A	B	B	B	B	B	B	A	A	B	A	B	A
BS00183208	1D	56.7	B	B	B	B	-	A	-	-	A	B	B	A	A	A	B	B	-	A	A	A	A	-	A	B	A	B	A	A	A	A	A	B	B	A	A	B	B	B	B	B	B	A	A	B	A	B	A
BS00183209	1D	56.7	B	B	-	B	-	A	A	A	A	B	B	A	A	A	B	B	-	A	A	A	A	A	A	B	A	B	A	A	A	A	A	B	B	A	A	B	B	B	B	B	B	A	A	B	A	B	A
BS00183210	1D	56.7	B	B	B	B	-	A	A	A	A	B	B	A	A	A	B	B	-	A	A	A	A	A	A	B	A	B	A	A	A	A	A	B	B	A	A	B	B	B	B	B	B	A	A	B	A	B	A
BS00184409	1D	56.7	B	B	B	B	-	A	A	A	A	B	B	A	A	A	B	B	-	A	A	A	A	A	A	B	A	B	A	A	A	A	A	B	B	A	A	B	B	B	B	B	-	A	A	B	A	-	A
BS00185118	1D	56.7	B	B	B	B	A	A	A	A	A	B	B	A	A	A	B	B	-	A	A	A	A	A	A	B	A	B	A	A	A	A	A	B	B	A	A	B	B	B	B	B	B	A	A	B	A	B	A
BS00185119	1D	56.7	B	B	B	B	A	A	A	A	A	B	B	A	A	A	B	B	-	A	A	A	A	A	A	B	A	B	A	A	A	A	A	B	B	A	A	B	B	B	B	B	B	A	A	B	A	B	A
BS00185667	1D	56.7	B	B	B	B	A	A	A	A	A	B	B	A	A	A	B	B	-	A	A	A	A	A	A	B	A	B	A	A	A	A	A	B	B	A	A	B	B	B	B	B	B	A	A	B	A	B	A
protGluD1LM	1D	56.7	B	B	B	B	A	A	A	A	A	B	B	A	A	A	B	B	A	A	A	A	A	A	A	B	A	B	A	A	A	A	A	B	B	A	-	B	B	B	B	B	B	A	A	B	A	B	A
BS00003558	1D	57.3	B	A	B	B	A	A	A	A	A	B	B	A	A	A	B	B	A	-	A	A	A	A	A	-	A	B	A	A	A	A	A	B	B	A	A	B	B	-	B	B	B	A	A	B	A	B	A
BS00004282	1D	57.3	B	B	B	B	A	A	A	A	A	B	B	A	A	A	B	B	A	-	-	A	A	A	A	-	A	B	A	A	A	A	A	B	B	A	A	B	B	-	B	B	B	A	A	B	A	B	A
BS00011310	1D	57.3	-	B	B	B	A	A	A	-	A	B	B	A	A	A	B	B	A	-	A	A	-	A	A	-	A	B	A	A	A	A	A	B	B	A	A	B	B	-	B	B	B	A	A	B	A	B	A
BS00021690	1D	57.3	-	B	B	B	A	A	A	A	A	B	B	A	A	A	B	B	A	-	A	A	A	A	A	-	A	B	A	A	A	A	A	B	B	A	A	B	B	-	B	B	B	A	A	B	A	B	A
BS00021702	1D	57.3	B	A	B	B	A	A	A	A	A	B	B	A	A	A	B	B	A	-	A	A	A	-	A	-	A	B	A	-	A	A	A	B	B	A	A	B	-	-	B	B	-	A	A	B	A	-	A
BS00022334	1D	57.3	B	B	B	B	A	A	A	-	A	B	B	A	A	A	B	B	-	A	A	A	A	A	A	B	A	B	A	A	A	A	A	B	B	A	A	B	B	B	B	B	-	A	A	-	A	B	A
BS00022623	1D	57.3	B	-	B	B	A	A	A	A	A	B	B	A	A	A	B	B	A	A	A	A	A	A	-	B	A	B	A	A	A	A	A	B	B	A	A	B	B	B	B	B	B	A	A	A	A	B	A
BS00022768	1D	57.3	B	B	B	B	A	A	A	A	A	B	B	A	A	A	B	B	A	A	A	A	A	A	A	B	A	B	A	A	A	A	A	B	B	A	A	B	B	B	B	B	-	A	A	A	A	B	A
BS00024080	1D	57.3	B	A	B	B	A	A	-	A	A	-	B	A	A	A	B	B	-	A	A	A	A	A	A	B	A	B	A	A	A	A	A	B	B	A	A	B	B	B	B	B	B	A	A	B	A	B	A
BS00024081	1D	57.3	B	A	B	B	A	A	A	A	A	B	B	A	A	A	B	B	-	A	A	A	A	A	A	B	A	-	A	A	A	A	A	B	B	A	A	B	B	B	B	B	B	A	A	B	A	B	A
BS00030251	1D	57.3	B	B	B	B	A	A	A	A	A	B	B	A	A	A	B	B	-	A	A	A	A	A	A	B	A	B	A	A	A	A	A	B	B	A	A	B	B	B	B	B	B	A	A	B	A	B	A
BS00030252	1D	57.3	B	-	B	B	A	A	A	A	A	B	B	A	A	A	B	B	-	A	A	A	A	A	A	B	A	B	A	A	A	A	A	B	B	A	A	B	B	B	B	B	B	A	A	B	A	B	A
BS00031152	1D	57.3	B	B	B	B	-	A	A	A	A	B	B	-	A	A	B	B	-	A	A	A	A	A	A	B	A	B	A	A	A	A	A	B	B	A	A	-	-	B	B	-	-	A	A	B	A	-	A
BS00066188	1D	57.3	B	A	B	B	A	A	A	A	A	B	B	A	A	A	B	B	-	A	A	A	A	A	A	B	A	B	A	A	A	A	A	B	B	A	A	B	B	B	B	B	B	A	A	B	A	B	A
BS00075001	1D	57.3	B	A	B	B	-	A	A	A	A	B	B	A	A	A	B	B	-	A	A	A	A	A	A	B	A	B	A	A	A	A	A	B	B	A	A	B	B	B	B	B	B	A	A	B	A	-	A
BS00079095	1D	57.3	B	B	B	B	A	A	A	A	A	B	B	A	A	A	B	B	-	A	A	A	A	A	A	B	A	B	A	A	A	A	A	B	B	A	A	B	B	B	B	B	-	A	A	B	A	B	A
BS00115707	1D	57.3	B	A	B	B	A	A	A	A	A	B	B	A	A	A	B	B	-	A	A	-	A	A	A	B	A	-	A	A	A	A	A	B	B	A	A	-	B	B	B	-	-	A	A	B	A	B	A
BS00127795	1D	57.3	B	-	-	B	A	A	A	A	-	B	B	A	A	A	B	B	-	A	A	A	A	A	A	B	A	B	A	A	A	A	A	-	B	A	A	B	B	B	B	B	B	A	A	-	A	B	-
BS00128444	1D	57.3	B	B	B	B	A	A	A	A	A	B	B	A	A	A	B	B	-	A	A	-	A	A	A	B	A	B	A	A	A	A	A	B	B	A	A	B	B	B	B	B	B	A	A	B	A	B	A
BS00136464	1D	57.3	B	A	B	B	A	A	A	A	A	B	B	A	A	A	B	B	-	A	A	A	A	A	A	B	A	B	A	A	A	A	A	B	B	A	A	B	B	B	B	B	B	A	A	B	A	B	A
BS00183367	1D	57.3	B	B	B	B	A	A	A	A	A	B	B	A	A	A	B	B	-	A	A	A	A	A	A	B	A	B	A	A	A	A	A	B	B	A	A	B	B	B	B	B	B	A	A	B	A	B	A
BS00183728	1D	57.3	B	A	B	B	A	A	A	A	A	B	B	A	A	A	B	B	-	A	A	A	A	A	A	B	A	B	A	A	A	A	A	B	B	A	A	B	B	B	B	B	B	A	A	B	A	B	A
BS00183729	1D	57.3	B	A	B	B	A	A	A	A	A	B	B	A	A	A	B	B	-	A	A	A	A	A	A	B	A	B	A	A	A	A	A	B	B	A	A	B	B	B	B	B	B	A	A	B	A	B	A
BS00185380	1D	57.3	B	A	B	B	A	A	A	A	A	B	B	A	A	A	B	B	-	A	A	A	A	A	A	B	A	B	A	A	A	A	A	B	B	A	A	B	B	B	B	B	B	A	A	B	A	B	A
wMAS000014_GluD1	1D	57.3	B	B	B	B	A	A	A	A	A	B	B	A	A	A	B	B	-	A	A	A	A	A	A	B	A	B	A	A	A	A	A	B	B	A	A	B	B	B	B	B	-	A	A	B	A	B	-
wPt-3743	1D	57.3	B	B	B	B	A	A	A	A	A	B	B	A	A	A	B	B	A	A	A	A	A	A	A	B	A	B	A	A	A	A	A	B	B	A	-	B	B	B	B	B	-	A	A	B	A	B	A
BS00003559	1D	57.8	B	A	B	B	A	A	A	A	A	B	B	A	A	A	B	B	A	-	A	A	A	A	A	-	A	B	A	A	A	A	A	B	B	A	A	B	B	-	B	B	B	A	A	B	A	B	A
BS00018250	1D	57.8	B	A	B	B	A	A	A	-	A	B	B	A	A	A	B	B	A	-	A	A	A	A	A	-	A	B	A	-	A	A	A	B	B	A	A	B	-	-	B	B	B	A	A	B	A	-	A
BS00131465	1D	57.8	B	A	-	B	A	A	A	A	A	B	B	A	A	A	B	B	-	A	A	-	A	A	A	B	A	B	A	A	A	A	A	B	B	A	A	B	B	B	B	B	B	A	A	B	A	B	-
BS00131707	1D	57.8	B	A	B	B	A	A	A	A	A	B	B	A	A	A	B	B	-	A	-	-	A	A	A	-	A	B	A	A	A	A	A	B	B	A	A	B	B	B	B	B	B	-	A	B	A	B	A
BS00139872	1D	57.8	B	A	B	B	A	A	A	A	A	B	B	A	A	A	B	B	-	A	A	A	A	A	A	B	A	B	A	A	A	A	A	B	B	A	A	B	B	B	B	B	B	A	A	B	A	B	A
BS00147607	1D	57.8	B	A	B	-	A	A	A	A	A	B	B	A	A	A	B	B	-	A	A	A	A	A	A	B	A	B	A	A	A	A	A	B	B	A	A	-	B	B	B	B	B	A	A	B	A	B	A
BS00161646	1D	57.8	B	A	B	B	A	A	A	A	A	B	B	A	A	A	B	B	-	A	A	A	A	A	A	B	A	B	A	A	A	A	A	B	B	A	A	B	B	B	B	B	B	A	A	B	A	B	A
BS00165414	1D	57.8	B	A	B	B	A	A	A	A	A	B	B	A	A	A	B	B	-	A	A	A	A	A	A	B	A	B	A	A	A	A	A	B	B	A	A	-	B	B	B	B	B	A	A	B	A	B	A
BS00180935	1D	57.8	B	A	B	B	A	A	A	A	A	B	B	A	A	A	B	B	-	A	A	A	A	A	A	B	A	B	A	A	A	A	A	B	B	A	A	B	B	B	B	B	B	A	A	B	A	B	A
BS00181493	1D	57.8	B	A	B	B	A	A	A	A	A	B	B	A	A	A	B	B	-	A	A	A	A	A	A	B	A	B	A	A	A	A	A	B	B	A	A	B	B	B	B	B	B	A	A	B	A	-	A
BS00073257	1D	61.2	B	A	B	B	A	A	A	A	A	B	B	A	A	A	B	B	-	A	A	A	A	A	A	B	A	B	A	A	A	A	A	B	B	A	A	B	B	B	B	B	B	A	A	B	B	B	A
BS00003816	1D	61.7	B	A	B	B	A	A	A	A	A	B	B	A	A	A	B	B	A	-	A	A	A	A	A	-	A	B	A	A	A	A	A	B	B	A	A	B	B	-	B	B	B	A	A	-	B	B	A
BS00040568	1D	61.7	B	A	B	B	A	A	A	A	A	B	B	A	A	A	B	B	-	A	A	A	A	A	A	B	A	B	A	A	A	A	A	B	B	A	A	B	B	B	B	B	B	A	A	B	B	B	A
BS00117238	1D	61.7	B	A	B	B	A	A	A	A	A	B	B	A	A	A	B	B	-	A	A	A	A	A	A	B	A	B	A	A	A	A	A	B	B	A	A	B	B	B	B	B	B	A	A	B	B	B	A
BS00182403	1D	61.7	B	A	B	B	A	A	A	A	A	-	B	A	A	A	B	B	-	A	A	A	A	A	A	B	A	B	A	A	A	A	A	B	B	A	A	B	B	B	B	B	B	A	A	B	B	B	A
BS00182404	1D	61.7	B	A	B	B	A	A	A	A	A	A	B	A	A	A	B	B	-	A	A	A	A	A	A	B	A	B	A	A	A	A	A	B	B	A	A	B	B	B	B	B	B	A	A	B	B	B	A
BS00182405	1D	61.7	B	A	B	B	A	A	A	A	A	A	B	A	A	A	B	B	-	A	A	A	A	A	A	B	A	B	A	A	A	A	A	-	B	A	A	B	B	B	B	B	-	A	A	B	B	B	A
BS00022041	1D	62.4	-	A	B	-	-	A	A	A	A	A	-	A	A	A	B	B	A	A	A	A	A	A	A	B	-	B	-	A	A	A	A	B	-	A	A	-	-	B	B	B	B	A	A	A	-	-	A
BS00123737	1D	70.6	B	A	-	-	A	A	A	A	A	A	B	A	A	A	B	B	-	A	A	A	A	A	A	B	A	B	A	A	A	A	A	B	B	B	A	A	B	B	-	B	B	A	A	-	B	B	A
BS00022188	1D	79.2	B	A	A	-	A	A	A	A	B	A	-	B	B	A	B	B	A	A	A	-	A	A	A	B	A	B	A	A	A	A	A	A	B	B	A	A	B	B	B	B	B	A	A	A	B	-	B
gdm111	1D	105.8	B	A	A	B	A	A	B	B	A	A	B	B	B	A	B	A	A	A	A	A	A	A	A	B	A	B	A	A	B	-	B	B	-	-	-	A	A	-	B	A	A	B	-	-	-	-	-
BS00009412	1D	107.1	B	A	-	B	A	A	B	B	A	A	B	B	B	A	B	A	A	-	A	A	A	A	A	-	A	B	A	A	B	A	B	B	A	B	A	A	A	-	B	A	A	B	A	B	B	B	A
BS00003725	1D	107.7	B	A	B	B	A	A	B	B	A	A	B	B	B	A	B	A	A	-	-	A	A	A	A	-	A	B	A	A	B	A	B	B	A	B	A	A	A	-	B	A	A	B	A	B	B	A	A
BS00009625	1D	107.7	-	A	B	B	A	A	-	B	A	A	B	B	B	A	B	A	A	-	-	A	A	A	A	-	A	B	A	A	B	A	B	B	A	B	A	A	A	-	B	A	A	B	A	B	B	A	A
BS00010248	1D	107.7	B	A	B	B	A	A	B	B	A	A	B	B	B	A	B	A	A	-	A	A	A	A	A	-	A	B	A	A	B	A	B	B	A	B	A	A	A	-	B	A	A	B	A	B	B	-	A
BS00010402	1D	107.7	B	A	B	B	A	A	B	B	A	A	B	B	B	A	B	A	A	-	-	A	A	A	A	-	A	B	A	A	B	A	B	B	A	B	A	-	A	-	B	A	A	B	A	B	B	A	A
BS00010498	1D	107.7	B	A	B	B	A	A	B	B	A	A	B	B	B	A	B	A	A	-	-	A	A	A	A	-	A	B	A	A	B	A	B	B	A	B	A	A	A	-	B	A	A	B	A	B	B	A	A
BS00010528	1D	107.7	B	A	B	B	A	-	B	B	A	-	B	B	-	-	B	A	A	-	A	A	-	-	A	-	A	B	A	A	-	-	B	B	-	-	A	A	A	-	B	-	A	B	A	-	B	A	A
BS00010713	1D	107.7	B	A	B	B	A	A	B	B	A	A	B	B	B	A	B	A	A	-	-	A	A	A	A	-	A	B	A	A	B	A	B	B	A	B	A	A	A	-	B	A	A	B	A	B	B	A	A
BS00011168	1D	107.7	-	A	B	B	A	A	B	B	A	A	B	B	B	A	B	A	A	-	A	A	A	A	A	-	A	B	A	A	B	A	B	B	A	B	A	A	A	-	B	A	A	B	A	B	B	A	A
BS00020023	1D	107.7	B	A	-	B	A	A	B	B	A	A	B	B	B	A	B	A	-	A	A	A	A	A	A	A	A	B	A	A	B	A	B	B	A	B	A	A	A	A	B	A	A	B	A	B	B	A	A
BS00024035	1D	107.7	B	A	B	B	A	A	B	B	A	A	B	B	B	A	B	A	-	A	A	A	A	A	A	A	A	B	A	A	B	A	B	B	A	B	A	A	A	A	B	A	A	B	A	B	B	A	A
BS00024089	1D	107.7	B	A	B	B	A	A	B	B	A	A	B	B	B	A	B	A	-	A	A	A	A	A	A	A	A	B	A	A	B	A	B	B	A	B	A	A	A	A	B	A	A	B	A	B	B	-	-
BS00036558	1D	107.7	B	A	B	B	A	A	B	B	A	A	B	B	B	A	B	A	-	A	A	A	A	A	A	A	A	B	A	A	B	A	B	B	A	B	A	A	A	A	B	A	A	-	A	B	B	A	A
BS00063511	1D	107.7	B	A	B	-	A	A	B	B	A	A	B	B	B	A	B	A	-	A	A	A	A	A	A	A	A	B	A	A	B	A	B	B	A	B	A	-	A	A	B	A	A	B	A	B	B	A	A
BS00089269	1D	107.7	B	A	B	B	A	A	B	B	-	A	B	B	B	A	B	A	-	A	A	A	A	A	A	A	A	-	A	A	B	A	B	B	A	B	A	A	A	A	B	A	A	B	A	B	B	A	A
BS00112685	1D	107.7	B	A	B	B	A	A	B	B	A	A	B	B	B	A	B	A	-	A	A	A	A	A	A	A	A	B	A	A	B	A	B	B	A	B	A	A	A	A	B	A	A	B	A	B	B	A	A
BS00117194	1D	107.7	B	A	B	B	A	A	B	B	A	A	B	B	B	A	B	A	-	A	A	A	A	A	A	A	A	B	A	A	B	A	B	B	A	B	A	A	A	A	B	A	A	B	A	B	B	A	-
BS00123540	1D	107.7	B	A	B	B	A	A	B	B	A	A	B	B	B	A	B	A	-	A	A	A	A	A	A	-	A	B	A	A	B	A	B	B	A	B	A	A	A	A	B	A	A	B	A	B	B	A	A
BS00126039	1D	107.7	B	A	B	B	A	A	B	B	-	A	B	B	B	A	B	A	-	A	A	A	A	A	A	A	A	-	A	A	B	A	B	B	A	B	A	A	A	A	B	A	A	B	A	B	B	A	A
BS00126732	1D	107.7	B	-	B	B	A	-	B	B	A	A	B	B	-	A	B	A	-	A	-	-	A	A	-	A	A	B	A	A	B	A	B	B	A	B	A	A	A	A	B	A	-	-	A	B	B	A	A
BS00129163	1D	107.7	B	A	B	B	A	A	B	B	A	A	B	B	B	A	B	A	-	A	A	A	A	A	A	A	A	B	A	A	B	A	B	B	A	B	A	A	A	A	B	A	A	B	A	B	B	A	A
BS00129772	1D	107.7	B	A	B	B	A	A	B	B	A	A	B	B	B	A	B	A	-	A	A	A	A	A	A	A	A	B	A	A	B	A	B	B	A	-	A	A	A	A	B	A	A	B	A	B	B	A	A
BS00132062	1D	107.7	B	A	B	B	A	A	B	B	A	A	B	B	B	A	B	A	-	A	A	A	A	A	A	A	A	B	A	A	B	A	B	B	A	B	A	A	A	A	B	A	A	B	A	B	B	A	A
BS00133553	1D	107.7	B	A	B	B	A	A	B	B	A	A	B	B	B	A	B	A	-	A	A	A	A	A	A	A	A	B	A	A	B	A	B	B	A	B	A	A	A	A	B	A	A	B	A	B	B	A	A
BS00151323	1D	107.7	B	A	-	-	A	A	B	B	A	A	B	B	B	A	B	A	-	A	A	-	A	A	A	A	A	B	A	A	B	A	B	B	A	B	A	A	A	A	B	A	-	B	A	B	B	A	-
BS00152826	1D	107.7	B	A	B	B	A	A	B	B	A	A	B	B	B	A	B	A	-	A	A	A	A	A	A	A	-	B	A	A	B	A	B	B	A	B	A	A	A	A	B	A	A	B	A	B	B	A	A
BS00153717	1D	107.7	B	-	B	B	A	-	B	B	-	A	B	B	-	A	B	A	-	A	-	-	-	A	-	A	A	B	A	A	B	A	B	B	A	-	A	A	A	A	B	A	-	-	A	B	-	A	A
BS00154471	1D	107.7	B	A	B	B	A	A	B	B	A	A	B	B	B	A	B	A	-	A	A	A	A	A	A	A	A	B	A	A	B	A	B	B	A	B	A	A	A	A	B	A	A	B	A	B	B	A	A
BS00156722	1D	107.7	B	A	B	B	A	A	B	B	A	A	B	B	B	A	B	A	-	A	A	A	A	A	A	A	A	B	A	A	B	A	B	B	A	B	A	A	A	A	B	A	A	B	A	B	B	A	A
BS00158479	1D	107.7	B	A	B	B	A	A	B	B	A	A	B	B	B	A	B	A	-	A	A	A	A	A	A	A	A	B	A	A	B	A	B	B	A	B	A	A	A	A	B	A	A	B	A	B	B	A	A
BS00160033	1D	107.7	B	A	B	B	A	A	B	B	A	A	B	B	B	A	B	A	-	A	A	A	A	A	A	A	A	B	A	A	B	A	B	B	A	B	A	A	A	A	B	A	A	B	A	B	B	A	A
BS00164465	1D	107.7	B	A	B	B	A	A	B	B	A	A	B	B	B	A	B	A	-	A	A	A	A	A	A	A	A	B	A	A	B	A	B	B	A	B	A	A	A	A	B	A	A	B	A	B	B	A	A
BS00164956	1D	107.7	B	A	B	B	A	A	B	B	A	A	B	B	B	A	B	A	-	A	A	A	A	A	A	A	A	B	A	A	B	A	B	B	A	B	A	A	A	A	B	A	A	B	A	B	B	A	A
BS00166212	1D	107.7	B	A	B	B	A	A	B	B	A	A	B	B	B	A	B	A	-	A	A	A	A	A	A	A	A	B	A	A	B	A	B	B	A	B	A	A	A	A	B	A	A	B	A	B	B	A	-
BS00166666	1D	107.7	B	A	B	B	A	A	B	B	A	A	B	B	B	A	B	A	-	A	A	A	A	-	A	A	A	B	-	A	B	A	B	B	A	B	A	A	A	A	B	A	A	B	A	B	B	A	A
BS00166950	1D	107.7	B	A	B	B	A	-	B	B	A	A	B	B	B	A	B	A	-	A	A	A	A	A	A	A	A	B	A	A	B	A	B	B	A	B	A	A	A	A	B	A	A	B	A	B	B	-	-
BS00168014	1D	107.7	B	A	B	B	A	A	B	B	A	A	B	B	B	A	B	A	-	A	A	A	A	A	A	A	A	B	A	A	B	A	-	B	A	-	A	A	A	A	B	A	A	B	A	B	B	A	-
BS00179466	1D	107.7	B	A	B	B	A	A	B	B	A	A	B	B	B	A	B	A	-	A	A	A	A	A	A	A	A	B	A	A	B	A	B	B	A	B	A	A	A	A	B	A	A	B	A	B	B	A	A
BS00183152	1D	107.7	B	A	B	B	A	A	B	B	A	A	B	B	B	A	B	A	-	A	A	A	A	A	A	A	A	B	A	A	B	A	B	B	A	B	A	A	A	A	B	A	A	B	A	B	B	A	A
BS00185872	1D	107.7	B	A	B	B	A	A	B	B	A	A	B	B	B	A	B	A	-	A	A	A	A	A	A	A	A	B	-	A	B	A	B	B	A	B	A	A	A	A	B	A	A	B	A	B	B	A	A
BS00000424	1D	108.2	B	A	B	B	A	A	B	B	A	A	B	B	B	A	B	A	A	-	-	A	A	A	A	-	A	B	A	A	B	A	B	B	A	B	A	A	A	-	B	A	A	B	A	B	B	A	A
BS00003573	1D	108.2	B	A	B	B	A	A	B	B	A	A	B	B	B	A	-	A	A	-	-	A	A	A	A	-	A	B	A	A	B	A	B	B	A	B	A	A	A	-	B	A	A	B	A	B	B	A	A
BS00003687	1D	108.2	B	A	B	B	A	A	B	B	A	A	B	B	B	A	B	A	A	-	A	A	A	A	A	-	A	B	A	A	B	A	B	B	A	B	A	A	A	-	B	A	A	B	A	B	B	A	A
BS00004769	1D	108.2	B	A	B	B	A	A	B	B	A	A	B	B	B	A	B	A	-	A	A	A	A	A	A	A	A	B	A	A	B	A	B	B	A	B	A	A	A	A	B	A	A	B	A	B	B	A	A
BS00009375	1D	108.2	B	A	B	B	A	A	B	B	A	A	B	B	B	A	B	A	A	-	-	A	-	A	A	-	A	B	A	A	B	A	B	B	A	B	A	A	A	-	B	A	A	B	A	B	B	A	A
BS00009389	1D	108.2	B	A	B	B	A	A	B	B	A	A	B	B	B	A	B	A	A	-	-	A	A	A	A	-	A	B	A	A	B	A	B	B	A	B	A	A	A	-	B	A	A	B	A	B	B	A	A
BS00010669	1D	108.2	B	A	B	B	A	A	B	B	A	A	B	B	B	A	B	A	A	-	-	A	A	A	A	-	A	B	A	A	B	A	B	B	A	B	A	A	A	-	B	A	A	B	A	B	B	A	A
BS00010807	1D	108.2	B	A	B	B	A	A	B	B	A	A	B	B	B	A	B	A	A	-	A	A	A	A	A	-	A	B	A	A	B	A	B	B	A	B	A	A	A	-	B	A	A	B	A	B	B	A	-
BS00010851	1D	108.2	-	A	B	B	A	A	B	-	A	A	B	B	B	A	B	A	A	-	A	A	A	A	A	-	A	B	A	A	B	A	B	B	A	B	A	A	A	-	B	A	A	B	A	B	B	A	A
BS00010946	1D	108.2	B	A	B	B	A	A	B	B	A	A	B	B	B	A	B	A	A	-	A	A	A	A	A	-	A	B	A	A	B	A	B	B	A	B	A	A	A	-	B	A	A	B	A	B	B	A	A
BS00011041	1D	108.2	B	A	B	B	A	A	B	B	A	A	B	B	B	A	B	A	A	-	A	A	A	A	A	-	A	B	A	A	B	A	B	B	A	B	A	A	A	-	B	A	A	B	A	B	B	A	A
BS00011292	1D	108.2	B	A	B	B	A	A	B	B	A	A	B	B	B	A	B	A	A	-	A	A	A	A	A	-	A	B	A	A	B	A	B	B	A	B	A	A	A	-	B	A	A	B	A	B	B	A	A
BS00011672	1D	108.2	B	A	B	B	A	A	B	B	A	A	B	B	B	A	B	A	A	-	A	A	A	A	A	-	A	B	A	A	B	A	B	B	A	B	A	A	A	-	B	A	A	B	A	B	B	A	A
BS00011947	1D	108.2	-	A	B	B	A	A	B	B	A	A	B	B	B	A	B	A	A	-	A	A	A	A	A	-	A	B	A	A	B	A	B	B	A	B	A	A	A	-	B	A	A	B	A	B	B	A	A
BS00024033	1D	108.2	B	A	B	B	A	A	B	B	A	A	B	B	B	A	B	A	-	-	A	A	A	A	A	A	A	B	A	A	B	A	B	B	A	B	A	A	A	A	B	A	A	-	A	B	B	A	A
BS00033776	1D	108.2	B	A	B	-	A	A	B	B	A	A	B	B	B	A	B	A	-	A	A	A	A	A	A	A	A	B	A	A	B	A	B	B	A	B	A	A	A	A	B	A	A	B	A	B	B	A	A
BS00063255	1D	108.2	B	A	B	B	A	A	B	B	A	A	B	B	B	A	B	A	-	A	A	A	A	A	A	A	A	B	A	A	B	A	B	B	A	B	A	A	A	A	B	A	A	-	A	B	B	A	A
BS00065891	1D	108.2	B	A	B	B	A	A	B	B	A	A	B	B	B	A	B	A	-	A	A	A	A	A	A	A	A	B	A	A	B	A	B	B	A	B	A	A	A	A	B	A	-	B	A	B	B	-	A
BS00066805	1D	108.2	B	A	B	B	A	A	B	B	A	A	B	B	B	A	B	A	-	A	A	A	A	-	A	A	A	B	A	A	B	A	B	B	A	B	A	A	A	A	B	A	A	B	A	B	B	A	A
BS00082597	1D	108.2	B	A	B	B	A	A	B	B	A	A	B	B	B	A	B	A	-	A	A	A	A	A	A	A	A	B	A	A	B	A	B	B	A	B	A	A	A	A	B	A	A	B	A	B	B	A	A
BS00089094	1D	108.2	B	A	B	B	A	A	B	B	A	A	B	B	B	A	B	A	-	A	A	A	A	A	A	A	A	B	A	A	B	A	B	B	A	B	A	A	A	A	B	A	-	B	A	B	B	A	A
BS00092888	1D	108.2	B	A	-	-	A	-	B	B	A	A	B	B	B	A	B	A	-	A	A	A	A	A	A	A	A	B	A	A	B	A	B	B	A	B	A	A	A	A	B	A	-	B	A	B	B	A	-
BS00092890	1D	108.2	B	A	B	-	A	A	B	B	A	A	B	B	B	A	B	A	-	A	A	A	A	A	A	A	A	B	A	A	B	A	B	B	A	B	A	A	A	A	B	A	A	B	A	B	B	A	A
BS00093274	1D	108.2	B	A	B	B	A	-	B	-	A	A	B	B	B	A	B	A	-	A	A	A	A	A	A	A	A	B	A	A	B	A	B	B	A	B	A	A	A	A	B	A	A	B	A	B	B	A	A
BS00099705	1D	108.2	B	A	B	B	A	A	B	B	A	A	B	B	B	A	B	A	-	A	A	A	A	A	A	A	A	B	A	A	B	A	B	B	A	B	A	-	-	A	B	-	A	B	A	B	B	A	A
BS00111482	1D	108.2	B	A	B	B	A	A	B	B	A	A	B	B	B	A	B	A	-	A	A	A	A	A	A	A	A	B	A	A	B	A	B	B	A	B	A	A	A	A	B	A	A	B	A	B	B	A	A
BS00112684	1D	108.2	B	A	B	B	B	A	B	B	A	A	B	B	B	A	B	A	-	A	A	A	A	A	A	A	A	B	A	A	B	A	B	B	A	B	A	A	A	A	B	A	A	B	A	B	B	A	A
BS00112931	1D	108.2	B	A	-	-	-	A	B	B	A	A	B	B	B	A	B	A	-	A	A	A	A	A	A	A	A	B	-	A	B	A	B	B	A	B	A	A	A	A	B	A	-	B	A	B	B	A	-
BS00113439	1D	108.2	B	A	B	B	A	A	B	B	A	A	B	B	B	A	B	A	-	A	A	A	A	A	A	A	A	B	A	A	B	A	B	B	A	B	A	A	A	A	B	A	-	B	A	B	B	A	A
BS00114054	1D	108.2	B	A	B	B	A	A	B	B	A	A	B	B	B	A	B	A	-	A	A	A	A	-	A	A	A	B	A	A	B	A	B	B	A	-	A	A	A	A	B	A	-	B	A	B	B	A	A
BS00114846	1D	108.2	B	A	B	-	A	A	B	B	A	A	B	B	B	A	B	A	-	A	A	A	A	A	A	A	A	B	A	A	B	A	B	B	A	B	A	A	A	A	B	A	A	B	A	B	B	A	A
BS00115705	1D	108.2	B	A	B	B	A	A	B	B	A	A	B	B	B	A	B	A	-	A	A	A	A	A	A	A	A	B	A	A	B	A	B	B	A	-	A	A	A	A	B	A	A	B	A	B	B	A	A
BS00115907	1D	108.2	B	A	B	B	A	A	B	B	A	A	B	B	B	A	B	A	-	A	A	A	A	A	A	A	A	B	A	A	B	A	B	B	A	B	A	A	A	A	B	A	A	B	A	B	B	A	A
BS00121915	1D	108.2	B	A	B	-	A	A	B	B	A	A	B	B	B	A	B	A	-	-	A	A	A	-	A	A	A	B	A	A	B	A	B	B	A	B	A	A	A	A	B	A	A	-	A	B	B	A	A
BS00126040	1D	108.2	B	A	B	B	A	A	B	B	A	A	B	B	B	A	B	A	-	A	A	A	A	A	A	A	A	B	A	A	B	A	B	B	A	B	A	A	A	A	B	A	A	B	A	B	B	A	A
BS00126526	1D	108.2	B	A	B	B	-	A	B	B	A	A	B	B	B	A	B	A	-	A	A	A	A	A	A	A	A	B	A	A	B	A	B	B	A	B	A	A	A	A	B	A	A	B	A	B	B	A	A
BS00128970	1D	108.2	B	A	-	B	A	A	B	B	A	A	B	B	B	A	B	A	-	A	A	A	A	A	A	A	A	B	A	A	B	A	B	B	A	B	A	A	A	A	B	A	-	B	A	B	B	A	A
BS00128971	1D	108.2	B	A	B	B	-	A	B	B	A	A	B	B	B	A	B	A	-	A	A	A	A	A	A	A	A	B	A	A	B	A	B	B	A	B	A	A	A	A	B	A	A	B	A	B	B	A	A
BS00129771	1D	108.2	B	A	B	B	A	A	B	B	A	A	B	B	B	A	B	A	-	A	A	-	A	A	A	-	-	-	-	A	B	A	B	B	A	B	A	A	A	A	B	A	A	B	A	B	B	-	A
BS00129901	1D	108.2	B	A	B	B	A	A	B	B	A	A	B	B	B	A	B	A	-	A	A	A	A	A	A	A	A	B	A	A	B	A	B	B	A	B	A	-	A	A	B	A	-	B	A	B	B	A	A
BS00130218	1D	108.2	B	A	B	B	A	A	B	B	A	A	B	B	B	A	B	A	-	A	A	A	A	A	A	A	A	B	A	A	B	A	B	B	A	B	A	A	A	A	B	A	A	B	A	B	B	A	A
BS00130545	1D	108.2	B	A	B	B	A	A	B	B	A	A	B	B	B	A	B	A	-	A	A	A	A	A	A	A	A	B	A	A	B	A	B	B	A	B	A	A	A	A	B	A	A	B	A	B	B	A	A
BS00130815	1D	108.2	-	A	B	B	A	A	B	B	A	A	B	B	B	A	B	A	-	A	A	A	A	A	A	A	A	B	-	A	B	A	B	B	A	B	A	A	A	A	B	A	A	B	A	B	B	A	A
BS00130937	1D	108.2	B	A	B	B	A	A	B	B	A	A	B	B	B	A	B	A	-	A	A	-	A	A	A	A	A	B	A	A	B	A	B	B	A	B	A	A	A	A	B	A	A	-	A	B	B	A	A
BS00131628	1D	108.2	B	A	B	B	A	A	B	B	A	A	B	B	B	A	B	A	-	A	A	A	A	A	A	A	A	B	A	A	B	A	B	B	A	B	A	A	A	A	B	A	A	B	A	B	B	A	A
BS00132072	1D	108.2	B	A	B	B	A	A	B	B	A	A	B	B	B	A	B	A	-	A	A	A	-	A	A	A	A	B	A	A	B	A	B	B	A	B	A	A	A	A	B	A	A	B	A	B	B	A	A
BS00132330	1D	108.2	B	A	B	B	A	A	B	B	A	A	B	B	B	A	B	A	-	A	A	A	A	A	A	A	A	B	A	A	B	A	B	B	A	B	A	A	A	A	B	A	A	B	A	B	B	A	A
BS00132625	1D	108.2	B	A	B	B	A	A	B	B	A	A	B	B	B	A	B	A	-	A	A	A	A	A	A	A	A	B	A	A	B	A	B	B	A	B	A	A	A	A	B	A	A	B	A	B	B	A	A
BS00132846	1D	108.2	B	A	B	B	A	A	B	B	A	A	B	-	B	A	B	A	-	A	A	A	A	A	A	A	A	B	A	A	B	A	B	B	A	B	A	-	A	A	B	A	B	B	A	B	B	A	A
BS00132986	1D	108.2	B	A	B	B	A	A	B	B	A	A	B	B	B	A	B	A	-	A	A	A	A	A	A	A	A	B	A	A	B	A	B	B	A	B	A	A	A	A	B	A	A	B	A	B	B	A	A
BS00134133	1D	108.2	B	A	B	B	A	A	B	B	A	A	B	B	B	A	B	A	-	A	A	A	A	A	A	A	A	B	A	A	B	A	B	B	A	B	A	A	-	A	B	A	A	B	A	B	B	A	A
BS00134140	1D	108.2	B	A	B	B	A	A	B	B	A	A	B	B	B	A	B	A	-	A	A	A	A	A	A	A	A	B	A	A	B	A	B	B	A	B	A	A	A	A	B	A	A	B	A	B	B	A	A
BS00134536	1D	108.2	B	A	B	-	A	A	B	B	A	A	B	B	B	A	B	A	-	A	A	A	A	A	A	A	-	B	-	A	B	A	-	B	A	B	A	A	A	A	B	A	A	B	A	B	B	A	A
BS00139650	1D	108.2	B	A	B	B	A	A	B	B	A	A	B	B	B	A	B	A	-	-	A	A	A	-	A	A	-	B	A	A	B	A	B	B	A	B	A	-	A	A	B	A	A	B	A	B	B	A	A
BS00139685	1D	108.2	B	A	B	B	A	A	B	B	A	A	B	B	B	A	B	A	-	A	A	A	A	A	A	A	A	B	A	A	B	A	B	B	A	B	A	A	A	A	B	A	A	B	A	B	B	A	A
BS00140392	1D	108.2	B	A	B	B	A	A	B	B	A	A	B	B	B	A	B	A	-	A	A	A	A	A	A	A	A	B	A	A	B	A	B	B	A	B	A	A	A	A	B	A	A	B	A	B	B	-	A
BS00140569	1D	108.2	B	A	B	B	A	A	B	B	A	A	B	B	B	A	B	A	-	A	A	A	A	A	A	A	A	B	A	A	B	A	B	B	A	B	A	A	A	A	B	A	A	B	A	B	B	A	A
BS00140739	1D	108.2	B	A	B	B	A	A	B	B	A	A	B	B	B	A	B	A	-	A	A	A	A	A	A	A	A	B	A	A	B	A	B	B	A	B	A	-	A	A	B	A	A	B	A	B	B	A	A
BS00145706	1D	108.2	B	A	B	B	A	A	B	B	A	A	B	B	B	A	B	A	-	A	A	A	A	A	A	A	A	B	A	A	B	A	B	B	A	B	A	A	A	A	B	A	A	B	A	B	B	A	A
BS00146856	1D	108.2	B	A	B	B	A	A	B	B	A	A	B	B	B	A	B	A	-	A	A	A	A	A	A	A	A	B	A	A	B	A	B	B	A	B	A	A	A	A	B	A	A	B	A	B	B	A	A
BS00149367	1D	108.2	B	A	B	B	A	A	B	B	A	A	B	B	B	A	B	A	-	A	A	A	A	A	A	A	A	B	A	A	B	A	B	B	A	B	A	A	A	A	B	A	A	B	A	B	B	A	A
BS00149368	1D	108.2	B	A	B	B	A	A	B	B	A	A	B	B	B	A	B	A	-	A	A	A	A	A	A	A	A	B	A	A	B	A	B	B	A	B	A	A	A	A	B	A	A	B	A	B	B	A	A
BS00151490	1D	108.2	B	A	B	B	A	A	B	B	A	A	B	B	B	A	B	A	-	A	A	A	A	A	A	A	A	B	A	A	B	A	B	B	A	B	A	A	A	A	B	A	B	B	A	B	B	A	A
BS00151790	1D	108.2	B	A	B	B	A	A	B	B	A	A	B	B	B	A	B	A	-	A	A	A	A	A	A	A	-	A	A	A	-	A	B	B	A	B	A	A	A	A	B	A	A	B	A	B	B	A	A
BS00152440	1D	108.2	B	A	B	B	A	A	B	B	A	A	B	B	B	A	B	A	-	A	A	A	A	A	A	A	A	B	A	A	B	A	B	B	A	B	A	A	A	A	B	A	A	B	A	B	B	A	A
BS00152795	1D	108.2	B	A	B	B	A	A	B	B	A	A	B	B	B	A	B	A	-	A	A	A	A	A	A	A	A	B	A	A	B	A	B	B	A	B	A	A	A	A	B	A	A	B	A	B	B	A	A
BS00153329	1D	108.2	B	A	B	B	A	A	B	B	A	A	B	B	B	A	B	A	-	A	A	A	A	A	A	A	A	B	A	A	B	A	B	B	A	B	A	A	A	A	B	A	A	B	A	B	B	A	A
BS00153429	1D	108.2	B	A	B	B	A	A	B	B	A	A	B	B	B	A	B	A	-	A	A	A	A	A	A	A	A	B	A	A	B	A	B	B	A	B	A	A	A	A	B	A	A	B	A	B	B	A	A
BS00153716	1D	108.2	B	A	B	B	A	A	B	B	A	A	B	B	B	A	B	A	-	A	A	-	A	A	A	A	A	-	A	A	B	A	B	B	A	B	A	A	A	A	B	A	A	-	A	B	B	A	A
BS00153978	1D	108.2	B	A	B	B	A	A	B	B	A	A	B	B	B	A	B	A	-	A	A	A	A	A	A	A	A	B	A	A	B	A	B	B	A	B	A	A	A	A	B	A	A	B	A	B	B	A	A
BS00154208	1D	108.2	B	A	B	B	-	A	B	B	A	A	B	B	B	A	B	A	-	A	A	A	A	A	A	A	A	B	A	A	B	A	B	B	A	B	A	A	A	A	B	A	A	B	A	B	B	A	A
BS00154472	1D	108.2	B	A	B	B	A	A	B	B	A	A	B	B	B	A	B	A	-	A	A	A	A	A	A	A	A	B	A	A	B	A	B	B	A	B	A	A	A	A	B	A	A	B	A	B	B	A	A
BS00158480	1D	108.2	B	A	B	B	A	A	B	B	A	A	B	B	B	A	B	A	-	A	A	A	A	-	A	A	A	B	A	A	B	A	B	B	A	B	A	A	A	A	B	A	-	B	A	B	B	A	A
BS00158980	1D	108.2	B	A	B	B	A	A	B	B	A	A	B	B	B	A	B	A	-	A	A	A	A	A	A	A	A	B	A	A	B	A	B	B	A	B	A	A	A	A	B	A	B	B	A	B	B	A	A
BS00159895	1D	108.2	B	A	B	B	A	A	B	B	A	A	B	B	B	A	B	A	-	A	A	A	A	A	A	A	A	B	A	A	B	A	B	B	A	B	A	A	A	A	B	A	A	B	A	B	B	A	A
BS00159897	1D	108.2	B	A	B	B	A	A	B	B	A	A	B	B	B	A	B	A	-	A	A	A	A	A	A	A	A	B	A	A	B	A	B	B	A	B	A	A	A	A	B	A	A	B	A	B	B	A	A
BS00160150	1D	108.2	B	A	B	B	A	A	B	B	A	A	B	B	B	A	B	A	-	A	A	A	A	A	A	A	A	B	A	A	B	A	B	B	A	B	A	A	A	A	B	A	A	B	A	B	B	A	A
BS00160152	1D	108.2	B	A	B	B	A	A	B	B	A	A	B	B	B	A	B	A	-	A	A	A	A	A	A	A	A	B	A	A	B	A	B	B	A	B	A	A	A	A	B	A	A	B	A	B	B	A	A
BS00161766	1D	108.2	B	A	B	B	A	A	B	B	A	A	B	B	B	A	B	A	-	A	A	A	A	A	A	A	A	B	A	A	B	A	B	B	A	B	A	A	-	A	B	A	A	B	A	B	B	A	A
BS00162612	1D	108.2	B	A	B	B	A	A	B	B	A	A	B	B	B	A	B	A	-	A	A	A	A	A	A	A	A	B	A	A	B	A	B	B	A	B	A	A	A	A	B	A	A	B	A	B	B	A	A
BS00163232	1D	108.2	B	A	B	B	A	A	B	B	A	A	B	B	B	A	B	A	-	A	A	A	A	A	A	A	A	B	A	A	B	A	B	B	A	B	A	A	A	A	B	A	A	B	A	-	B	A	-
BS00164287	1D	108.2	B	A	B	B	A	A	B	B	A	A	B	B	B	A	B	A	-	A	A	A	A	A	A	A	A	B	A	A	B	A	B	B	A	B	A	A	A	A	B	A	A	B	A	B	B	A	A
BS00164288	1D	108.2	B	A	B	B	A	A	B	B	A	A	B	B	B	A	B	A	-	A	A	A	A	A	A	A	A	B	A	A	B	A	B	B	A	B	A	-	A	A	B	A	B	B	A	B	B	A	A
BS00164289	1D	108.2	B	A	B	B	A	A	B	B	A	A	B	B	B	A	B	A	-	A	A	A	A	A	A	A	A	B	A	A	B	A	B	B	A	B	A	A	A	A	B	A	A	B	A	B	B	A	A
BS00164751	1D	108.2	B	A	B	B	A	A	B	B	A	A	B	B	B	A	B	A	-	A	A	A	A	A	A	A	A	B	A	A	B	A	B	B	A	B	A	A	A	A	B	A	A	B	A	B	B	A	-
BS00168668	1D	108.2	B	A	B	B	A	-	B	B	A	A	B	B	B	A	B	A	-	A	A	A	A	A	A	A	A	B	A	A	B	A	B	B	A	B	A	A	A	A	B	A	A	B	A	B	B	A	A
BS00168669	1D	108.2	B	A	B	B	-	A	B	B	A	A	B	B	B	A	B	A	-	A	A	A	A	A	A	A	-	B	A	A	B	A	B	B	A	B	A	A	A	A	B	A	A	B	A	B	B	A	A
BS00168670	1D	108.2	B	A	B	B	A	A	B	B	A	A	B	B	B	A	B	A	-	A	A	A	A	A	A	A	A	B	A	A	B	A	B	B	A	B	A	A	A	A	B	A	A	B	A	B	B	A	A
BS00168671	1D	108.2	B	A	B	B	A	A	B	B	A	A	B	B	B	A	B	A	-	A	A	A	A	A	A	A	A	B	A	A	B	A	B	B	A	B	A	A	A	A	B	A	A	B	A	B	B	A	A
BS00168672	1D	108.2	B	A	B	B	A	A	B	B	A	A	B	B	B	A	B	A	-	A	A	A	A	A	A	A	A	B	A	A	B	A	B	B	A	B	A	A	A	A	B	A	A	B	A	B	B	A	A
BS00168673	1D	108.2	B	A	B	B	A	A	B	B	A	A	B	B	B	A	B	A	-	A	A	A	A	A	A	A	A	B	A	A	B	A	B	B	A	B	A	A	A	A	B	A	A	B	A	B	B	A	A
BS00168674	1D	108.2	B	A	B	B	A	A	B	B	A	A	B	B	B	A	B	A	-	A	A	A	A	A	A	A	A	B	A	A	B	A	B	B	A	B	A	A	A	A	B	A	A	B	A	B	B	A	A
BS00169238	1D	108.2	B	A	B	B	A	A	B	B	A	A	B	B	B	A	B	A	-	A	A	A	A	A	A	A	A	B	A	A	B	A	B	B	A	B	A	A	A	A	B	A	A	B	A	B	B	A	A
BS00176072	1D	108.2	B	A	B	B	A	A	B	B	A	A	B	B	B	A	B	A	-	-	A	A	A	-	-	A	-	B	A	A	B	A	B	B	A	B	A	A	A	A	B	A	-	B	A	B	B	A	A
BS00179467	1D	108.2	B	A	B	B	A	A	B	B	A	A	B	B	B	A	B	A	-	A	A	A	A	A	A	A	A	B	A	A	B	A	B	B	A	B	A	A	A	A	B	A	A	B	A	B	B	A	A
BS00179546	1D	108.2	B	A	B	B	A	A	B	B	A	A	B	B	B	A	B	A	-	A	A	A	A	A	A	A	A	B	A	A	B	A	B	B	A	B	A	A	A	A	B	A	A	B	A	B	B	A	A
BS00181481	1D	108.2	B	A	B	B	A	A	B	B	A	A	B	B	B	A	B	A	-	A	A	A	A	A	A	A	A	B	A	A	B	A	B	B	A	B	A	A	A	A	B	A	A	B	A	B	B	A	A
BS00182850	1D	108.2	B	A	B	B	A	A	B	B	A	A	B	B	B	A	B	A	-	A	A	A	A	A	A	A	A	B	A	A	B	A	B	B	A	B	A	A	A	A	B	-	A	-	A	B	B	A	A
BS00184825	1D	108.2	B	A	B	B	A	A	B	B	A	A	B	B	B	A	B	A	-	A	A	A	A	A	A	A	A	B	A	A	B	A	B	B	A	B	A	A	A	A	B	A	A	B	A	B	B	A	A
BS00185350	1D	108.2	B	A	B	B	A	A	B	B	A	A	B	B	B	A	B	A	-	A	A	A	A	A	A	A	A	B	A	A	B	A	B	B	A	B	A	A	A	A	B	A	A	B	A	B	B	A	A
wPt-6560	1D	108.8	A	A	B	-	A	A	B	B	A	A	B	B	B	A	B	A	A	A	A	A	A	A	A	-	-	B	A	A	B	A	B	B	A	B	-	A	A	A	B	A	A	B	A	B	B	-	B
BS00009377	1D	110.8	B	A	B	B	A	-	-	B	A	A	-	B	B	A	B	-	-	-	A	A	A	-	A	-	A	B	A	A	-	-	B	-	A	B	A	A	A	-	B	A	-	B	A	-	B	A	-
BS00011855	1D	110.8	-	A	B	B	A	A	A	-	A	A	B	B	B	A	B	A	A	-	A	A	-	A	A	-	A	B	A	-	B	A	B	B	A	B	A	A	-	-	B	A	A	B	A	B	-	A	A
BS00159527	1D	110.8	B	A	B	B	A	A	-	B	A	A	B	B	B	A	B	-	-	A	A	A	-	A	A	A	A	B	A	A	B	A	B	B	A	B	A	A	A	A	B	A	A	B	A	B	B	A	A
BS00159896	1D	110.8	B	A	B	B	A	A	-	B	A	A	B	B	B	A	B	-	-	A	A	A	-	A	A	A	A	B	A	A	B	A	B	B	A	B	-	A	A	A	-	A	A	B	-	B	B	A	A
wPt-2897	1D	110.8	B	A	B	B	A	A	B	B	A	-	B	B	B	A	B	A	A	A	A	A	A	A	A	A	A	-	A	A	B	A	B	B	A	B	-	A	A	A	B	A	-	B	A	B	B	A	B
wPt-4988	1D	110.8	-	A	B	-	A	A	B	B	A	A	B	B	B	A	B	A	A	A	A	A	A	A	A	A	A	B	A	A	B	A	B	B	A	B	-	A	A	A	B	A	A	B	A	B	B	A	B
BS00023967	1D	111.4	B	-	B	B	A	A	B	B	A	A	B	B	B	A	B	A	-	A	A	A	A	A	A	A	A	B	A	A	B	A	B	B	A	B	A	A	A	A	B	A	A	B	A	B	B	A	A
BS00112086	1D	111.4	B	A	B	B	A	A	B	B	A	A	B	B	B	A	B	A	-	A	A	A	A	A	A	A	A	B	A	A	B	A	B	B	A	B	A	A	A	A	B	A	A	B	A	B	B	A	A
BS00114366	1D	111.4	B	A	B	B	-	A	B	B	A	A	B	B	B	A	B	A	-	A	A	A	-	A	A	A	A	B	A	A	B	A	B	B	A	B	A	A	A	A	B	A	A	-	A	-	B	A	A
BS00118407	1D	111.4	B	A	B	B	A	A	B	B	A	A	B	B	B	A	B	A	-	A	A	A	A	A	A	A	A	B	A	A	B	A	B	B	A	B	A	A	A	A	B	A	A	B	A	B	B	A	A
BS00122150	1D	111.4	B	-	B	-	A	A	B	B	-	-	-	-	B	-	-	A	-	A	-	-	A	A	-	-	A	B	-	A	B	A	B	-	A	B	A	A	-	A	B	A	A	-	A	B	-	A	A
BS00132985	1D	111.4	B	-	B	B	A	-	B	B	-	A	B	B	-	A	B	A	-	A	-	-	-	A	-	A	A	B	A	A	B	A	B	B	A	B	A	A	A	A	B	A	-	-	A	B	-	A	A
BS00140910	1D	111.4	B	A	B	B	A	A	B	B	A	A	B	B	B	A	B	A	-	A	A	A	A	A	A	A	A	B	A	A	B	A	B	B	A	B	A	A	A	A	B	A	A	B	A	B	B	A	A
BS00157380	1D	111.4	B	A	B	B	A	A	B	B	A	A	B	B	B	A	B	A	-	A	A	A	A	A	A	A	A	B	A	A	B	A	B	B	A	B	A	A	A	A	B	A	A	B	A	B	B	A	A
BS00162147	1D	111.4	B	A	B	B	A	A	B	B	A	A	B	B	B	A	B	A	-	A	A	A	A	A	A	A	A	B	A	A	B	A	B	B	A	B	A	A	A	A	B	A	A	B	A	B	B	A	A
BS00162508	1D	111.4	B	A	B	-	A	A	B	B	A	A	B	B	B	A	B	A	-	A	A	A	A	A	A	A	A	B	A	A	B	A	B	B	A	B	A	A	A	A	B	A	A	B	A	B	B	A	A
BS00163009	1D	111.4	B	A	B	B	A	A	B	B	A	A	B	B	B	A	B	A	-	A	A	A	A	A	A	A	A	B	A	A	B	A	B	B	A	B	A	A	A	A	B	A	A	B	A	B	B	A	A
BS00163279	1D	111.4	B	A	B	B	A	A	B	B	A	A	B	B	B	A	B	A	-	A	A	A	A	A	A	A	A	B	A	A	B	A	B	B	A	B	A	A	A	A	B	A	A	B	A	B	B	A	A
BS00165315	1D	111.4	B	A	B	B	A	A	B	B	A	A	B	B	B	A	B	A	-	A	A	A	A	A	A	A	A	B	A	A	B	A	B	B	A	B	A	A	A	A	B	A	A	B	A	B	B	A	A
BS00164687	1D	112	B	A	B	B	A	A	B	B	A	A	B	B	B	A	B	A	-	A	A	A	A	A	A	A	A	B	A	A	B	A	B	B	A	B	A	A	A	A	B	A	A	B	A	B	B	A	B
BS00127421	1D	112.5	B	A	B	B	A	A	B	B	A	A	B	B	B	A	B	A	-	A	A	A	A	A	A	A	A	B	A	A	B	A	B	B	A	B	A	A	A	A	B	A	A	B	A	B	B	A	B
BS00130457	1D	112.5	B	A	B	B	A	A	B	B	A	A	B	B	B	A	B	A	-	A	A	A	A	A	A	A	A	B	A	A	B	A	B	B	A	B	A	A	A	A	B	A	A	B	A	B	B	A	B
BS00113456	1D	113	B	A	B	B	A	A	B	B	A	A	B	B	B	A	B	A	-	A	A	A	A	A	A	A	A	B	A	A	B	A	B	B	A	B	A	A	A	A	B	A	-	B	A	B	B	A	B
BS00022654	1D	114.1	B	A	-	B	A	A	B	B	A	A	B	B	B	A	B	A	A	A	A	A	A	A	A	A	A	B	A	A	B	A	B	B	A	B	A	A	A	-	B	A	A	B	A	A	B	A	A
Elf3	1D	114.1	B	A	B	-	-	-	B	B	A	A	B	-	B	A	B	A	A	A	A	A	A	A	-	A	A	B	A	-	B	A	B	B	A	B	-	A	A	A	B	-	-	-	-	-	-	-	-
BS00166068	1D	114.1	B	-	B	-	A	A	B	B	-	-	-	-	B	-	-	A	-	A	-	-	A	-	-	-	A	B	-	A	B	A	B	-	A	B	A	-	-	A	B	-	B	-	A	B	-	A	A
BS00022485	1D	114.6	B	A	B	-	A	A	B	B	A	A	B	B	B	A	B	A	A	A	A	-	A	A	A	A	A	B	A	A	B	A	B	B	A	B	A	A	A	A	B	A	A	B	A	A	B	A	A
BS00023957	1D	125.4	B	A	A	B	A	A	B	-	A	A	A	-	A	A	B	A	-	A	A	A	A	A	A	A	A	A	A	A	B	A	-	-	A	B	A	A	A	A	B	A	A	B	A	A	B	A	A
PpdA1	2A	0	A	B	A	B	-	B	A	-	A	B	A	B	A	-	B	A	B	-	A	B	A	B	A	A	-	A	B	A	A	-	B	A	B	B	-	B	B	B	-	-	B	B	B	A	A	A	A
bArc124b	2A	62.5	A	B	A	A	A	A	A	A	A	B	A	A	A	B	B	A	A	A	B	B	-	B	A	B	B	A	-	A	B	B	A	B	B	A	-	B	A	A	A	-	B	A	A	A	A	B	A
BS00022777	2A	66.9	-	-	A	A	-	A	-	A	A	B	A	A	A	B	B	A	A	A	B	B	B	B	A	B	B	A	B	A	B	B	A	B	B	A	A	B	A	A	A	B	B	A	A	B	A	B	-
BS00022024	2A	67.5	A	-	A	A	A	A	A	A	A	B	A	A	A	B	B	A	A	A	B	B	B	B	A	B	B	A	B	A	B	B	A	B	B	A	A	B	A	A	A	B	B	A	A	B	A	B	A
BS00023039	2A	67.5	A	B	A	A	A	A	A	A	A	-	A	A	A	B	B	-	A	A	B	B	B	B	A	B	B	A	B	-	B	B	A	B	B	A	A	B	A	-	A	B	B	A	-	-	A	B	A
BS00023052	2A	67.5	A	B	A	A	A	A	A	A	A	-	A	A	A	B	B	A	A	A	B	B	B	B	A	B	B	A	B	A	B	B	A	B	B	A	A	B	A	A	A	B	B	A	A	B	-	B	-
BS00003735	2A	68.1	A	B	A	A	A	A	A	A	A	B	A	A	A	B	B	A	A	-	-	B	B	B	A	-	B	A	B	A	B	B	A	B	B	A	A	B	A	-	A	B	B	A	A	A	A	B	A
BS00010624	2A	68.1	A	B	A	A	A	A	A	A	A	-	A	A	A	B	B	A	A	-	-	B	B	B	A	-	B	A	B	A	B	B	A	B	B	A	A	B	A	-	A	B	B	A	A	A	A	B	A
BS00023969	2A	68.1	A	B	-	A	-	A	A	A	A	-	-	A	-	B	B	A	-	A	B	B	B	B	-	B	B	A	B	A	B	B	A	B	B	A	A	B	A	A	-	B	B	A	A	A	-	B	-
wPt-5647	2A	72.6	-	B	-	B	A	A	A	A	A	B	-	-	A	-	B	A	A	B	B	B	B	B	A	A	B	-	B	-	B	B	-	B	-	-	-	B	A	A	A	B	B	A	A	A	A	-	A
BS00004385	2A	73.3	A	B	A	B	A	A	A	A	A	B	A	A	A	B	B	A	A	-	-	B	B	B	A	-	B	A	-	-	B	B	A	B	B	A	B	B	A	-	A	B	B	A	A	A	A	B	B
BS00011271	2A	73.9	A	B	A	B	A	A	A	A	A	B	A	A	A	B	B	A	A	-	B	B	-	B	A	-	B	A	B	A	B	B	A	B	B	A	B	B	A	-	A	B	B	A	A	A	A	A	B
BS00023215	2A	91.7	A	B	A	B	B	A	A	B	A	B	A	A	A	B	B	A	-	B	A	B	A	-	A	A	A	-	B	A	B	B	A	B	A	A	B	-	A	A	A	A	B	A	B	-	A	A	A
BS00003845	2A	94	A	B	A	B	B	A	A	B	A	B	A	A	A	B	B	A	A	-	-	B	A	B	A	-	A	-	B	A	B	-	A	B	A	A	B	B	A	-	A	A	B	A	B	A	A	A	A
BS00003867	2A	94	A	B	A	B	B	A	A	B	A	B	A	A	A	B	B	A	A	-	-	B	A	B	A	-	A	-	B	A	B	B	A	B	A	A	B	B	A	-	A	A	B	A	B	A	A	A	A
BS00011101	2A	94	A	B	A	B	B	A	A	B	A	B	A	A	A	B	B	A	A	-	A	B	A	B	-	-	A	A	B	A	B	B	A	B	A	A	B	B	A	-	A	A	B	A	B	A	A	A	A
BS00011593	2A	94	A	B	A	B	B	A	A	B	A	B	A	A	A	B	B	A	A	-	A	B	A	B	A	-	A	A	B	A	B	B	A	B	A	A	B	B	A	-	A	A	B	A	B	A	A	A	A
BS00014736	2A	94	A	B	A	B	B	A	A	B	A	B	A	A	A	B	B	A	A	-	A	B	A	B	A	-	A	A	B	A	B	B	A	B	A	A	B	B	A	-	A	A	B	A	B	A	A	A	A
BS00016676	2A	94	A	B	A	B	B	A	A	B	A	B	A	A	A	B	B	A	A	-	-	B	A	B	A	-	A	A	B	A	B	B	A	B	A	A	B	B	A	-	A	A	B	A	B	A	A	A	A
BS00021691	2A	94	A	B	A	B	B	A	A	B	A	B	A	-	A	B	B	A	A	-	A	B	A	B	A	-	A	A	-	A	B	B	A	B	A	A	B	B	A	-	A	A	B	A	B	A	A	A	A
BS00021706	2A	94	A	B	A	B	B	A	A	B	A	B	A	A	A	B	B	A	A	-	A	B	A	B	A	-	A	A	B	A	B	B	A	B	A	A	B	B	A	-	-	A	B	A	B	A	A	A	-
BS00023984	2A	94	A	-	A	B	B	A	A	B	A	B	-	A	A	B	B	A	-	B	A	B	A	-	A	A	A	-	B	A	B	B	A	B	A	A	B	B	A	B	A	A	B	A	B	A	-	-	A
BS00086365	2A	94	A	B	A	B	B	A	A	B	A	B	A	A	A	B	B	A	-	B	A	-	A	B	A	A	A	A	B	A	B	B	A	B	A	A	B	B	A	-	A	A	B	A	B	A	A	A	A
wPt-4094	2A	94	A	B	A	B	B	A	A	B	A	B	A	A	A	B	B	A	A	B	A	B	A	B	A	A	A	A	B	A	B	B	A	B	A	A	-	B	A	B	A	A	B	A	B	A	A	-	A
wPt-2087	2A	94.6	A	B	A	B	B	A	A	B	A	B	A	A	A	B	B	A	A	B	A	B	A	B	A	A	A	A	B	A	B	B	A	B	A	A	-	B	A	B	A	A	B	A	B	A	A	A	A
gwm296	2A	95.8	A	B	A	B	B	-	-	B	A	B	A	-	-	B	B	-	A	-	-	B	-	-	A	A	A	-	B	-	B	-	A	-	A	A	-	-	A	B	A	A	-	-	-	-	-	-	A
wPt-7285	2A	95.8	A	B	A	B	B	A	A	B	A	B	A	A	A	B	B	A	A	-	A	B	A	B	-	A	A	A	B	A	B	-	A	B	A	A	-	B	A	-	A	A	B	A	B	-	A	A	A
BS00053661	2A	97.1	A	B	A	B	B	A	A	B	A	B	A	B	A	B	B	A	-	B	A	B	A	B	A	A	A	A	B	A	B	B	A	-	-	A	B	-	A	B	A	A	B	A	B	A	A	A	-
gwm359	2A	100.8	A	B	A	B	B	A	A	B	A	B	A	B	A	B	B	A	A	-	A	B	A	B	A	A	-	A	-	A	B	B	A	B	A	A	-	B	A	B	B	A	B	A	-	A	A	A	-
BS00009604	2A	107.3	-	-	A	-	-	B	A	B	-	B	-	-	-	-	B	A	-	-	-	-	A	B	-	-	A	A	B	A	A	-	A	-	A	-	B	B	-	-	B	A	-	B	B	A	A	A	B
BS00009933	2A	107.3	A	B	A	B	B	B	A	B	A	B	A	B	A	B	B	A	A	-	A	B	A	B	A	-	A	A	B	A	A	B	A	B	A	B	B	B	A	-	B	A	B	B	B	A	A	A	B
BS00022487	2A	107.3	A	B	A	B	B	B	A	B	A	B	A	B	A	B	B	A	A	B	A	B	A	B	A	A	A	A	B	A	A	B	A	B	A	B	B	B	A	B	B	A	B	B	B	-	A	A	B
BS00094817	2A	107.3	A	B	A	B	B	B	A	B	A	B	A	B	A	B	B	A	-	B	A	B	A	B	A	A	A	A	B	A	A	B	A	B	A	B	B	B	A	B	B	A	B	B	B	A	A	A	B
BS00070798	2A	108.2	A	B	-	B	B	B	A	B	A	B	A	B	A	B	B	A	-	B	A	B	A	B	-	A	A	A	B	A	A	B	A	B	A	B	B	B	A	B	B	A	B	B	B	A	A	A	B
BS00009730	2A	116.1	A	B	A	B	B	B	A	A	A	B	A	B	A	B	B	A	A	-	-	B	A	B	A	-	A	-	B	B	A	-	A	A	A	B	B	A	B	-	B	A	B	B	B	A	A	A	A
BS00016060	2A	116.1	-	-	A	B	B	B	A	-	-	B	A	B	A	B	B	A	A	-	A	B	A	-	A	-	A	A	B	B	A	B	A	A	A	B	B	A	-	-	B	A	B	B	B	A	A	-	-
BS00022332	2A	116.1	A	B	A	B	B	B	A	A	A	B	A	B	A	B	B	A	A	B	A	-	A	B	A	A	A	A	B	B	A	B	A	A	A	B	B	A	B	B	B	A	B	B	B	-	A	A	A
BS00043416	2A	116.1	A	B	A	B	B	B	A	A	A	B	A	B	A	B	B	A	-	-	-	B	A	-	A	A	-	A	B	B	A	B	A	A	A	B	B	-	-	B	B	A	B	B	B	A	A	A	A
wPt-7056	2A	117.3	A	B	A	B	B	B	A	A	A	B	A	B	A	B	B	A	A	B	A	B	A	B	A	A	A	A	B	B	A	B	A	A	A	B	-	A	B	B	B	A	B	B	B	A	A	A	A
BS00045900	2A	123.5	A	B	-	B	B	B	A	A	A	B	A	B	B	B	B	A	-	B	A	B	A	A	A	A	A	A	B	B	A	B	A	A	A	B	B	-	B	B	B	-	B	B	A	A	A	A	A
BS00001108	2A	124	A	B	A	B	B	B	A	A	A	B	A	B	B	B	B	A	-	B	A	B	A	A	A	A	A	A	B	B	A	B	A	A	A	B	B	A	B	B	B	A	B	B	A	A	A	A	B
BS00003574	2A	128.1	A	B	A	B	B	B	A	A	A	B	A	B	B	B	B	A	-	-	A	B	A	A	A	-	A	A	B	B	A	B	A	A	A	B	B	A	B	-	B	A	B	B	A	A	A	A	B
BS00003779	2A	128.1	A	B	A	B	B	B	A	A	A	B	A	B	B	B	B	A	A	-	A	B	A	A	A	-	A	A	B	B	A	B	A	A	A	B	B	A	B	-	B	A	B	B	A	A	A	A	A
BS00011865	2A	128.1	-	B	A	B	B	B	A	-	A	B	A	B	B	B	B	A	A	-	A	B	A	A	-	-	A	A	B	-	A	B	A	A	A	B	B	A	B	-	B	A	B	B	A	A	A	A	-
BS00022872	2A	128.1	A	-	A	B	B	B	A	A	A	B	A	B	B	B	B	A	A	B	A	B	A	A	A	A	A	A	B	B	A	B	A	A	A	B	B	A	B	B	B	A	B	B	A	-	A	A	-
BS00059606	2A	128.1	A	B	A	-	B	B	A	A	A	B	A	B	B	B	B	A	-	B	A	B	A	A	A	A	A	A	B	B	A	B	A	A	A	B	B	A	-	B	B	A	B	B	A	A	A	A	A
BS00059607	2A	128.1	A	B	A	-	B	B	A	A	A	B	A	B	B	B	B	A	-	B	A	B	A	A	A	A	A	A	B	B	A	B	A	A	A	B	B	A	B	B	B	A	B	B	A	A	A	A	A
cos2R	2A	129.3	A	B	A	B	-	B	A	-	A	B	A	B	B	-	B	B	-	B	A	B	A	A	A	-	A	A	B	B	A	-	A	A	A	B	-	A	B	B	-	A	-	-	A	A	A	A	A
gwm122	2A	129.3	A	B	A	B	B	B	A	A	A	B	A	B	B	B	B	B	A	B	A	B	A	A	A	A	A	A	B	B	A	B	A	A	A	B	-	A	B	B	B	A	B	B	A	A	A	A	A
s528TCAC	2A	129.3	A	B	A	B	B	B	A	A	A	B	A	B	B	B	B	B	A	B	A	B	A	A	A	A	A	A	-	B	A	B	A	A	A	B	-	A	B	B	B	A	B	B	A	A	A	A	A
wPt-4201	2A	129.3	A	B	A	B	B	B	A	A	A	-	A	B	B	B	B	B	A	B	A	B	-	-	A	A	-	A	B	B	A	B	A	A	A	B	-	A	B	B	B	A	-	B	A	A	A	A	A
BS00002994	2A	129.9	A	B	A	B	B	B	A	A	A	B	A	B	B	B	B	B	A	-	-	B	A	A	A	-	A	-	B	B	A	B	A	A	A	B	B	A	B	-	B	A	B	B	A	A	A	A	B
BS00003878	2A	129.9	A	B	A	B	B	B	A	A	A	B	A	B	B	B	B	B	A	-	-	B	A	A	A	-	A	A	B	B	A	B	A	A	A	B	B	A	B	-	B	A	B	B	A	A	A	A	B
BS00004004	2A	129.9	A	B	A	B	B	B	A	A	A	B	A	B	B	B	B	B	A	-	A	B	A	A	A	-	A	A	B	B	A	B	A	A	A	B	B	A	B	-	B	A	B	B	A	A	A	A	B
BS00010672	2A	129.9	A	B	A	B	B	B	A	A	A	B	A	B	B	B	B	B	A	-	A	B	A	A	A	-	A	A	B	B	A	B	A	A	A	B	B	A	B	-	B	A	B	B	A	A	A	A	-
BS00011517	2A	129.9	A	B	A	B	B	B	A	A	A	B	A	B	B	B	B	B	A	-	A	B	A	A	A	-	A	A	B	B	A	B	A	A	A	B	B	A	-	-	B	A	B	B	A	A	A	A	B
BS00039489	2A	129.9	A	B	A	B	B	B	A	A	A	B	A	B	B	B	B	B	-	B	A	B	A	A	A	A	A	A	B	B	A	B	A	A	A	B	B	A	B	B	B	A	B	B	A	A	A	A	B
BS00052043	2A	129.9	A	B	A	B	B	B	A	A	A	B	A	B	B	B	B	B	-	B	A	B	A	A	A	A	A	A	B	B	A	B	A	A	A	B	B	A	B	B	B	A	B	B	A	A	A	A	-
wPt-7306	2A	129.9	A	B	A	B	B	B	A	A	A	B	A	B	B	B	B	B	A	B	A	B	A	A	A	A	A	A	B	B	A	B	A	A	A	B	-	A	B	B	B	A	B	B	A	A	A	A	A
BS00003898	2A	130.4	A	B	A	B	B	B	A	A	A	B	A	B	B	B	B	B	A	-	-	B	A	A	A	-	A	A	B	B	A	B	A	-	A	B	B	A	A	-	B	A	B	B	A	A	A	A	B
BS00008805	2A	130.4	A	B	A	B	B	B	A	A	A	B	A	B	B	B	B	B	-	B	A	B	A	A	A	A	A	A	B	B	A	B	A	A	A	B	B	A	B	B	B	A	B	B	A	A	A	A	B
BS00009256	2A	130.4	-	B	A	B	B	B	A	A	A	B	A	B	B	B	B	B	A	-	-	B	A	A	A	-	A	A	B	B	A	B	A	A	A	B	B	A	B	-	B	A	B	B	A	A	A	A	B
BS00009588	2A	130.4	A	B	A	B	-	B	A	-	A	B	A	-	-	B	B	B	A	-	A	B	-	A	A	-	A	A	B	B	A	B	A	A	A	B	B	A	B	-	B	A	B	B	A	A	A	A	-
BS00009667	2A	130.4	A	B	A	-	B	B	A	A	A	-	A	B	B	-	B	B	A	-	A	B	-	-	A	-	A	A	B	-	A	B	A	A	A	B	B	A	-	-	B	A	B	B	A	A	A	-	-
BS00010194	2A	130.4	A	B	A	B	B	B	A	A	A	B	A	B	B	B	B	B	A	-	A	B	A	A	A	-	A	A	B	B	A	B	A	A	A	B	B	A	B	-	B	A	B	B	A	A	A	A	B
BS00011045	2A	130.4	-	B	A	B	B	B	-	-	A	B	A	B	B	B	B	B	A	-	-	B	-	A	A	-	A	A	B	-	A	B	A	A	A	B	B	A	-	-	B	A	B	B	A	A	A	A	B
BS00011467	2A	130.4	-	B	A	B	B	B	A	-	A	-	A	B	B	B	B	B	A	-	A	B	A	A	A	-	A	A	-	-	A	B	A	A	A	B	B	A	-	-	B	A	B	-	A	A	A	A	B
BS00012040	2A	130.4	B	B	A	B	B	B	A	-	A	B	A	B	B	B	B	B	A	-	A	B	A	A	A	-	A	A	B	B	A	B	A	A	A	B	B	A	B	-	B	A	B	B	A	A	A	A	B
BS00021812	2A	130.4	-	B	A	B	B	B	A	A	A	B	A	B	B	B	-	B	A	-	-	B	-	A	A	-	A	-	B	B	A	B	A	A	A	B	B	A	B	-	B	A	B	B	A	-	A	A	B
BS00031140	2A	130.4	A	B	-	B	-	B	A	A	A	B	-	B	B	B	B	B	-	B	A	B	A	A	A	A	A	-	B	B	A	B	A	A	A	B	B	-	B	B	B	-	B	B	A	A	A	A	B
BS00034699	2A	130.4	A	B	A	B	B	B	A	A	A	B	A	B	B	B	B	B	-	B	A	B	A	A	A	A	A	A	B	B	A	B	A	A	A	B	B	A	B	B	B	A	B	B	A	A	A	A	-
BS00047843	2A	130.4	A	B	A	B	B	B	A	A	A	B	A	B	B	B	B	B	-	B	A	B	A	A	A	-	A	A	B	B	A	B	A	A	A	B	B	-	B	B	B	A	B	B	A	A	A	A	B
BS00056232	2A	130.4	A	B	A	-	B	B	A	A	A	B	A	B	B	B	B	B	-	B	A	B	A	A	A	A	A	A	B	B	A	B	A	A	A	B	B	A	B	B	B	A	B	B	A	A	A	A	B
BS00059111	2A	130.4	A	B	A	B	B	B	A	A	A	B	A	B	B	B	B	B	-	B	A	B	A	A	A	A	A	A	B	B	A	B	-	-	-	B	B	-	-	B	B	-	-	B	A	A	A	A	B
BS00074415	2A	130.4	A	B	A	B	B	B	A	A	A	B	A	B	B	B	B	B	-	B	A	B	A	A	A	A	A	A	B	B	A	B	A	A	A	B	B	-	B	B	B	A	B	B	A	A	A	A	B
BS00077438	2A	130.4	A	B	A	B	B	B	-	A	A	B	A	B	B	B	B	B	-	B	A	B	A	A	A	A	A	A	B	B	A	B	A	A	A	B	B	A	B	B	B	A	B	B	A	A	A	-	B
BS00088285	2A	130.4	A	B	A	-	B	B	A	A	A	B	A	B	B	B	B	B	-	B	A	B	A	A	A	A	A	A	B	B	A	B	A	A	A	B	B	A	B	B	B	A	B	B	A	A	A	A	B
BS00091670	2A	130.4	A	B	A	B	B	B	A	A	A	B	A	B	B	B	B	B	-	B	A	B	A	A	A	A	A	A	B	B	A	B	A	A	A	B	B	A	B	B	B	-	B	B	A	A	A	A	B
BS00097263	2A	130.4	A	B	A	B	B	B	A	A	A	B	-	B	-	B	B	B	-	B	A	B	A	A	A	A	A	A	-	B	A	B	A	A	A	B	B	-	-	B	B	A	B	B	A	A	A	A	-
eAGCmCTA315	2A	130.4	A	B	A	B	B	-	-	A	A	B	A	-	-	B	B	-	A	-	-	B	-	-	A	A	A	-	A	-	A	-	A	-	A	B	-	-	B	B	B	A	-	-	-	-	-	-	B
eATTmCGC100	2A	130.4	A	B	A	B	B	-	-	A	A	B	A	-	-	B	B	-	A	-	-	B	-	-	A	A	A	-	A	-	A	-	A	-	A	B	-	-	B	B	B	A	-	-	-	-	-	-	A
wmc453A	2A	130.4	A	B	A	B	B	A	A	A	A	B	A	B	B	-	B	A	A	A	B	B	A	A	A	A	A	A	-	B	A	B	A	A	A	B	-	-	B	B	B	A	A	B	B	-	A	A	-
BS00023157	2A	131.7	-	-	A	-	-	B	A	A	A	B	-	B	B	B	B	B	A	B	A	B	A	A	A	A	A	A	B	B	A	B	A	-	A	B	-	A	B	B	B	A	B	B	A	B	-	A	-
BS00022301	2A	133.1	A	-	A	B	B	B	A	A	A	B	A	B	B	B	B	B	A	B	A	B	A	A	A	A	A	A	B	B	A	B	A	A	A	B	B	A	B	B	B	A	B	B	A	B	A	A	A
BS00022494	2A	133.1	-	A	A	B	B	B	-	A	A	-	-	B	B	B	-	-	A	B	A	-	A	A	A	-	A	A	B	B	A	B	A	A	A	B	B	-	-	-	-	A	B	B	A	B	A	A	-
bArc11b	2A	133.7	A	A	A	B	-	B	A	A	-	B	A	B	B	B	B	B	A	B	A	B	A	A	A	A	A	A	B	B	A	B	A	A	A	B	-	A	B	B	B	A	B	B	A	A	A	A	A
BS00021767	2A	133.7	A	A	A	B	B	B	A	A	A	B	-	B	B	B	B	B	A	-	A	B	-	A	A	-	A	A	B	B	A	B	A	A	A	B	B	A	B	-	B	A	B	B	A	A	A	A	A
BS00049644	2A	133.7	A	A	A	B	B	-	A	A	A	B	A	B	B	B	B	B	-	B	A	B	A	A	A	A	A	A	B	-	A	B	A	A	A	B	B	A	B	B	B	A	B	B	A	A	A	-	A
BS00012126	2A	134.2	A	A	A	B	B	B	A	A	A	B	A	B	B	B	B	B	A	-	A	B	A	A	A	-	A	A	B	B	A	B	A	A	A	-	B	A	B	-	B	A	B	B	A	A	A	A	B
BS00011945	2A	138.1	A	A	A	B	B	A	A	A	A	B	A	B	B	B	B	B	A	-	A	B	A	A	A	-	A	A	B	B	A	B	A	A	A	A	B	A	B	-	B	A	B	B	A	A	A	A	B
gwm445	2A	141	A	A	A	B	B	A	A	A	B	B	A	B	B	B	B	B	A	B	A	B	A	A	A	A	A	A	B	B	A	B	A	A	A	A	-	A	B	B	B	A	B	B	A	A	A	A	A
BS00010696	2A	143	A	A	A	B	B	A	A	A	B	B	-	B	-	B	B	B	A	-	A	B	A	-	-	-	A	A	B	B	A	-	A	A	A	A	B	A	B	-	B	A	B	A	B	A	A	-	-
BS00094574	2A	156.4	A	A	B	B	B	A	A	A	B	B	A	B	B	B	B	B	-	B	A	B	A	B	A	A	A	A	A	B	A	B	A	A	A	A	B	B	B	B	B	A	B	A	B	A	-	A	B
BS00079611	2A	157.6	A	A	B	B	B	A	A	A	B	A	A	B	B	B	B	B	-	B	A	B	A	B	A	A	-	A	-	-	A	B	-	A	A	A	B	-	-	B	B	-	B	A	B	A	B	A	B
wmc181A	2A	168.9	A	A	B	B	B	-	A	A	B	A	A	B	B	B	B	B	B	B	A	B	A	B	B	-	A	A	A	A	A	B	A	B	-	A	-	B	B	B	B	A	B	A	B	A	B	A	B
BS00024921	2A	178.9	A	A	B	B	B	A	A	A	B	A	A	B	B	B	A	B	-	B	A	B	A	B	B	A	A	A	A	A	A	B	A	B	A	A	B	B	B	B	B	A	B	A	B	A	B	A	-
BS00010901	2A	183	A	A	B	B	B	A	B	A	B	A	B	B	B	B	A	B	A	-	A	B	A	B	B	-	B	A	A	A	A	B	A	B	A	A	B	B	B	-	B	A	B	A	B	A	B	A	B
BS00001260	2A	183.6	A	A	B	B	B	A	B	A	B	A	B	B	B	B	A	B	A	-	-	B	A	B	B	-	B	A	A	A	A	B	A	B	A	A	B	B	B	-	B	A	B	A	B	A	B	A	B
BS00009817	2A	183.6	A	A	B	B	B	A	B	A	B	A	B	B	B	B	A	B	-	B	A	B	A	B	B	A	B	A	A	A	A	B	A	B	A	A	B	B	B	B	B	A	B	A	B	A	-	A	B
BS00011478	2A	184.8	A	-	B	B	B	A	B	A	-	A	B	B	B	B	A	B	A	-	A	B	A	B	B	-	B	A	A	A	A	B	A	B	A	A	B	B	-	-	B	B	B	A	B	A	B	A	-
BS00089308	2A	184.8	-	A	-	B	B	A	B	A	B	A	B	B	B	B	A	B	-	B	A	B	A	B	B	A	B	A	A	A	A	B	A	B	A	A	B	B	B	B	B	B	B	A	B	A	B	A	A
BS00089310	2A	185.3	A	A	B	B	B	A	B	A	B	A	B	B	B	B	A	B	-	B	A	B	A	B	B	A	B	A	A	A	A	B	A	B	A	A	B	B	B	B	B	B	B	A	B	A	B	-	A
BS00003663	2A	187.6	A	A	B	B	B	A	B	A	B	A	B	B	B	B	A	B	A	-	-	B	A	B	B	-	B	A	A	A	A	B	A	B	A	A	B	B	B	-	B	B	B	A	B	A	B	A	B
BS00011075	2A	188.2	A	A	B	B	B	A	-	A	B	A	B	B	B	B	A	B	A	-	A	B	A	B	B	-	B	A	A	-	A	B	A	B	A	A	B	B	B	-	B	B	B	A	B	A	B	A	-
BS00004090	2A	189.8	A	A	B	B	B	A	B	A	B	A	B	B	B	B	A	B	A	-	-	B	A	B	B	-	B	A	A	A	A	B	A	B	A	A	B	B	B	-	B	B	B	A	B	A	B	A	B
BS00097307	2A	191	A	A	B	B	B	A	B	A	B	A	B	B	B	B	A	B	-	B	A	B	A	B	B	A	B	A	A	A	A	B	A	B	A	A	B	-	B	B	B	B	B	A	B	A	B	A	B
BS00009959	2A	195.1	A	A	B	B	A	A	B	A	B	A	B	B	B	B	A	B	A	-	-	B	A	B	B	-	B	A	A	A	A	B	A	B	A	A	A	B	B	-	B	B	B	A	B	A	B	A	B
BS00021893	2A	195.1	A	A	B	B	A	A	B	A	B	A	B	B	B	B	A	B	A	-	A	B	A	-	B	-	B	A	A	-	A	B	A	B	A	A	A	B	-	-	B	B	B	A	B	A	B	A	-
BS00022209	2A	195.1	A	A	B	B	-	A	B	A	B	A	B	B	B	B	A	B	A	A	A	-	A	B	B	-	B	-	A	A	A	B	A	B	A	A	A	B	B	-	-	B	B	A	-	A	B	A	B
BS00011169	2A	200.4	A	A	B	A	A	-	B	A	B	A	-	B	B	B	A	B	A	-	A	B	A	B	B	-	B	A	A	A	A	B	A	B	A	A	A	B	B	-	B	B	B	A	B	A	B	-	A
BS00022321	2A	200.4	A	A	B	-	A	A	B	A	B	A	-	B	B	B	A	B	-	A	A	B	A	-	B	A	B	A	A	A	A	B	A	B	A	A	A	B	B	B	B	B	B	A	B	A	B	A	-
BS00063368	2A	200.4	A	A	B	B	A	A	B	A	B	A	B	B	B	B	A	B	-	A	A	B	A	B	B	A	B	A	A	A	A	B	A	B	A	A	A	B	B	B	B	B	B	A	B	A	B	A	A
BS00102709	2A	200.4	A	A	B	B	A	A	B	A	B	A	B	B	B	B	A	B	-	A	A	B	A	-	B	A	-	A	-	A	A	B	A	B	A	A	A	-	-	-	B	-	-	A	B	A	B	A	A
BS00053717	2A	212.5	A	B	B	A	A	B	B	B	B	A	A	-	B	B	A	B	-	A	A	B	A	A	B	A	B	A	A	A	A	B	A	B	-	A	A	-	B	B	B	B	B	B	B	A	A	B	A
BS00009362	2A	213.1	A	B	B	A	A	B	B	B	B	A	A	B	B	B	A	B	B	-	A	B	A	-	B	-	B	A	A	A	A	B	A	B	A	A	A	B	B	-	B	B	B	-	B	A	A	B	B
BS00021676	2A	213.7	A	B	B	A	A	A	B	B	B	A	A	B	B	B	A	B	B	-	A	B	A	A	B	-	B	A	A	A	A	B	A	B	A	A	A	B	-	-	B	B	B	A	B	A	A	-	-
BS00009616	2A	215.5	A	A	B	A	A	B	B	B	B	A	A	B	B	B	A	B	B	-	A	B	A	B	B	-	B	A	A	A	A	B	A	B	A	A	A	B	A	-	B	B	B	A	B	A	A	B	A
BS00009710	2A	215.5	-	A	B	-	A	-	B	-	-	-	A	B	B	B	A	-	-	-	A	B	-	-	B	-	-	-	A	-	A	-	-	B	A	A	A	B	A	-	-	-	B	A	B	-	A	B	-
BS00010729	2A	215.5	A	A	B	A	A	B	B	B	B	A	A	B	B	B	A	B	B	-	A	B	A	B	B	-	B	A	A	A	A	B	A	-	A	A	A	B	A	-	B	B	B	A	B	A	A	B	-
BS00014037	2A	215.5	A	A	B	A	A	-	-	B	B	A	A	B	B	B	A	B	B	-	A	B	A	B	B	-	B	A	A	A	A	B	A	B	A	A	A	B	A	-	B	B	B	A	B	A	A	B	A
BS00022467	2A	215.5	A	A	B	A	A	B	B	B	B	A	A	B	B	B	A	B	B	A	A	B	A	B	B	A	B	A	A	A	A	B	A	B	A	-	A	B	A	B	B	B	B	A	B	A	A	B	A
BS00022923	2A	215.5	A	A	B	-	A	B	B	B	B	A	A	B	B	B	A	B	B	-	A	B	A	B	B	A	B	A	A	-	A	B	A	B	A	A	A	B	A	B	B	B	B	A	B	A	A	B	A
BS00022925	2A	215.5	A	A	B	A	A	B	B	B	B	A	A	B	B	B	A	B	B	A	A	-	A	B	B	A	B	-	A	A	A	B	A	B	A	A	A	B	A	B	B	-	B	A	B	A	A	B	-
BS00069105	2A	215.5	A	A	B	A	A	B	B	B	B	A	A	B	B	B	A	B	-	A	A	B	A	B	B	-	B	A	A	A	A	B	A	B	A	A	A	-	A	B	B	-	B	A	B	A	A	B	-
BS00032383	2A	216.6	A	A	B	A	A	B	B	B	B	A	A	B	B	B	A	B	-	A	A	B	A	B	B	A	B	A	A	A	-	B	A	B	A	A	A	-	A	B	B	B	B	A	B	A	A	B	A
BS00091763	2A	216.6	A	A	B	A	A	B	B	B	B	A	A	B	B	B	A	B	-	A	A	B	A	B	B	A	B	A	A	A	A	B	A	B	A	A	A	B	A	B	B	B	B	A	B	A	A	B	B
BS00107649	2A	216.6	A	A	B	A	A	B	B	B	B	A	A	B	B	B	A	B	-	A	A	B	A	B	B	A	B	-	-	A	A	B	-	B	A	A	A	-	-	B	B	-	B	A	B	A	A	B	-
BS00007689	2A	218.9	A	A	B	A	A	B	B	B	B	A	A	B	B	B	A	B	-	A	A	B	A	B	B	A	B	A	-	A	A	B	A	-	A	A	A	-	-	-	B	-	-	A	B	A	B	B	-
BS00009295	2A	218.9	A	A	B	A	A	B	B	B	B	A	A	B	B	B	A	B	B	-	A	B	A	B	B	-	B	A	A	A	A	B	A	B	A	A	A	B	A	-	B	B	B	A	B	A	B	B	A
BS00009692	2A	218.9	A	A	B	A	A	B	B	B	B	A	A	B	B	B	A	B	A	-	A	B	A	B	B	-	B	A	A	A	A	B	A	B	A	A	A	B	A	-	B	B	B	A	B	A	B	B	B
BS00009737	2A	218.9	A	A	B	A	A	B	B	-	B	A	A	B	B	B	A	B	A	-	A	B	A	B	B	-	B	A	A	A	A	B	A	B	A	A	A	B	A	-	B	B	B	A	B	A	B	-	-
BS00010477	2A	218.9	A	A	-	-	-	-	-	B	B	-	-	-	-	-	A	B	A	-	A	B	-	B	B	-	B	-	-	A	-	-	A	-	-	A	A	-	B	-	B	B	-	-	B	-	-	B	-
BS00010760	2A	218.9	A	A	B	A	A	B	B	B	B	A	A	B	B	B	A	B	A	-	A	B	A	B	B	-	B	A	A	A	A	B	A	B	A	A	A	B	A	-	B	B	B	A	B	A	B	B	B
BS00011190	2A	218.9	A	A	B	A	A	B	B	B	B	A	A	B	B	B	A	B	A	-	A	B	A	B	B	-	B	A	-	A	A	B	A	B	-	A	A	B	A	-	B	B	B	-	B	A	B	B	B
BS00011392	2A	218.9	A	-	B	A	A	B	B	B	B	A	A	B	B	B	A	B	A	-	A	B	A	B	B	-	B	A	A	A	A	B	A	B	A	A	A	B	A	-	B	B	B	A	B	A	B	B	B
BS00011539	2A	218.9	A	A	B	A	A	B	B	-	B	A	A	B	B	B	A	B	A	-	A	B	A	B	B	-	B	A	A	A	A	B	A	B	A	A	A	B	B	-	B	B	B	A	B	A	B	B	B
BS00011792	2A	218.9	A	A	B	A	A	B	B	B	B	A	A	B	B	B	A	B	A	-	A	B	A	B	B	-	B	A	A	-	A	B	A	B	A	A	A	B	-	-	B	B	B	A	B	A	B	B	B
BS00012066	2A	218.9	A	A	B	A	A	B	B	B	B	A	A	B	B	B	A	B	A	-	A	B	A	B	B	-	B	A	A	A	A	B	A	B	A	A	A	B	A	-	B	B	B	A	B	A	B	B	B
BS00013738	2A	218.9	A	A	B	A	A	B	B	-	B	A	A	B	B	B	A	B	A	-	A	B	A	-	B	-	B	A	A	A	A	B	A	B	A	A	A	B	A	-	B	B	B	A	B	A	B	B	B
BS00014087	2A	218.9	-	-	B	A	A	-	B	B	B	A	A	B	B	B	A	B	A	-	A	B	-	-	B	-	B	A	A	A	-	B	A	B	A	A	-	B	A	-	B	B	B	A	B	-	B	B	B
BS00021937	2A	218.9	-	A	B	A	A	B	B	-	B	A	A	B	B	B	A	B	B	-	A	B	-	B	B	-	B	A	A	-	A	B	A	B	A	A	A	B	-	-	B	B	B	A	B	A	B	B	A
BS00022150	2A	218.9	A	A	B	-	A	B	B	B	B	A	A	-	B	B	A	B	A	A	A	B	A	B	B	A	B	A	A	A	A	B	A	B	A	A	A	B	A	B	B	B	B	A	B	A	B	B	B
BS00029098	2A	218.9	A	A	B	A	A	B	B	B	B	A	A	B	B	B	A	B	-	A	A	B	A	B	B	A	B	A	A	A	A	B	A	B	A	A	A	-	-	B	B	B	B	A	B	A	B	B	B
BS00112337	2A	218.9	A	A	-	A	A	B	B	B	B	A	A	B	B	B	A	B	-	A	A	B	A	B	B	A	B	A	A	A	A	B	A	B	A	A	A	-	A	B	B	B	B	-	B	A	B	B	B
BS00084881	2A	230.6	-	A	-	B	B	A	B	A	B	-	-	B	B	B	A	B	-	B	A	B	A	B	B	A	B	A	A	A	A	B	A	B	A	A	B	-	-	B	B	-	B	A	B	A	B	-	-
BS00080917	2A	233.8	A	A	B	B	B	A	B	A	B	A	B	B	B	B	A	B	-	-	A	B	A	B	B	A	B	A	A	A	-	B	A	B	A	A	B	A	A	A	B	A	-	A	B	A	B	A	A
BS00090594	2B	0	B	A	B	B	B	A	A	A	B	A	B	B	B	A	A	B	-	A	B	A	A	A	A	B	A	A	B	B	A	A	A	B	-	B	A	A	A	B	B	A	A	A	A	B	B	A	A
BS00072472	2B	4.6	B	A	B	B	B	A	A	A	B	B	B	B	B	A	A	B	-	A	B	A	A	A	A	B	A	A	B	B	A	A	A	B	A	B	A	B	B	B	B	B	A	A	A	B	B	A	A
BS00076858	2B	4.6	B	A	-	B	B	A	A	A	B	B	B	B	B	A	A	B	-	A	B	A	A	A	A	B	A	A	-	-	A	A	-	-	A	B	A	-	-	B	B	-	-	-	A	B	B	A	A
BS00099469	2B	4.6	B	A	B	-	-	A	A	A	B	B	B	B	B	A	A	B	-	A	B	A	A	A	A	B	A	A	B	B	A	A	A	B	A	B	A	-	B	B	B	B	A	A	A	B	-	A	A
BS00095004	2B	6.8	B	A	B	B	B	A	A	A	B	A	B	B	B	A	A	B	-	A	B	A	A	A	-	B	A	A	B	B	A	A	A	B	A	B	A	B	B	B	B	B	A	A	A	B	B	A	A
BS00010734	2B	9.7	B	A	B	B	-	A	A	A	B	A	B	B	B	A	A	B	B	-	-	A	A	A	A	-	A	A	B	B	A	A	A	B	A	B	A	B	B	-	B	B	A	A	A	B	B	A	A
BS00046538	2B	9.7	B	A	B	B	A	A	A	A	B	A	B	B	B	A	A	B	-	A	B	A	A	A	A	B	A	A	B	B	A	A	A	B	A	B	A	B	B	B	B	B	A	A	A	B	B	A	A
bArc035	2B	10.8	B	A	B	B	A	-	-	A	B	A	B	-	-	A	A	-	B	-	-	A	-	-	A	B	A	-	B	-	A	-	A	-	A	B	-	-	B	B	A	B	-	-	-	-	-	-	A
BS00009972	2B	10.8	B	A	B	B	A	A	A	A	B	A	B	B	B	A	A	B	B	-	-	A	A	A	A	-	A	-	B	B	A	A	A	B	A	B	A	B	B	-	-	B	A	A	A	B	B	A	A
BS00023068	2B	10.8	B	A	B	B	-	A	A	A	B	A	B	B	B	A	A	B	B	A	B	A	A	A	A	B	A	A	B	B	A	-	A	B	A	-	A	B	-	B	-	B	A	A	A	-	B	A	A
BS00027693	2B	10.8	B	A	B	B	A	A	A	A	B	A	B	B	B	A	A	B	-	A	B	A	A	A	A	B	A	A	B	B	A	A	A	B	A	B	A	B	B	B	B	B	A	A	A	B	B	A	A
BS00084668	2B	10.8	B	A	B	B	A	A	A	A	B	A	B	B	B	A	A	B	-	A	B	A	A	A	A	B	A	A	B	B	A	A	A	B	A	B	A	-	-	B	B	-	A	A	A	B	-	A	A
gwm210A	2B	10.8	B	A	B	B	A	A	A	A	B	A	B	B	B	A	A	B	B	A	B	A	A	A	A	B	A	A	B	B	A	A	A	B	A	B	-	B	B	B	B	B	A	A	A	B	B	A	A
wmc489	2B	10.8	B	A	B	B	A	-	-	A	B	A	B	-	-	A	A	-	B	-	-	A	-	-	A	B	A	-	B	-	A	-	A	-	A	B	-	-	B	B	B	B	-	-	-	-	-	-	A
BS00065898	2B	11.9	B	A	B	B	A	A	A	A	B	A	B	B	B	A	A	B	-	A	B	A	A	A	A	B	A	A	B	B	A	A	A	B	A	B	A	B	B	B	A	B	A	A	A	B	B	A	A
BS00081871	2B	11.9	B	A	-	B	-	A	A	A	B	A	B	B	B	A	A	B	-	A	B	A	A	A	A	B	A	A	B	B	A	A	A	B	A	B	A	B	B	B	A	B	A	A	A	B	-	A	A
AFLP43-160bp	2B	12.5	B	A	B	B	A	-	-	A	B	A	B	-	-	A	A	-	B	-	-	A	-	-	A	B	A	-	B	-	A	-	A	-	A	B	-	-	B	B	A	B	-	-	-	-	-	-	A
wPt-3388	2B	12.5	B	A	B	B	A	A	A	A	B	A	B	B	B	A	A	B	B	A	B	A	A	A	A	B	A	A	B	B	A	A	A	B	A	B	-	B	B	B	A	B	-	A	A	B	B	A	A
BS00010318	2B	21.2	A	A	B	B	A	A	A	A	B	A	B	B	B	A	A	B	B	-	-	A	A	A	A	-	-	-	B	B	A	-	A	B	B	B	A	B	B	-	A	B	A	A	A	B	B	A	A
BS00010711	2B	21.2	-	A	B	B	A	-	A	A	B	-	B	-	B	-	A	B	B	-	B	A	A	A	A	-	A	A	B	-	-	B	A	B	B	B	A	B	B	-	A	B	A	A	A	-	B	A	A
BS00070900	2B	21.2	A	A	B	B	A	A	A	A	B	A	B	B	B	A	A	B	-	A	B	A	A	A	A	B	A	A	B	B	A	B	A	B	B	B	A	B	B	B	A	-	A	A	A	B	B	A	A
BS00002660	2B	21.7	A	A	B	B	A	A	A	A	B	A	B	B	B	A	A	B	B	-	-	A	A	A	A	-	A	A	B	B	A	B	A	B	B	B	A	B	B	-	A	B	A	A	A	B	B	A	A
BS00045163	2B	23.4	A	A	B	B	A	A	A	A	B	A	-	B	B	A	A	B	-	A	B	A	A	A	A	B	A	A	B	B	A	B	A	B	B	B	A	A	B	B	A	B	A	A	A	B	B	A	A
BS00073542	2B	23.4	A	A	B	B	A	A	A	A	B	A	B	B	B	A	A	B	-	A	B	A	A	A	A	B	A	A	B	B	A	B	A	B	B	B	A	-	-	B	A	B	A	A	A	B	B	A	A
BS00022059	2B	26.1	A	A	B	B	A	A	A	A	B	A	B	B	-	A	-	-	B	A	B	-	A	A	A	-	A	-	-	B	-	B	A	B	B	-	A	-	B	-	A	B	A	A	-	-	B	A	A
BS00053520	2B	26.8	-	A	B	-	A	A	A	A	B	A	B	B	B	A	A	B	-	A	B	A	A	A	A	B	A	A	B	B	A	B	A	B	B	B	A	-	B	B	A	B	A	A	A	B	-	A	A
BS00066324	2B	26.8	A	A	B	B	A	A	A	A	B	A	-	B	B	A	A	-	-	A	B	A	A	A	A	B	A	A	-	-	A	-	A	B	B	B	A	B	-	B	A	-	A	A	A	B	-	A	A
BS00003833	2B	28.7	A	A	B	B	A	A	A	A	B	A	B	B	B	A	A	B	B	-	-	A	A	A	A	-	A	-	B	B	-	B	A	B	B	B	A	B	B	-	A	B	A	A	A	B	B	-	A
BS00006788	2B	28.7	A	A	B	-	A	A	A	A	B	A	B	B	B	A	A	B	-	A	B	A	A	A	A	B	A	B	B	B	A	B	A	B	B	B	A	-	B	B	A	B	A	A	A	B	B	A	A
BS00009263	2B	28.7	A	A	B	B	A	A	A	A	B	A	-	B	B	A	A	B	B	-	B	A	A	A	A	-	A	B	B	B	A	-	-	B	B	-	A	B	B	-	A	B	-	A	A	-	B	A	A
BS00010637	2B	28.7	A	A	B	B	A	A	A	A	B	A	B	B	B	A	A	B	B	-	-	A	A	A	-	-	A	B	B	B	A	B	A	B	B	B	A	B	B	-	A	B	A	A	A	B	B	A	A
BS00010700	2B	28.7	A	A	B	B	A	A	A	A	B	A	B	B	B	A	A	B	B	-	B	A	A	A	A	-	A	B	B	B	A	B	A	B	B	B	A	B	B	-	A	B	A	A	A	B	B	A	A
BS00012209	2B	28.7	A	A	B	B	A	A	A	A	B	A	B	B	B	A	A	B	B	-	-	A	A	A	A	-	A	B	B	B	A	B	A	B	B	B	A	B	B	-	A	B	A	A	A	B	B	A	A
BS00022493	2B	28.7	A	A	B	B	A	A	A	A	B	A	B	B	B	A	A	B	B	A	B	A	A	A	A	B	A	B	B	B	A	B	A	B	B	B	A	B	B	B	A	B	A	A	A	-	B	A	A
BS00063108	2B	28.7	A	A	B	B	A	A	A	A	B	A	B	B	B	A	A	B	-	-	B	A	A	A	A	B	-	B	-	B	A	B	A	B	-	B	A	-	-	B	A	-	A	A	A	B	B	A	A
BS00063694	2B	28.7	A	A	B	B	A	A	A	A	B	A	B	B	B	A	A	B	-	A	B	A	A	A	A	B	A	B	B	B	A	B	A	B	B	B	A	-	-	B	A	-	-	A	A	B	-	A	A
BS00065040	2B	28.7	A	A	B	B	A	A	A	A	B	A	B	B	B	A	A	B	-	A	B	A	A	A	A	B	A	B	B	B	A	B	A	B	B	B	A	B	B	B	A	B	A	A	A	B	B	A	A
BS00070969	2B	28.7	A	A	-	B	A	A	A	A	B	A	B	B	B	A	A	B	-	A	B	A	A	A	A	B	A	B	B	B	A	B	A	B	B	B	A	B	B	B	A	B	A	A	A	B	B	A	A
BS00003719	2B	29.9	A	A	B	B	A	A	A	A	B	A	B	B	B	B	A	B	B	-	-	-	A	A	A	-	A	B	B	B	A	B	B	B	B	B	A	B	B	-	A	A	A	A	A	B	B	A	A
BS00009801	2B	29.9	A	A	B	B	A	A	A	A	B	A	B	B	B	B	A	B	B	-	-	A	A	A	A	-	A	-	B	B	A	B	B	B	B	B	A	B	B	-	A	A	A	A	A	B	B	A	A
BS00009848	2B	29.9	A	A	B	B	A	A	A	A	B	A	B	B	B	B	A	B	B	-	B	A	A	A	A	-	A	B	B	B	A	B	B	B	B	B	A	B	B	-	A	A	A	A	A	B	B	A	A
BS00022330	2B	29.9	A	A	B	-	-	A	A	A	B	A	B	-	B	B	A	B	B	A	B	A	A	-	A	B	A	B	B	B	A	B	B	B	B	B	A	B	B	B	A	A	A	A	A	B	B	A	-
BS00023025	2B	29.9	-	A	B	B	-	-	A	A	B	A	B	B	B	B	A	B	B	A	B	A	A	A	A	B	-	B	-	B	A	B	B	B	B	B	A	B	B	B	A	A	A	A	A	B	B	A	-
BS00023718	2B	29.9	A	A	B	B	-	A	A	A	B	A	B	B	B	B	A	B	-	A	B	A	A	A	A	B	A	B	B	B	A	B	B	B	-	B	A	-	B	-	A	-	-	-	A	B	B	A	A
BS00049914	2B	29.9	A	A	-	B	A	A	A	A	B	A	B	B	B	B	A	B	-	A	B	A	A	A	A	B	A	B	B	B	A	B	B	B	B	B	A	-	-	B	A	A	A	A	A	B	B	A	A
BS00062696	2B	29.9	A	A	B	B	A	A	A	A	B	A	B	B	B	B	A	B	-	A	B	A	A	-	A	B	A	B	B	B	A	B	B	B	B	B	A	B	B	B	A	A	A	A	A	B	B	A	A
BS00071650	2B	29.9	A	A	B	B	A	A	A	A	B	A	B	B	B	B	A	B	-	A	B	A	A	A	A	B	A	B	B	B	A	B	B	B	B	B	A	-	-	B	A	-	-	A	A	B	B	A	A
BS00078519	2B	29.9	A	A	B	B	A	A	A	A	B	A	-	B	B	B	A	B	-	A	B	A	A	A	A	B	A	B	B	B	A	B	B	B	B	B	A	B	B	B	A	A	A	A	A	B	B	-	A
BS00080804	2B	29.9	A	A	-	B	A	A	A	A	B	A	-	B	B	B	A	B	-	A	B	A	A	A	A	B	A	B	B	B	A	B	B	B	B	B	A	-	B	B	A	A	A	A	A	B	B	A	A
BS00100939	2B	29.9	A	A	B	B	A	A	A	A	B	A	B	B	B	B	A	B	-	A	B	A	A	A	A	B	A	B	B	B	A	B	B	B	B	B	A	B	B	B	A	A	A	A	A	-	B	A	A
BS00110268	2B	29.9	A	A	B	B	A	A	A	A	B	A	-	B	B	B	A	B	-	A	-	A	A	A	A	B	A	B	B	B	A	B	B	B	B	B	A	B	B	B	A	A	A	A	A	B	B	A	A
wmc243c	2B	29.9	A	A	B	B	A	A	A	A	B	A	B	B	B	B	A	B	B	A	B	A	A	A	A	B	A	B	B	B	A	B	B	B	B	B	-	B	B	B	A	A	A	A	A	B	B	A	A
BS00024100	2B	30.5	-	A	B	B	A	A	A	A	B	A	B	B	B	B	B	B	-	A	B	A	A	A	A	B	A	B	B	B	A	B	B	B	B	B	A	B	B	B	A	A	A	A	A	B	B	A	A
BS00076982	2B	30.5	A	A	-	B	A	A	A	A	B	A	B	B	B	B	B	B	-	A	B	A	A	-	A	B	A	B	-	B	A	B	-	-	B	-	A	-	-	B	A	-	A	A	A	B	B	A	A
BS00064658	2B	43.8	A	B	B	B	A	A	A	B	B	A	B	B	B	B	B	B	-	A	B	A	A	A	-	A	A	B	B	B	A	B	B	B	B	B	A	B	B	A	A	A	A	A	A	B	B	A	A
BS00012081	2B	44.4	-	B	B	B	A	A	A	-	B	A	B	B	B	B	B	B	B	-	B	A	A	A	-	-	A	B	B	B	A	B	B	B	B	B	A	B	B	-	A	A	A	A	A	B	B	A	A
BS00022950	2B	45.8	A	B	B	B	-	A	A	B	B	A	B	B	B	B	B	B	B	A	B	A	A	A	A	A	A	B	B	B	A	B	B	B	B	B	A	B	B	A	A	A	A	A	A	-	B	A	A
BS00043730	2B	45.8	-	B	-	-	A	A	A	B	B	A	B	B	B	B	B	B	-	A	B	A	A	A	A	A	A	-	B	B	A	B	B	-	B	B	A	B	B	A	A	A	A	A	A	B	B	A	-
BS00071995	2B	45.8	A	B	B	B	-	A	A	B	B	-	-	B	B	B	B	B	-	A	-	A	A	A	-	A	A	B	-	B	A	B	-	B	B	B	A	-	-	A	A	-	A	A	A	B	B	A	A
gwm257	2B	46.9	A	B	B	B	A	A	A	B	B	A	B	B	B	B	B	B	B	A	B	A	A	A	A	A	A	B	B	B	A	B	B	B	B	B	-	B	B	A	A	A	A	A	A	B	B	A	A
wPt-3561	2B	56	-	B	B	B	A	A	B	B	B	A	B	B	B	B	-	B	-	A	-	B	A	A	A	A	A	B	B	B	A	B	B	B	B	B	-	B	A	A	A	A	A	B	A	B	B	A	A
BS00064156	2B	56.6	A	B	B	B	A	A	B	B	B	A	B	B	B	B	B	B	-	A	B	B	A	A	A	A	A	B	B	B	A	B	B	B	B	B	A	B	A	A	A	A	A	B	A	B	B	A	-
BS00009807	2B	57.2	A	B	B	B	A	A	B	B	B	A	B	B	B	B	B	B	B	-	B	B	-	A	A	-	A	B	B	B	A	-	B	B	B	B	A	B	A	-	A	A	A	B	A	B	B	-	-
BS00012078	2B	57.2	A	-	B	B	A	A	B	-	-	A	B	B	B	B	B	B	B	-	B	B	A	A	A	-	A	B	B	B	A	B	B	B	B	B	A	B	A	-	A	A	A	B	A	B	B	A	A
BS00014974	2B	57.2	-	B	B	-	-	-	B	B	B	A	-	-	-	B	B	B	B	-	B	B	A	A	A	-	A	B	B	B	-	B	B	-	B	B	A	B	A	-	A	A	-	-	-	-	-	A	A
BS00022060	2B	57.2	A	-	B	B	A	A	B	B	B	A	B	B	B	B	B	B	B	A	B	B	A	A	A	-	-	B	B	B	A	-	B	B	B	B	A	B	A	A	A	A	A	B	A	B	A	A	-
BS00022734	2B	57.2	A	B	-	B	A	A	B	B	B	A	-	B	B	B	B	B	B	A	B	B	A	A	A	A	A	B	B	B	A	B	B	B	B	B	A	B	A	A	A	A	A	B	A	B	-	-	-
BS00064155	2B	57.2	A	B	B	B	A	A	B	B	B	A	B	B	B	B	B	B	-	A	B	B	A	A	A	A	A	B	B	B	A	B	-	B	-	B	A	-	A	A	A	A	-	B	A	B	B	A	A
BS00066626	2B	57.2	A	B	B	B	A	A	B	B	B	A	-	B	B	B	B	B	-	A	B	B	A	A	A	A	A	B	B	B	A	B	B	B	B	B	A	B	A	A	A	A	A	B	A	B	B	A	A
BS00010688	2B	61.4	A	B	B	B	A	A	B	B	B	A	B	B	B	B	B	A	B	-	A	B	A	-	A	-	A	-	B	B	-	B	B	-	B	B	A	B	A	-	A	A	A	A	A	B	A	A	-
BS00038820	2B	63.4	A	B	B	B	A	A	B	B	B	A	B	B	B	B	B	A	-	A	A	B	A	B	A	A	A	B	B	B	A	B	B	B	B	B	A	B	A	A	A	A	A	A	A	B	A	A	A
eACTmCAC310	2B	64.8	A	B	B	-	-	-	-	B	B	A	B	-	-	B	B	-	A	-	-	B	-	-	A	A	A	-	B	-	A	-	B	-	B	B	-	-	A	A	A	A	-	-	-	-	-	-	A
BS00042829	2B	66.2	A	B	B	B	A	A	B	B	B	-	-	B	A	B	B	A	-	A	A	B	A	B	A	A	A	B	B	B	A	B	B	B	B	B	A	B	A	A	A	A	A	A	A	B	A	B	A
BS00010055	2B	68	A	B	B	B	A	A	B	B	B	A	B	B	A	B	B	A	B	-	-	B	A	B	A	-	A	-	B	B	A	-	B	A	B	B	A	B	A	-	A	A	A	A	A	B	A	B	A
BS00026412	2B	68.6	A	B	B	B	A	A	B	B	B	A	B	B	A	B	B	A	-	A	A	B	A	B	A	A	A	B	B	B	A	B	B	A	B	B	A	B	A	A	A	A	A	A	A	B	A	B	B
BS00073842	2B	72.8	A	B	B	B	A	-	B	B	B	A	B	B	-	B	B	B	-	A	A	B	A	B	A	A	A	A	B	B	A	B	B	A	B	B	A	B	A	A	A	A	-	-	A	B	A	B	B
BS00074661	2B	72.8	A	B	B	B	A	A	B	B	B	A	B	B	A	B	B	B	-	A	A	B	A	B	A	A	A	A	B	B	A	B	B	A	B	B	A	B	A	A	A	A	A	A	A	B	A	B	B
BS00021959	2B	74.1	A	B	B	B	-	A	B	B	B	-	B	B	A	B	B	B	B	A	A	B	A	B	A	A	A	A	B	B	A	B	B	A	B	B	A	B	A	A	A	A	A	A	A	B	A	B	-
BS00098490	2B	74.1	A	B	-	B	A	A	B	B	B	-	B	-	A	B	B	B	-	A	A	B	A	B	A	A	A	A	B	B	A	B	B	A	B	B	A	B	A	A	A	A	A	A	A	B	-	B	-
BS00104020	2B	74.1	A	B	B	B	A	A	B	B	B	A	B	B	A	B	B	B	-	A	A	B	A	B	A	A	A	A	-	B	A	B	B	A	B	B	A	-	A	A	A	-	A	A	A	B	A	B	B
wPt-0335	2B	76.5	-	B	B	B	A	A	B	B	B	A	B	B	A	B	B	B	A	A	A	B	A	B	A	A	A	A	B	B	A	B	B	A	B	B	-	B	A	A	A	A	-	A	A	B	A	B	A
s17TCAC	2B	77	A	B	B	B	A	A	B	B	B	A	B	B	A	B	B	B	A	A	A	B	A	B	A	A	A	A	B	B	A	B	B	A	B	B	-	B	A	B	A	A	B	A	A	B	A	B	A
BS00034314	2B	78.2	A	B	B	B	A	A	B	B	B	A	B	B	A	B	B	B	-	A	A	B	A	B	A	A	A	A	B	B	A	B	B	A	B	B	A	B	A	B	A	A	B	A	A	B	A	B	A
BS00004433	2B	78.7	A	B	B	B	A	A	B	B	B	A	B	B	A	B	B	B	A	-	A	B	A	B	A	-	A	A	B	B	A	B	B	A	B	B	A	B	A	-	A	A	B	A	A	B	A	B	A
BS00009305	2B	78.7	A	B	B	B	A	A	B	B	B	A	B	B	A	B	B	B	A	-	-	B	A	B	A	-	A	A	B	B	A	B	B	A	B	B	A	B	A	-	A	A	B	A	A	B	A	B	A
BS00009962	2B	78.7	A	B	B	B	A	A	B	B	B	A	-	-	-	B	B	B	A	-	A	B	-	B	A	-	A	A	B	-	A	B	B	A	B	B	A	B	A	-	A	A	B	A	A	-	A	B	A
BS00010219	2B	78.7	A	B	B	B	A	A	B	B	B	A	B	B	A	B	B	B	A	-	A	B	A	B	A	-	A	A	B	B	A	B	B	A	B	B	A	B	A	-	A	A	B	A	A	B	A	B	A
BS00010829	2B	78.7	A	B	B	B	A	A	B	B	-	A	B	B	A	B	B	B	A	-	A	B	A	B	A	-	A	A	B	B	A	B	B	A	B	B	A	B	A	-	A	A	B	A	A	B	A	B	A
BS00010916	2B	78.7	-	B	B	B	A	A	B	B	B	A	B	B	A	B	B	B	A	-	A	B	A	-	A	-	A	A	B	-	A	B	B	A	B	B	A	B	-	-	A	A	B	A	A	B	A	B	-
BS00011039	2B	78.7	A	B	B	B	A	A	-	B	B	A	B	B	A	B	B	B	A	-	A	B	A	B	A	-	A	A	B	B	A	B	B	A	B	B	A	B	A	-	A	A	B	A	A	B	A	B	B
BS00011187	2B	78.7	A	B	B	B	A	A	B	B	B	A	B	B	A	B	B	B	A	-	A	B	A	B	A	-	A	A	B	B	A	B	B	A	B	B	A	B	A	-	A	A	B	A	A	B	A	B	B
BS00041323	2B	78.7	A	B	B	B	-	A	B	B	B	A	B	B	A	B	B	B	-	A	A	B	A	B	A	A	A	A	B	B	A	B	B	A	B	B	A	B	A	B	A	A	B	A	A	B	-	-	B
cfd73	2B	78.7	A	B	B	B	A	A	B	B	B	A	B	B	A	B	B	B	A	A	A	B	A	B	A	B	A	A	B	B	A	B	B	A	B	B	-	B	A	-	-	A	-	-	-	-	-	-	-
BS00009247	2B	80.7	A	B	B	B	A	A	B	B	B	A	B	B	A	B	B	B	A	-	-	B	A	B	A	-	A	-	B	B	A	B	B	A	B	B	A	B	A	-	A	A	B	A	A	B	A	B	A
BS00009461	2B	80.7	A	B	B	B	A	A	B	B	B	A	B	B	A	B	B	B	A	-	-	B	A	B	A	-	A	-	B	B	A	B	B	A	B	B	A	B	A	-	A	A	B	A	A	B	A	B	A
BS00010567	2B	80.7	A	B	B	B	A	A	B	B	B	A	B	B	A	B	B	B	A	-	A	B	A	B	A	-	A	A	B	-	A	B	B	A	B	B	A	B	A	-	A	A	B	A	A	B	A	B	A
BS00011275	2B	80.7	A	B	B	B	A	A	B	B	B	A	B	B	A	B	B	B	A	-	A	B	A	B	A	-	A	A	B	B	A	B	B	A	B	B	A	B	A	-	A	A	B	A	A	B	A	-	A
BS00047890	2B	80.7	A	B	B	B	A	A	B	B	B	A	B	B	A	B	B	B	-	A	A	B	A	B	A	B	A	-	B	B	A	B	B	A	B	B	A	B	A	A	A	A	B	A	A	B	A	B	A
BS00075832	2B	80.7	A	B	B	B	A	A	B	B	B	A	-	B	A	B	B	B	-	A	A	B	A	B	A	A	A	A	B	B	A	B	B	A	B	B	A	B	A	A	A	A	B	A	A	B	A	B	A
BS00079013	2B	80.7	A	-	B	B	-	A	B	B	B	A	B	B	A	B	B	B	-	A	A	B	A	B	A	A	A	A	B	B	A	B	B	A	B	B	A	B	A	A	A	A	B	A	A	B	A	B	A
BS00105409	2B	80.7	A	B	B	B	-	A	B	B	B	A	B	B	A	B	B	B	-	A	A	B	A	B	A	A	A	A	B	B	A	B	B	A	B	B	A	B	A	A	A	A	B	A	A	B	A	B	-
BS00011737	2B	81.2	A	B	B	B	A	A	B	B	B	A	B	B	A	B	B	B	A	-	A	B	A	B	A	-	A	A	B	B	A	B	B	A	B	B	A	B	A	-	A	A	B	A	A	B	A	B	-
BS00011757	2B	81.2	-	B	B	B	A	A	B	-	B	A	B	B	A	B	B	B	A	-	A	B	A	B	A	-	A	A	B	-	A	B	B	A	B	B	A	B	A	-	A	A	B	A	A	B	A	B	A
BS00021713	2B	81.2	A	B	B	B	A	A	B	B	B	A	B	B	A	B	B	B	A	-	A	B	A	B	A	-	A	A	B	-	A	B	B	A	B	B	A	B	-	-	A	A	B	A	A	B	A	-	-
BS00022014	2B	81.2	A	B	B	B	-	-	B	B	B	A	B	B	A	B	B	B	A	A	A	B	A	B	A	A	-	A	-	B	A	B	B	A	B	B	A	B	A	A	A	A	B	A	A	B	A	-	A
BS00022295	2B	81.2	A	B	B	B	-	A	B	B	B	A	B	B	A	B	B	B	A	A	A	B	A	B	A	A	A	A	B	B	A	B	B	A	B	B	A	B	A	A	A	A	B	A	A	B	A	B	A
BS00022765	2B	81.2	A	B	B	B	A	A	B	-	B	A	B	B	A	B	B	B	A	A	A	B	A	B	A	A	A	A	B	B	A	B	B	A	B	B	A	B	A	A	A	A	B	A	A	B	A	B	-
BS00067591	2B	81.2	A	B	B	B	A	A	B	B	B	A	B	B	A	B	B	B	-	A	A	B	A	B	A	A	A	A	B	B	A	B	B	A	B	B	A	B	A	A	A	A	B	A	A	B	A	B	A
BS00022335	2B	81.7	-	B	B	B	A	A	B	B	B	A	B	-	A	B	B	B	-	A	A	B	A	-	A	A	A	A	B	B	A	B	B	A	B	B	A	B	A	A	A	A	B	A	A	B	A	B	-
BS00022781	2B	81.7	A	B	B	-	A	A	B	B	B	A	B	-	-	B	B	B	A	A	A	B	A	B	A	A	A	A	B	B	A	B	B	A	B	B	A	B	A	A	A	A	B	A	A	B	A	B	A
BS00022002	2B	82.3	A	B	B	B	-	A	B	B	B	A	B	B	A	B	B	B	A	A	A	B	A	B	A	A	A	A	B	B	A	B	B	A	-	B	A	B	A	A	-	A	B	A	A	-	A	B	-
BS00022091	2B	82.3	A	B	B	B	A	A	B	B	B	A	B	B	A	B	B	B	A	A	A	B	A	B	A	A	A	A	B	B	A	B	B	A	B	B	A	B	A	A	A	A	B	A	A	B	A	B	A
BS00022350	2B	82.3	A	-	B	B	A	A	B	B	B	A	B	B	A	B	B	B	A	-	A	B	A	B	A	A	A	A	B	B	A	B	B	A	B	B	A	B	A	A	A	A	B	A	A	B	A	B	A
BS00022558	2B	82.3	A	B	B	B	A	A	B	B	B	A	B	B	A	B	B	B	A	A	A	B	A	B	A	A	A	A	B	B	A	B	B	A	B	B	A	B	A	A	A	A	B	A	A	B	A	B	A
BS00022819	2B	82.3	A	B	B	B	B	-	B	B	B	-	B	B	A	B	B	B	A	A	A	B	A	B	A	A	A	A	B	B	A	B	B	A	B	B	A	B	A	A	A	A	B	A	A	B	A	B	B
BS00023145	2B	82.3	A	B	B	-	A	A	B	B	B	A	-	B	A	B	B	B	A	A	A	B	A	B	A	A	A	A	B	B	A	B	B	A	B	B	A	B	A	A	A	A	B	A	A	B	A	-	-
I-04-5W2	2B	82.3	A	B	B	B	A	-	B	B	B	A	B	B	A	B	B	B	A	A	A	B	A	B	A	A	A	A	B	B	A	B	B	A	B	B	-	B	A	A	A	A	B	A	A	B	A	B	A
wmc175A	2B	82.9	A	B	B	B	A	A	B	B	B	A	B	B	A	B	B	B	A	A	A	B	A	B	A	A	A	A	B	B	A	B	B	A	B	B	-	B	-	A	A	A	B	A	A	B	A	B	A
BS00009989	2B	83.5	A	B	B	B	A	A	B	B	B	A	B	B	A	B	B	B	A	-	A	B	A	B	A	-	A	A	B	B	A	B	B	A	B	B	A	B	A	-	A	A	B	A	A	B	A	B	A
BS00011630	2B	83.5	A	B	B	B	A	A	B	B	-	A	B	B	A	B	B	B	A	-	A	B	A	B	A	-	A	A	B	B	A	B	B	A	B	B	A	B	A	-	A	A	B	A	A	B	A	-	B
BS00023968	2B	83.5	A	B	B	-	-	A	B	B	B	A	B	B	A	B	B	B	-	A	A	B	A	B	A	A	A	A	B	B	A	B	B	A	B	B	A	B	A	A	A	A	B	A	A	B	A	-	A
BS00064267	2B	83.5	-	-	-	-	-	-	B	B	B	A	B	B	A	B	B	B	-	A	A	B	A	B	A	A	A	A	B	B	A	B	B	A	B	B	A	B	A	A	A	A	B	A	A	-	-	-	-
BS00011229	2B	84	A	B	B	B	A	A	B	B	B	A	B	B	A	B	B	B	A	-	A	B	A	B	A	-	A	A	B	B	A	B	B	A	B	B	A	B	A	-	A	A	B	A	A	B	A	B	A
BS00019285	2B	84	A	B	B	-	A	-	-	B	B	A	-	B	-	B	B	B	A	-	A	B	A	-	-	-	A	-	B	B	A	-	-	-	-	B	-	B	-	-	A	-	-	A	-	-	A	B	-
BS00074789	2B	84	A	B	B	B	A	A	B	B	B	A	B	B	A	B	B	B	A	A	A	B	A	B	A	A	A	A	B	B	A	B	B	A	B	B	A	B	A	A	A	A	B	A	A	B	A	B	B
wPt-5680	2B	84.8	-	B	B	B	A	A	B	B	B	A	B	-	A	B	B	B	A	A	A	B	-	B	A	A	A	A	B	-	A	B	B	A	B	B	-	B	A	A	A	A	B	A	A	B	-	B	A
wPt-8569	2B	85.4	-	B	B	B	A	A	B	B	B	A	B	B	A	B	B	B	A	A	A	B	A	B	A	A	A	A	B	B	A	B	B	A	B	B	-	B	A	A	A	A	B	A	A	B	A	B	A
wPt-3132	2B	86.5	A	B	B	B	A	A	B	B	B	A	B	B	A	B	B	B	A	A	A	B	A	B	A	A	A	A	B	B	A	B	B	A	B	B	-	B	A	A	A	A	B	A	A	B	A	B	A
BS00011958	2B	87.2	A	B	B	B	A	A	B	B	B	A	B	B	A	B	B	B	A	-	A	B	A	B	A	-	A	A	B	B	A	B	B	A	B	B	A	B	-	-	A	A	B	A	A	B	A	-	A
BS00011990	2B	87.2	A	B	B	B	A	A	B	B	B	A	B	B	A	B	B	B	A	-	A	B	A	B	A	-	A	A	B	B	A	B	B	A	B	B	A	B	-	-	A	A	B	A	A	B	A	-	A
BS00012103	2B	87.2	A	B	B	B	A	A	B	B	B	A	B	B	A	B	B	B	A	-	A	B	A	B	A	-	A	A	B	B	A	B	B	A	B	B	A	B	-	-	A	A	B	A	A	B	A	B	A
BS00016650	2B	87.2	-	B	B	B	A	A	B	-	-	A	-	B	A	B	-	B	A	-	A	B	-	-	A	-	A	A	B	B	A	B	B	A	B	B	A	B	-	-	A	A	B	A	A	B	A	-	A
BS00022707	2B	87.2	A	B	B	B	A	A	B	B	B	-	B	B	A	B	B	B	A	A	A	B	A	B	A	A	A	A	B	B	A	B	B	A	B	B	A	B	A	A	A	A	B	A	A	B	A	B	A
BS00063729	2B	87.2	A	B	B	B	A	A	B	B	B	A	B	B	A	B	B	B	-	A	A	B	A	B	A	A	-	A	-	B	A	B	-	A	-	B	A	-	A	A	A	-	B	A	A	B	A	B	A
BS00081013	2B	87.2	A	B	-	B	A	A	B	B	B	A	B	B	A	B	B	B	-	A	A	B	A	B	A	A	A	A	B	B	A	B	B	A	B	B	A	B	A	A	A	A	B	A	A	-	A	B	A
BS00086322	2B	87.2	A	B	B	B	A	A	B	B	B	A	B	B	A	B	B	B	-	A	A	B	A	B	A	A	A	A	B	B	-	B	B	A	B	B	A	-	-	A	A	-	B	A	A	B	A	B	A
BS00090234	2B	87.2	-	B	-	B	-	A	B	B	B	A	B	B	A	B	B	B	-	A	A	B	A	B	A	A	A	A	B	B	A	B	B	A	B	B	A	B	A	A	A	A	B	A	A	B	A	B	A
gwm501	2B	89.2	A	B	B	B	A	A	B	B	B	A	B	B	A	B	B	B	A	A	A	B	A	B	A	A	A	A	B	B	A	B	B	A	B	B	-	B	A	A	A	A	B	A	A	B	A	B	A
BS00009442	2B	92.4	A	B	B	B	A	A	B	B	B	A	B	B	A	B	B	B	A	-	A	B	A	B	A	-	A	A	B	A	-	B	B	A	B	B	A	B	A	-	A	A	B	A	A	B	A	-	A
BS00011315	2B	92.4	A	B	B	B	A	A	B	B	B	A	B	B	A	B	B	B	A	-	A	B	-	B	A	-	A	A	B	B	A	B	B	A	B	B	A	B	A	-	A	A	B	A	A	B	A	-	A
BS00012036	2B	92.4	A	-	B	B	A	A	B	B	-	-	B	B	A	B	B	B	A	-	A	B	-	-	A	-	A	A	B	-	A	B	B	A	B	B	A	B	-	-	A	A	B	A	A	B	A	-	-
BS00012071	2B	92.4	A	B	B	B	A	A	B	B	B	A	B	B	A	B	B	B	A	-	A	B	A	B	A	-	A	A	B	B	A	B	B	A	B	B	A	B	A	-	A	A	B	A	A	B	A	B	A
BS00035335	2B	92.4	A	B	-	B	A	A	B	B	B	A	B	B	A	B	B	B	-	A	A	B	A	B	A	A	A	A	B	B	A	B	B	A	B	B	A	-	A	A	A	A	B	A	A	B	A	B	A
BS00041922	2B	92.4	A	B	B	B	A	A	B	B	B	A	B	B	A	B	B	B	-	A	A	B	A	B	A	A	A	A	B	B	A	B	B	A	B	B	A	-	A	A	A	A	B	A	A	B	A	B	A
BS00053299	2B	92.4	A	B	B	B	A	A	B	B	B	A	B	B	A	B	B	B	-	A	A	B	A	B	A	A	A	A	B	B	A	B	B	A	B	B	A	B	A	A	A	A	B	A	A	B	A	B	A
BS00070861	2B	92.4	A	B	B	B	A	A	B	B	B	A	-	B	-	B	B	B	-	A	A	B	A	B	A	A	-	A	-	B	A	B	-	A	B	B	A	-	-	A	A	-	B	A	A	B	A	B	A
BS00073233	2B	92.4	A	B	B	B	A	A	B	B	B	A	B	B	A	B	B	B	-	A	A	B	A	B	A	A	A	A	B	B	A	B	B	A	B	B	A	B	A	A	A	A	B	A	A	B	A	B	A
BS00074390	2B	92.4	A	B	B	B	A	A	B	B	B	A	B	B	A	B	B	B	-	-	A	B	A	B	A	A	A	A	-	B	A	B	B	A	B	B	A	-	A	-	A	-	B	A	A	B	A	B	A
eACTmCAC500	2B	92.4	A	B	B	-	-	-	-	B	B	A	B	-	-	-	B	-	A	-	-	B	-	-	A	A	A	-	B	-	A	-	B	-	B	B	-	-	A	-	-	A	-	-	-	-	-	-	A
eACTmCAC502	2B	92.4	A	B	B	-	-	-	-	B	B	A	B	-	-	B	B	-	A	-	-	B	-	-	A	A	A	-	B	-	A	-	B	-	B	B	-	-	A	-	-	A	-	-	-	-	-	-	A
gwm120	2B	92.4	A	B	B	-	-	-	-	-	-	-	-	-	A	B	-	B	A	A	A	B	A	B	A	-	A	A	B	B	A	B	B	A	B	B	-	B	A	A	A	A	B	A	-	-	-	-	-
BS00003714	2B	93.1	A	B	B	B	A	A	B	B	B	A	B	B	A	B	B	B	A	-	-	B	A	B	A	-	A	A	B	B	A	-	B	A	B	B	A	B	A	-	A	A	B	A	A	B	A	B	B
BS00022010	2B	93.1	A	B	B	B	A	A	B	B	B	-	B	B	A	B	-	B	A	A	A	-	A	B	A	-	A	A	B	B	A	B	B	A	B	B	A	B	A	A	A	A	B	A	A	B	A	B	A
BS00022314	2B	93.1	A	B	-	B	A	A	B	B	B	A	B	B	A	B	B	-	A	A	A	-	A	B	A	A	A	A	B	B	A	B	B	A	B	B	-	B	A	A	-	A	B	A	-	B	A	B	A
BS00022712	2B	93.1	A	B	-	B	-	A	B	B	B	-	B	B	A	B	B	B	A	-	A	B	A	-	A	A	A	A	B	B	A	B	B	A	B	B	A	B	A	A	A	A	B	A	A	B	A	B	A
BS00057475	2B	93.1	A	B	B	B	A	A	B	B	B	A	-	B	A	B	B	B	-	A	-	B	A	B	A	A	A	A	B	-	A	B	-	-	B	B	A	B	-	A	A	B	B	A	A	B	A	B	A
BS00064448	2B	93.1	A	B	-	B	A	A	B	B	B	A	B	B	A	B	B	B	-	A	-	B	A	B	A	A	-	A	-	B	A	B	B	A	-	B	A	-	A	A	A	-	B	-	A	B	A	B	-
BS00067413	2B	93.1	A	B	B	B	A	A	B	B	B	A	-	B	A	B	B	B	-	A	A	B	A	B	A	A	A	A	B	B	A	B	-	A	B	B	A	-	-	A	A	-	B	-	A	B	A	B	A
BS00078909	2B	93.1	A	B	B	B	-	A	B	B	B	A	B	B	A	B	B	B	-	A	A	B	A	B	A	A	A	A	B	B	A	B	B	A	B	B	A	B	A	A	A	A	B	A	A	B	A	-	-
wPt-9736	2B	93.7	A	B	-	B	A	A	B	B	B	A	B	-	A	-	B	B	A	A	A	B	A	B	A	A	A	A	B	B	A	B	B	A	B	B	-	B	A	A	A	A	B	A	A	B	A	B	A
BS00003788	2B	94.4	A	B	B	B	A	A	B	B	B	A	B	B	A	B	B	B	A	-	A	B	A	B	A	-	A	A	B	B	A	B	B	A	B	B	A	B	A	-	A	A	B	A	A	B	A	B	B
BS00009258	2B	94.4	A	B	B	B	A	A	B	-	B	-	B	B	A	B	B	B	A	-	A	B	-	B	A	-	A	A	B	B	A	B	B	A	B	B	A	B	A	-	A	A	B	A	A	B	A	-	-
BS00010012	2B	94.4	A	B	B	B	A	A	B	B	B	A	B	B	A	B	B	B	A	-	A	B	A	B	A	-	A	A	B	B	A	B	B	A	B	B	A	B	A	-	A	A	B	A	A	B	A	B	B
BS00011954	2B	94.4	A	B	B	B	A	-	B	-	B	-	B	B	A	B	B	B	-	-	A	B	-	-	A	-	A	A	B	-	A	B	B	A	B	B	A	B	A	-	A	A	B	A	A	B	A	B	B
BS00022112	2B	94.4	-	B	B	B	A	A	B	B	B	-	B	B	A	B	B	B	A	A	A	B	A	-	A	A	A	A	B	B	A	B	B	A	B	B	A	-	A	A	A	A	B	A	A	B	A	B	B
BS00064607	2B	94.4	A	B	B	-	A	A	B	B	B	A	B	-	A	B	B	B	A	A	A	B	A	B	A	A	A	A	-	B	A	-	B	A	B	B	A	B	A	A	A	A	B	A	A	B	A	B	B
BS00022946	2B	95	A	B	B	-	-	-	B	B	B	A	B	A	A	B	B	B	A	A	A	B	A	B	A	A	A	-	B	B	A	-	B	-	B	B	A	B	A	A	A	A	B	A	A	B	A	B	-
BS00003810	2B	95.6	A	B	B	B	A	A	B	B	B	A	B	B	A	B	B	B	A	-	-	B	A	B	A	-	A	-	B	B	A	B	B	A	B	B	A	B	A	-	A	A	B	A	A	B	A	B	B
BS00009722	2B	95.6	A	B	B	B	A	A	B	B	B	A	B	B	A	B	B	B	A	-	A	B	A	B	A	-	A	A	B	B	A	B	B	A	B	B	A	B	A	-	A	A	B	A	A	B	A	-	B
BS00010303	2B	95.6	A	B	B	-	A	A	B	B	B	A	-	-	A	B	B	B	A	-	A	B	A	B	A	-	A	A	B	B	A	B	B	A	B	B	A	B	A	-	A	A	B	A	A	B	A	B	B
BS00011531	2B	95.6	A	B	B	B	A	A	B	B	B	A	B	B	A	B	B	B	A	-	A	B	A	B	A	-	A	A	B	B	A	B	B	A	B	B	A	B	A	-	A	A	-	A	A	B	A	B	B
BS00011709	2B	95.6	A	B	B	B	A	A	B	B	B	A	-	B	A	B	B	B	A	-	A	B	A	B	A	-	A	A	B	B	A	B	B	A	B	B	A	B	A	-	A	A	B	A	A	B	A	B	B
BS00021896	2B	95.6	A	B	B	B	A	A	B	B	B	A	B	B	A	B	B	B	A	-	A	B	A	B	A	-	A	A	B	B	A	B	B	A	B	B	A	B	A	-	A	A	B	A	A	B	A	B	B
BS00023124	2B	95.6	A	-	B	B	-	A	B	B	B	A	B	B	A	B	B	B	A	A	A	B	A	B	A	A	A	A	B	B	A	B	B	A	B	B	A	B	A	A	A	A	B	A	A	B	A	B	-
BS00044983	2B	95.6	A	B	B	B	A	A	B	B	B	A	-	B	A	B	B	B	-	A	A	B	A	B	A	A	A	A	-	B	A	B	B	A	B	B	A	B	A	A	A	A	B	A	A	B	A	B	B
BS00047070	2B	95.6	A	B	B	B	A	A	B	B	B	A	B	B	A	B	B	B	-	A	A	B	A	B	A	A	A	A	B	B	A	B	B	A	B	B	A	B	A	A	A	A	B	A	A	B	A	B	B
BS00064740	2B	95.6	A	B	B	B	A	-	B	B	B	A	B	B	A	B	B	B	-	A	A	B	A	B	A	A	A	A	B	-	A	-	-	-	-	-	A	-	-	A	A	-	-	A	A	B	A	B	B
BS00065136	2B	95.6	A	-	B	B	A	A	B	B	B	A	B	B	A	B	B	B	-	A	A	B	A	B	A	A	A	A	B	B	A	B	B	A	B	B	A	B	A	A	A	A	B	A	A	B	A	B	B
BS00110209	2B	99.2	A	B	A	B	A	A	A	B	B	A	B	B	A	B	B	B	-	A	A	B	A	B	A	A	A	A	B	B	A	B	B	A	B	B	A	B	B	A	A	A	B	A	A	B	A	B	B
BS00043338	2B	100.9	-	B	A	B	-	A	A	B	B	A	B	B	A	B	B	B	-	A	A	B	A	B	A	A	A	A	B	B	A	B	A	A	-	B	A	-	B	A	A	A	B	A	A	B	A	B	B
BS00009060	2B	101.5	A	B	A	B	A	A	A	B	B	A	-	B	A	B	B	B	-	A	A	B	A	B	A	A	A	A	B	B	A	B	A	A	B	B	A	-	B	A	A	-	B	A	A	B	A	B	A
BS00031461	2B	101.5	A	B	A	B	A	A	A	B	B	A	B	B	A	B	B	B	-	A	A	B	A	B	A	A	A	A	B	B	A	B	A	A	B	B	A	A	B	A	A	A	B	A	A	B	A	B	A
BS00003585	2B	102.6	A	B	A	B	A	A	A	B	B	A	B	B	A	B	B	B	A	-	-	B	A	B	A	-	A	A	B	B	A	-	A	A	B	B	A	B	B	-	A	A	B	-	A	B	A	B	-
BS00010432	2B	102.6	A	B	A	B	A	A	A	B	B	A	B	B	A	B	B	B	A	-	A	B	A	B	A	-	A	A	B	B	A	B	A	A	B	B	A	B	B	-	A	A	B	A	A	B	A	B	-
BS00010523	2B	102.6	A	-	A	B	-	A	-	B	B	A	-	B	A	-	B	B	A	-	A	B	A	B	A	-	A	A	B	-	A	B	A	-	B	B	A	B	B	-	A	A	B	A	A	-	A	B	A
BS00011430	2B	102.6	-	-	A	B	A	A	A	B	B	A	B	B	A	B	B	B	A	-	A	B	-	B	A	-	A	A	B	-	A	B	A	A	B	B	A	B	-	-	A	A	B	A	A	B	A	-	B
BS00011483	2B	102.6	A	B	A	B	A	A	A	B	B	A	B	B	A	B	B	B	A	-	A	B	A	B	A	-	A	A	B	B	A	B	A	A	B	B	A	B	B	-	A	A	B	A	A	B	A	B	B
BS00022064	2B	102.6	A	-	A	B	A	A	A	B	B	A	B	B	-	B	-	B	A	A	A	-	A	B	A	A	A	A	B	B	A	B	A	A	B	B	A	B	B	A	A	A	B	A	A	-	A	B	-
BS00049868	2B	102.6	A	B	A	B	A	A	A	B	B	A	B	B	A	B	B	B	-	A	A	B	A	B	A	A	A	A	B	B	A	-	A	A	B	B	A	B	B	A	A	A	B	A	A	B	A	B	A
BS00070104	2B	102.6	A	A	-	B	B	A	A	B	B	A	B	B	A	B	B	B	-	A	A	B	A	B	A	A	A	A	B	A	A	B	A	A	B	B	A	B	B	A	A	A	B	A	A	A	-	B	A
BS00082970	2B	102.6	A	B	A	B	A	A	A	B	B	A	-	B	A	B	B	B	-	A	A	B	A	B	A	A	A	A	-	B	A	B	-	-	B	B	A	B	B	A	A	-	B	A	A	B	A	B	B
BS00003589	2B	119.6	A	A	B	B	B	A	A	B	B	B	B	B	A	B	B	B	B	-	B	B	A	B	A	-	A	A	B	A	A	B	A	A	B	B	A	B	B	-	A	A	A	B	A	A	-	-	B
BS00003597	2B	119.6	A	A	B	B	B	A	A	B	B	B	B	B	A	B	B	B	B	-	-	B	A	B	A	-	A	A	B	A	A	B	A	A	B	B	A	B	B	-	A	A	A	B	A	A	A	A	B
BS00003673	2B	119.6	A	A	B	B	B	A	A	B	B	B	B	B	A	B	B	B	B	-	-	B	A	B	A	-	A	A	B	A	A	B	A	A	B	B	A	B	B	-	A	A	A	B	A	A	A	A	B
BS00004405	2B	119.6	A	A	B	B	B	A	A	B	B	B	B	B	A	B	B	B	B	-	-	B	A	B	A	-	A	A	B	A	A	B	A	A	B	B	A	B	B	-	A	A	A	B	A	A	A	A	B
BS00009437	2B	119.6	A	-	B	B	B	-	A	B	B	B	B	B	A	B	B	B	B	-	B	B	A	B	A	-	A	A	B	A	A	B	A	A	B	B	A	B	B	-	A	A	A	B	-	A	A	A	B
BS00009791	2B	119.6	A	A	B	B	-	A	A	B	B	B	B	B	A	B	B	B	B	-	-	-	A	B	A	-	A	A	B	A	A	B	A	A	B	B	A	B	B	-	A	A	A	B	A	A	A	A	B
BS00009864	2B	119.6	A	A	B	B	B	A	A	B	B	B	B	B	A	B	B	B	B	-	-	B	A	B	A	-	A	A	B	A	A	B	A	A	B	B	A	B	B	-	A	A	A	B	A	A	A	A	B
BS00010361	2B	119.6	A	A	B	B	B	A	A	B	B	B	B	B	A	B	B	B	B	-	B	B	A	B	A	-	A	A	B	A	A	B	A	A	B	B	A	B	B	-	A	A	A	B	A	A	A	A	B
BS00010640	2B	119.6	A	A	B	B	B	A	A	B	B	B	B	B	A	B	B	B	B	-	B	B	A	B	A	-	A	A	B	A	A	B	A	A	B	B	A	B	B	-	A	A	A	B	A	A	A	A	B
BS00011276	2B	119.6	A	A	B	B	B	A	-	B	B	B	B	B	A	B	B	B	B	-	B	B	A	B	A	-	A	A	B	A	A	B	A	A	B	B	A	B	-	-	A	A	A	B	A	A	A	A	B
BS00011858	2B	119.6	A	A	B	B	B	A	A	-	B	B	B	B	A	B	B	B	B	-	B	B	A	B	A	-	A	A	B	A	A	B	A	A	B	B	A	B	B	-	A	A	A	B	A	A	A	A	B
BS00021895	2B	119.6	A	A	B	B	B	A	-	B	B	B	B	B	A	B	B	B	B	-	B	B	A	B	A	-	A	A	B	A	A	B	A	A	B	B	A	B	-	-	A	A	A	B	A	A	A	A	B
BS00023946	2B	119.6	A	A	B	B	B	A	A	B	B	B	B	B	A	B	B	B	-	A	B	B	A	B	A	A	A	A	B	A	A	B	A	A	B	B	A	B	B	A	A	A	A	B	A	A	A	A	B
BS00023994	2B	119.6	A	A	B	B	-	A	A	B	B	B	B	B	A	B	-	B	-	A	B	B	A	B	A	A	A	A	B	A	A	B	A	A	B	B	A	B	B	A	A	A	A	B	A	A	A	-	B
BS00046601	2B	119.6	A	A	B	B	-	A	A	B	B	B	B	B	A	B	B	B	-	A	B	B	A	B	A	A	A	A	B	A	A	B	A	A	B	B	A	-	-	A	A	-	A	B	A	A	-	A	B
BS00080318	2B	119.6	A	A	B	-	-	A	A	B	B	B	B	B	A	B	B	B	-	A	B	B	A	B	A	A	A	-	B	A	A	-	A	A	B	B	A	-	B	A	A	A	A	B	A	A	A	A	B
BS00009519	2B	120.1	A	A	B	B	B	A	A	B	B	-	-	B	A	B	B	B	B	-	-	B	A	B	A	-	A	A	B	A	A	B	A	A	B	B	A	B	B	-	A	A	A	B	A	A	A	A	-
BS00009736	2B	120.1	A	A	B	B	B	A	A	B	B	-	B	B	-	-	B	-	B	-	B	B	A	B	A	-	-	A	-	A	-	-	A	-	B	B	A	B	B	-	A	-	-	-	-	-	A	A	B
BS00011047	2B	120.1	A	A	B	B	B	A	A	B	B	B	B	B	A	B	B	B	B	-	B	B	A	-	A	-	A	A	B	A	A	B	A	A	B	B	A	B	B	-	A	A	A	B	A	A	A	-	B
BS00022222	2B	120.1	A	A	B	B	B	A	A	B	B	-	B	B	A	B	B	-	B	A	B	-	A	-	-	-	A	A	B	A	A	B	A	A	B	B	A	B	B	-	A	A	A	B	A	-	A	A	B
wPt-2397	2B	120.1	-	-	B	B	B	A	A	B	B	B	B	B	A	B	B	B	B	A	B	B	-	-	A	-	-	A	B	A	A	B	A	A	B	B	-	B	B	A	A	A	A	B	A	A	A	A	A
BS00009460	2B	129.7	A	A	B	B	B	A	A	B	B	B	A	B	A	B	B	A	B	-	B	A	A	B	A	-	A	A	B	A	A	A	A	B	B	B	A	B	B	-	B	A	A	B	A	B	A	A	A
BS00010081	2B	129.7	A	A	B	B	B	A	A	B	B	B	A	B	A	-	B	A	B	-	-	A	A	B	A	-	A	A	B	A	A	A	A	B	B	B	A	B	B	-	B	A	A	B	-	B	A	A	A
BS00039185	2B	129.7	A	A	B	B	B	A	A	B	B	B	A	B	A	B	B	A	-	A	B	A	A	B	A	B	A	A	B	A	A	A	A	B	B	B	A	B	B	A	B	A	A	B	A	B	A	A	A
BS00022478	2B	132.1	A	A	B	B	B	A	A	B	B	B	A	B	A	B	B	A	B	A	B	A	A	B	A	B	A	A	B	A	A	A	A	B	B	B	A	B	B	A	B	A	A	B	A	B	A	A	B
BS00022185	2B	133.2	A	A	-	B	B	A	A	B	B	-	A	B	A	B	B	A	B	A	B	B	A	B	A	B	A	A	B	A	A	A	A	B	B	B	A	B	B	A	B	A	A	B	A	B	A	A	-
BS00009594	2B	138	-	A	B	A	B	A	A	B	B	B	A	B	A	B	B	A	B	-	B	B	A	B	B	-	A	A	B	A	A	A	A	B	B	B	A	B	-	-	B	A	A	B	A	B	A	A	B
BS00023990	2B	138	A	A	-	-	-	A	A	B	B	-	A	-	A	B	B	A	-	A	B	B	A	B	B	B	A	A	B	A	A	A	A	B	B	B	A	-	B	A	B	A	A	B	A	B	-	-	-
eACGmCTG146	2B	138	-	A	B	A	B	-	-	B	B	B	A	-	-	B	B	-	B	-	-	B	-	-	B	B	A	-	B	-	A	-	A	-	B	B	-	-	B	A	B	A	-	-	-	-	-	-	B
BS00010918	2B	138.6	A	A	B	B	B	A	A	B	B	B	A	B	A	B	B	A	B	-	B	B	A	B	A	-	A	A	B	A	A	A	A	B	B	B	A	B	B	-	B	A	A	B	A	B	A	A	A
BS00032381	2B	138.6	A	A	B	B	B	A	A	B	B	B	A	B	A	B	B	A	-	A	B	B	A	B	A	B	A	A	B	A	A	A	A	B	B	B	A	B	B	A	B	A	A	B	A	B	A	-	A
BS00065302	2B	138.6	A	A	B	B	B	A	A	B	B	B	A	B	A	B	B	A	-	A	B	B	A	B	A	B	A	A	B	A	A	A	A	B	B	B	A	B	B	A	B	A	A	B	A	B	A	A	A
BS00100117	2B	138.6	A	A	-	B	B	A	A	B	B	B	A	B	A	B	B	A	-	A	B	B	A	B	A	B	A	A	B	A	A	A	A	B	B	B	A	B	B	A	B	A	A	B	A	B	A	-	A
BS00009418	2B	139.7	-	-	B	A	B	A	A	B	B	B	A	B	A	B	B	A	B	-	B	B	A	B	B	-	A	A	B	A	A	A	A	B	B	B	A	B	B	-	B	A	A	B	A	B	A	-	A
BS00011384	2B	139.7	A	A	B	A	B	A	A	B	B	B	A	B	A	B	B	A	B	-	B	B	A	B	B	-	A	A	B	A	A	A	A	B	B	B	A	B	B	-	B	A	A	B	A	B	A	A	A
BS00084000	2B	139.7	A	A	B	A	-	-	A	B	B	B	A	B	A	B	B	A	-	A	B	B	A	B	B	B	A	A	B	A	A	A	A	B	B	B	A	B	B	A	B	A	A	B	A	-	-	-	A
BS00011078	2B	140.3	A	A	B	A	B	A	A	B	B	B	A	B	A	B	B	A	B	-	B	B	A	B	B	-	A	A	B	A	A	A	A	B	B	B	A	B	B	-	B	A	A	B	A	B	A	A	A
BS00015938	2B	140.9	-	-	-	-	-	-	A	B	B	-	-	-	-	-	-	-	-	-	B	B	-	B	B	-	-	A	B	-	-	-	A	-	B	B	A	B	-	-	-	-	-	-	-	-	-	-	B
BS00019095	2B	140.9	A	A	B	A	B	-	-	-	B	B	A	B	A	B	B	A	B	-	B	B	A	B	B	-	A	-	B	A	A	A	A	B	B	B	A	B	B	-	B	A	A	B	B	B	A	A	B
BS00088516	2B	140.9	A	A	B	A	B	A	A	B	B	B	A	B	A	B	B	A	-	A	B	B	A	B	B	B	A	A	B	A	A	A	A	B	B	B	A	B	B	A	B	A	A	B	A	B	A	A	B
BS00010591	2B	141.5	A	A	B	A	B	-	A	B	B	-	A	B	A	B	B	A	B	-	B	B	A	B	B	-	A	A	B	A	A	A	A	B	B	B	A	B	-	-	B	A	A	B	B	B	A	A	A
BS00010859	2B	141.5	A	A	B	A	B	-	-	B	B	B	A	B	A	B	B	A	B	-	B	-	A	B	B	-	A	A	-	A	A	A	A	B	B	B	A	B	B	-	B	A	A	B	B	B	A	A	A
BS00011388	2B	141.5	A	A	B	A	B	A	A	B	B	B	A	B	A	B	B	A	B	-	B	B	A	B	B	-	A	A	B	A	A	A	A	B	B	B	A	B	B	-	B	A	A	B	B	B	A	A	A
BS00056646	2B	141.5	A	A	B	A	B	A	A	B	B	B	-	-	A	B	B	A	B	A	B	B	A	B	B	B	-	A	-	A	A	A	A	B	B	B	A	B	B	A	-	A	A	B	-	B	A	A	-
BS00071171	2B	141.5	A	A	B	A	B	A	A	B	B	B	A	B	A	B	B	A	-	A	B	B	A	B	B	B	A	A	B	A	A	A	A	B	B	B	A	B	B	A	B	A	A	B	B	B	A	A	-
BS00018412	2D	0	-	B	B	B	B	-	A	-	B	-	-	-	-	A	B	B	B	-	B	A	-	B	A	-	B	B	B	B	-	A	B	A	A	B	B	A	B	-	A	A	-	A	-	-	A	A	A
bArc124A	2D	0.7	A	B	-	B	B	A	A	A	B	B	A	B	B	A	B	B	B	B	B	A	A	B	A	A	B	B	B	B	B	A	B	A	A	B	-	A	B	B	A	A	B	A	A	A	A	-	B
cfd56	2D	0.7	-	-	-	-	-	A	A	A	B	B	A	B	B	A	B	B	B	B	B	A	A	B	A	A	B	B	B	B	B	A	B	A	A	B	-	A	B	B	A	A	-	-	-	-	-	-	-
BS00049582	2D	4.6	A	B	B	B	B	A	A	A	B	B	A	B	B	A	B	B	-	B	B	A	A	B	-	A	B	B	B	B	B	A	B	A	A	B	B	A	B	B	A	A	B	A	A	A	A	A	B
BS00072058	2D	4.6	A	B	B	B	B	A	A	A	B	B	A	B	B	A	B	B	-	B	B	A	A	B	A	A	B	B	B	B	B	A	B	A	A	B	B	A	B	B	A	A	B	A	A	A	A	A	B
BS00128354	2D	4.6	A	B	B	B	B	A	A	A	B	B	A	B	B	A	B	B	-	B	B	A	A	B	A	A	B	B	B	B	B	A	B	A	A	B	B	A	B	B	A	A	B	A	A	A	A	A	B
BS00130111	2D	4.6	A	B	B	B	B	A	A	A	B	B	A	B	B	A	B	B	-	B	B	A	A	B	-	A	B	B	B	B	B	A	B	A	A	B	B	A	B	B	A	A	B	A	A	A	A	A	B
BS00009771	2D	5.1	A	B	B	B	B	A	A	A	B	B	A	B	B	A	B	B	B	-	B	A	A	B	A	-	B	B	B	B	B	A	B	A	A	B	B	A	B	-	A	A	B	A	A	A	A	A	-
BS00024087	2D	5.1	A	B	B	B	B	A	A	A	B	B	A	B	B	A	B	B	-	B	B	A	A	B	-	A	B	B	B	B	B	A	B	A	A	B	B	A	B	B	A	A	B	A	A	A	A	A	B
BS00108016	2D	5.1	A	B	B	B	B	A	A	A	B	B	A	B	B	A	B	B	-	B	B	A	A	B	-	A	-	B	B	B	B	A	B	A	A	B	B	A	B	B	A	A	-	A	A	A	A	A	-
BS00108448	2D	5.1	A	B	B	B	B	A	A	A	B	B	A	B	B	A	B	B	-	B	B	A	A	B	-	A	B	B	B	B	B	A	B	A	A	B	B	A	B	B	A	A	B	A	A	A	A	A	B
BS00120322	2D	5.1	A	B	B	B	B	A	A	A	B	B	A	B	B	A	B	B	-	B	B	A	A	B	A	A	B	B	B	B	B	A	B	A	A	B	B	A	B	B	A	A	B	A	A	A	A	A	B
wPt-4479.unkn	2D	7.9	A	B	B	B	B	-	A	-	B	B	-	B	B	-	B	B	B	B	B	A	A	B	A	A	B	-	B	-	B	A	-	A	-	B	-	A	B	B	A	A	-	A	A	A	A	A	A
cos2Q	2D	11.9	A	B	B	B	-	A	A	-	B	B	A	B	B	-	B	B	-	B	B	A	A	B	B	-	B	A	B	B	B	-	B	A	A	B	-	A	B	B	-	A	B	A	A	A	A	A	A
cfd36	2D	13.1	A	B	B	B	B	A	A	A	B	B	A	B	B	A	B	B	B	B	B	A	A	B	B	A	B	A	B	B	B	A	B	A	A	B	-	-	B	B	A	A	B	A	A	A	A	A	A
cos2P	2D	13.1	A	B	B	B	-	A	A	-	B	B	A	B	B	-	B	B	-	B	B	A	A	B	B	-	B	A	B	B	B	-	B	A	A	B	-	A	B	B	-	A	B	A	A	A	A	A	A
BS00003791	2D	14.3	A	B	B	B	B	A	A	A	B	B	A	B	B	A	B	B	B	-	B	A	A	B	B	-	B	A	B	B	B	A	B	A	A	B	B	A	B	-	A	A	B	A	A	A	A	A	B
BS00009976	2D	14.3	A	B	B	B	B	A	A	A	B	B	A	B	B	A	B	B	B	-	B	A	A	B	B	-	B	A	B	B	B	A	B	A	A	B	B	A	B	-	A	A	B	A	A	A	A	A	B
BS00010492	2D	14.3	A	B	B	B	B	A	A	A	B	B	A	B	B	A	B	B	B	-	B	A	A	B	B	-	B	A	B	B	B	A	B	A	A	B	B	A	B	-	A	A	B	A	A	A	A	A	B
BS00049370	2D	14.3	A	B	-	-	B	A	A	A	B	B	A	B	B	A	B	B	-	B	B	A	A	B	-	A	B	A	B	B	B	A	B	A	A	B	B	A	-	B	A	A	-	A	A	A	A	A	B
BS00062567	2D	14.3	A	B	B	B	B	A	A	A	B	B	A	B	B	A	B	B	-	-	B	A	A	B	-	A	-	A	-	B	B	A	B	A	A	B	B	-	B	B	A	-	B	A	A	A	A	A	B
BS00118650	2D	14.3	A	B	B	B	B	A	A	A	B	B	A	B	B	A	B	B	-	B	B	A	A	B	A	A	B	A	B	B	B	A	B	A	A	B	B	A	B	B	A	A	B	A	A	A	A	A	B
BS00022224	2D	14.8	A	B	B	B	-	A	A	A	B	B	A	B	B	A	B	B	-	B	B	A	A	B	B	A	B	A	B	B	B	A	B	A	A	B	B	A	B	B	A	A	B	A	A	A	A	A	B
BS00049876	2D	14.8	A	B	B	B	B	A	A	A	B	B	A	B	B	A	B	B	-	B	B	A	A	B	A	-	B	A	-	B	B	A	B	A	A	B	B	A	B	B	A	A	B	A	A	A	A	A	B
BS00059043	2D	14.8	A	B	B	B	B	A	A	A	B	B	A	B	B	A	B	B	-	B	B	A	A	B	-	A	B	A	B	B	B	A	B	A	A	B	B	-	B	B	A	A	B	-	A	A	A	A	B
BS00063632	2D	14.8	A	B	B	B	B	-	A	A	B	B	-	B	B	A	B	B	-	B	B	A	A	B	-	A	B	A	B	B	B	A	B	A	A	B	-	A	B	B	A	A	B	A	A	A	A	A	B
BS00095512	2D	14.8	A	B	-	B	B	A	A	A	B	B	-	B	B	A	B	B	-	B	B	A	A	B	A	A	B	A	B	B	B	A	B	A	A	B	B	-	B	B	A	A	B	A	A	A	A	A	B
BS00140826	2D	14.8	A	B	B	B	B	A	A	A	B	B	A	B	B	A	B	B	-	B	B	A	A	B	-	A	B	A	B	B	B	A	B	A	A	B	B	A	B	B	A	A	B	A	A	A	A	A	B
BS00151398	2D	14.8	A	B	B	B	B	A	A	A	B	B	A	B	B	A	B	B	-	B	B	A	A	B	A	-	B	A	-	B	B	A	B	A	A	B	B	A	B	B	A	A	B	A	A	A	A	A	B
BS00165526	2D	14.8	A	B	B	B	B	A	A	A	B	B	A	B	B	A	B	B	-	B	B	A	A	B	B	A	B	A	B	B	B	A	B	A	A	B	B	B	B	B	A	A	B	A	A	A	A	A	B
BS00169791	2D	14.8	A	B	B	B	B	A	A	A	B	B	A	B	B	A	B	B	-	B	B	A	A	B	A	A	B	A	B	B	B	A	B	A	A	B	B	B	B	B	A	A	B	A	A	A	A	A	B
BS00180913	2D	14.8	A	B	B	B	B	A	A	A	B	B	A	B	B	A	B	B	-	B	B	A	A	B	-	A	B	A	B	B	B	A	B	A	A	B	B	B	B	B	A	A	B	A	A	A	A	A	B
BS00090678	2D	18.8	A	A	B	B	B	A	A	A	B	B	A	B	B	A	B	B	-	B	B	A	A	B	B	A	B	A	B	B	B	A	B	A	A	B	B	B	A	B	A	A	B	A	A	A	A	A	B
cfd44	2D	18.8	A	-	-	-	-	A	A	A	B	B	A	B	B	A	B	B	B	B	B	A	A	B	B	A	B	A	-	B	B	A	B	A	-	B	-	B	A	B	A	A	-	-	-	-	-	-	-
gwm261	2D	20.5	A	A	B	B	B	A	A	A	B	B	A	B	B	A	B	B	B	B	B	A	A	B	B	A	B	A	B	B	B	A	B	A	A	B	-	B	A	B	A	A	B	A	A	A	A	A	A
gwm503	2D	23	-	-	-	-	-	A	A	A	B	B	A	B	B	A	B	B	B	B	B	A	A	B	B	A	B	A	B	B	B	A	B	A	A	B	-	B	A	B	A	A	-	-	-	-	-	-	-
gwm132	2D	25.2	B	A	B	-	B	A	A	A	B	B	A	B	B	A	B	B	B	B	B	A	A	B	B	A	B	A	B	B	B	A	B	A	A	B	-	B	A	B	A	A	B	A	-	-	-	-	-
BS00035934	2D	30	B	A	B	B	B	A	A	A	B	B	A	B	B	B	B	A	-	B	B	B	A	A	A	A	-	A	-	-	B	A	-	A	A	B	B	-	-	B	A	-	A	A	A	A	A	A	A
BS00043986	2D	30	B	A	-	B	B	A	A	A	B	B	A	B	B	B	B	A	-	B	B	B	A	-	-	A	B	A	B	B	B	A	B	A	A	B	B	B	A	B	A	A	A	A	A	A	A	A	A
BS00097126	2D	30	B	A	B	B	B	A	A	A	B	B	A	B	B	B	B	A	-	B	B	B	A	A	-	A	B	A	B	B	B	A	B	A	A	B	B	B	A	B	A	A	A	A	A	A	A	A	A
BS00122104	2D	30	B	A	B	B	B	A	A	A	B	B	A	B	B	B	B	A	-	B	B	B	A	A	-	A	B	A	B	B	B	A	B	A	A	B	B	B	A	B	A	A	A	A	A	A	A	A	A
BS00122127	2D	30	B	A	B	B	B	A	A	A	B	B	A	B	B	B	B	A	-	B	B	B	A	A	-	A	B	-	B	B	B	A	B	A	A	B	B	B	A	B	A	A	A	A	A	A	A	A	A
BS00043985	2D	30.6	B	A	B	B	B	A	A	A	B	B	A	B	B	B	B	A	-	B	B	B	A	A	-	A	B	A	B	B	B	A	B	A	A	B	B	B	A	B	A	A	A	A	A	A	A	A	A
BS00022730	2D	31.7	B	-	-	-	-	A	A	A	B	B	A	B	B	B	B	A	-	B	B	B	-	A	B	A	B	A	B	B	B	A	B	A	A	B	B	B	A	B	A	A	A	A	A	B	A	A	A
BS00022900	2D	31.7	B	A	-	-	-	A	A	A	B	-	A	B	B	B	-	A	B	B	B	B	A	A	B	A	-	A	-	B	B	A	B	A	A	B	B	B	A	B	A	A	A	A	A	B	A	A	A
BS00009575	2D	32.4	B	A	B	B	B	A	A	A	B	B	A	B	B	B	B	A	B	-	B	B	A	A	B	-	B	A	B	B	B	A	B	A	A	B	B	B	A	-	A	A	A	A	A	A	A	A	A
BS00010031	2D	32.4	-	A	-	B	B	A	-	-	B	B	A	B	-	B	B	A	B	-	B	B	A	A	B	-	B	A	B	-	B	-	B	A	A	B	B	-	A	-	A	A	A	A	A	-	A	A	-
BS00011425	2D	35.6	B	A	B	B	B	A	-	A	B	B	A	B	B	B	B	A	B	-	B	B	A	A	-	-	B	A	B	-	B	A	A	A	A	A	A	B	A	-	A	A	A	A	A	A	A	A	-
wPt-9997	2D	35.6	B	-	B	B	B	-	A	A	B	B	A	B	B	B	B	A	B	A	B	B	A	A	B	A	B	A	B	A	B	A	A	A	A	A	-	B	A	B	A	A	A	A	A	A	A	A	A
BS00093757	2D	36.3	B	A	B	B	B	A	A	A	B	B	A	B	B	B	B	A	-	A	B	B	A	A	-	A	B	A	B	-	B	A	A	A	A	A	A	B	A	B	A	A	-	-	A	A	A	A	B
BS00093760	2D	36.3	B	A	B	B	B	-	A	A	B	B	A	B	B	B	B	A	-	A	B	B	A	A	B	A	B	A	B	A	B	A	A	A	A	A	A	B	A	B	A	A	-	A	A	A	A	A	B
BS00122385	2D	36.3	B	A	B	-	B	A	A	A	-	-	-	B	B	-	-	A	-	A	-	-	A	A	-	-	B	A	B	A	B	A	A	A	A	A	A	B	-	B	A	A	A	A	A	A	-	A	B
BS00178935	2D	36.3	B	A	B	B	B	A	A	A	B	B	A	B	B	B	B	A	-	A	B	B	A	A	-	A	B	A	B	A	B	A	A	A	A	A	A	B	A	B	A	A	A	A	A	A	A	A	B
BS00147940	2D	50.3	B	A	B	B	B	A	A	A	B	B	B	B	B	B	B	A	-	A	A	B	A	A	B	A	B	A	B	A	B	A	A	A	A	A	A	B	A	B	A	B	-	A	A	A	A	A	B
BS00022210	2D	67.1	B	A	A	B	B	A	A	A	A	-	B	B	B	B	B	A	B	-	B	B	A	A	B	A	B	A	B	B	B	A	A	A	A	A	A	B	A	B	B	A	A	B	A	B	A	A	A
BS00067820	2D	67.1	-	-	-	-	B	A	-	A	-	-	B	B	-	B	B	A	-	-	B	B	A	A	B	A	B	A	B	B	B	A	A	-	A	A	A	B	A	-	B	A	A	B	A	-	-	A	-
BS00016116	2D	67.7	B	A	A	B	-	A	A	A	A	A	B	B	B	B	B	A	B	A	B	B	A	A	B	A	B	A	B	B	B	A	A	A	A	-	A	B	A	B	B	A	A	B	A	B	A	A	A
BS00022976	2D	67.7	B	A	A	B	B	A	A	A	A	A	B	B	B	B	B	A	B	A	B	B	A	A	B	A	B	A	B	-	B	A	-	A	A	A	A	B	A	B	B	A	A	B	A	B	A	A	A
BS00009606	2D	68.2	B	-	A	B	B	A	A	A	-	-	B	B	-	B	B	A	B	-	B	B	A	-	B	-	B	-	B	-	B	A	A	A	A	A	A	B	-	-	B	A	A	B	A	A	A	A	A
BS00011740	2D	68.2	B	A	A	B	B	A	A	A	A	A	B	B	B	B	B	A	B	-	B	B	A	A	-	-	B	A	B	B	B	A	-	A	-	A	A	B	-	-	B	A	A	B	A	A	A	-	A
BS00021923	2D	68.2	B	A	A	B	B	A	A	A	A	A	B	B	B	B	B	A	B	-	B	B	A	A	-	-	B	A	B	B	B	A	A	A	A	A	A	B	A	-	B	A	A	B	A	A	A	A	A
BS00069899	2D	68.2	B	A	A	B	B	A	A	A	A	A	B	B	B	B	B	A	-	A	B	B	A	A	-	A	-	A	-	-	B	A	-	A	A	A	A	-	-	-	B	-	A	B	A	A	A	A	A
BS00080749	2D	68.2	B	A	A	B	B	A	A	A	A	A	B	-	B	B	B	A	-	A	B	B	A	A	A	A	B	A	B	B	B	A	A	A	A	A	A	B	A	B	B	A	A	B	A	A	A	A	A
BS00081578	2D	68.2	B	A	A	B	B	A	A	A	A	A	-	B	B	B	B	A	-	A	B	B	A	A	-	-	B	-	B	B	B	A	A	A	A	A	A	B	A	B	B	A	A	B	A	A	A	A	-
BS00144791	2D	68.2	B	A	A	B	B	A	A	A	A	A	B	B	B	B	B	A	-	A	B	B	A	A	B	A	B	A	B	B	B	A	A	A	A	A	A	B	A	B	B	A	A	B	A	A	A	A	A
BS00000002	2D	70	B	A	A	B	B	A	A	A	A	A	B	B	B	B	B	A	B	-	B	B	A	A	B	-	B	A	B	B	B	A	A	A	A	A	A	B	A	-	B	A	A	B	A	A	A	A	B
BS00003804	2D	70	B	A	A	B	B	A	A	A	A	A	B	B	B	B	B	A	B	-	-	B	A	A	B	-	B	A	B	B	B	A	A	-	A	A	A	B	A	-	B	A	A	B	A	A	A	A	B
BS00010131	2D	70	B	-	A	B	B	A	A	A	A	A	B	B	B	B	B	A	B	-	B	B	A	-	B	-	B	A	B	B	B	A	A	A	A	A	A	B	A	-	B	A	A	B	A	A	A	A	B
BS00022214	2D	70	B	A	A	B	B	A	A	A	A	A	B	B	B	B	B	A	-	-	B	B	A	A	B	A	B	A	B	B	B	A	A	A	A	A	A	-	A	B	B	A	A	B	A	A	A	A	B
BS00030765	2D	70	B	A	A	B	B	A	A	A	A	A	B	B	B	B	B	A	-	-	B	B	A	A	B	A	B	A	B	B	B	A	A	A	A	A	A	-	-	B	B	A	A	B	A	A	A	A	B
BS00031475	2D	70	B	A	A	B	B	A	A	A	A	A	B	B	B	B	B	A	-	A	B	B	A	A	-	A	-	A	B	B	B	A	A	A	A	A	A	B	A	B	B	A	A	B	A	A	A	A	B
BS00039210	2D	70	B	A	A	B	B	A	A	A	A	A	B	B	B	B	B	A	-	A	B	B	A	A	-	A	B	A	B	B	B	A	A	A	A	A	A	B	A	B	B	A	A	B	A	A	A	A	B
BS00039211	2D	70	B	A	A	B	B	A	A	A	A	A	B	B	B	B	B	A	-	A	B	B	A	A	-	A	-	A	B	B	B	A	A	A	A	A	A	B	A	B	B	A	A	B	A	A	A	A	B
BS00127492	2D	70	B	A	A	B	B	-	A	-	A	A	B	B	B	-	B	A	-	A	B	B	-	A	-	A	B	A	B	B	B	A	A	A	A	A	A	B	A	B	B	-	A	B	-	A	-	A	B
BS00128512	2D	70	B	A	A	B	B	A	A	A	A	A	B	B	B	B	B	A	-	A	-	-	A	A	A	A	B	A	B	B	B	A	A	A	A	A	A	B	A	B	B	A	-	-	A	A	A	A	B
BS00129584	2D	70	B	A	A	B	B	A	A	A	A	A	B	B	B	B	B	A	-	A	B	B	A	A	B	A	B	A	B	B	B	A	A	A	A	A	A	B	A	B	B	A	A	B	A	A	A	A	B
BS00140277	2D	70	B	A	A	B	B	A	A	A	A	A	B	B	B	B	B	A	-	A	B	B	A	A	B	A	B	A	B	B	B	A	A	A	A	A	A	B	A	B	B	A	A	B	A	A	A	A	B
BS00140592	2D	70	B	A	A	B	B	A	A	A	A	A	B	B	B	B	B	A	-	A	B	B	A	A	B	A	B	A	B	B	B	A	A	A	A	-	A	B	A	B	B	A	A	B	A	A	A	A	B
BS00151318	2D	70	B	A	A	B	B	A	A	A	A	A	B	B	B	B	B	A	-	A	B	B	A	A	-	A	B	A	B	B	B	A	A	A	A	A	A	B	A	B	B	A	A	B	A	A	A	A	B
BS00151597	2D	70	B	A	A	B	B	A	A	A	A	A	B	B	B	B	B	A	-	A	B	B	A	A	-	A	B	A	B	B	B	A	A	A	A	A	A	B	A	B	B	A	A	B	A	A	A	A	B
BS00154619	2D	70	B	A	A	B	B	A	A	A	A	A	B	B	B	B	B	A	-	A	B	B	A	A	A	A	B	A	B	B	B	A	A	A	A	A	A	B	A	B	B	A	A	B	A	A	A	A	B
BS00158185	2D	70	B	A	A	B	B	A	A	A	A	A	B	B	B	B	B	A	-	A	B	B	A	A	A	A	B	A	B	B	B	A	A	A	A	A	A	B	A	B	B	A	A	B	A	A	A	A	B
BS00166354	2D	70	B	A	A	B	B	A	A	A	A	A	B	B	B	B	B	A	-	A	B	B	A	A	A	A	B	A	B	B	B	A	A	A	A	A	A	B	A	B	B	A	A	B	A	A	A	A	B
BS00180249	2D	70	B	A	A	B	B	A	A	A	A	A	B	B	B	B	B	A	-	A	B	B	A	-	-	A	-	A	B	B	B	A	A	A	A	A	A	-	A	B	B	A	A	-	A	A	A	A	B
BS00009673	2D	71.1	B	A	A	B	B	A	A	A	A	A	B	B	B	B	B	A	B	-	B	B	-	A	B	-	B	A	B	B	B	A	A	-	A	A	A	B	A	-	B	A	A	B	A	A	A	A	B
BS00010184	2D	71.1	-	A	A	B	B	A	A	-	A	A	B	B	B	B	B	A	B	-	B	B	A	A	-	-	B	A	B	-	B	A	A	A	A	A	A	B	A	-	B	A	A	B	A	A	A	A	B
BS00063225	2D	71.1	B	A	A	B	B	A	A	A	A	A	B	B	B	B	B	A	-	A	B	B	A	A	B	A	B	A	B	B	B	A	A	A	A	A	A	B	A	B	B	A	A	B	A	A	A	A	B
BS00079460	2D	71.1	B	A	A	B	B	A	A	A	A	A	B	B	B	B	B	A	-	A	B	B	A	A	-	A	B	-	B	B	B	A	A	A	A	A	A	B	A	B	B	-	-	B	A	A	A	A	B
BS00082604	2D	71.1	B	A	A	B	B	A	A	A	A	A	B	B	B	B	B	A	-	A	B	B	A	A	B	A	B	A	B	B	B	A	A	A	A	A	A	B	A	B	B	A	A	B	A	A	A	A	B
BS00121729	2D	71.1	B	A	A	B	B	A	A	A	A	A	B	B	B	B	B	A	-	A	B	B	A	A	B	A	B	A	B	B	B	A	A	A	A	A	A	B	A	B	B	A	A	B	A	A	A	A	B
BS00130996	2D	71.1	B	A	A	B	B	A	A	A	A	A	B	B	B	B	B	A	-	A	B	B	A	A	B	A	B	A	B	B	B	A	A	A	A	A	A	B	A	B	B	A	A	B	A	A	A	A	B
BS00145228	2D	71.1	B	A	A	-	B	A	A	A	A	A	B	B	B	B	B	A	-	A	B	B	A	A	B	A	B	A	B	B	B	A	A	A	A	A	A	B	A	B	B	A	A	B	A	A	A	A	B
BS00161142	2D	71.1	B	A	A	B	B	A	A	A	A	A	B	B	B	B	B	A	-	A	B	B	A	A	B	A	B	A	B	B	B	A	A	A	A	A	A	B	A	B	B	A	A	B	A	A	A	A	B
BS00167372	2D	71.1	B	A	A	B	B	A	A	A	A	A	B	B	B	B	B	A	-	A	B	B	A	-	B	A	B	A	B	B	B	A	A	-	A	A	A	B	A	B	B	A	A	B	A	A	A	A	B
BS00044720	2D	71.7	B	A	A	-	B	A	A	A	A	A	B	B	B	B	B	A	-	A	B	B	A	A	B	A	B	A	B	B	B	A	A	A	A	A	A	B	A	B	B	A	-	B	A	A	A	A	A
BS00139707	2D	71.7	B	A	A	B	B	A	A	A	A	A	B	B	B	B	B	A	-	A	B	B	A	A	B	A	B	-	B	B	B	A	-	A	A	A	A	B	A	B	B	A	A	B	A	A	A	A	A
BS00021940	2D	72.3	B	A	-	-	B	A	A	A	A	A	B	B	B	B	B	A	B	A	B	B	A	A	B	A	B	A	B	B	B	A	A	A	-	A	A	B	A	B	B	A	A	B	A	B	A	A	-
BS00022019	2D	72.3	B	A	A	B	B	A	A	A	A	A	B	B	B	B	B	A	B	-	B	B	A	-	B	A	B	A	B	B	B	A	A	A	A	A	A	B	A	B	B	A	A	B	A	B	A	A	A
BS00022679	2D	72.3	B	A	A	-	B	A	A	A	A	A	-	B	B	B	B	A	B	A	B	B	A	A	B	A	B	A	B	B	B	A	A	A	A	A	A	B	A	B	B	A	A	B	A	B	A	A	-
BS00023211	2D	72.3	B	A	-	-	B	A	A	A	A	A	B	B	B	B	B	A	B	A	B	B	A	A	B	A	B	A	B	B	B	A	A	A	A	A	A	B	A	B	B	A	A	B	A	B	A	A	B
BS00009932	2D	73.4	B	-	-	B	B	A	A	A	A	A	B	B	B	B	B	A	B	-	B	B	A	A	B	-	B	A	B	B	B	A	A	A	A	A	A	B	A	-	B	A	A	B	A	A	A	A	B
BS00014647	2D	73.4	B	A	A	B	B	A	A	A	A	A	-	-	B	B	B	A	B	-	B	B	A	A	B	-	B	A	B	B	B	A	A	A	A	A	A	B	A	-	B	A	A	B	A	A	A	A	B
BS00021823	2D	73.4	B	A	A	B	B	A	A	A	A	A	-	-	B	B	B	A	B	-	B	B	A	A	B	-	B	A	B	B	B	A	A	A	A	A	A	B	A	-	B	A	A	B	A	A	A	A	A
BS00021865	2D	73.4	B	A	A	B	B	A	A	A	A	A	B	B	B	B	B	A	B	-	B	B	A	A	B	-	B	A	B	B	B	A	A	A	A	A	A	B	A	-	B	A	A	B	A	A	A	A	B
BS00062774	2D	73.4	B	A	A	B	B	A	A	A	A	A	B	B	B	B	B	A	-	A	B	B	A	A	B	A	B	A	B	B	B	A	A	A	A	A	A	B	A	B	B	A	-	B	A	A	A	A	B
BS00065946	2D	73.4	B	A	A	B	B	A	A	A	A	A	B	B	B	B	B	A	-	A	B	B	A	A	B	A	B	A	B	B	B	A	A	A	A	A	A	B	A	B	B	A	A	B	A	A	A	A	B
BS00083504	2D	73.4	B	A	A	B	B	A	A	A	A	A	B	B	B	B	-	A	-	A	B	B	A	A	B	A	B	A	B	B	B	A	A	A	A	A	A	B	A	B	B	A	A	B	A	A	A	A	A
BS00109570	2D	73.4	B	A	A	B	B	A	A	A	A	A	B	B	B	B	B	A	-	A	B	B	A	A	B	A	B	A	B	B	B	A	A	A	A	A	A	B	A	B	B	A	A	B	A	A	A	A	-
BS00134191	2D	73.4	B	A	A	B	B	A	A	A	A	A	B	B	B	B	B	A	-	A	B	B	A	A	B	A	B	A	B	B	B	A	A	A	A	A	A	B	A	B	B	A	A	B	A	A	A	A	B
BS00136983	2D	73.4	B	A	A	B	B	A	A	A	A	A	B	B	B	B	B	A	-	A	B	B	A	A	B	A	B	A	B	B	B	A	A	A	A	A	A	B	A	B	B	A	A	B	A	A	A	A	A
BS00139382	2D	73.4	B	A	A	B	B	A	A	A	A	A	B	B	B	B	B	A	-	A	B	B	A	A	B	A	B	A	B	B	B	A	A	A	A	A	A	B	A	B	B	A	A	B	A	A	A	A	B
BS00139913	2D	73.4	B	A	A	-	B	A	A	A	A	A	B	B	B	B	B	A	-	A	B	B	A	A	B	A	B	A	B	B	B	A	A	A	A	A	A	B	A	B	B	A	A	B	A	A	A	A	B
BS00150535	2D	73.4	B	A	A	B	B	A	A	A	A	A	B	B	B	B	B	A	-	A	B	B	A	A	B	A	B	A	B	B	B	A	A	A	A	A	A	B	A	B	B	A	A	B	A	A	A	A	A
BS00151272	2D	73.4	B	A	A	B	B	A	A	A	A	A	B	B	B	B	B	A	-	A	B	B	A	A	B	A	B	A	B	B	B	A	A	A	A	A	A	B	A	B	B	A	A	B	A	A	A	A	A
BS00161782	2D	73.4	B	A	A	B	B	A	A	A	A	A	B	B	B	B	B	A	-	A	B	B	A	A	B	A	B	A	B	B	B	A	A	A	A	A	A	B	A	B	B	A	A	B	A	A	A	A	B
BS00162725	2D	73.4	B	-	A	B	B	-	A	A	-	A	B	B	-	B	B	A	-	A	-	-	-	A	-	A	B	A	B	B	B	A	A	A	A	A	A	B	A	B	B	A	-	-	A	A	-	A	A
BS00021912	2D	75.2	B	A	A	B	B	A	A	A	A	A	B	B	B	B	B	A	B	-	B	B	A	A	B	-	B	A	B	B	B	A	A	A	A	A	A	B	A	-	B	A	A	B	A	A	A	A	-
BS00022917	2D	75.8	B	A	-	B	B	A	A	A	A	A	B	B	B	B	-	A	B	A	B	B	A	A	-	A	B	A	-	B	B	A	A	A	A	A	A	B	A	B	B	A	A	B	A	B	A	A	A
BS00065456	2D	78.5	B	A	B	B	B	A	A	A	A	A	B	B	B	B	B	A	-	A	B	B	A	A	B	A	B	A	B	B	B	B	A	A	A	A	A	B	A	B	B	A	A	B	A	A	A	A	B
wmc18	2D	78.5	B	A	B	B	B	A	A	A	A	A	B	B	-	B	B	A	A	A	B	B	A	A	B	A	B	A	B	B	B	B	A	A	A	A	-	B	A	-	B	A	-	-	-	-	-	-	-
BS00154377	2D	79	B	A	B	B	B	A	A	A	A	A	B	B	B	B	B	A	-	A	B	B	A	A	B	A	B	A	B	B	B	B	A	A	A	A	A	B	A	B	B	A	A	B	A	A	A	A	B
BS00070800	2D	79.6	B	A	B	B	B	A	A	A	A	A	B	B	B	B	B	A	-	A	B	B	A	A	B	A	B	A	B	B	B	B	A	A	A	A	A	B	A	B	B	A	A	B	A	A	A	A	A
wmc245b	2D	80.2	B	A	B	B	B	A	A	A	A	A	B	B	B	B	B	A	A	A	B	B	A	A	B	A	B	A	B	-	B	B	A	A	A	-	-	B	A	B	B	A	A	B	A	A	A	A	A
wPt-0298	2D	80.2	B	A	B	B	B	A	A	A	A	A	B	B	B	B	B	A	A	A	B	B	A	A	B	A	B	A	B	B	B	B	A	A	A	A	-	B	A	B	B	A	-	B	A	-	A	A	A
BS00000905	2D	80.7	B	A	B	B	B	A	A	A	A	A	B	B	B	B	B	A	A	-	-	B	A	A	B	-	B	A	B	B	B	B	A	A	A	A	A	B	A	-	B	A	A	B	A	A	A	A	A
BS00009982	2D	80.7	-	A	B	B	B	A	A	-	A	A	B	B	B	B	B	A	A	-	B	B	A	A	B	-	B	A	B	B	B	B	A	A	A	A	A	B	A	-	B	A	A	B	A	A	A	A	B
BS00010472	2D	80.7	B	A	B	B	B	A	A	-	A	A	B	B	-	B	B	A	A	-	B	B	-	A	-	-	B	A	B	-	B	B	A	A	A	A	A	B	A	-	B	A	A	B	A	A	A	A	A
BS00010792	2D	80.7	B	A	B	B	B	A	A	A	A	A	B	B	B	B	B	A	A	-	B	B	A	A	B	-	B	A	B	-	B	B	A	A	A	A	A	B	A	-	B	A	A	B	A	A	A	A	A
BS00011413	2D	80.7	B	A	B	B	B	A	A	A	A	A	B	B	B	B	B	A	A	-	B	B	A	A	B	-	B	A	-	B	B	B	A	A	A	A	A	B	A	-	B	A	A	B	A	A	A	A	A
BS00020492	2D	80.7	B	A	B	B	B	-	A	A	A	A	B	B	B	B	B	A	-	A	B	B	A	A	B	A	B	A	B	B	B	B	A	A	A	A	A	B	A	B	B	A	A	B	A	A	A	A	A
BS00021483	2D	80.7	B	A	B	B	B	A	A	A	A	A	B	B	B	B	B	A	A	-	B	B	A	A	B	-	B	A	B	B	B	B	A	A	A	A	A	B	A	-	B	A	A	B	A	A	A	A	A
BS00021927	2D	80.7	B	A	B	B	B	A	-	A	A	A	B	B	B	B	B	A	A	-	B	B	-	A	B	-	B	A	B	B	B	B	A	A	A	A	A	-	-	-	B	A	A	B	A	A	A	-	A
BS00022337	2D	80.7	B	A	B	B	B	A	A	A	A	A	B	B	B	B	B	A	A	A	B	B	A	A	B	A	B	A	B	B	B	B	A	A	A	A	A	B	A	B	B	A	A	B	A	-	A	A	A
BS00027456	2D	80.7	B	-	B	-	-	A	A	A	A	A	B	B	B	B	B	A	-	A	B	B	A	A	B	A	B	A	B	B	B	B	A	A	A	A	A	B	A	B	B	A	A	B	A	-	A	-	A
BS00122234	2D	80.7	B	A	B	B	B	A	A	A	A	A	B	B	B	B	B	A	-	A	B	B	A	A	B	A	B	A	B	B	B	B	A	A	A	A	A	-	A	B	B	A	A	B	A	A	A	A	B
BS00136574	2D	80.7	B	A	B	B	-	A	A	A	A	A	B	B	B	B	B	A	-	A	B	B	A	A	B	A	B	A	B	B	B	B	A	A	A	A	A	B	A	B	B	A	A	B	A	A	-	A	B
BS00136654	2D	80.7	B	A	B	B	B	A	A	A	A	A	B	B	B	B	B	A	-	A	B	B	A	A	B	A	B	A	B	B	B	B	A	A	A	A	A	B	A	B	B	A	-	B	A	A	A	A	B
BS00136657	2D	80.7	B	A	B	B	B	A	A	A	A	A	B	B	B	B	B	A	-	A	B	B	A	A	B	A	B	A	B	B	B	B	A	A	A	A	A	B	A	B	B	A	A	B	A	A	A	A	B
BS00140361	2D	80.7	B	A	B	B	B	A	A	A	A	A	B	B	B	B	B	A	-	A	B	B	A	A	B	A	B	A	B	B	B	B	A	A	A	A	A	-	A	B	B	A	A	B	A	A	A	A	A
BS00145819	2D	80.7	B	A	B	B	B	A	A	A	A	A	B	B	B	B	B	A	-	A	B	B	A	-	B	A	-	A	-	B	B	B	A	A	A	A	A	B	A	B	B	A	-	B	A	A	A	A	-
BS00151074	2D	80.7	B	A	B	B	B	A	A	A	A	A	B	B	B	B	B	A	-	A	B	B	A	A	B	A	B	A	B	B	B	B	A	A	A	A	A	B	A	B	B	A	A	B	A	A	A	A	B
BS00181944	2D	80.7	B	A	B	B	B	A	A	A	A	A	B	B	B	B	B	A	-	A	B	B	A	A	B	A	B	A	B	B	B	B	A	A	A	A	A	B	A	B	B	A	A	B	A	A	A	A	A
BS00011109	2D	81.4	B	A	B	-	B	A	A	A	A	A	B	B	B	B	B	A	A	-	B	B	-	A	B	-	B	A	B	-	B	B	A	A	A	A	A	B	-	-	A	A	A	B	A	A	A	-	B
BS00150920	2D	81.4	B	A	B	B	B	A	A	A	A	A	B	B	B	B	B	A	-	A	B	B	A	A	B	A	B	A	B	B	B	B	A	A	A	A	A	B	A	B	A	A	A	B	A	A	A	A	B
BS00026262	2D	82.6	B	A	B	B	B	A	A	A	A	A	B	B	B	B	B	A	-	A	B	B	A	-	B	A	B	A	B	B	B	B	A	A	A	A	A	B	A	B	A	A	A	B	A	A	A	A	B
BS00021950	2D	84.2	B	-	B	B	B	A	A	A	A	-	B	B	B	B	B	A	A	A	B	B	A	-	B	A	B	A	B	B	B	B	A	A	A	A	A	B	-	B	A	A	B	B	A	-	A	A	A
BS00040318	2D	84.2	B	A	B	B	B	A	A	A	A	A	B	B	B	B	B	A	-	A	B	B	A	A	B	A	B	A	B	B	B	B	A	A	A	A	A	B	A	B	A	A	B	B	A	A	A	A	A
bArc11A	2D	84.8	B	A	B	B	B	A	A	A	A	A	B	B	B	B	B	A	A	A	B	B	A	A	B	A	B	A	B	B	B	B	A	A	A	A	-	B	A	B	A	A	B	B	A	A	A	A	A
gwm539	2D	88.2	B	A	B	B	B	A	A	A	A	A	B	B	B	B	B	A	A	A	B	B	A	A	B	A	B	A	A	B	B	B	A	A	A	A	-	B	A	B	A	A	B	B	A	A	A	A	A
wPt-2544	2D	91.4	B	A	B	B	B	A	-	A	A	A	B	B	B	B	B	A	A	A	B	B	A	A	B	A	B	A	A	B	B	B	A	A	-	A	-	B	A	B	A	A	-	-	A	A	A	A	A
cfd161A	2D	92.1	B	A	B	B	B	A	A	A	A	A	B	B	B	B	B	A	A	A	B	B	A	A	B	A	B	A	A	B	B	B	A	A	A	A	-	B	A	-	-	A	-	-	-	-	-	-	-
wPt-3728	2D	92.1	-	A	B	B	B	A	A	A	A	A	B	B	B	B	B	A	A	A	B	B	A	A	B	-	B	A	A	B	B	B	A	A	A	A	-	B	A	B	A	A	B	B	A	A	A	A	A
BS00011313	2D	96.1	B	-	-	B	-	A	-	-	A	-	-	B	-	-	-	-	-	-	-	-	-	-	-	-	-	A	-	-	B	-	A	A	A	-	-	-	-	-	-	-	-	B	-	-	-	-	A
BS00022143	2D	96.1	B	A	A	B	B	A	A	A	A	A	B	B	B	B	B	A	-	A	B	B	A	A	-	A	B	A	B	B	B	A	A	A	A	A	A	B	A	B	B	A	A	B	A	A	A	A	A
BS00024077	2D	96.1	B	A	A	B	B	A	A	A	A	A	B	B	B	B	B	A	-	A	B	B	A	A	A	A	B	A	B	B	B	A	A	A	A	A	A	B	A	B	B	A	A	B	A	A	A	A	A
BS00062864	2D	96.1	B	A	A	B	B	A	A	A	A	A	B	B	B	B	B	A	-	A	B	B	A	A	-	A	B	A	-	B	B	A	A	A	A	A	A	B	A	B	B	A	A	B	A	A	A	A	A
BS00062865	2D	96.1	B	A	A	B	B	A	A	A	A	A	B	B	B	B	B	A	-	A	B	B	A	A	-	A	B	A	-	B	B	A	A	A	A	A	A	-	A	B	B	A	A	-	A	A	A	A	A
BS00067757	2D	96.1	B	A	A	B	B	A	A	A	A	A	B	B	B	B	B	A	-	A	B	B	A	A	B	A	B	A	B	B	B	A	A	A	A	A	A	B	A	B	B	A	A	B	A	A	A	A	A
BS00073229	2D	96.1	B	A	A	B	B	A	A	A	A	A	B	B	B	B	B	A	-	A	B	B	A	A	-	A	B	A	B	B	B	A	A	A	A	A	A	B	A	B	B	A	A	B	A	A	A	A	A
BS00095214	2D	96.1	B	A	A	B	B	A	A	A	A	A	B	B	B	B	B	-	-	A	B	B	-	A	-	A	B	A	B	B	B	A	A	A	A	A	A	B	A	B	B	A	A	B	A	A	A	A	A
BS00106937	2D	96.1	B	A	A	-	-	A	A	A	A	A	B	B	B	B	B	A	-	A	B	B	A	A	B	A	-	A	B	B	B	A	A	A	A	A	A	B	A	B	B	A	-	B	A	A	A	A	A
BS00111620	2D	96.1	B	A	A	-	B	A	A	A	A	A	B	B	B	B	B	A	-	A	B	B	A	A	A	A	B	A	B	B	B	A	A	A	A	A	A	B	A	B	B	A	A	B	A	A	A	A	A
BS00114260	2D	96.1	B	A	A	B	B	A	A	A	A	A	B	B	B	B	B	A	-	A	B	B	A	A	B	A	B	A	B	B	B	A	A	A	A	A	A	B	A	B	B	A	-	B	A	A	A	A	A
BS00114998	2D	96.1	B	A	A	B	B	A	A	A	A	A	B	B	B	B	B	A	-	A	B	B	A	A	B	A	B	A	B	B	B	A	A	A	A	A	A	B	A	-	B	A	A	B	A	A	-	A	A
BS00128767	2D	96.1	B	A	A	-	B	A	A	A	-	-	B	B	B	-	-	A	-	A	-	-	A	A	B	-	B	A	B	B	B	A	A	A	A	A	A	B	A	B	B	A	A	B	A	A	A	A	A
BS00130926	2D	96.1	B	A	A	B	B	A	A	A	A	A	B	B	B	B	B	A	-	A	B	B	A	A	B	A	B	A	B	B	B	-	A	A	A	A	A	B	A	B	B	-	A	B	A	A	A	A	A
BS00132569	2D	96.1	B	A	A	B	B	A	A	A	A	A	B	B	B	B	B	A	-	A	-	B	A	A	B	A	B	A	B	B	B	A	A	A	A	A	A	B	-	B	B	A	-	B	A	A	A	A	A
BS00139200	2D	96.1	B	A	A	B	B	A	A	A	A	A	B	B	B	B	B	A	-	A	B	B	A	A	-	A	-	A	-	B	B	A	A	A	A	A	A	B	A	B	B	A	A	B	A	A	A	A	A
BS00139793	2D	96.1	B	A	A	B	B	A	A	A	A	A	B	B	B	B	B	A	-	A	B	B	A	A	B	A	B	A	B	B	B	A	A	A	A	A	A	B	A	B	B	A	-	B	A	A	A	A	A
BS00140878	2D	96.1	B	A	A	B	B	A	A	A	A	A	B	B	B	B	B	A	-	A	B	B	A	A	A	A	B	A	B	B	B	A	A	A	A	A	A	B	A	B	B	A	A	B	A	A	A	A	A
BS00149424	2D	96.1	B	A	A	B	B	A	A	A	A	A	B	B	B	B	B	A	-	A	B	B	A	A	B	A	B	A	B	B	B	A	A	A	A	A	A	B	A	B	B	A	A	B	A	A	A	A	A
BS00150344	2D	96.1	B	A	A	B	B	A	A	A	A	A	B	B	B	B	B	A	-	A	B	-	A	A	A	A	B	A	-	B	B	A	A	A	A	A	A	B	A	B	B	A	A	B	A	A	A	A	A
BS00154171	2D	96.1	B	A	A	B	B	A	A	A	A	A	B	B	B	B	B	A	-	A	B	B	A	A	B	A	B	A	B	B	B	A	A	A	A	A	A	B	A	B	B	A	A	B	A	A	A	A	A
BS00162655	2D	96.1	B	A	-	B	B	A	A	A	A	A	B	B	B	B	B	A	-	A	B	B	A	A	B	A	B	A	B	B	B	A	A	A	A	A	A	B	A	B	B	A	A	B	A	A	A	A	A
BS00174894	2D	96.1	B	A	-	B	B	A	A	A	A	A	B	B	B	B	B	A	-	A	B	B	A	A	A	A	B	A	B	B	B	A	A	A	A	A	A	B	A	B	B	A	A	B	A	A	A	A	A
BS00184513	2D	96.1	B	A	A	B	B	A	A	A	A	A	B	B	B	B	B	A	-	A	B	B	A	A	B	A	B	A	B	B	B	A	A	A	A	A	A	B	A	B	B	A	-	B	A	A	A	A	A
BS00010681	2D	96.6	B	A	A	B	B	A	A	A	A	A	B	B	B	B	B	A	B	-	-	B	A	A	-	-	B	A	B	B	B	A	A	A	A	A	A	B	A	-	B	A	A	B	B	A	A	A	A
BS00011752	2D	96.6	B	A	A	B	B	A	A	A	A	A	B	B	B	B	B	A	B	-	B	B	A	A	-	-	B	A	B	B	B	A	A	A	A	A	A	B	A	-	B	A	A	B	B	A	A	A	A
BS00021852	2D	96.6	B	A	A	B	B	A	A	A	-	A	B	B	B	B	B	A	B	-	B	B	A	A	B	-	B	A	B	B	B	A	A	A	A	A	A	B	A	-	B	A	A	B	B	A	A	A	A
BS00121023	2D	96.6	B	A	A	B	B	A	A	A	A	A	B	B	B	B	B	A	-	A	B	B	A	A	-	A	B	A	B	B	B	A	A	A	A	A	A	B	A	B	B	A	A	B	B	A	A	A	A
BS00140904	2D	96.6	B	A	A	B	B	A	A	A	A	A	B	B	B	B	B	A	-	A	B	B	A	A	A	A	B	A	B	B	B	A	A	A	A	A	A	B	A	B	B	A	A	B	B	A	A	A	A
BS00003660	2D	97.1	B	A	A	B	B	A	A	A	A	A	B	B	B	B	B	A	B	-	B	B	A	A	-	-	B	A	B	B	B	A	A	A	A	A	A	B	A	-	B	A	A	B	A	A	A	A	A
BS00010514	2D	97.1	B	A	A	B	B	A	A	A	A	A	B	B	B	B	B	A	B	-	-	B	A	A	-	-	B	A	B	B	B	A	A	A	A	A	A	B	A	-	B	A	A	B	A	A	A	A	A
BS00014219	2D	97.1	B	A	A	B	B	A	A	A	A	A	-	B	B	B	B	A	B	-	B	B	A	A	B	-	B	A	B	B	B	A	A	A	A	A	A	B	A	-	B	A	A	B	A	A	A	A	A
BS00021888	2D	97.1	B	A	A	B	B	A	A	A	A	A	B	B	B	B	B	A	B	-	B	B	A	A	B	-	B	A	B	B	B	A	A	A	A	A	A	B	A	-	B	A	A	B	A	A	A	A	A
BS00065147	2D	97.1	B	A	A	B	B	A	A	A	A	A	B	B	B	B	B	A	-	A	B	B	A	A	A	A	B	A	B	B	B	A	A	A	A	A	A	B	A	B	B	A	A	B	A	A	A	A	A
BS00128312	2D	97.1	B	A	A	B	B	A	A	A	A	A	B	B	B	B	B	A	-	A	B	B	A	A	B	A	B	A	B	B	B	A	A	A	A	A	A	B	A	B	B	A	A	B	A	A	A	A	A
BS00129289	2D	97.1	B	A	A	B	B	A	A	A	A	A	B	B	B	B	B	A	-	A	B	B	A	A	B	A	B	A	B	B	B	A	A	A	A	A	A	B	A	B	B	A	A	B	A	A	A	A	A
gwm102RG	2D	106	B	A	A	B	B	A	A	A	A	A	B	B	B	B	A	A	B	A	B	B	A	A	A	A	B	A	B	B	A	A	B	A	A	A	-	A	A	B	A	A	-	-	-	-	-	-	A
wmc453b	2D	130.8	B	A	A	B	B	B	B	A	A	A	B	B	B	B	B	A	B	B	A	B	A	A	B	A	B	A	B	B	B	A	A	A	A	A	-	-	A	B	B	A	B	B	A	-	A	A	A
BS00136847	2D	194.3	B	A	B	A	B	A	B	A	A	B	B	B	B	B	B	A	-	A	B	A	A	A	B	B	B	B	A	B	B	A	A	B	A	A	A	-	A	B	A	A	-	B	A	A	A	B	B
BS00092728	3A	0	A	A	B	B	B	B	A	A	A	B	A	A	B	B	A	A	-	A	B	A	A	B	A	B	A	A	A	B	B	B	B	A	B	B	A	A	B	A	A	B	B	B	B	A	A	A	B
BS00003733	3A	0.6	-	A	B	B	B	B	A	A	A	B	A	A	B	B	A	A	A	-	-	A	A	B	A	-	A	A	A	B	B	B	B	A	B	B	A	A	B	-	A	B	B	B	B	A	A	A	-
BS00003774	3A	0.6	A	A	B	B	B	B	A	A	A	B	A	A	B	B	A	A	A	-	-	A	A	B	A	-	A	A	A	B	B	B	B	A	B	B	A	A	B	-	A	B	B	B	B	A	A	A	A
BS00009793	3A	0.6	A	A	B	B	B	B	A	A	A	B	A	A	B	B	A	A	A	-	B	A	A	B	A	-	A	A	A	B	B	B	B	A	B	B	A	A	B	-	A	B	B	B	B	A	A	A	B
BS00010059	3A	0.6	A	A	B	B	B	B	A	A	A	B	A	A	B	B	A	A	A	-	-	A	A	B	A	-	A	-	A	-	B	B	B	A	B	B	A	A	B	-	A	B	B	B	B	A	A	A	B
BS00011516	3A	0.6	A	A	B	B	B	B	A	A	A	B	A	A	B	B	A	A	A	-	B	A	A	B	A	-	A	A	A	B	B	B	B	A	B	B	A	A	B	-	A	B	B	B	B	A	A	A	B
BS00011840	3A	0.6	A	A	B	B	B	-	-	A	A	B	A	A	B	B	A	A	A	-	B	A	A	B	A	-	A	A	A	B	B	B	B	A	B	B	A	A	B	-	A	B	B	B	B	A	A	A	B
BS00049420	3A	0.6	-	-	-	-	B	-	-	-	-	-	-	-	-	B	A	A	-	A	B	A	A	B	A	B	A	A	A	B	B	B	B	A	B	B	A	A	B	A	A	B	B	B	B	-	-	-	-
BS00080148	3A	0.6	A	A	B	B	B	B	A	A	A	B	A	A	B	B	A	A	-	A	B	A	A	B	A	B	A	A	A	B	B	B	B	A	B	B	A	A	B	A	A	B	-	B	B	A	A	A	A
BS00084348	3A	4	A	A	B	B	A	B	A	B	A	B	B	A	B	B	A	A	-	A	B	A	A	B	B	B	A	A	A	B	B	B	B	A	B	B	A	-	B	A	A	B	B	B	-	B	A	A	-
BS00084357	3A	4	A	A	-	B	A	B	A	B	A	B	B	A	B	B	A	A	-	A	B	A	A	B	B	B	A	A	A	B	B	B	B	A	B	B	A	A	B	A	A	B	B	B	B	B	A	A	A
BS00022006	3A	11.6	B	A	B	B	-	B	A	B	A	B	B	A	B	A	A	B	A	-	B	A	A	B	B	B	-	A	-	B	B	B	B	A	B	B	A	A	B	A	A	B	B	B	B	B	A	B	B
BS00073063	3A	11.6	-	A	B	B	A	B	A	B	A	B	B	A	B	A	A	B	-	A	B	A	A	B	B	B	A	A	A	B	B	B	B	A	B	B	A	-	B	-	A	B	B	-	B	B	A	B	B
BS00071422	3A	12.2	B	A	B	B	A	B	A	B	A	B	B	A	B	A	A	B	-	A	B	A	A	B	B	B	A	A	A	B	B	B	B	A	B	B	A	A	B	A	A	B	B	B	B	B	A	B	A
BS00072574	3A	12.2	B	A	B	B	A	B	A	B	A	B	B	A	B	A	A	B	A	A	B	A	A	B	B	B	A	A	A	B	B	B	B	A	B	B	A	A	B	A	A	B	B	B	B	B	A	B	A
BS00000628	3A	22.1	B	A	B	B	B	B	A	B	A	B	B	A	A	A	A	B	A	-	-	A	A	A	B	-	A	-	A	B	B	-	B	A	B	B	A	A	B	-	A	B	B	B	B	B	A	B	A
wPt-1688	3A	39.6	B	A	A	A	B	B	B	B	A	B	B	A	A	A	A	B	A	A	A	B	A	A	B	B	A	A	A	B	B	A	A	A	B	B	-	B	B	A	A	B	B	B	B	B	A	B	A
cfd79A	3A	50.1	B	A	B	B	B	B	B	B	A	B	B	A	A	B	A	B	A	A	A	B	A	A	B	B	A	A	A	B	B	-	A	A	B	B	-	B	B	-	B	B	B	B	B	B	A	B	A
BS00003801	3A	62.3	B	A	B	A	B	A	B	B	B	B	B	A	A	A	B	B	A	-	-	B	A	A	B	-	A	-	A	B	B	-	A	A	B	B	A	B	A	-	A	B	B	B	B	A	A	B	A
BS00013997	3A	62.3	B	A	B	A	B	A	B	B	B	B	B	A	A	A	B	B	A	-	A	B	A	A	B	-	A	A	A	B	-	A	A	A	B	B	A	B	A	-	A	B	B	B	B	A	A	B	A
BS00021981	3A	62.3	B	-	-	A	B	A	B	B	B	-	-	-	A	A	B	B	A	A	A	B	A	A	B	B	-	A	-	B	B	A	A	A	B	B	A	B	-	A	A	B	B	B	B	-	A	B	-
BS00022148	3A	62.3	B	-	B	A	B	A	B	B	B	B	B	A	A	A	B	B	A	A	A	B	A	-	B	B	A	A	-	B	B	A	A	A	B	B	A	B	A	A	A	B	B	B	B	B	A	B	B
BS00022516	3A	62.3	-	-	-	-	-	A	B	B	B	-	B	A	A	A	B	B	A	A	A	B	A	A	B	B	A	A	A	B	B	A	A	A	B	B	A	B	A	A	A	-	B	B	B	B	A	B	-
BS00022624	3A	62.3	-	A	-	-	B	A	B	B	-	B	B	-	A	A	B	B	A	A	A	B	A	A	B	-	-	A	A	B	B	-	A	A	B	B	A	B	-	A	A	B	B	B	B	B	-	B	-
BS00022844	3A	62.3	B	A	-	A	B	A	B	B	B	B	B	A	A	A	B	B	A	A	A	B	A	A	B	B	A	A	A	B	B	A	A	A	B	B	A	B	A	A	A	B	B	B	B	B	A	-	-
BS00025191	3A	62.3	-	A	-	-	-	A	B	-	-	-	B	-	A	-	-	B	-	A	A	-	A	A	B	B	A	A	A	-	B	A	-	-	-	-	A	-	-	-	-	-	B	B	-	B	A	B	-
BS00140591	3A	62.3	B	A	B	A	B	A	B	B	B	B	B	A	A	A	B	B	-	A	A	B	A	A	B	B	A	A	A	B	B	A	A	A	B	B	A	B	A	A	A	B	B	B	B	A	A	B	A
wmc505b	3A	62.3	B	A	B	A	B	A	B	B	B	B	B	A	A	-	B	B	A	A	A	B	A	A	B	B	A	A	A	B	B	-	A	A	B	B	-	B	A	A	A	B	B	B	B	A	A	B	A
BS00034334	3A	62.8	B	A	B	A	B	A	B	B	B	B	B	A	A	A	B	B	-	A	A	B	A	A	B	B	A	A	A	B	B	A	-	-	-	B	A	-	-	A	A	B	B	B	B	A	A	B	A
BS00087723	3A	62.8	B	A	B	A	B	A	B	B	B	B	B	A	A	A	B	B	-	A	A	B	A	A	B	B	A	A	-	B	B	A	A	A	B	B	A	-	A	A	A	B	B	B	B	A	A	B	A
BS00078759	3A	63.4	B	A	-	A	B	A	B	B	B	B	B	A	A	A	B	B	-	A	A	B	A	A	B	B	A	A	A	B	B	A	A	A	B	B	A	B	B	A	A	B	B	B	B	A	A	B	A
BS00021699	3A	64.1	B	A	B	A	B	-	-	B	B	B	B	A	A	A	B	B	A	-	A	B	A	A	B	-	A	A	A	B	B	A	A	A	B	B	A	B	B	-	A	B	B	B	B	A	A	B	B
BS00010947	3A	64.6	B	A	B	A	B	A	B	B	B	B	B	A	A	A	B	B	A	-	A	B	A	A	B	-	A	A	A	B	B	A	A	A	B	B	A	B	-	-	A	B	B	B	B	A	A	B	B
BS00021976	3A	64.6	B	A	B	A	B	A	B	B	B	B	B	A	A	A	-	-	A	A	A	B	A	A	B	B	A	A	A	B	B	A	A	A	B	-	A	B	A	A	A	B	B	B	B	B	A	B	A
BS00022016	3A	64.6	B	A	B	A	B	A	B	B	B	B	B	A	A	A	B	B	A	A	A	B	A	A	B	-	A	A	A	B	B	A	A	A	B	B	A	B	A	A	A	B	B	B	B	B	A	B	A
BS00022029	3A	64.6	B	A	B	-	-	A	B	B	B	B	B	A	A	A	B	B	A	A	A	B	A	A	B	B	A	A	A	B	B	A	A	A	B	B	A	B	-	A	A	B	B	B	B	B	A	B	A
BS00022129	3A	64.6	B	A	-	A	B	A	B	B	B	B	B	A	A	A	B	B	A	A	A	B	A	A	B	B	A	A	A	B	B	A	A	A	B	B	A	B	A	A	A	B	B	B	B	B	A	B	-
BS00031903	3A	64.6	B	A	B	A	B	A	B	B	B	-	B	A	A	A	B	B	-	A	A	B	A	A	B	B	A	A	A	B	B	A	A	A	B	B	A	-	B	A	A	B	B	B	B	A	A	B	-
BS00090405	3A	64.6	B	A	B	A	B	A	B	B	B	B	B	A	A	A	B	B	-	A	A	B	A	A	B	B	A	A	A	B	B	A	A	A	B	B	A	A	B	A	A	B	B	B	B	A	A	B	A
bArc19	3A	65.2	B	A	B	A	B	A	B	B	B	B	B	A	A	A	B	B	A	A	A	B	A	A	B	B	A	A	A	B	B	A	A	A	B	B	-	B	A	A	A	B	B	-	B	A	A	B	A
eACTmCAC375	3A	69.4	B	A	B	-	-	-	-	-	B	-	A	-	-	A	B	-	A	-	-	B	-	-	B	B	A	-	A	-	B	-	A	-	B	B	-	-	B	A	A	B	-	-	-	-	-	-	A
BS00003837	3A	71	B	A	B	A	B	A	B	B	B	B	B	A	A	A	B	B	A	-	-	B	A	A	B	-	A	A	A	B	B	A	A	A	B	B	A	B	B	-	A	B	B	B	B	A	A	-	A
BS00010204	3A	71	-	A	B	A	B	A	B	B	B	B	B	A	A	A	B	B	A	-	A	B	A	A	B	-	A	A	A	B	B	A	A	A	B	B	A	B	B	-	A	B	B	B	B	A	A	-	A
BS00010531	3A	71	B	A	B	A	B	A	B	B	B	B	B	A	A	A	B	B	A	-	A	B	A	A	B	-	A	A	A	B	B	A	A	A	B	B	A	B	B	-	A	B	B	B	B	A	A	B	A
BS00034984	3A	71	B	A	B	A	B	A	B	B	B	B	B	A	A	A	B	B	-	A	A	B	A	A	B	B	A	A	A	B	B	A	A	A	B	B	A	B	B	A	A	B	B	B	B	A	A	B	A
BS00041121	3A	71	B	A	B	A	B	A	B	B	B	B	B	A	A	A	B	B	-	A	A	B	A	A	B	B	A	A	A	B	B	A	A	A	B	B	A	B	B	A	A	B	B	B	B	A	A	B	A
BS00045327	3A	71	B	A	B	-	-	A	B	B	B	B	-	A	A	A	B	B	-	A	A	B	A	A	B	B	A	A	A	B	B	A	A	A	B	B	A	-	B	A	A	B	B	B	B	A	A	B	A
BS00093377	3A	71	B	A	B	A	B	A	B	B	B	B	B	A	A	A	B	B	-	A	A	B	A	A	B	B	A	A	A	B	B	A	A	A	B	B	A	B	B	A	A	B	B	B	B	A	A	B	A
BS00078681	3A	72	B	A	B	A	B	A	B	B	B	B	B	A	A	A	B	B	-	A	A	B	A	A	B	B	A	A	A	B	B	A	A	A	B	B	A	B	B	A	A	B	B	B	B	A	A	B	A
BS00034263	3A	72.6	B	A	B	A	B	A	B	B	B	B	-	A	A	A	B	B	-	A	A	B	A	A	B	B	A	A	A	B	B	A	A	A	B	B	A	B	B	A	A	B	B	B	B	A	A	B	A
BS00039925	3A	73.1	B	A	B	A	B	A	B	B	B	B	B	A	A	A	B	B	-	A	A	B	A	A	B	B	A	A	A	B	B	A	A	A	B	B	A	B	B	A	A	B	B	B	B	A	A	B	A
BS00009465	3A	73.6	B	A	B	A	B	A	B	B	B	B	B	A	A	A	-	B	A	-	-	B	A	A	B	-	A	A	A	B	B	A	A	A	B	B	A	B	B	-	A	B	B	B	B	A	A	B	A
BS00010295	3A	73.6	B	A	B	A	B	A	B	B	B	B	B	A	A	A	B	B	A	-	A	B	A	A	B	-	A	A	A	B	B	A	A	A	B	B	A	B	B	-	A	B	B	B	B	A	A	B	A
BS00010854	3A	73.6	-	A	B	A	B	A	B	B	B	B	B	A	A	A	B	B	A	-	A	B	-	A	B	-	A	A	A	-	B	A	A	A	B	B	A	B	-	-	A	B	B	B	B	A	A	-	A
BS00011612	3A	73.6	-	A	B	A	B	-	-	-	B	B	B	A	A	A	B	B	A	-	A	B	A	-	B	-	A	A	A	B	B	A	A	A	B	B	A	B	B	-	A	B	B	B	B	A	A	B	A
BS00011660	3A	73.6	B	A	B	A	B	A	B	B	B	B	B	A	A	A	B	B	A	-	A	B	A	A	B	-	A	A	A	B	B	A	A	A	B	B	A	B	B	-	A	B	B	B	B	A	A	B	A
BS00023988	3A	73.6	B	A	-	A	B	A	B	B	B	-	B	A	A	A	B	B	-	A	A	B	-	A	B	-	A	A	A	B	B	A	A	A	B	B	A	B	B	A	A	B	B	B	B	A	A	B	A
BS00031289	3A	73.6	B	A	B	A	B	A	B	B	B	B	B	A	A	A	B	B	-	A	A	B	A	A	B	B	A	A	-	B	B	A	A	A	B	B	A	-	-	A	A	-	B	B	B	A	A	B	-
BS00037537	3A	73.6	B	A	B	A	B	A	B	B	B	B	B	A	A	A	B	B	-	A	A	B	A	A	B	B	A	A	A	B	B	A	A	A	B	B	A	B	B	A	A	B	B	B	-	A	A	B	A
BS00076631	3A	73.6	B	A	B	A	B	A	B	B	B	B	B	A	A	A	B	B	-	A	A	B	A	A	B	B	A	A	A	B	B	A	A	A	B	B	A	B	B	A	A	B	B	B	B	A	A	B	A
BS00022612	3A	74.2	B	A	B	A	B	A	B	B	B	B	B	A	A	A	B	B	A	A	A	B	A	A	B	B	A	A	A	B	B	A	A	A	B	B	A	B	B	A	A	B	B	B	B	-	A	B	A
BS00023026	3A	74.2	B	-	B	A	B	A	B	B	B	B	B	A	A	A	B	B	A	A	A	B	A	A	B	B	A	A	A	B	-	A	A	A	B	B	A	B	B	A	A	B	B	B	B	B	A	B	-
wPt-9215	3A	74.2	B	A	B	A	B	A	B	B	B	B	B	A	A	A	B	B	A	A	A	B	A	A	B	B	A	A	A	B	B	A	A	A	B	B	-	B	B	A	A	B	-	B	B	A	A	B	A
BS00022083	3A	74.8	B	A	B	A	B	A	B	B	B	B	B	A	A	A	B	B	A	A	A	B	A	A	B	B	A	A	-	B	B	A	A	A	B	B	A	B	B	A	A	B	B	B	B	B	A	B	A
BS00022325	3A	74.8	B	A	B	A	B	A	B	B	B	B	B	A	A	A	B	B	A	A	A	B	A	A	B	B	A	A	A	B	B	A	A	A	B	B	A	B	B	A	A	B	B	B	B	B	A	B	A
BS00022629	3A	74.8	B	A	B	A	B	A	B	B	B	B	B	A	A	A	B	B	A	A	A	B	A	A	B	B	A	A	A	B	B	A	A	A	B	B	A	B	B	A	A	B	B	B	B	B	A	B	A
BS00022675	3A	74.8	B	A	-	A	B	A	B	B	B	-	B	A	A	A	B	B	A	A	A	B	A	A	B	B	A	A	A	B	B	A	A	A	B	B	A	B	B	A	A	B	B	B	B	B	A	B	-
BS00022691	3A	74.8	B	A	B	A	B	A	B	B	B	-	B	A	A	A	B	B	A	A	A	B	A	A	B	B	A	A	A	B	B	A	A	A	B	B	A	B	B	A	A	B	B	B	B	B	A	B	B
BS00022159	3A	75.3	B	A	-	A	B	A	B	B	-	B	B	A	A	A	B	B	A	A	A	B	A	A	B	B	A	A	A	B	B	A	A	A	B	-	A	B	B	A	A	B	B	B	B	B	A	B	A
BS00022502	3A	75.3	B	A	-	-	B	A	B	B	B	B	-	A	A	A	B	B	A	A	A	B	A	A	B	B	A	A	A	B	B	A	A	A	-	B	A	B	B	A	-	B	B	B	B	B	A	-	A
BS00022631	3A	75.3	B	A	B	-	B	A	B	B	B	B	B	A	A	A	B	B	A	A	A	B	A	A	B	B	A	A	A	B	B	A	A	A	B	B	A	B	B	A	A	B	B	B	B	-	A	B	A
BS00022719	3A	75.3	B	A	-	A	-	A	B	B	B	-	-	A	A	A	B	B	-	A	A	B	-	A	B	-	A	-	A	B	B	A	A	A	B	B	A	B	B	A	A	B	B	B	B	B	A	-	A
BS00022881	3A	75.3	B	A	-	A	B	A	B	B	B	B	B	A	A	A	B	B	A	A	A	B	A	A	B	B	A	A	A	B	B	A	A	A	B	B	A	B	B	A	A	B	B	B	B	B	A	B	A
BS00022882	3A	75.3	B	-	B	A	B	A	B	B	B	B	B	A	A	A	B	B	A	A	A	B	A	A	B	B	A	A	A	B	B	A	A	A	B	B	A	B	B	A	A	B	B	B	B	B	A	B	A
BS00003964	3A	75.9	B	-	B	A	B	A	B	B	B	B	B	A	A	A	B	B	A	-	-	B	A	A	B	-	A	A	A	B	B	A	A	A	B	B	A	B	B	-	A	B	B	B	B	A	A	B	A
BS00009357	3A	75.9	B	A	B	A	B	A	B	B	B	B	B	A	A	-	B	B	A	-	A	B	A	A	B	-	-	A	A	-	B	A	A	A	-	B	A	B	B	-	A	B	B	B	B	A	A	B	A
BS00010284	3A	75.9	-	A	B	A	B	A	B	B	B	B	B	A	A	A	B	B	A	-	A	B	A	A	B	-	A	A	A	B	B	A	A	A	B	B	A	B	B	-	A	B	B	B	B	A	A	B	A
BS00011158	3A	75.9	B	A	B	A	B	A	B	B	B	B	B	A	A	A	B	B	A	-	A	B	A	A	B	-	A	A	A	B	B	A	A	A	B	B	A	B	B	-	A	B	B	B	B	A	A	B	A
BS00011170	3A	75.9	B	A	B	A	B	A	-	B	B	B	B	A	A	A	B	B	A	-	A	B	A	A	B	-	A	A	A	-	B	A	A	A	B	B	A	B	B	-	A	B	B	B	B	A	A	B	A
BS00011270	3A	75.9	B	A	B	A	B	A	B	-	B	B	B	A	A	A	B	B	A	-	A	B	A	A	B	-	A	A	A	B	B	A	A	A	B	B	A	B	B	-	A	B	B	B	B	A	A	-	A
BS00011798	3A	75.9	B	A	B	A	B	A	B	B	B	B	B	A	A	A	B	B	A	-	A	B	A	A	B	-	A	A	A	B	B	A	A	A	B	B	A	B	B	-	A	B	B	B	B	A	A	B	A
BS00011929	3A	75.9	B	A	B	A	B	A	B	B	B	B	B	A	A	A	B	B	A	-	A	B	A	A	B	-	A	A	A	B	B	A	A	A	B	B	A	B	B	-	A	B	B	B	B	A	A	B	A
BS00024050	3A	75.9	B	A	B	-	B	A	B	B	B	-	B	A	A	A	B	B	-	A	A	B	A	A	B	B	A	A	A	B	B	A	A	A	B	B	A	B	B	A	A	B	B	B	B	A	A	B	A
BS00036257	3A	75.9	B	A	B	A	B	A	B	B	B	B	B	A	A	A	B	B	-	A	A	B	A	A	B	B	A	A	A	B	B	A	A	A	B	B	A	B	B	A	A	B	B	B	B	A	A	B	A
BS00039357	3A	75.9	B	A	B	A	B	A	B	B	B	B	B	A	A	A	B	B	-	A	A	B	A	A	B	B	A	A	A	B	B	A	A	A	B	B	A	B	B	A	A	B	B	B	B	A	A	B	A
BS00040798	3A	75.9	B	A	B	A	B	A	B	B	B	B	B	A	A	A	B	B	-	A	A	B	A	A	B	B	A	A	A	B	B	A	A	A	B	B	A	B	B	A	A	B	B	B	B	A	A	B	-
BS00063163	3A	75.9	B	A	B	A	B	A	B	B	B	B	B	A	A	A	B	B	-	A	A	B	A	A	B	B	A	A	A	B	B	A	A	A	B	B	A	B	B	A	A	B	B	B	B	A	A	B	-
BS00067190	3A	75.9	B	A	B	A	B	A	B	B	B	B	B	A	A	A	B	B	-	A	A	B	A	A	B	B	A	A	A	B	B	A	A	A	B	B	A	B	B	A	A	B	B	B	B	A	A	B	A
BS00070870	3A	75.9	B	A	B	A	B	A	B	B	B	B	B	A	A	A	B	B	-	A	A	B	A	A	B	B	A	A	-	B	B	A	-	A	B	B	A	-	-	A	A	-	B	-	B	A	-	B	A
BS00071948	3A	75.9	B	A	B	A	B	A	B	B	B	B	B	A	A	A	B	B	-	A	A	B	A	A	B	B	A	A	A	B	B	A	A	A	B	B	A	B	B	A	A	B	B	B	B	A	A	B	A
BS00078212	3A	75.9	-	A	B	-	-	A	B	B	B	B	B	A	A	A	B	B	-	A	A	B	A	A	B	B	A	A	A	B	B	A	A	A	B	B	A	B	B	A	A	B	B	B	B	A	-	B	-
BS00088220	3A	75.9	B	A	-	-	B	A	B	B	B	B	B	A	A	A	B	B	-	A	A	B	A	A	B	B	A	A	A	B	B	A	A	A	B	B	A	B	B	A	A	B	B	B	B	A	A	B	A
BS00092735	3A	75.9	B	A	B	A	B	A	B	B	B	B	B	A	A	A	B	B	-	A	A	B	A	A	B	B	A	A	A	B	B	A	A	A	B	B	A	-	B	A	A	B	B	B	B	A	A	B	A
c2OXCNFR-3A	3A	75.9	B	A	B	A	-	A	B	-	B	B	B	A	A	-	B	B	-	A	A	B	A	A	B	-	A	A	A	B	B	-	A	A	B	B	-	B	B	A	-	B	B	B	B	A	A	B	A
BS00070511	3A	77.3	B	A	B	A	B	A	B	B	B	B	B	A	A	A	B	B	-	A	A	B	A	A	B	B	A	A	A	B	B	A	A	-	B	B	A	-	-	A	A	-	B	-	B	A	A	B	A
BS00082982	3A	77.3	-	-	-	A	-	A	B	B	B	B	B	-	A	A	B	B	-	A	A	B	A	A	B	B	A	A	A	B	B	A	-	A	B	B	A	-	B	-	A	-	B	B	B	A	-	B	A
BS00094523	3A	77.3	B	A	B	-	B	A	B	B	B	B	B	A	A	A	B	B	-	A	A	B	A	A	B	B	A	A	A	B	B	A	A	A	B	B	A	-	-	-	-	-	B	-	-	A	A	B	A
BS00078669	3A	79.3	B	A	B	A	B	A	B	B	B	B	B	A	A	A	B	B	-	A	A	B	A	A	B	B	A	A	A	A	B	A	A	A	B	B	A	A	A	A	A	A	B	-	B	A	A	B	-
BS00046335	3A	81.7	B	A	B	-	B	A	B	B	B	B	B	A	A	A	B	B	-	A	A	B	A	A	B	B	-	A	-	-	B	A	-	A	B	B	A	-	-	A	A	-	B	-	B	A	A	B	A
BS00011012	3A	82.3	-	A	B	A	B	A	B	B	B	B	B	A	A	-	B	B	A	-	A	B	A	-	B	-	A	A	A	B	-	A	-	A	B	-	A	B	B	-	A	B	A	B	B	-	A	B	-
BS00067189	3A	82.3	-	A	B	A	B	A	B	B	B	B	B	A	A	A	B	B	-	A	A	B	A	A	B	B	A	A	A	B	B	A	-	-	B	B	A	-	B	A	A	-	-	-	B	A	A	B	A
s635ACAG	3A	83.1	B	A	B	A	B	A	B	B	B	B	B	A	A	A	-	B	A	A	A	B	A	B	B	B	A	A	A	B	B	A	A	A	B	A	-	B	B	A	A	B	A	B	B	A	A	B	A
BS00021909	3A	86.6	B	A	B	A	B	A	B	-	B	B	B	A	A	A	B	B	A	-	A	B	A	A	B	-	A	A	A	B	B	A	A	A	B	A	A	B	B	-	A	B	A	B	B	A	A	-	A
wmc264	3A	86.6	B	A	B	A	B	A	B	B	B	B	B	A	A	A	B	B	A	A	A	B	A	A	B	B	A	A	A	B	B	A	A	A	B	A	-	B	B	A	A	B	A	B	B	A	A	B	A
BS00010022	3A	88.3	B	A	B	A	B	A	B	B	B	B	B	A	A	A	B	B	A	-	-	B	A	A	B	-	A	-	A	A	B	-	A	A	B	A	A	B	B	-	A	B	A	B	B	A	A	B	A
BS00011456	3A	88.3	B	A	B	A	B	A	B	B	B	-	B	A	A	A	B	B	A	-	A	B	A	A	B	-	A	A	-	A	B	A	A	A	B	A	A	B	B	-	A	-	A	-	B	A	A	B	A
BS00003778	3A	88.9	B	A	B	A	B	A	B	B	B	B	B	A	A	A	B	B	A	-	-	B	A	A	B	-	A	A	A	A	B	A	A	A	B	A	A	B	B	-	A	B	A	B	B	A	B	B	A
BS00010167	3A	88.9	B	A	B	A	B	-	-	B	B	B	B	A	A	A	B	B	A	-	A	B	A	A	B	-	A	A	A	A	B	A	A	A	B	A	A	B	B	-	A	B	A	B	B	A	B	B	A
BS00038663	3A	88.9	-	A	B	-	-	A	B	B	B	B	B	A	A	A	B	B	-	A	A	B	A	A	B	B	-	A	A	A	B	A	A	A	B	A	A	B	B	A	A	B	A	B	B	A	B	B	A
BS00038664	3A	88.9	B	A	B	A	B	A	B	B	B	B	B	A	A	A	B	B	-	A	A	B	A	A	B	B	A	A	-	A	B	A	A	A	B	A	A	-	-	A	A	B	A	B	B	A	B	B	A
BS00071428	3A	88.9	B	A	B	A	B	A	B	B	B	B	B	A	A	A	B	B	-	A	A	B	A	A	B	B	A	A	A	A	B	A	A	A	B	A	A	B	B	A	A	B	A	B	B	A	B	B	A
BS00022533	3A	90	B	-	B	A	B	A	B	B	B	B	B	A	A	A	B	B	A	A	A	B	A	A	B	B	A	A	A	A	B	A	A	A	B	A	A	B	B	A	A	B	A	B	B	B	B	B	A
BS00022845	3A	90.5	B	A	-	A	B	A	B	B	B	B	B	A	A	A	B	B	A	A	A	B	A	A	B	B	A	-	A	A	B	-	A	A	B	A	A	B	B	A	A	B	A	B	B	B	A	B	A
BS00022989	3A	90.5	B	A	B	A	-	A	B	B	B	B	B	A	A	A	B	B	A	A	A	B	A	A	B	B	A	A	A	A	B	A	A	A	-	A	A	B	B	A	A	B	A	B	B	B	A	B	A
BS00000646	3A	91.1	B	B	B	A	B	A	B	B	B	B	B	A	A	A	B	B	A	-	-	B	A	A	B	-	A	A	A	A	B	A	A	A	B	A	A	B	B	-	A	B	A	B	B	A	B	B	-
BS00003768	3A	91.1	B	B	B	A	B	A	B	B	B	B	B	A	A	A	B	B	A	-	-	B	A	A	B	-	A	A	A	A	B	A	A	A	B	A	A	B	B	-	A	B	A	B	B	A	B	B	A
BS00003924	3A	91.1	B	B	B	A	B	A	B	B	B	B	B	A	A	A	B	B	A	-	-	B	A	A	B	-	A	A	A	A	B	A	A	A	B	A	A	B	B	-	A	B	A	B	B	A	B	B	A
BS00017988	3A	91.1	-	B	B	A	B	A	B	-	B	B	B	A	A	A	B	B	A	-	A	B	A	A	B	-	A	A	A	A	B	A	A	A	B	A	A	B	B	-	A	B	A	B	B	-	B	B	A
BS00019326	3A	91.1	B	B	-	A	-	A	B	B	B	B	B	A	A	-	B	B	-	-	A	B	-	A	B	-	-	A	A	A	-	A	A	-	B	A	A	B	B	-	A	B	-	-	-	-	-	B	A
BS00022692	3A	91.1	B	-	B	-	-	A	B	B	B	B	-	A	A	A	B	B	A	-	A	B	A	-	B	B	A	A	-	-	B	A	A	A	B	A	A	B	B	-	A	B	A	B	B	B	-	B	-
BS00022703	3A	91.1	B	A	B	A	B	A	B	B	B	B	B	A	A	A	B	B	A	A	A	B	A	A	B	B	A	A	-	A	B	A	A	A	B	A	A	-	B	A	A	B	A	B	B	B	B	B	A
BS00022752	3A	91.1	B	B	-	A	B	A	B	B	B	B	B	A	A	A	B	B	A	A	-	B	-	A	B	B	A	A	A	A	B	A	A	A	B	A	A	-	B	A	A	B	A	B	B	B	B	B	A
BS00023087	3A	91.1	B	B	B	A	B	A	B	B	B	-	B	A	A	A	B	B	A	A	A	B	A	A	B	-	-	A	A	A	B	-	A	A	B	A	A	B	B	A	A	B	A	B	B	-	B	B	A
BS00023511	3A	91.1	B	B	B	A	-	A	B	B	B	B	B	A	A	A	B	B	-	A	A	B	A	A	B	B	A	A	A	A	B	A	A	A	B	A	A	B	B	A	A	B	A	B	B	A	B	B	A
BS00024007	3A	91.1	B	B	B	A	B	A	B	B	B	B	B	A	A	A	B	B	-	A	A	B	A	A	B	B	A	A	A	A	B	A	A	A	B	A	A	B	B	A	A	B	A	B	B	A	B	B	A
BS00030855	3A	91.1	B	B	B	-	B	A	B	B	B	B	B	A	A	A	B	B	-	A	A	B	A	A	B	B	A	A	A	A	B	A	A	A	B	A	A	B	B	A	A	B	A	B	B	A	B	B	A
BS00041462	3A	91.1	B	B	-	A	-	A	B	B	B	B	B	A	A	A	B	B	-	A	A	B	A	A	B	B	A	A	A	A	B	A	A	A	B	A	A	B	B	A	A	B	A	B	B	A	B	B	A
BS00049636	3A	91.1	B	B	B	A	B	A	B	B	B	B	B	A	A	A	B	B	-	A	A	B	A	A	B	B	A	A	A	A	B	A	A	A	B	A	A	B	B	A	A	B	A	B	B	A	B	B	-
BS00049637	3A	91.1	B	B	B	A	B	A	B	B	B	B	B	A	A	A	B	B	-	A	A	B	A	A	B	B	A	A	A	A	B	A	A	A	B	A	A	B	B	A	A	B	A	B	B	A	B	B	A
BS00077756	3A	91.1	B	B	B	A	B	A	B	B	B	B	B	A	A	A	B	B	-	A	A	B	A	A	B	B	A	A	A	A	B	A	A	A	B	A	A	B	B	A	A	B	A	B	B	A	B	B	A
BS00081685	3A	91.1	B	B	B	A	B	A	B	B	B	B	B	A	A	A	B	B	-	A	A	B	A	A	B	B	A	A	A	A	B	A	A	A	B	A	A	B	B	A	A	B	A	B	B	A	B	B	A
BS00103871	3A	91.1	B	B	B	A	B	A	B	B	B	B	B	A	A	A	B	B	A	A	A	-	A	A	B	B	A	A	A	A	B	A	A	A	B	A	A	B	B	A	A	B	A	B	B	B	B	B	A
BS00010414	3A	91.7	B	B	B	A	B	A	B	B	B	B	B	A	A	A	B	B	A	-	A	B	A	A	B	-	A	A	A	A	B	A	A	A	B	A	A	B	B	-	A	B	A	B	B	A	B	B	A
BS00109700	3A	91.7	B	B	B	A	B	A	B	B	B	B	B	A	A	A	B	B	-	A	A	B	A	A	B	B	A	A	A	A	B	A	A	A	B	A	A	B	B	A	A	B	A	B	B	A	B	B	A
BS00009740	3A	92.2	B	B	B	A	B	A	B	B	B	B	B	A	A	A	B	B	A	-	A	B	A	A	B	-	A	A	A	A	B	A	A	A	B	A	A	B	B	-	A	B	A	B	B	A	B	B	A
BS00021980	3A	92.8	B	B	-	A	-	A	B	B	B	B	B	A	A	A	B	B	A	A	A	B	A	A	B	B	A	A	-	A	B	A	A	A	B	A	A	B	B	A	A	B	A	B	B	B	B	B	A
BS00022058	3A	94.8	B	B	-	-	B	A	B	B	B	B	B	A	A	A	B	B	A	A	A	B	A	-	B	B	A	A	A	A	B	A	A	A	B	-	A	B	B	A	-	B	-	B	B	-	B	-	A
BS00050109	3A	98.1	B	B	-	A	B	A	B	B	B	B	B	A	A	A	B	B	-	A	A	B	A	A	-	B	A	A	A	A	B	A	A	A	B	A	A	-	B	A	A	B	A	B	B	A	B	A	A
BS00011171	3A	101.4	B	B	B	A	B	A	A	B	B	B	B	A	A	A	B	B	A	-	A	B	B	A	B	-	A	A	A	A	B	A	A	A	B	A	A	B	B	-	A	B	A	B	B	A	B	A	B
BS00011231	3A	101.4	-	B	B	A	B	A	A	-	B	B	B	A	A	A	B	B	A	-	A	B	B	A	B	-	A	A	A	A	B	A	A	A	B	A	A	B	B	-	A	B	A	B	B	A	B	A	B
BS00011280	3A	101.4	B	B	B	A	B	A	A	B	B	-	B	A	A	A	B	B	A	-	A	B	-	A	B	-	A	A	A	-	B	A	A	A	B	A	A	B	-	-	A	B	A	B	B	A	B	-	B
BS00011812	3A	101.4	B	B	B	A	B	A	A	B	B	B	B	A	A	A	B	B	A	-	A	B	B	A	B	-	A	A	A	-	B	A	A	A	B	A	A	B	B	-	A	B	A	B	B	A	B	-	B
BS00011888	3A	101.4	B	B	B	A	B	A	A	B	B	B	B	A	A	A	B	B	A	-	A	B	B	A	B	-	A	A	A	A	B	A	A	A	B	A	A	B	B	-	A	B	A	B	B	A	B	A	B
BS00023337	3A	101.4	B	B	B	A	B	A	A	B	B	B	B	A	A	A	B	B	-	A	A	B	B	-	B	B	-	A	-	A	B	A	-	A	B	A	A	-	-	-	-	B	A	-	B	A	B	A	B
BS00035364	3A	101.4	B	B	B	A	B	A	A	B	B	B	B	A	A	A	B	B	-	A	A	B	B	A	B	B	A	A	A	A	B	A	A	A	B	A	A	B	B	A	A	B	A	B	B	A	B	A	B
BS00039498	3A	101.4	B	B	B	-	B	A	A	B	B	B	B	A	A	A	B	B	-	A	A	B	B	A	B	B	A	A	A	A	B	A	A	A	B	A	A	B	-	A	A	-	A	-	B	A	B	A	B
BS00088756	3A	101.4	B	B	B	A	B	A	A	B	B	B	B	A	A	A	B	B	-	A	A	B	B	A	B	B	A	A	A	A	B	A	A	A	B	A	A	B	B	A	A	B	A	B	B	A	B	A	B
BS00099603	3A	101.4	B	B	B	A	B	A	A	B	B	B	B	A	A	A	B	B	-	A	A	B	B	A	B	B	A	A	A	A	B	A	A	A	B	A	A	-	B	A	A	B	A	B	B	A	B	A	B
BS00012084	3A	102	B	B	B	A	B	A	A	-	B	B	B	A	A	A	B	B	A	-	A	B	B	A	B	-	A	A	A	A	B	A	A	A	B	A	A	B	B	-	A	B	A	B	B	A	B	A	-
BS00020459	3A	102	B	B	-	A	B	A	A	B	B	B	B	A	A	A	B	B	-	A	A	B	B	A	B	B	A	A	A	A	B	A	A	A	B	A	A	B	B	A	A	B	A	B	B	A	B	A	B
wPt-9562	3A	102	B	B	B	A	B	A	A	B	B	B	B	A	A	A	B	B	A	A	A	B	B	A	B	B	A	A	A	A	B	A	A	A	B	A	-	B	B	A	A	B	-	B	B	-	B	A	A
BS00049977	3A	103.3	B	B	-	-	-	A	A	B	B	-	B	A	A	A	B	B	-	A	A	B	B	A	B	B	A	A	A	A	B	A	A	A	-	A	A	B	B	A	A	B	A	B	B	A	-	A	A
BS00049978	3A	104.7	B	B	B	A	A	A	A	B	B	A	B	A	A	A	B	B	-	A	A	B	B	A	B	B	A	A	A	A	B	A	A	A	B	A	A	B	B	A	A	B	A	B	B	A	B	A	A
BS00024548	3A	120.2	B	A	-	A	-	A	A	-	B	B	B	-	A	-	-	A	-	A	A	B	B	B	B	B	A	A	A	A	B	A	B	A	B	-	A	-	-	-	B	-	A	B	-	A	B	A	-
gwm155	3A	125.5	B	A	B	A	B	A	A	B	B	B	B	A	A	B	B	A	A	A	A	B	B	B	B	B	A	A	A	A	B	A	B	A	B	A	-	B	B	B	B	B	A	B	B	A	A	A	A
wPt-4725	3A	131.8	B	A	B	A	B	A	A	B	B	-	B	A	A	B	B	A	A	A	A	B	B	B	B	B	A	A	A	A	B	A	B	A	-	B	-	A	B	B	B	A	A	B	B	A	A	A	-
wPt-5133	3A	150.8	B	A	B	A	B	A	A	A	B	B	A	B	B	B	B	A	B	A	A	A	B	B	B	B	A	A	A	B	B	B	B	A	B	B	-	A	B	B	B	A	A	B	B	A	A	A	A
BS00022410	3A	153.3	B	-	B	-	B	A	A	A	B	B	A	B	B	B	B	A	-	A	A	A	-	B	B	B	A	A	A	B	B	B	B	A	B	B	A	A	B	B	B	A	A	B	B	-	A	-	A
BS00077819	3A	153.9	B	A	B	A	B	A	A	A	B	B	A	B	B	B	B	A	-	A	A	A	B	-	B	B	A	A	A	B	B	B	-	A	B	B	A	A	-	B	B	A	A	-	B	A	A	A	A
BS00009649	3A	155.1	B	A	B	A	B	A	A	A	B	B	A	B	B	B	B	A	B	-	-	A	B	B	B	-	A	A	A	B	B	B	B	A	B	B	A	A	B	-	B	A	A	B	B	A	A	A	A
BS00030652	3A	155.1	B	-	B	A	B	A	A	A	B	B	A	B	B	B	B	A	-	A	A	A	B	B	B	B	A	A	-	B	B	B	B	A	B	B	A	-	B	B	B	A	A	B	B	A	A	A	A
BS00022182	3A	155.7	B	-	B	A	B	A	A	A	B	B	A	B	B	B	B	A	B	A	A	A	B	B	B	-	-	-	A	B	B	-	B	A	B	B	-	A	B	-	-	A	A	B	-	A	A	A	B
BS00013724	3A	163.3	B	-	B	A	B	B	A	-	B	A	A	B	B	B	B	A	B	-	-	A	B	B	B	-	A	A	A	B	B	B	B	A	A	B	A	A	B	-	A	A	A	A	B	A	A	-	B
BS00023966	3A	164.6	B	A	B	-	B	B	A	A	B	A	-	B	B	B	A	A	-	A	A	A	B	B	B	A	A	A	A	B	B	B	B	A	A	B	A	A	B	A	A	A	-	A	B	A	A	B	B
BS00029569	3A	164.6	B	A	-	A	B	B	A	A	B	A	A	B	-	B	A	A	-	A	A	-	B	B	B	A	A	A	A	B	B	B	B	A	A	B	A	A	B	A	A	A	A	A	B	A	A	B	B
BS00045083	3A	165.1	B	A	B	-	B	B	A	A	B	-	A	B	B	B	A	A	-	A	A	A	B	B	B	-	A	-	A	B	B	B	B	A	A	B	A	-	B	A	A	A	A	A	B	A	A	B	A
BS00022419	3A	167	B	-	B	A	B	B	A	A	B	B	A	B	B	B	A	A	B	A	A	A	B	B	B	A	A	A	A	B	B	B	B	A	A	B	A	A	B	A	A	A	A	A	B	B	-	B	-
BS00022735	3A	167	B	A	-	A	-	B	A	A	B	A	A	B	B	B	A	A	B	A	A	A	B	B	B	A	A	A	A	B	B	B	B	A	-	B	A	A	B	A	A	A	A	A	B	B	A	B	-
BS00022915	3A	167	B	A	B	A	B	B	A	A	B	-	A	B	B	B	A	A	B	A	A	A	B	B	B	A	A	A	A	B	B	B	B	A	A	B	A	A	B	A	A	A	A	A	B	B	-	B	B
BS00022092	3A	172.8	B	A	B	A	B	B	A	A	A	A	A	B	B	A	A	A	B	A	A	A	B	B	B	-	-	A	A	B	B	-	B	A	A	B	A	A	B	A	-	A	A	A	B	B	B	B	-
BS00074926	3A	176.8	B	A	B	A	B	B	A	A	A	A	A	B	B	A	A	A	-	A	A	-	B	B	B	A	A	A	B	B	B	B	B	A	A	B	A	A	B	A	A	A	-	-	B	A	B	B	B
BS00072145	3A	177.4	B	A	B	A	B	B	A	A	A	A	A	B	B	A	A	A	-	A	A	A	B	B	B	A	A	A	B	B	B	B	B	A	A	B	A	A	B	A	A	A	A	A	B	A	B	B	B
BS00003849	3A	183.2	B	A	B	A	B	B	A	A	A	A	A	B	B	A	A	A	B	-	-	A	B	B	B	-	A	-	B	B	B	B	B	A	A	B	A	A	B	-	A	A	A	A	B	A	B	B	B
BS00066060	3B	0	B	B	A	A	B	B	B	A	B	A	A	B	A	A	B	A	-	A	B	A	A	-	-	A	A	A	B	A	A	-	B	B	A	A	A	B	-	A	A	B	B	A	A	B	-	B	A
BS00005265	3B	1.3	B	B	A	A	B	B	B	A	B	A	A	B	A	A	B	B	-	A	B	A	A	A	A	A	A	A	B	A	A	A	-	B	A	A	A	B	A	A	A	B	B	A	A	B	A	B	A
BS00094271	3B	1.3	B	B	A	A	B	B	B	A	B	A	A	-	A	A	B	B	-	A	B	A	A	A	A	A	A	A	B	A	A	A	-	B	A	A	A	-	-	A	A	-	B	A	A	B	A	B	A
BS00035134	3B	1.8	B	B	A	A	B	B	B	A	B	A	A	B	A	A	B	B	-	A	B	A	A	A	A	A	A	A	B	A	A	A	A	B	A	A	A	-	-	A	A	-	B	A	A	B	-	B	B
BS00037225	3B	1.8	-	B	-	A	B	B	B	A	B	A	A	B	A	A	B	B	-	A	B	A	A	A	A	A	A	A	B	A	A	A	A	B	A	A	A	B	A	A	A	B	B	A	A	B	A	B	B
BS00009632	3B	2.4	B	B	A	A	B	B	B	A	B	A	A	B	A	A	B	A	B	-	B	A	A	A	A	-	A	A	B	-	A	A	A	B	A	A	A	B	-	-	A	B	B	A	A	B	A	B	-
BS00009651	3B	2.4	B	B	A	A	B	B	B	A	B	A	A	B	A	A	B	A	B	-	-	A	A	A	A	-	A	A	B	A	A	A	A	B	A	A	A	B	A	-	A	B	B	A	A	B	A	B	A
BS00011869	3B	2.4	B	B	A	A	B	B	B	A	B	A	A	B	A	A	B	A	B	-	B	A	A	A	A	-	A	A	B	A	A	A	A	B	A	A	A	B	A	-	A	B	B	A	A	B	A	B	A
BS00024783	3B	2.4	B	B	A	A	B	B	B	A	B	A	A	B	A	A	B	A	-	A	B	A	A	A	A	A	A	A	B	A	A	A	A	B	A	A	A	-	A	A	A	B	B	A	A	B	A	B	A
BS00033452	3B	2.4	B	B	A	A	B	B	B	A	B	A	A	B	A	A	B	A	-	A	B	A	A	A	A	A	A	A	B	A	A	A	A	B	A	A	A	B	A	A	A	B	B	A	A	B	A	B	A
BS00060073	3B	2.4	B	B	A	A	B	B	B	A	B	A	A	B	A	A	B	A	-	A	B	A	A	A	A	A	A	A	B	A	A	A	A	B	A	A	A	B	A	A	A	B	B	A	A	B	A	B	A
BS00066467	3B	2.4	B	B	A	A	B	B	B	A	B	A	A	B	A	A	B	A	-	A	B	A	A	A	A	A	-	A	-	A	A	A	A	B	A	A	A	-	A	A	A	B	B	A	A	B	A	B	A
BS00067585	3B	2.4	B	B	A	A	B	B	B	A	B	A	A	B	A	A	B	A	-	A	B	A	A	A	A	A	A	A	-	A	A	A	A	B	A	A	A	-	-	A	A	B	B	A	A	B	A	B	A
BS00088281	3B	2.4	B	B	A	A	B	B	B	A	B	A	A	B	A	A	B	A	-	A	B	A	A	A	A	A	A	A	B	A	A	A	A	B	A	A	A	B	A	A	A	B	B	A	A	B	A	B	B
BS00089103	3B	2.4	B	B	-	A	B	B	B	A	B	A	A	B	A	A	B	A	-	A	B	A	A	A	A	A	A	A	B	A	A	A	A	B	A	A	A	B	A	A	A	B	B	A	A	B	A	B	A
BS00110445	3B	2.4	B	B	A	A	B	B	B	A	B	A	A	B	A	A	B	A	-	A	B	A	A	A	A	A	A	A	B	A	A	A	A	B	A	A	A	B	A	A	A	B	B	A	A	B	A	B	A
BS00003727	3B	2.9	B	B	A	A	B	B	B	A	B	A	A	B	A	A	B	B	B	-	-	A	A	A	A	-	A	A	B	A	A	A	A	B	A	A	A	B	A	-	A	B	B	A	A	B	A	B	B
BS00003781	3B	2.9	B	B	A	A	B	B	B	A	B	A	A	B	A	A	B	-	B	-	-	A	A	A	A	-	A	-	B	A	A	-	A	B	A	A	A	B	A	-	A	B	B	A	A	B	A	B	B
BS00012452	3B	2.9	B	B	A	A	B	B	B	A	B	A	A	B	A	A	B	A	B	-	B	A	A	A	A	-	A	A	B	A	A	A	A	B	A	A	A	B	A	-	A	B	B	A	A	B	A	B	B
bArc164	3B	3.5	B	B	A	A	B	B	B	A	B	A	A	B	A	A	B	B	B	A	B	A	A	A	A	A	A	A	-	A	A	A	A	B	A	A	-	B	A	A	A	B	B	A	A	B	A	B	A
BS00009475	3B	3.5	B	B	A	A	B	B	B	A	B	A	A	B	A	A	B	B	B	-	-	A	A	A	A	-	A	A	B	A	A	A	A	B	A	A	A	B	A	-	A	B	B	A	A	B	A	B	A
BS00015099	3B	4.6	B	B	A	-	-	-	B	-	-	-	-	-	-	A	B	A	-	-	B	A	A	A	A	-	-	A	B	A	A	A	A	B	A	A	A	B	A	-	A	B	-	-	-	-	A	-	A
BS00022051	3B	4.6	B	B	A	A	B	B	B	A	B	A	A	B	A	A	B	A	B	A	B	A	A	A	A	A	A	A	B	A	-	A	A	B	A	A	A	B	A	A	A	B	B	A	A	A	A	B	A
BS00022099	3B	4.6	B	B	A	A	B	B	B	A	B	-	A	B	A	A	B	A	B	-	B	A	A	-	A	A	A	A	B	A	A	A	A	B	A	A	A	B	A	A	A	B	B	A	A	A	A	B	A
BS00022732	3B	4.6	B	B	A	-	B	B	B	A	B	A	-	-	A	A	B	A	B	A	B	-	A	A	A	-	A	A	B	A	A	A	A	B	A	A	A	B	A	A	A	B	B	A	A	A	A	B	-
BS00022792	3B	4.6	-	B	A	-	B	B	B	A	B	-	A	B	A	A	B	-	B	A	B	A	A	A	-	A	A	A	B	A	A	A	A	B	A	A	A	B	A	A	A	B	B	A	A	A	-	-	A
cfd79b	3B	46.6	A	A	A	B	A	A	B	A	A	B	A	A	A	B	B	A	B	B	B	A	A	A	B	B	B	B	A	A	B	-	A	B	A	B	-	B	B	B	A	B	B	B	A	B	A	B	B
BS00032912	3B	61.7	A	A	A	B	B	A	B	B	A	B	A	A	B	B	B	B	-	B	B	A	A	A	B	B	B	B	A	A	B	A	-	-	A	B	B	-	-	B	B	-	-	B	A	B	B	B	B
BS00067242	3B	62.3	A	A	-	B	B	A	B	B	A	B	A	A	B	B	B	B	-	B	B	A	A	A	B	B	B	B	A	A	B	A	A	B	A	B	B	B	B	B	B	B	B	B	A	B	B	B	B
BS00007446	3B	63.4	A	A	A	B	-	A	B	B	A	B	A	A	B	B	B	B	-	B	B	A	A	A	B	B	B	B	A	A	B	A	A	B	A	B	B	B	B	B	B	B	B	B	A	B	-	-	B
BS00079522	3B	63.4	A	A	A	B	B	A	B	B	A	B	A	A	B	B	B	B	-	B	B	A	A	A	B	B	B	B	A	A	B	A	A	B	A	B	B	B	B	B	B	B	B	B	A	B	B	B	B
BS00111684	3B	63.4	A	A	-	B	B	A	B	B	A	B	A	A	B	B	B	B	-	B	B	A	-	A	B	B	B	B	A	A	B	A	A	B	A	B	B	B	B	B	B	B	B	B	A	B	B	B	B
BS00004074	3B	65.1	A	B	A	B	B	A	B	B	A	B	A	A	B	B	B	B	A	-	A	A	A	A	B	-	B	B	A	A	B	A	A	B	A	B	B	B	B	-	B	B	B	B	A	-	B	B	B
BS00009393	3B	65.1	A	B	A	B	B	A	B	B	A	B	A	A	B	B	B	B	A	-	A	A	A	A	B	-	B	B	A	A	B	A	A	B	A	B	B	B	B	-	B	B	B	B	A	B	B	B	B
BS00022154	3B	65.1	A	-	A	B	B	A	B	B	A	B	A	-	B	B	B	B	A	B	A	A	A	A	B	B	B	B	A	A	B	A	A	B	A	B	B	B	B	B	B	B	B	B	A	A	B	B	B
BS00022971	3B	65.1	A	-	-	B	B	A	B	B	A	B	A	-	B	B	B	B	A	B	A	A	A	A	-	B	B	B	A	A	B	A	A	B	A	B	B	B	B	B	B	B	B	B	A	A	B	B	-
BS00033209	3B	65.1	A	B	A	-	B	A	B	B	A	B	A	A	B	B	B	B	-	B	A	A	A	A	B	B	B	B	A	A	B	A	A	B	A	B	B	-	B	B	B	B	B	B	A	B	B	B	B
BS00011438	3B	66.4	A	B	A	B	B	A	-	B	A	B	A	A	B	B	B	B	A	-	A	A	A	A	B	-	B	B	A	A	B	A	A	B	A	B	B	B	A	-	B	B	B	B	A	-	B	B	A
BS00100706	3B	67	A	B	A	B	B	A	B	B	A	B	A	A	B	B	B	B	-	B	A	A	B	A	B	B	B	B	A	A	B	A	A	B	A	B	B	B	A	B	B	B	B	B	A	A	B	B	A
BS00003596	3B	69.9	A	B	A	B	A	A	B	B	A	B	A	A	B	B	B	B	A	-	A	A	B	A	B	-	B	B	A	A	B	A	A	B	A	B	B	B	A	-	B	B	B	B	A	A	B	B	A
BS00001335	3B	70.4	A	B	A	B	A	A	B	B	A	B	A	A	B	B	B	B	A	-	-	B	B	A	B	-	B	B	A	A	B	A	A	B	A	B	B	B	A	-	B	B	B	B	A	A	B	B	A
gwm389	3B	74	A	B	A	-	A	A	B	B	A	B	A	A	B	B	B	B	A	B	-	B	B	A	B	A	B	B	A	A	B	A	A	B	A	B	-	B	A	B	B	A	B	B	A	A	B	B	A
wPt-8093	3B	77.2	A	B	A	B	A	A	B	B	A	B	A	A	B	B	-	B	A	-	-	B	B	A	B	A	-	B	A	A	B	A	A	B	A	B	-	B	A	B	B	A	-	B	A	-	B	B	B
bArc75	3B	77.9	A	B	A	B	A	A	B	B	A	B	A	A	B	B	B	B	A	B	A	A	B	A	B	A	B	B	A	A	B	A	A	B	A	B	-	B	A	B	B	B	B	B	A	A	B	B	B
BS00009440	3B	77.9	A	B	A	B	A	A	B	B	A	B	A	A	B	B	B	B	A	-	A	B	B	A	B	-	B	B	A	A	B	A	A	B	A	B	B	B	A	-	B	B	B	B	A	A	B	B	B
BS00009992	3B	77.9	A	B	A	B	A	A	B	B	A	B	A	A	B	-	B	B	A	-	-	-	B	A	B	-	B	B	A	A	B	A	A	B	A	B	B	B	A	-	B	B	B	B	A	A	B	B	B
BS00010945	3B	77.9	-	B	A	B	A	A	B	B	A	B	A	A	-	B	B	-	A	-	-	B	-	A	B	-	-	-	A	A	B	A	A	B	-	B	B	B	A	-	B	B	-	-	A	-	B	B	B
BS00012316	3B	77.9	A	B	A	B	A	A	B	B	A	B	A	A	B	B	B	B	A	-	-	B	B	A	B	-	B	B	A	A	B	A	A	B	A	B	B	B	A	-	B	B	B	B	A	A	B	B	-
BS00021849	3B	77.9	A	B	A	B	A	A	B	B	-	B	A	A	B	B	B	B	A	-	A	B	B	-	B	-	B	B	A	A	B	A	A	B	A	B	B	B	A	-	B	B	B	B	A	A	B	B	-
BS00062676	3B	77.9	A	B	A	B	A	A	B	B	A	B	A	A	B	B	B	B	-	B	A	B	B	A	B	A	B	B	-	A	B	A	-	B	A	B	B	-	A	B	B	-	B	B	A	A	B	B	B
BS00064778	3B	77.9	A	B	A	B	A	A	B	B	A	B	A	A	B	B	B	B	-	B	A	B	B	A	B	A	B	B	-	A	B	A	A	-	A	B	B	-	-	B	B	-	-	B	A	A	B	B	B
Ex04-3D	3B	77.9	A	B	A	B	-	A	B	-	A	B	A	A	B	-	B	B	-	B	A	B	B	A	B	-	B	B	A	A	B	-	A	B	A	B	-	B	A	B	-	B	B	B	A	A	B	B	B
BS00009476	3B	79.1	A	B	A	B	A	A	-	B	A	-	A	A	B	B	B	B	A	-	A	A	B	A	B	-	B	B	A	A	B	A	A	B	A	B	B	B	A	-	B	B	B	B	A	A	B	B	B
BS00012531	3B	79.1	A	B	A	B	A	A	B	B	A	B	A	A	B	B	B	B	A	-	A	A	-	A	B	-	-	-	A	A	B	A	A	B	A	B	-	B	A	-	B	B	-	B	A	A	B	B	B
BS00011532	3B	80.3	A	B	A	B	A	A	B	B	-	B	A	A	B	B	B	B	A	-	A	A	B	-	B	-	B	B	A	B	B	A	A	B	A	B	B	B	A	-	B	B	B	B	A	A	B	B	B
bArc133	3B	80.9	A	B	A	B	B	A	B	B	A	B	A	A	B	B	B	B	A	B	A	A	B	A	B	B	B	B	-	A	B	A	A	B	A	B	-	B	A	B	-	B	B	B	A	-	B	B	B
BS00003814	3B	80.9	A	B	A	B	-	A	B	B	A	B	A	A	B	B	B	B	A	-	-	A	B	A	B	-	B	B	A	A	B	A	A	B	A	B	B	B	A	-	B	B	B	B	A	A	B	B	-
BS00010844	3B	80.9	A	B	A	B	B	A	B	B	A	B	A	A	B	B	B	B	A	-	A	A	B	-	B	-	B	B	A	A	B	A	A	B	A	B	B	B	A	-	B	B	B	B	A	A	B	B	-
BS00011373	3B	80.9	A	B	A	B	-	A	-	B	A	B	A	A	B	B	B	-	A	-	A	A	-	-	B	-	B	B	A	-	B	A	A	B	A	B	B	B	-	-	B	B	B	B	A	A	B	B	B
BS00011806	3B	80.9	A	B	A	B	A	A	B	-	A	B	A	A	B	B	B	B	A	-	A	A	B	A	B	-	B	B	A	-	B	A	A	B	A	B	B	B	-	-	B	B	B	B	A	A	B	-	-
BS00012127	3B	80.9	A	B	A	B	B	A	B	B	A	B	A	A	B	B	B	B	A	-	A	A	B	A	B	-	B	B	A	A	B	A	A	B	A	B	B	B	A	-	B	B	B	B	A	A	B	-	B
wPt-1081	3B	81.5	A	-	A	B	A	A	B	B	A	B	A	A	B	B	B	A	A	B	A	A	A	A	B	B	B	B	A	A	B	A	A	B	A	B	-	B	A	B	B	B	B	B	A	A	B	B	B
BS00010849	3B	83.9	A	A	A	B	B	A	B	B	A	B	A	A	B	B	B	-	A	-	B	A	A	A	B	-	B	B	A	A	B	A	A	B	A	B	B	B	-	-	B	B	B	B	A	-	B	B	B
BS00022190	3B	85.1	A	A	-	B	B	A	B	B	A	B	A	A	B	B	B	A	A	-	B	A	A	A	B	-	B	B	A	A	B	A	A	B	A	B	B	B	B	-	B	B	B	B	A	-	B	B	B
gwm493	3B	85.1	A	A	A	B	B	A	B	B	A	B	A	A	B	B	B	A	A	B	B	A	A	A	B	B	B	B	-	A	B	A	A	B	A	B	-	B	B	B	B	B	B	B	A	B	B	B	B
BS00022622	3B	87.9	A	A	-	-	B	A	B	B	A	B	A	A	A	B	B	A	A	B	B	A	A	A	B	-	B	B	A	A	B	A	A	B	A	B	B	B	B	B	B	B	B	B	A	-	B	B	B
BS00009839	3B	89.2	-	A	A	B	B	A	B	B	A	B	A	A	A	B	B	A	A	-	B	A	A	A	B	-	B	B	A	A	B	A	A	B	A	B	B	B	B	-	B	B	B	B	A	B	B	-	-
BS00007236	3B	92.8	-	-	A	-	B	A	B	B	A	B	-	A	B	B	B	A	-	B	B	A	A	-	B	B	B	B	B	-	B	A	A	B	A	B	B	B	B	B	B	B	B	B	A	B	-	B	A
BS00004108	3B	95.3	A	A	A	B	B	A	B	B	A	B	A	A	A	B	B	A	A	-	-	A	A	A	B	-	B	B	A	A	B	A	A	B	A	B	B	B	B	-	B	B	B	B	A	B	A	B	B
BS00011966	3B	95.3	-	A	A	-	-	A	B	-	-	B	A	A	-	-	-	-	-	-	B	-	-	-	-	-	-	B	-	-	-	A	-	B	A	B	B	B	-	-	-	-	B	B	-	B	-	-	-
BS00046375	3B	98.7	A	A	A	B	B	A	B	B	A	B	A	A	A	B	B	A	-	B	B	A	A	A	B	B	B	B	A	A	B	A	A	B	A	B	B	B	B	B	B	B	B	B	A	B	A	B	A
BS00011277	3B	100.6	A	A	A	B	B	A	B	-	A	B	A	A	A	B	B	A	A	-	B	A	A	A	B	-	B	B	A	A	B	A	A	B	A	B	B	B	B	-	A	B	B	A	A	B	A	-	A
BS00011551	3B	100.6	A	A	A	B	B	A	B	B	A	B	A	A	A	B	B	A	A	-	B	A	A	A	B	-	B	B	A	A	B	A	A	B	A	B	B	B	B	-	A	B	B	A	A	B	A	-	A
BS00062752	3B	100.6	A	A	A	B	B	A	B	B	A	B	A	A	A	B	B	A	-	B	B	A	A	A	B	A	B	B	A	A	B	A	A	B	A	B	B	B	B	B	A	B	B	A	A	B	A	B	A
BS00009805	3B	101.7	A	A	A	B	B	A	B	-	-	-	-	A	-	-	B	A	A	-	B	A	-	-	B	-	B	B	A	-	B	A	A	-	A	B	B	B	-	-	A	-	B	A	-	B	A	B	-
BS00011596	3B	101.7	A	A	A	B	B	A	B	B	A	B	A	A	A	B	B	A	A	-	B	A	A	A	B	-	B	B	A	A	B	A	A	B	A	B	B	B	B	-	A	B	B	A	A	B	A	-	B
BS00089651	3B	101.7	A	A	A	-	B	A	B	B	A	B	A	A	A	B	B	A	-	B	B	A	A	A	B	A	B	B	A	A	B	A	A	B	A	B	B	B	B	B	A	B	B	A	A	B	-	B	-
BS00070456	3B	103.3	A	A	A	B	B	A	B	B	B	B	A	A	A	B	B	A	-	B	B	A	A	A	B	A	B	B	-	A	B	A	A	B	A	B	B	-	-	B	A	B	B	A	A	B	A	B	A
BS00003902	3B	110.9	A	B	A	B	B	B	B	B	B	A	A	B	A	A	B	A	B	-	-	A	A	A	B	-	B	A	B	A	B	A	A	B	A	B	B	B	B	-	A	B	B	A	A	B	A	B	-
BS00022315	3B	110.9	A	B	A	-	B	B	B	B	B	A	A	B	A	A	B	A	B	B	B	-	A	A	B	A	B	A	B	A	B	A	A	B	A	B	B	B	B	B	A	B	B	A	A	-	A	B	A
BS00070826	3B	110.9	A	B	A	B	B	B	B	B	B	A	A	B	A	A	B	A	-	B	B	A	A	A	B	A	B	A	-	A	B	A	-	-	-	B	B	-	-	B	A	-	-	-	A	B	A	B	-
wPt-8238	3B	110.9	A	B	A	B	B	B	B	B	B	A	A	B	A	A	B	A	B	B	B	A	A	A	B	A	B	A	B	A	B	A	A	B	A	B	-	B	B	B	A	B	B	A	A	B	A	B	-
BS00010332	3B	111.5	A	B	A	B	B	B	B	B	B	A	A	B	A	A	B	A	B	-	B	A	A	A	B	-	B	A	B	A	B	A	A	B	A	B	B	B	B	-	A	B	B	A	A	-	A	B	-
BS00022048	3B	116.6	B	B	A	B	B	B	B	B	B	A	A	B	A	A	B	A	B	A	B	A	A	A	B	-	-	A	-	A	B	-	A	B	A	B	A	B	B	A	B	B	B	A	A	A	A	B	A
BS00022242	3B	119.9	B	B	A	B	B	B	B	B	B	A	-	B	A	A	B	A	B	-	B	A	A	A	-	A	A	A	B	-	B	A	A	B	A	B	A	B	A	A	B	B	B	A	A	A	A	B	A
BS00003871	3B	121.1	B	B	A	B	B	B	B	B	B	A	A	B	A	A	B	A	B	-	B	A	A	A	B	-	A	A	B	A	B	A	A	B	A	B	A	B	A	-	B	B	B	A	A	B	A	B	-
BS00009513	3B	121.1	B	B	A	B	B	B	B	B	B	A	A	B	A	A	B	A	B	-	B	A	A	A	B	-	A	A	B	A	B	A	A	B	A	B	A	B	A	-	B	B	B	A	A	B	A	B	A
BS00010060	3B	123.9	B	B	A	A	B	B	B	B	B	A	A	B	A	A	B	A	B	-	B	A	A	A	A	-	A	A	B	A	B	A	A	B	A	B	A	B	A	-	B	B	B	A	A	B	A	B	-
BS00010396	3B	123.9	B	B	A	A	B	B	B	B	B	A	A	B	A	A	B	A	B	-	B	A	A	A	A	-	A	A	B	A	B	A	A	B	A	B	A	B	A	-	B	B	B	A	A	B	A	B	A
BS00011243	3B	123.9	B	B	A	A	B	B	B	B	B	A	A	B	A	A	B	A	B	-	B	A	A	A	A	-	A	A	B	A	B	A	A	B	A	B	A	B	A	-	B	B	B	A	A	B	A	B	A
BS00010818	3B	124.4	B	B	A	A	B	B	B	B	B	A	A	B	A	A	B	A	B	-	B	A	A	A	A	-	A	A	B	A	B	A	A	B	A	B	A	B	A	-	B	B	B	A	A	B	A	B	A
BS00022961	3B	124.4	B	B	A	A	B	B	B	B	B	A	A	B	A	A	B	A	B	A	B	A	A	A	A	A	A	A	B	A	B	A	A	B	A	B	A	B	A	A	B	B	B	A	A	-	A	B	A
BS00076248	3B	124.4	B	B	A	A	B	B	B	B	B	A	A	B	A	A	B	A	-	A	B	A	A	A	A	A	A	A	B	-	-	-	-	B	-	-	A	-	-	A	B	-	-	-	A	B	A	B	A
INTR-4-6	3B	125.7	B	B	A	A	-	B	B	-	B	A	A	B	A	-	-	A	-	A	B	A	A	A	A	-	A	A	B	A	B	-	A	B	A	B	-	B	A	A	-	B	B	A	A	B	A	-	A
BS00010405	3B	129	B	B	A	A	-	B	-	B	B	-	A	B	A	-	B	A	B	-	B	A	A	A	A	-	-	-	B	A	A	A	-	B	-	B	A	B	A	-	-	-	B	A	A	B	A	B	A
BS00010778	3B	129	-	B	A	A	B	B	B	B	B	A	A	B	A	A	B	A	B	-	B	A	A	A	A	-	A	A	B	A	A	A	A	B	A	B	A	B	A	-	B	B	B	A	A	B	A	B	A
BS00065426	3B	129	B	B	A	A	B	B	B	B	B	A	A	B	A	A	B	A	-	A	B	A	A	A	A	A	A	A	B	A	A	A	A	B	A	B	A	B	A	A	B	B	B	A	A	B	A	B	A
BS00019018	3B	131.3	-	B	A	-	-	B	B	-	B	A	A	-	A	-	B	A	B	-	B	A	A	A	A	-	A	A	B	A	A	-	A	B	A	A	A	-	-	-	-	B	B	A	A	B	A	B	-
BS00086717	3B	131.3	B	B	A	B	B	B	B	A	B	A	A	B	A	A	B	A	-	A	B	A	A	A	A	A	A	A	B	A	-	A	A	B	A	A	A	B	A	A	B	B	B	A	A	B	-	B	A
BS00003708	3B	131.9	B	B	A	A	B	B	B	A	B	A	A	B	A	A	B	A	B	-	-	A	A	A	A	-	A	A	B	A	A	A	A	B	A	A	A	B	A	-	B	B	B	A	A	B	A	B	A
BS00010826	3B	132.4	B	B	A	A	B	B	B	A	B	A	A	B	A	A	B	A	B	-	B	A	A	A	A	-	A	A	B	A	A	A	A	B	A	A	A	B	-	-	B	B	B	A	A	B	A	-	A
BS00011064	3B	132.4	-	B	A	A	B	B	B	-	B	A	A	B	A	A	B	A	B	-	B	A	-	A	A	-	A	A	B	A	A	A	A	B	A	A	A	B	-	-	B	B	B	A	A	B	A	B	A
BS00011570	3B	132.4	B	B	A	A	B	B	B	A	B	A	A	B	A	A	B	A	B	-	B	A	A	A	A	-	A	A	B	A	A	A	A	B	A	A	A	B	A	-	B	B	B	A	A	B	A	B	A
BS00046052	3B	132.4	B	B	A	-	B	B	B	A	B	A	-	B	A	A	B	A	-	A	B	A	A	A	A	A	A	A	B	A	A	A	A	B	A	A	A	-	A	A	B	B	B	A	A	B	-	B	A
BS00056087	3B	132.4	B	B	A	A	B	B	B	A	B	-	A	B	A	A	B	A	-	A	B	A	A	A	A	A	-	A	-	A	A	A	A	B	A	A	A	-	A	A	B	B	B	A	A	B	A	B	A
BS00060255	3B	132.4	B	B	A	A	B	B	B	A	B	A	A	B	A	A	B	A	-	A	B	A	A	A	A	A	A	A	B	A	A	A	A	B	A	A	A	B	A	A	B	B	B	A	A	B	A	B	A
BS00063036	3B	132.4	B	B	A	A	B	B	B	A	B	A	A	-	A	A	B	A	-	A	B	A	A	A	A	A	A	A	B	A	A	A	A	B	A	A	A	-	A	A	B	B	B	A	A	B	A	B	A
BS00075108	3B	132.4	B	B	A	A	B	B	B	A	B	A	A	B	A	A	B	A	-	A	B	A	A	A	A	A	A	A	B	A	A	A	A	B	A	A	A	B	A	A	B	B	B	A	A	B	A	B	A
BS00077528	3B	132.4	B	B	-	A	B	B	B	A	B	A	A	B	A	A	B	A	-	A	B	A	A	A	A	A	A	A	-	A	A	A	A	B	A	A	A	B	A	A	B	B	B	A	A	B	A	B	A
BS00010795	3B	133	-	B	A	A	B	B	B	-	B	A	A	B	A	A	B	A	B	-	B	A	A	A	A	-	A	A	B	A	A	A	A	B	A	A	A	B	-	-	B	B	B	A	A	B	A	B	A
BS00011042	3B	133	-	B	A	A	B	B	B	-	B	A	A	B	A	A	-	A	B	-	B	A	-	A	-	-	A	A	B	A	A	A	A	B	A	A	A	B	-	-	B	B	B	A	A	B	A	B	A
BS00011264	3B	133	B	B	A	A	B	B	B	A	B	A	A	B	A	A	B	A	B	-	B	A	A	A	A	-	A	A	B	A	A	A	A	B	A	A	A	B	A	-	B	B	B	A	A	B	A	B	A
BS00011720	3B	133	B	B	A	A	B	B	B	A	B	A	A	B	A	A	B	A	B	-	B	A	A	A	A	-	A	A	B	A	A	A	A	B	A	A	A	B	A	-	B	B	B	A	A	B	A	-	A
BS00015306	3B	133	-	B	A	A	B	B	B	A	B	A	A	B	A	A	B	A	B	-	B	A	A	A	A	-	A	A	B	A	A	A	-	-	A	A	A	B	A	-	B	B	B	A	A	B	A	B	-
BS00074287	3B	133	B	B	A	A	B	B	B	A	B	A	A	B	A	A	B	A	-	A	B	A	A	A	A	A	A	A	B	A	A	A	A	B	A	A	A	B	A	A	B	B	B	A	A	B	A	B	A
gwm285	3B	133	B	B	A	A	B	B	B	A	B	A	A	B	A	A	B	A	B	A	B	A	A	A	A	A	A	A	B	A	A	A	A	B	A	A	-	B	A	A	B	B	B	A	A	B	A	B	A
BS00010881	3B	133.6	B	B	A	A	B	B	B	A	B	A	-	B	A	A	B	A	B	-	B	A	A	-	-	-	A	A	B	A	-	-	A	B	A	A	A	B	A	-	B	B	B	A	A	B	A	-	-
BS00024090	3B	133.6	B	B	A	A	B	B	B	A	B	A	A	B	A	A	B	A	-	A	B	A	A	A	A	A	A	A	B	A	A	A	A	B	A	A	A	B	A	A	B	B	B	A	A	B	A	B	A
BS00023120	3B	134.7	B	B	-	-	B	B	-	A	B	A	-	B	-	A	-	A	B	A	B	-	A	A	A	-	A	A	B	A	A	A	A	B	-	A	-	B	A	A	-	B	B	A	A	A	A	B	-
BS00023121	3B	134.7	B	B	A	A	B	B	B	A	B	A	A	B	A	A	B	A	B	A	B	A	A	A	A	-	-	A	B	A	A	-	A	B	A	A	A	B	A	A	B	B	B	A	A	A	A	B	A
BS00022415	3B	135.3	-	B	-	-	B	B	B	A	B	-	A	B	A	A	B	A	-	A	B	A	-	A	A	A	A	A	B	A	A	A	A	B	A	A	A	B	A	A	B	B	B	A	A	A	A	B	A
BS00023074	3B	135.3	B	-	A	-	B	B	B	A	B	A	A	B	A	A	B	A	B	A	B	A	-	A	A	-	-	A	B	A	A	-	A	B	A	A	A	B	A	A	B	B	B	A	A	A	A	B	A
BS00022072	3B	135.9	B	B	A	A	B	B	B	-	B	A	A	B	A	A	B	A	B	A	B	A	A	A	A	A	A	A	B	A	A	A	A	B	A	A	A	B	A	A	B	B	B	A	A	A	A	B	A
BS00022741	3B	135.9	B	B	A	A	B	B	B	A	B	-	A	B	-	A	B	A	B	-	B	A	A	A	A	-	A	A	-	A	A	A	A	B	A	A	A	B	A	A	B	B	B	A	A	A	A	B	A
BS00023037	3B	135.9	B	B	A	A	B	B	B	A	B	A	A	B	A	A	B	A	B	A	B	A	A	A	A	A	A	A	B	A	A	A	A	B	-	A	A	B	A	A	B	B	B	A	A	A	A	B	A
BS00023191	3B	135.9	B	-	A	A	B	B	B	A	B	A	A	-	-	A	B	A	B	A	B	A	A	A	A	A	A	A	-	A	A	A	A	B	A	A	A	B	A	A	B	B	B	A	A	A	A	B	A
BS00023227	3B	135.9	-	B	-	A	-	B	B	A	B	A	A	B	A	A	B	A	B	A	-	-	A	A	A	A	A	A	B	A	A	A	A	B	A	A	A	B	A	A	B	B	B	A	A	-	A	-	A
BS00102622	3B	135.9	B	B	A	A	B	B	B	A	B	-	-	B	A	A	-	A	B	A	-	A	A	A	A	A	A	A	B	A	A	A	A	B	A	A	A	B	A	A	B	B	B	A	A	A	A	-	A
BS00062940	3B	137.1	-	-	A	A	B	B	B	A	-	-	A	B	A	A	B	A	B	-	B	A	A	-	A	A	A	A	B	A	A	A	A	B	A	B	A	B	A	A	B	B	B	A	A	A	A	B	A
BS00003522	3B	138.8	B	B	A	A	B	B	B	A	B	A	A	B	A	A	-	-	-	-	-	A	-	-	A	A	-	A	-	A	A	A	-	B	A	A	A	-	A	A	B	-	B	-	A	B	A	B	A
BS00003864	3B	138.8	B	B	A	A	B	B	B	A	B	A	A	B	A	A	B	A	B	-	B	A	A	A	A	-	A	A	B	A	A	A	A	B	A	-	A	B	A	-	B	B	B	A	A	B	-	B	A
BS00009289	3B	138.8	B	B	A	A	B	B	B	A	B	A	A	B	A	A	B	A	B	-	B	A	A	A	A	-	A	A	B	A	A	A	A	B	A	A	A	B	A	-	-	B	B	-	-	B	A	B	A
BS00009411	3B	138.8	B	B	A	A	B	B	-	A	B	A	A	B	A	A	B	A	B	-	B	A	A	A	A	-	A	A	B	A	A	A	A	B	A	A	A	B	-	-	B	B	B	A	A	B	A	-	A
BS00024018	3B	138.8	B	B	A	A	B	B	B	A	B	A	A	B	-	A	B	A	-	A	B	A	A	A	A	A	A	A	B	A	A	A	A	B	A	B	A	B	A	A	B	B	B	A	A	B	A	B	A
BS00034364	3B	138.8	B	B	A	A	-	B	B	A	B	-	-	B	A	A	B	A	-	A	B	A	A	A	A	A	A	A	B	A	A	A	A	B	A	A	A	-	A	A	B	B	B	A	A	B	A	B	A
BS00036352	3B	138.8	B	B	A	A	B	B	B	A	B	A	A	B	A	A	B	A	-	A	B	A	A	A	A	A	A	A	-	A	A	A	-	B	A	A	A	-	A	A	B	-	-	A	A	B	A	-	A
BS00040143	3B	138.8	B	B	A	A	B	B	B	A	B	A	A	B	A	A	B	A	-	A	B	A	A	A	A	A	A	A	B	A	A	A	A	B	A	A	A	B	A	A	B	B	B	A	A	B	A	B	A
BS00060014	3B	138.8	B	B	A	A	B	B	B	A	B	A	A	B	A	A	B	A	-	A	B	A	A	A	A	A	A	A	B	A	A	A	A	B	A	A	A	B	A	A	B	B	B	A	A	B	A	B	-
BS00079014	3B	138.8	B	B	-	A	B	B	B	A	B	A	A	B	-	A	B	A	-	A	B	A	A	A	A	A	A	A	B	A	A	A	A	B	A	B	A	B	A	A	B	B	B	A	A	B	A	B	A
BS00106922	3B	138.8	B	B	A	A	B	B	B	A	B	A	A	B	A	A	B	A	-	A	B	A	A	A	A	A	A	A	-	A	A	A	-	B	A	-	A	-	-	A	B	B	B	A	A	B	A	B	A
wmc505A	3B	138.8	B	B	A	A	-	B	B	-	B	A	A	B	A	-	B	A	-	A	B	A	A	A	A	-	A	A	B	A	A	-	A	B	A	A	-	B	A	A	-	B	B	A	A	B	A	B	A
wPt-5105	3B	138.8	-	B	A	A	B	B	B	A	B	A	A	B	A	A	B	A	B	A	-	A	A	A	A	A	A	A	B	A	A	A	A	B	A	B	-	B	A	A	B	B	B	A	A	B	A	B	A
BS00022728	3B	139.5	B	B	A	A	B	B	B	A	B	-	A	B	A	A	B	A	B	A	B	A	A	-	A	A	-	A	-	A	A	A	A	B	A	A	A	B	-	A	B	B	B	A	A	A	A	-	A
BS00022453	3B	140.1	B	B	-	A	B	B	B	A	B	A	-	-	A	A	B	A	-	-	B	A	A	A	A	A	A	A	B	A	A	A	A	B	A	A	A	B	A	A	B	B	B	A	A	A	A	B	-
BS00022708	3B	140.1	B	B	A	A	B	B	B	A	B	A	A	B	A	A	B	A	B	A	B	A	A	A	A	A	A	A	B	A	A	A	A	B	A	A	A	B	A	A	B	B	B	A	A	A	-	-	A
BS00010715	3B	140.6	B	B	A	A	B	B	B	-	B	A	A	B	A	A	B	A	B	-	B	-	A	A	A	-	A	A	B	A	A	A	A	B	A	A	A	B	A	-	B	-	B	A	A	B	A	B	A
BS00022078	3B	140.6	B	-	A	A	B	B	B	A	B	A	A	B	A	A	B	A	B	A	B	A	A	A	A	-	-	-	B	A	A	-	A	B	A	A	A	B	A	A	B	B	B	A	-	A	A	B	A
BS00049639	3B	140.6	-	B	A	A	B	B	B	A	B	A	A	B	A	A	B	-	-	A	B	A	A	A	A	A	A	A	B	A	A	A	A	B	A	A	A	B	A	A	B	B	B	A	A	-	A	B	A
wPt-9310	3B	141.2	B	B	A	A	B	B	B	A	B	A	A	B	A	A	B	A	B	A	B	A	A	A	A	A	A	A	B	A	A	A	A	B	A	A	-	B	A	A	B	B	B	A	A	B	A	B	A
BS00009337	3B	141.8	B	-	A	A	B	B	B	A	-	A	A	B	A	A	B	A	B	-	B	-	A	A	A	-	A	A	B	A	A	A	A	-	A	A	-	B	-	-	B	B	B	A	-	B	-	-	B
BS00012080	3B	141.8	B	B	A	A	B	B	B	A	B	A	A	B	A	A	B	A	B	-	B	A	A	A	A	-	A	A	B	A	A	A	A	B	A	A	A	B	A	-	B	B	B	A	A	B	A	B	B
BS00030580	3B	141.8	B	B	A	A	B	B	B	A	B	A	A	B	A	A	B	A	-	A	B	A	A	A	A	A	A	A	-	A	A	A	A	B	-	A	A	-	-	A	B	-	B	A	A	B	A	B	B
BS00040134	3B	141.8	B	B	-	A	B	B	B	A	B	A	A	B	A	A	B	A	-	A	B	A	A	A	A	A	A	A	-	A	A	A	-	B	A	A	A	-	A	A	B	B	B	A	A	B	A	B	B
BS00054511	3B	141.8	B	B	A	A	B	B	B	A	B	A	A	B	A	A	B	A	-	A	B	A	A	A	A	A	A	A	B	A	A	A	A	B	A	A	A	B	A	A	B	B	B	A	A	B	A	B	B
BS00083107	3B	141.8	B	B	A	A	B	B	B	A	B	A	A	B	A	A	B	A	-	A	B	A	A	A	A	A	A	A	B	A	A	A	A	B	A	A	A	B	A	A	B	B	B	A	A	B	A	B	B
BS00084911	3B	141.8	B	B	A	A	B	B	B	A	B	A	A	B	A	A	B	A	-	A	B	A	A	A	A	A	A	A	B	A	A	A	A	B	A	A	A	B	A	A	B	B	B	A	A	B	A	B	B
BS00099364	3B	141.8	B	B	A	A	B	B	B	A	B	A	A	B	A	A	B	A	-	A	B	A	A	A	A	A	A	A	B	A	A	A	A	B	A	A	A	-	A	A	B	-	B	-	A	B	A	B	B
BS00007593	3B	142.9	B	B	A	A	B	B	B	A	B	A	A	B	-	-	B	-	-	A	B	-	A	-	A	A	-	A	-	A	A	A	A	B	A	A	A	-	A	A	B	B	B	-	-	B	A	B	-
BS00025644	3B	142.9	B	B	A	A	B	B	B	A	B	A	A	B	A	A	B	A	-	A	B	A	A	A	A	A	A	A	B	A	A	A	A	B	A	A	A	B	A	A	B	B	B	A	A	B	A	B	A
BS00037898	3B	142.9	-	-	A	-	B	B	B	A	B	-	A	B	A	A	B	A	-	A	B	A	A	A	A	A	A	A	B	A	A	A	A	B	A	A	A	B	A	A	B	B	B	A	A	B	A	B	A
BS00049437	3B	142.9	B	B	A	A	B	B	B	A	B	A	A	B	A	A	B	A	-	A	B	A	A	A	A	A	A	A	B	A	A	A	A	B	A	A	A	B	A	A	B	B	B	A	A	B	A	B	A
BS00057451	3B	142.9	B	B	A	A	B	B	B	A	B	A	A	B	A	A	B	A	-	A	B	A	A	A	A	A	A	A	B	A	A	A	A	B	A	A	A	B	A	A	B	B	B	A	A	B	A	B	A
BS00010324	3B	143.4	B	B	A	A	B	B	B	A	B	A	A	B	A	A	B	A	B	-	B	A	A	A	A	-	A	A	B	A	A	A	A	B	A	A	A	B	A	-	B	B	B	A	A	B	A	B	B
BS00073825	3B	143.4	B	B	A	A	B	B	B	A	B	A	A	B	A	A	B	A	-	A	B	A	A	A	A	A	A	A	B	A	A	A	A	B	A	A	A	B	A	A	B	B	B	A	A	B	A	B	B
BS00022131	3B	144.1	B	B	A	A	B	B	B	A	B	-	A	B	A	A	-	A	B	A	B	A	A	A	-	A	A	A	-	A	A	A	A	B	A	A	A	-	A	A	B	B	B	A	-	A	A	B	B
BS00022140	3B	144.1	B	B	A	A	B	B	B	A	B	A	A	B	-	A	-	-	B	A	B	-	A	A	A	A	A	-	B	-	-	A	A	B	A	A	-	B	A	A	B	B	B	A	A	A	A	B	B
BS00022219	3B	144.1	B	-	A	A	B	B	B	A	B	A	A	B	A	A	B	-	B	A	B	A	A	A	A	A	A	A	B	A	A	A	A	B	A	A	A	B	A	A	B	B	B	A	A	A	A	B	-
BS00022122	3B	145.2	B	-	A	-	B	B	B	A	B	A	A	B	A	A	B	A	B	A	B	A	A	A	A	A	A	A	B	A	A	-	A	B	A	A	A	B	A	A	A	B	B	A	A	A	-	B	B
BS00000793	3B	145.8	B	B	A	A	B	B	B	A	B	A	A	B	A	A	B	A	B	-	-	A	A	A	A	-	A	A	B	A	A	A	A	B	A	A	A	B	A	-	A	-	B	A	A	B	A	B	B
BS00009579	3B	145.8	B	B	A	A	B	B	B	A	B	A	A	B	A	A	B	A	B	-	B	A	A	A	A	-	A	A	B	A	A	A	A	B	A	A	A	B	A	-	A	B	B	A	A	B	A	B	B
BS00009990	3B	145.8	-	B	A	A	B	-	B	A	B	A	A	B	A	A	B	A	B	-	B	A	A	A	A	-	A	A	B	A	A	A	A	B	A	A	A	B	A	-	A	B	B	A	A	B	A	B	B
BS00038417	3B	145.8	B	B	A	A	B	B	B	A	B	A	A	B	A	A	B	A	-	A	B	A	A	A	A	A	A	A	B	A	A	A	A	B	A	A	A	B	A	A	A	B	B	A	A	B	A	B	B
BS00062722	3B	145.8	-	B	A	A	B	B	B	A	B	A	A	B	A	A	B	A	-	A	B	A	A	A	A	A	A	A	B	A	A	A	A	B	A	A	A	B	A	A	A	B	B	A	A	B	-	B	B
BS00066058	3B	145.8	B	B	A	A	B	B	B	A	B	A	A	B	A	A	B	A	-	-	B	A	A	A	A	A	A	A	B	A	A	A	A	B	A	A	A	B	A	A	A	B	B	A	A	B	-	B	B
BS00066466	3B	145.8	-	B	A	A	-	B	B	A	B	A	A	B	A	A	B	A	-	A	B	A	A	A	A	A	A	A	B	A	A	A	A	B	A	A	A	B	A	A	A	B	B	A	A	B	A	B	B
BS00071453	3B	145.8	B	B	A	A	B	B	B	A	B	A	-	B	-	A	B	A	-	A	B	A	A	A	A	-	-	A	-	A	A	A	-	B	A	-	A	-	-	A	A	-	B	A	A	B	A	B	B
BS00089166	3B	145.8	B	B	A	A	B	B	B	A	B	A	A	B	A	A	B	A	-	A	B	A	A	A	A	A	A	-	B	A	A	A	A	B	A	A	A	B	A	A	A	B	B	A	A	B	A	B	B
BS00089954	3B	145.8	B	B	A	A	B	B	B	A	B	A	-	B	A	A	B	A	-	A	B	A	A	A	A	A	A	A	-	-	A	A	-	B	A	A	A	-	-	A	A	-	-	-	A	B	A	B	B
BS00094710	3B	145.8	B	B	A	A	B	B	B	A	B	A	A	B	A	A	B	A	-	A	B	A	A	A	A	A	A	A	B	A	A	A	A	B	A	A	A	B	A	A	A	B	B	A	A	B	A	B	B
BS00010136	3B	147	B	B	A	A	B	B	B	A	B	A	A	B	A	A	B	B	B	-	B	A	A	A	A	-	A	A	B	A	A	A	A	B	A	A	A	B	A	-	A	B	B	A	A	B	A	B	B
BS00011937	3B	147	B	B	A	A	B	B	B	A	B	-	A	B	A	A	B	B	B	-	B	A	A	A	A	-	A	A	B	A	A	A	A	B	A	A	A	B	A	-	A	-	B	-	A	B	A	B	B
BS00012388	3B	147	B	B	A	A	B	B	B	A	B	A	A	B	A	A	B	B	B	-	-	A	A	A	A	-	A	A	B	A	A	A	A	B	A	A	A	B	A	-	A	B	B	-	A	B	A	B	B
BS00011766	3B	147.5	B	B	A	A	B	B	B	A	B	A	A	B	A	A	B	B	B	-	B	A	-	A	A	-	A	A	B	-	A	A	A	B	A	A	A	B	-	-	A	B	B	A	A	-	A	-	B
BS00013262	3B	148.2	B	B	A	A	B	B	-	A	B	-	A	B	A	A	B	B	B	-	B	-	A	-	A	-	A	A	-	A	A	A	A	B	A	A	A	-	-	-	A	-	B	-	A	-	-	-	-
BS00022440	3B	148.2	-	B	-	-	B	B	B	A	B	-	A	B	A	A	B	B	B	A	B	A	A	A	A	A	-	-	B	A	A	A	A	B	A	A	A	B	A	-	A	B	B	A	A	-	A	B	A
BS00078214	3B	148.2	B	B	A	A	B	-	B	A	B	A	A	B	A	A	B	B	-	A	B	A	A	A	A	A	A	A	-	A	A	A	A	B	A	A	A	-	-	A	A	-	B	A	A	B	A	B	A
BS00001242	3B	148.8	B	B	A	A	B	B	B	A	B	A	A	B	A	A	B	B	B	-	-	A	A	A	A	-	A	-	B	A	A	-	A	B	A	A	A	B	A	-	A	B	B	A	A	B	A	-	A
BS00009701	3B	148.8	B	B	A	A	B	B	B	A	B	A	A	B	A	A	B	B	B	-	B	A	A	A	A	-	A	A	B	A	A	A	A	-	A	A	A	B	A	-	A	B	B	A	A	-	-	B	A
BS00009892	3B	148.8	B	B	A	A	B	B	B	A	B	A	A	B	A	A	B	B	B	-	-	A	A	A	A	-	A	A	B	A	A	A	A	B	A	A	A	B	A	-	A	B	B	A	A	B	A	B	A
BS00022611	3B	148.8	B	B	A	A	B	B	B	A	B	-	A	B	A	A	B	B	-	A	B	A	A	-	A	A	A	A	B	A	A	A	A	B	A	-	A	B	A	A	A	B	-	A	A	A	A	B	A
BS00063482	3B	148.8	B	B	A	A	B	B	B	A	B	A	-	B	A	A	B	B	-	A	B	A	A	A	A	A	A	A	-	A	A	A	-	B	A	A	A	-	-	A	A	-	B	A	A	B	A	B	A
BS00094456	3B	148.8	B	B	A	A	B	B	B	A	B	A	A	B	A	A	B	B	-	A	B	A	A	A	A	A	A	A	B	A	A	A	A	B	A	A	A	-	A	A	A	B	B	A	A	B	A	B	A
BS00022316	3B	149.4	B	B	A	A	B	B	B	A	B	A	A	B	A	A	B	B	B	A	B	A	A	A	A	A	A	A	B	A	A	A	A	B	A	-	A	B	A	A	A	B	B	A	A	A	A	B	A
BS00000978	3B	149.9	B	B	A	A	B	B	B	A	B	A	A	B	A	A	B	B	B	-	-	A	A	A	A	-	A	A	B	A	A	A	A	B	A	A	A	B	A	-	A	B	B	A	A	B	A	A	A
BS00009549	3B	149.9	B	B	A	A	B	B	B	-	B	A	A	B	A	A	B	B	B	-	B	A	A	A	A	-	A	A	B	A	-	A	A	B	A	A	A	B	A	-	A	B	B	A	A	B	A	A	A
BS00010083	3B	149.9	-	-	-	A	B	-	-	A	-	A	A	-	-	A	-	-	-	-	B	A	A	-	A	-	-	A	B	-	A	-	-	-	-	A	-	B	A	-	-	B	B	A	A	B	A	A	A
BS00010316	3B	149.9	-	B	A	A	B	B	B	A	B	A	A	B	A	A	B	B	B	-	B	A	A	A	A	-	A	A	B	A	A	A	A	B	A	A	A	B	A	-	A	B	B	A	A	B	A	A	A
BS00017577	3B	149.9	B	B	A	A	B	B	B	A	B	A	A	-	A	A	B	B	B	-	B	A	A	-	-	-	-	A	B	A	-	-	-	-	A	A	A	B	-	-	A	B	B	A	A	B	A	A	-
BS00020861	3B	149.9	B	B	A	A	B	B	B	A	B	A	A	B	A	A	B	B	B	-	-	A	A	A	A	-	A	-	B	A	A	-	A	B	A	A	A	B	A	-	A	B	B	A	A	-	A	A	A
BS00022021	3B	149.9	B	B	-	-	B	B	B	A	B	A	-	B	A	A	B	B	B	-	B	A	A	-	A	A	A	A	B	A	A	A	A	B	A	A	A	B	A	-	A	B	B	A	A	A	A	-	A
BS00022025	3B	149.9	B	B	A	A	B	B	B	A	B	A	-	B	A	A	B	B	B	A	B	A	A	A	A	A	A	A	B	A	A	A	A	B	-	A	A	B	A	B	A	B	B	A	A	A	A	A	A
BS00022039	3B	149.9	B	B	A	A	B	B	B	A	B	-	A	B	A	A	B	B	B	A	B	A	A	A	A	A	A	A	-	A	A	A	A	B	A	A	A	B	A	B	A	B	B	A	A	A	A	A	A
BS00022084	3B	149.9	B	-	A	A	B	B	B	A	B	A	A	B	A	A	B	B	B	A	B	A	A	-	A	A	A	A	B	A	A	A	A	B	A	A	A	B	A	B	A	B	B	A	A	A	A	A	-
BS00022512	3B	149.9	B	-	A	A	B	B	B	A	B	A	A	B	A	A	B	B	B	A	B	A	A	A	A	A	A	A	B	A	A	A	A	B	A	A	A	B	A	B	A	B	B	A	A	A	A	A	A
BS00022513	3B	149.9	B	B	A	A	B	B	B	A	B	A	A	B	A	A	B	-	B	A	B	-	A	A	A	A	A	A	B	A	A	A	A	B	A	A	-	B	A	B	-	B	-	A	-	A	A	-	A
BS00022826	3B	149.9	B	-	A	A	B	B	B	A	B	A	A	B	A	A	B	B	B	A	B	A	A	A	A	A	A	A	B	A	A	A	A	B	A	A	A	B	A	B	A	B	B	A	A	A	A	A	A
BS00022939	3B	149.9	-	B	A	-	B	B	B	A	B	A	-	-	A	A	B	B	B	-	B	-	A	A	A	A	A	A	B	-	A	A	A	B	A	A	A	B	A	B	A	B	B	A	A	A	A	A	-
BS00023030	3B	149.9	B	-	-	A	B	B	B	A	B	A	A	B	A	A	B	B	B	A	B	A	A	A	A	A	A	A	B	A	A	A	A	B	A	A	A	B	A	-	A	B	B	A	A	-	A	B	A
BS00023190	3B	149.9	B	B	-	A	-	B	B	A	B	-	-	-	-	A	B	B	B	A	B	A	A	A	A	A	-	A	-	A	A	A	A	B	A	A	A	B	A	B	-	B	B	A	A	A	A	A	A
BS00040001	3B	149.9	B	B	A	A	B	B	B	A	B	A	A	B	A	A	B	B	-	A	B	A	A	A	A	A	A	A	B	A	A	A	A	B	A	A	A	B	A	B	A	B	B	A	A	B	A	A	A
BS00069132	3B	149.9	B	B	A	A	B	B	B	A	B	A	A	-	A	A	B	B	-	A	B	A	A	A	A	A	A	A	B	A	A	A	A	B	A	A	A	B	A	B	A	B	B	A	A	B	A	A	A
BS00090595	3B	149.9	B	B	A	A	B	B	B	A	B	A	A	B	A	A	B	B	-	A	B	A	A	A	-	A	-	A	B	-	A	A	-	B	A	A	A	-	-	B	A	-	-	-	A	B	A	A	A
BS00098928	3B	149.9	B	B	A	A	B	B	B	A	B	A	A	B	A	A	B	B	-	A	B	A	A	A	A	A	A	A	B	A	A	A	A	B	A	A	A	B	A	B	A	B	B	A	A	B	A	A	A
BS00111311	3B	149.9	B	B	A	A	B	B	B	A	B	A	A	B	A	A	B	B	-	A	B	A	A	A	A	A	A	A	B	A	A	A	A	B	A	A	A	B	A	B	A	B	B	A	A	B	A	A	A
BS00059416	3B	156.3	B	B	A	A	B	B	B	A	B	A	A	B	A	A	B	B	-	A	B	A	A	A	B	A	A	A	A	A	A	A	A	B	A	A	A	A	B	B	A	B	B	A	A	-	A	A	A
BS00059417	3B	156.3	B	B	A	A	B	B	B	A	B	A	A	B	A	A	B	B	-	A	B	A	A	A	B	A	A	A	A	A	A	A	A	B	A	A	A	-	-	-	A	-	-	A	A	B	A	A	A
BS00022403	3B	158.5	B	B	A	A	-	B	-	A	-	-	A	-	-	A	-	-	-	-	B	-	A	-	B	-	-	-	-	-	A	-	A	B	-	A	-	-	-	B	A	B	B	A	-	A	A	-	A
BS00022245	3B	159.4	B	B	A	A	B	B	B	A	B	B	A	B	A	-	B	-	B	A	B	-	A	A	B	A	A	A	A	A	A	A	A	B	A	A	-	A	B	-	-	B	B	A	-	A	-	B	-
BS00105878	3B	162.8	B	B	A	A	B	B	B	A	B	A	A	B	A	A	B	B	-	A	B	A	A	A	B	A	A	A	A	A	A	A	A	B	A	A	A	A	B	B	A	B	B	A	A	B	A	A	-
BS00010572	3B	167.6	B	B	A	B	B	B	B	A	B	A	A	B	A	A	B	B	B	-	-	A	A	A	B	-	A	A	A	A	A	A	A	B	A	A	A	B	B	-	A	B	B	A	A	B	A	A	-
BS00022904	3B	167.6	B	B	A	B	B	B	B	A	B	-	A	B	A	A	B	B	B	-	B	A	A	A	B	-	A	A	A	A	A	A	A	B	A	-	A	B	B	B	-	B	B	A	A	-	A	-	A
BS00097374	3B	167.6	B	B	A	B	B	B	B	A	B	-	A	B	A	A	B	B	-	A	B	A	A	A	B	A	A	A	A	A	A	A	A	B	A	A	A	B	B	B	A	B	B	A	A	B	A	A	A
wPt-5769	3B	168.4	B	B	A	-	B	B	B	A	B	A	A	-	A	A	B	B	B	A	B	A	-	A	-	-	A	A	A	A	A	A	A	B	A	A	-	B	B	B	A	B	-	A	-	B	A	A	A
wPt-3005	3B	176.8	B	-	A	-	B	-	A	A	B	A	A	A	A	A	B	B	B	A	A	A	A	A	A	A	-	A	A	-	-	A	A	B	A	A	-	B	B	B	A	B	B	B	A	A	A	A	A
BS00021978	3B	181.1	B	B	A	B	B	-	A	A	B	A	A	A	A	A	B	B	B	A	A	A	A	A	-	A	A	A	-	A	A	A	A	B	B	A	A	B	B	B	A	B	B	B	A	-	A	-	A
BS00030651	3B	182.3	B	B	A	B	B	B	A	A	B	A	A	A	A	A	B	B	-	A	A	A	A	A	A	A	A	A	A	A	A	A	A	B	B	A	A	B	B	B	A	B	B	B	A	A	A	A	A
BS00054850	3B	190	B	-	A	-	B	A	A	A	B	A	-	A	B	A	A	B	-	A	A	A	B	A	B	A	A	A	A	A	A	A	A	B	B	A	A	A	B	B	A	B	B	-	A	A	A	A	-
BS00070210	3B	190.7	B	B	A	B	B	A	A	A	B	A	A	A	B	A	A	B	-	A	A	B	B	-	B	A	A	A	-	A	A	A	A	-	-	A	A	-	-	-	A	-	B	A	A	A	-	A	-
wmc326	3B	194.6	B	B	A	B	B	A	A	A	B	A	A	A	B	A	A	B	B	A	A	B	B	A	B	A	A	A	A	A	A	A	A	B	B	A	-	A	A	B	A	B	B	B	A	A	A	A	A
BS00022715	3B	208.4	B	B	-	B	B	A	A	B	B	A	-	-	B	A	B	-	B	A	A	-	B	B	B	A	A	A	-	A	A	A	A	A	B	A	A	A	A	B	A	B	B	B	B	-	B	A	-
BS00037871	3B	209.6	B	B	A	-	B	A	A	B	B	A	A	A	B	A	B	B	-	A	A	B	B	B	B	A	A	A	A	A	A	A	A	A	B	A	A	A	A	B	A	B	B	B	B	A	B	A	A
BS00071597	3B	209.6	B	B	A	B	B	A	A	B	B	A	A	A	B	A	B	B	-	A	A	B	B	B	B	A	A	A	A	A	A	A	A	A	B	A	A	A	A	B	A	B	B	B	B	A	B	A	A
BS00074629	3B	209.6	B	B	A	B	-	A	A	B	B	A	A	A	B	A	B	B	-	A	A	B	B	B	B	-	A	A	A	A	A	A	A	A	B	A	A	A	A	B	A	B	B	B	B	A	B	-	A
BS00003836	3B	214.2	B	B	A	B	B	A	A	B	B	A	A	A	B	A	B	B	B	-	-	B	B	B	B	-	A	A	A	A	A	A	A	A	B	A	A	A	A	-	A	B	B	B	B	A	B	A	A
wPt-9368	3B	214.2	B	B	A	B	B	A	A	B	B	A	A	A	B	A	B	B	B	A	A	B	B	B	B	B	A	A	A	A	A	A	A	A	B	A	-	A	A	B	A	B	B	B	B	A	B	A	-
BS00003931	3B	214.8	B	B	A	B	B	A	A	B	B	A	A	A	B	A	B	B	B	-	-	B	B	B	B	-	A	A	A	A	A	A	A	A	B	A	A	A	A	-	A	B	B	B	B	A	B	A	A
BS00065018	3B	214.8	B	B	A	B	B	A	A	B	B	A	A	A	B	A	B	B	-	A	A	B	B	B	B	B	A	A	A	A	A	A	A	A	B	A	A	A	A	B	A	B	B	B	B	A	B	A	A
BS00021967	3B	215.5	B	-	A	-	-	A	A	B	B	A	-	A	-	A	-	B	B	A	A	-	B	-	B	-	-	A	-	-	A	A	A	A	B	A	-	A	-	-	-	-	-	-	B	B	B	A	A
BS00022441	3B	215.5	B	B	A	B	B	A	A	B	B	A	-	-	B	A	B	B	B	-	A	B	B	B	B	B	A	A	A	-	A	A	A	A	B	A	A	A	A	B	A	B	B	B	B	B	B	A	A
wPt-8845	3B	227.2	B	-	A	A	A	A	A	B	B	A	A	A	B	B	B	B	B	B	A	B	B	B	B	B	A	A	-	A	B	A	A	B	B	A	-	A	A	B	A	B	B	B	B	B	B	A	B
BS00062859	3B	234.4	B	B	A	A	A	A	A	B	A	A	A	A	B	B	B	B	-	-	A	B	B	-	B	B	-	A	-	A	B	A	A	B	B	A	B	-	A	B	B	B	B	-	-	B	B	A	-
BS00003717	3B	236.4	B	B	A	A	A	A	A	B	A	A	A	A	B	B	B	B	-	-	-	B	B	B	B	-	A	A	A	A	B	A	A	B	B	A	B	A	A	-	B	B	B	B	B	B	B	A	B
BS00009671	3B	236.4	-	B	A	-	A	A	A	B	A	A	A	-	B	B	B	-	B	-	A	B	B	B	B	-	A	A	A	A	B	A	A	B	B	A	B	A	A	-	B	B	B	B	B	B	B	A	B
BS00011898	3B	236.4	B	B	A	A	A	A	A	B	A	A	A	A	B	B	B	B	B	-	A	B	B	B	B	-	A	A	A	A	B	A	A	B	B	A	B	A	A	-	B	B	B	B	B	B	B	A	B
BS00022401	3B	236.4	B	B	A	A	A	A	A	-	A	-	A	A	-	-	-	B	-	B	-	-	B	-	B	-	-	A	-	A	B	A	-	-	-	A	-	A	-	-	-	B	B	B	-	-	B	A	-
BS00003884	3B	239.3	B	B	A	A	A	A	A	B	A	B	A	A	B	B	B	B	B	-	-	B	B	B	B	-	A	A	A	A	B	A	A	B	B	A	B	A	A	-	B	B	B	B	B	B	B	A	-
BS00036547	3B	239.3	B	B	A	A	A	A	A	B	A	B	A	A	B	B	B	B	-	B	A	B	B	B	B	B	A	A	A	A	B	A	A	B	B	A	B	A	A	B	B	B	B	B	B	B	B	A	-
BS00042085	3B	239.3	B	B	-	A	A	A	A	B	A	-	A	A	B	B	B	B	-	B	A	B	B	B	B	B	A	A	A	A	B	A	A	B	B	A	B	-	-	B	B	-	B	B	B	B	B	A	A
BS00071108	3B	239.3	B	B	A	A	A	A	A	B	A	B	A	A	B	B	B	B	-	B	A	B	B	B	B	B	A	A	A	A	B	A	A	B	B	A	B	A	A	B	B	B	B	B	B	B	B	A	A
BS00071183	3B	239.3	B	B	A	A	A	A	A	B	A	B	A	A	B	B	B	B	-	B	A	B	B	B	B	B	A	A	A	A	B	A	A	B	B	A	B	A	A	B	B	B	B	B	B	B	B	A	A
BS00073411	3B	239.3	B	B	A	A	A	A	A	B	A	B	A	A	B	B	B	B	-	-	A	B	B	B	B	B	A	A	-	A	B	A	-	B	B	A	B	-	-	-	-	-	B	-	B	B	B	A	A
BS00076923	3B	239.3	B	B	A	A	A	A	A	B	A	B	A	A	B	B	B	B	-	B	A	B	B	B	B	B	A	A	A	A	B	A	A	B	B	A	B	A	A	B	B	B	B	B	B	B	B	A	A
cos4Gb	3B	239.3	B	B	A	A	-	A	A	-	A	B	A	A	B	-	B	B	-	B	A	B	B	B	B	-	A	A	A	A	B	-	A	B	B	A	-	A	A	B	-	B	B	B	B	B	B	A	B
wPt-4412	3B	239.3	-	B	A	A	A	A	A	B	A	B	A	A	B	B	B	B	B	B	A	B	B	B	B	B	A	A	A	A	B	A	A	B	B	A	-	A	A	B	B	B	B	B	B	B	B	A	B
gwm547	3B	240.5	B	B	A	A	A	A	B	B	A	B	A	A	B	B	B	B	B	B	A	B	B	B	B	B	A	A	A	A	B	A	A	B	B	A	-	A	A	B	B	B	B	B	B	B	B	A	B
BS00129989	3D	0	B	A	A	B	A	B	A	A	B	B	A	A	B	B	A	B	-	B	B	B	B	B	A	B	A	A	A	A	A	B	A	B	B	B	B	A	A	B	A	A	B	A	A	A	A	A	A
BS00148615	3D	0	B	A	A	B	A	B	A	A	B	B	A	A	B	B	A	B	-	B	B	B	B	-	A	B	A	A	A	A	A	B	A	B	B	B	B	A	A	B	A	A	B	A	A	A	A	A	A
BS00065928	3D	10.1	B	A	A	B	A	B	B	A	B	B	A	A	B	B	B	B	-	B	B	B	B	-	A	B	B	A	A	A	A	B	A	B	A	B	B	A	A	B	A	A	-	A	A	A	B	A	A
cfd4	3D	22.3	-	-	-	-	-	-	-	-	-	-	-	-	-	-	-	-	-	-	-	-	-	-	-	-	-	-	-	-	-	-	-	-	-	-	-	-	-	-	-	-	-	-	-	-	-	-	-
gwm456A	3D	22.3	-	B	A	B	A	B	A	-	A	B	A	A	A	B	A	A	B	B	A	A	B	B	A	B	A	B	A	A	A	B	A	B	B	A	-	A	B	B	A	A	B	A	B	A	A	A	A
BS00140532	3D	24.1	B	B	A	B	A	B	A	B	A	B	A	A	A	B	A	A	-	B	A	A	B	B	A	B	A	B	A	A	A	B	A	B	B	A	B	-	B	B	A	A	B	A	B	A	A	A	A
BS00154726	3D	24.6	B	B	A	-	A	B	A	B	A	B	A	A	A	B	A	A	-	B	A	A	B	B	A	B	A	B	A	A	A	B	A	B	B	A	B	A	B	B	A	A	B	A	B	A	A	A	B
BS00185484	3D	25.8	B	B	A	B	A	B	A	B	A	B	A	A	A	B	A	A	-	B	A	A	B	B	A	B	A	-	A	A	A	B	A	B	B	A	B	A	B	B	A	A	-	A	B	A	A	A	B
BS00149712	3D	26.3	B	B	A	B	A	B	A	B	A	B	A	A	A	B	A	A	-	B	A	A	B	B	A	B	A	B	A	A	A	B	A	B	B	A	B	A	B	B	A	A	B	A	B	A	A	A	A
gdm72	3D	28.1	B	B	A	B	A	B	A	B	A	B	A	A	-	-	A	A	B	B	A	A	B	B	A	-	A	B	A	A	A	B	A	B	B	A	-	A	B	B	A	A	B	A	B	-	A	A	A
wmc505c	3D	28.1	B	B	A	B	-	B	A	-	A	B	A	A	A	-	A	A	-	B	A	A	B	B	A	-	A	B	A	A	A	-	A	B	B	A	-	A	B	B	-	A	B	A	B	A	A	A	A
gwm52	3D	29.5	B	B	A	B	A	B	A	B	A	B	A	A	A	B	A	A	B	B	A	A	B	B	A	B	-	B	-	A	A	B	A	B	B	A	-	A	B	B	A	A	B	B	B	A	A	A	A
BS00021930	3D	30.2	-	-	A	B	A	B	A	B	A	-	A	A	A	B	A	A	B	-	A	A	-	-	A	-	A	B	A	-	A	B	A	B	B	A	B	A	-	-	A	A	B	B	B	A	A	-	-
BS00022212	3D	30.2	B	-	A	B	-	B	A	B	A	B	A	-	A	B	A	-	B	B	A	-	B	B	A	B	A	B	A	A	A	B	A	B	B	-	-	-	-	-	-	A	B	-	-	-	A	A	-
BS00034812	3D	30.2	-	B	A	B	A	B	-	B	A	B	-	A	A	B	A	A	-	B	A	A	B	-	A	B	A	B	A	A	A	B	A	B	B	A	B	A	B	B	A	A	B	B	B	-	A	A	B
BS00160205	3D	33.7	B	B	A	B	A	B	A	B	A	B	A	A	A	B	A	A	-	B	A	A	B	B	A	B	A	B	A	A	A	B	A	B	B	A	B	A	B	B	A	A	B	B	-	A	A	A	A
BS00082501	3D	34.7	B	B	A	B	A	B	A	B	A	B	A	A	A	B	A	A	-	B	A	A	B	B	A	B	A	B	A	A	A	B	A	B	B	A	B	A	B	B	A	A	B	B	B	A	A	A	A
BS00183559	3D	34.7	B	B	A	B	A	B	A	B	A	B	A	A	A	B	A	A	-	B	A	A	B	B	A	B	A	B	A	A	A	B	A	B	B	A	B	A	B	B	A	A	B	B	B	A	A	A	A
BS00000447	3D	37.2	B	B	A	B	A	B	A	B	A	B	A	A	A	B	A	A	-	B	A	A	B	B	A	B	A	B	A	A	A	B	A	B	B	A	B	A	-	B	-	-	B	B	B	A	A	A	A
BS00093870	3D	37.2	B	B	A	B	A	B	A	B	A	B	A	A	A	B	A	A	-	-	-	A	B	-	A	B	-	B	-	A	A	B	-	B	B	A	B	-	-	B	A	-	-	B	B	A	A	A	A
BS00139500	3D	40	B	B	A	B	A	B	A	B	A	B	A	A	A	B	A	A	-	B	A	A	B	B	A	B	A	B	A	A	A	B	A	B	B	A	B	A	B	B	A	A	B	B	B	A	A	A	-
BS00021920	3D	41.2	B	B	A	B	A	B	A	B	A	B	A	A	A	B	A	A	B	-	A	A	B	B	A	-	A	B	A	A	A	B	A	B	B	A	B	A	B	-	A	A	B	B	B	A	A	A	A
BS00022166	3D	41.8	B	B	A	B	-	B	A	B	A	B	A	A	A	B	A	A	-	B	A	A	-	B	A	B	A	B	A	A	A	B	A	B	B	A	B	A	B	B	A	A	B	A	B	-	A	A	-
BS00011395	3D	46.1	B	-	A	-	A	-	-	A	B	-	-	-	A	B	A	A	B	-	A	A	-	B	A	-	A	-	A	A	A	-	A	B	B	A	-	A	B	-	A	A	B	A	B	A	A	A	-
BS00011738	3D	46.1	B	B	A	B	A	B	A	A	B	B	A	A	A	B	A	A	B	-	A	A	B	B	A	-	A	B	A	A	A	B	A	B	B	A	B	A	B	-	A	A	B	A	B	A	A	A	A
BS00010258	3D	47.2	-	-	-	-	-	-	-	-	B	B	A	A	A	-	A	A	B	-	A	-	-	B	A	-	A	B	-	-	A	A	A	B	B	A	-	-	-	-	A	A	B	A	-	A	-	-	A
gwm314	3D	52.6	-	-	-	-	-	-	-	A	-	-	-	-	-	A	-	-	B	-	-	-	-	-	-	B	-	-	-	-	-	B	A	-	-	-	-	-	-	-	A	-	-	-	-	-	-	-	-
BS00067163	3D	61.8	B	B	A	B	A	B	B	A	B	A	A	A	A	B	A	A	-	A	A	A	B	B	A	B	A	B	B	A	A	B	A	B	B	B	A	A	B	B	A	A	A	A	B	A	B	A	B
BS00122454	3D	61.8	-	B	-	B	-	B	B	A	B	A	A	A	A	B	A	A	-	-	A	A	B	B	A	B	-	B	B	A	A	B	A	B	B	B	A	A	B	B	A	A	-	A	B	A	B	-	B
s02TCAC	3D	64.9	B	B	B	B	A	B	B	A	B	A	A	A	A	B	A	A	B	A	A	A	B	B	A	B	A	B	B	A	A	B	A	B	B	B	-	A	B	B	A	A	A	A	B	A	B	B	B
BS00022501	3D	66.8	B	A	-	-	-	B	B	A	B	A	A	A	A	B	A	A	B	A	A	A	B	B	A	B	A	B	B	A	A	B	A	B	B	B	A	A	B	-	A	A	A	A	B	-	B	B	A
BS00098058	3D	66.8	B	A	A	B	A	B	B	A	B	A	A	A	A	B	A	A	-	A	A	A	B	B	A	B	A	B	B	A	A	B	A	B	B	B	A	-	-	B	A	-	-	A	B	A	B	B	A
BS00117841	3D	72.7	B	A	A	B	A	B	B	-	B	A	A	A	A	B	B	A	-	A	A	A	B	B	A	B	A	B	B	A	A	B	A	B	B	B	A	A	B	B	A	A	B	A	B	A	B	B	A
BS00037276	3D	88.6	B	A	-	B	B	B	B	A	B	A	A	B	A	A	B	B	-	A	A	A	B	B	A	B	A	A	-	A	A	B	A	B	B	A	A	-	-	B	B	-	-	-	B	A	B	B	-
cfd9	3D	91.6	-	-	-	-	B	-	-	A	-	-	-	-	-	A	-	-	B	-	-	-	-	-	-	B	-	-	-	-	-	B	-	-	-	-	-	-	-	-	B	-	-	-	-	-	-	-	-
BS00121480	3D	97.3	B	A	A	B	B	B	B	A	B	A	A	B	B	A	B	B	-	A	A	B	B	A	B	B	A	A	-	A	A	B	A	B	B	A	A	A	A	B	B	A	A	A	B	A	B	A	B
BS00122945	3D	97.3	B	A	A	B	B	B	B	A	B	A	A	B	B	A	B	B	-	A	A	B	B	A	B	B	A	A	A	A	A	B	A	B	B	A	A	A	A	B	B	A	A	A	B	A	B	A	B
BS00147238	3D	97.3	B	A	A	B	B	B	B	A	B	A	A	B	B	A	B	B	-	A	A	B	B	A	B	B	A	A	A	A	A	B	A	B	B	A	A	A	A	B	B	A	A	A	B	A	B	A	B
BS00003688	3D	97.8	B	A	A	B	B	B	B	A	B	A	A	B	B	A	B	B	B	-	-	B	B	A	B	-	A	A	A	A	A	B	A	B	B	A	A	A	A	-	B	A	A	A	B	A	B	A	B
BS00113692	3D	97.8	B	A	A	B	B	B	B	A	B	A	A	B	B	A	B	B	-	A	A	B	B	A	B	B	A	A	A	A	A	B	A	B	B	A	A	A	A	B	B	A	A	A	B	A	B	A	B
BS00126779	3D	97.8	B	A	-	B	B	B	B	A	B	A	A	B	B	A	B	B	-	-	A	-	B	A	B	B	A	A	A	A	A	B	A	B	B	A	A	A	A	B	B	A	A	A	B	A	B	A	B
BS00140559	3D	97.8	B	A	A	B	B	B	B	A	B	A	A	B	B	A	B	B	-	A	A	B	B	A	B	B	A	A	A	A	A	B	A	B	B	A	A	A	A	B	B	A	A	A	B	A	B	A	B
BS00021850	3D	98.4	B	A	A	B	B	B	B	-	-	A	A	B	B	A	B	B	B	-	A	B	B	-	B	-	A	A	A	-	A	B	A	B	B	A	A	A	-	-	B	A	A	A	B	A	B	B	B
BS00021919	3D	98.4	B	A	A	B	B	B	B	A	B	A	A	B	B	A	B	B	B	-	A	B	B	A	B	-	A	A	A	A	A	B	A	B	B	A	A	A	A	-	B	A	A	A	B	A	B	-	B
BS00098495	3D	100.8	A	A	A	B	B	B	B	A	B	A	A	B	B	A	B	B	-	A	A	B	B	A	B	B	A	A	A	A	A	B	A	B	B	A	A	-	A	B	A	A	A	A	B	A	B	A	A
BS00097485	3D	116.1	A	B	A	B	B	B	A	A	B	A	A	B	B	A	B	B	-	A	A	B	B	B	B	B	B	A	A	A	A	B	A	B	B	A	A	A	B	B	A	A	A	A	A	B	B	A	A
BS00108852	4A	0	B	A	A	B	B	B	A	B	A	-	B	B	-	B	A	A	-	A	B	A	B	B	-	A	B	-	A	A	B	-	A	B	A	A	A	-	B	B	B	A	B	B	B	B	A	A	-
BS00000818	4A	1.3	B	A	A	B	A	B	A	B	A	B	B	B	A	B	A	A	-	A	B	A	B	B	B	A	B	A	A	A	B	A	A	B	A	A	A	B	B	B	B	A	-	-	B	B	A	A	A
BS00043286	4A	1.3	B	A	A	B	A	B	A	B	A	B	B	B	A	B	A	A	-	A	B	A	B	B	B	A	B	A	A	A	B	A	-	B	A	A	A	-	-	B	B	-	B	B	B	B	A	-	A
BS00003914	4A	1.9	-	A	A	B	A	B	A	B	-	B	B	B	A	B	A	A	A	-	-	A	B	B	B	-	B	-	A	A	B	-	A	B	A	A	A	B	B	-	B	A	-	B	B	B	A	-	B
BS00017267	4A	8.1	A	A	-	B	B	B	A	B	B	-	B	-	A	B	A	A	A	-	B	B	B	B	B	-	B	A	-	A	-	A	A	B	-	-	A	B	B	-	B	-	A	-	B	B	A	B	-
BS00001207	4A	8.8	A	A	A	B	-	B	A	B	B	B	B	B	A	B	A	A	A	-	-	B	B	B	B	-	B	-	A	A	B	-	A	B	A	B	A	B	B	-	B	A	A	B	B	B	A	B	A
BS00003776	4A	8.8	A	A	A	B	B	B	A	B	B	B	B	B	A	B	A	A	A	-	B	B	B	B	B	-	B	A	A	A	B	A	A	B	A	B	A	B	B	-	B	A	A	B	B	B	A	B	-
BS00036493	4A	8.8	A	A	A	B	B	B	A	B	B	B	B	B	A	B	A	A	-	A	B	B	B	B	B	A	B	A	A	A	B	A	A	B	A	B	A	B	B	B	B	A	A	B	B	B	A	B	A
BS00091034	4A	12.2	A	A	A	A	B	A	A	B	B	B	B	B	A	B	A	A	-	A	B	B	B	B	B	A	B	A	A	A	B	A	A	B	A	B	A	B	B	B	B	A	A	B	B	B	A	B	A
BS00022015	4A	13.5	A	A	-	-	B	A	-	B	B	-	-	B	A	B	A	A	A	-	B	B	-	-	B	A	B	A	A	A	B	A	A	B	A	B	A	B	B	-	B	A	A	B	B	-	A	B	A
BS00065607	4A	13.5	A	A	A	A	B	A	A	B	B	B	B	B	A	B	A	A	-	A	B	B	B	B	B	A	B	A	A	A	B	A	A	B	A	B	A	B	B	B	B	A	A	B	B	B	A	B	A
BS00068885	4A	13.5	A	A	A	A	B	A	A	B	B	B	B	B	A	B	A	A	-	A	B	B	B	B	B	A	B	A	A	A	B	A	A	B	A	B	A	B	B	B	B	A	A	B	B	B	A	B	A
BS00011060	4A	15.9	A	A	A	A	B	A	A	B	B	B	B	B	A	B	A	A	A	-	B	B	B	B	B	-	B	A	A	A	B	A	A	B	A	B	A	B	B	-	B	A	A	B	B	-	A	-	B
BS00022125	4A	20.8	A	A	A	B	B	A	A	B	B	B	B	B	A	B	A	A	-	A	B	B	B	B	B	A	A	A	B	A	B	B	A	B	A	B	A	B	B	B	B	A	A	B	B	A	A	B	-
BS00022189	4A	21.4	A	-	-	B	B	A	A	B	B	B	-	B	A	B	A	A	-	A	B	B	-	B	B	A	A	A	B	A	B	B	A	B	A	B	A	B	B	B	B	A	A	B	B	A	A	-	B
BS00011173	4A	22.6	A	A	A	B	B	A	A	B	B	B	B	B	A	B	A	A	A	-	B	B	B	B	B	-	A	A	B	A	B	B	A	B	A	B	A	B	-	-	B	A	A	B	B	B	A	-	B
BS00011378	4A	22.6	A	A	A	B	B	A	A	B	B	B	B	B	-	B	A	A	-	-	B	B	B	B	B	-	A	A	B	A	B	B	A	B	A	B	A	B	B	-	B	A	A	B	B	B	A	B	B
BS00010339	4A	27.5	A	B	A	B	B	A	A	B	B	B	B	B	A	B	A	A	A	-	B	B	B	B	B	-	A	A	B	A	B	B	A	B	A	B	A	B	B	-	B	A	A	B	B	B	A	B	A
BS00010925	4A	27.5	A	B	A	B	B	A	A	B	B	B	B	B	A	B	A	A	A	-	B	B	B	B	B	-	A	A	B	A	B	B	A	B	A	B	A	B	B	-	B	A	A	B	B	B	A	B	A
BS00011273	4A	27.5	A	B	A	B	B	A	A	B	B	B	B	B	A	B	A	A	A	-	B	B	B	B	B	-	A	A	B	A	B	B	A	B	A	B	A	B	B	-	B	A	A	B	B	B	A	B	A
BS00011628	4A	27.5	A	B	A	B	B	A	A	B	B	B	B	B	A	B	A	A	A	-	B	B	B	B	B	-	A	A	B	A	B	B	A	B	A	B	A	B	B	-	B	A	A	B	B	B	A	B	A
BS00012054	4A	27.5	A	B	A	B	B	A	A	B	B	B	B	B	A	B	A	A	A	-	B	B	B	B	B	-	A	A	B	A	B	B	A	B	A	B	A	B	B	-	B	A	A	B	B	B	A	B	A
BS00035122	4A	27.5	A	B	A	B	B	A	A	B	B	B	B	B	A	B	A	A	-	A	B	B	B	B	B	A	A	A	B	A	B	B	A	B	A	B	A	B	B	B	B	A	A	B	B	B	A	-	-
BS00083818	4A	27.5	A	B	A	B	B	A	A	B	B	B	B	B	A	B	A	A	-	A	-	B	B	B	B	A	A	A	-	A	B	B	-	B	-	B	A	-	-	A	B	-	-	-	B	B	A	B	A
cos4GA	4A	27.5	A	B	A	B	-	A	A	-	B	B	B	B	A	-	A	A	-	A	B	B	B	B	B	-	A	A	B	A	B	-	A	B	A	B	-	B	B	B	-	A	A	B	B	B	A	B	A
BS00001241	4A	28.1	A	B	A	B	B	A	A	B	B	B	B	B	A	B	A	A	A	-	-	B	B	B	B	-	A	A	B	A	B	B	A	B	A	B	A	B	B	-	B	A	A	B	B	B	A	B	B
BS00009974	4A	28.1	A	B	A	B	B	A	A	B	B	B	B	B	A	B	A	A	A	-	B	B	B	B	B	-	A	A	B	A	B	B	A	B	A	B	A	B	B	-	B	A	A	B	B	B	A	B	B
BS00011261	4A	28.1	A	B	A	B	B	A	A	B	B	B	B	B	A	B	A	A	A	-	B	B	B	B	B	-	A	A	B	A	B	B	A	B	A	B	A	B	B	-	B	A	A	B	B	B	A	B	B
BS00021736	4A	28.1	A	B	A	B	B	A	A	B	B	B	B	-	A	B	A	A	A	-	B	B	B	B	B	-	A	A	B	A	B	B	A	B	A	B	A	B	B	-	B	A	A	B	B	B	A	B	B
BS00036472	4A	28.1	A	B	A	B	B	A	A	B	B	B	B	B	A	B	A	A	-	A	B	B	B	B	B	A	A	A	B	A	B	B	A	B	A	B	A	B	B	B	B	A	A	B	B	B	A	B	B
BS00022169	4A	28.7	A	-	A	B	B	A	A	B	B	B	-	B	A	B	A	A	A	A	B	B	B	B	B	A	A	A	B	A	B	B	A	B	A	B	-	B	B	B	B	A	A	B	B	A	A	-	B
BS00022174	4A	28.7	A	B	A	B	B	A	A	B	B	-	B	B	A	B	A	A	A	A	B	B	B	B	B	A	A	A	B	A	B	B	A	B	A	B	A	B	B	B	B	A	A	B	B	A	A	B	B
BS00009492	4A	29.2	A	B	A	B	B	-	A	B	B	B	B	B	A	B	A	A	A	-	B	B	B	-	B	-	A	A	B	A	B	B	A	-	A	B	A	B	B	-	B	A	A	B	B	B	-	B	A
BS00011224	4A	29.2	A	B	A	B	B	A	A	B	B	B	B	B	A	B	A	A	A	-	B	B	B	B	B	-	A	A	B	A	B	B	A	B	A	B	A	B	B	-	B	A	A	B	B	B	A	B	A
BS00015312	4A	29.2	A	-	A	B	B	A	-	B	B	B	-	-	A	B	A	A	A	-	B	B	B	B	B	-	A	A	B	A	B	B	A	B	A	B	-	B	B	-	B	A	A	B	B	B	A	B	A
BS00022661	4A	29.2	-	B	A	B	B	A	A	B	B	B	B	B	A	B	A	A	A	-	B	B	B	-	B	A	A	A	B	A	B	B	A	B	A	B	A	B	B	B	B	A	A	B	B	A	A	B	-
BS00022816	4A	29.2	A	-	A	B	-	-	-	B	B	B	B	B	-	B	-	-	A	A	B	-	-	B	B	-	A	-	-	A	B	-	A	B	A	B	-	B	B	B	-	A	A	B	-	-	-	B	-
BS00049911	4A	29.2	A	B	A	-	B	A	A	B	-	B	B	B	A	B	A	A	-	A	B	B	B	A	B	A	A	A	B	A	B	B	A	B	A	B	A	-	B	B	B	A	A	B	B	B	B	B	A
BS00072629	4A	29.2	A	B	A	B	B	A	A	B	B	B	B	B	A	B	A	A	-	A	B	B	B	B	B	A	A	A	B	A	B	-	A	B	A	-	A	-	B	B	B	A	A	B	B	B	A	B	A
BS00077716	4A	30.5	A	B	A	B	B	A	A	B	B	B	B	B	A	B	A	A	-	A	B	B	B	A	B	A	A	A	B	-	B	B	-	-	-	B	A	B	-	B	B	-	-	B	B	B	B	B	B
BS00010455	4A	31.2	A	B	A	-	B	A	A	B	B	B	B	B	A	B	A	A	A	-	B	B	B	A	B	-	A	A	B	A	B	B	A	B	A	B	A	B	B	-	B	A	A	B	B	B	B	B	B
BS00019518	4A	31.2	A	B	A	B	B	A	A	B	B	B	B	B	A	B	A	A	A	-	B	B	-	A	B	-	A	-	B	A	-	B	A	B	-	B	A	B	B	-	B	A	A	B	B	B	B	B	B
BS00094367	4A	31.2	A	B	A	B	B	A	A	B	B	B	-	B	A	B	A	A	-	A	B	B	B	A	B	A	A	A	B	A	B	B	A	B	A	B	A	B	B	B	B	-	A	-	B	B	B	B	-
BS00022213	4A	31.8	A	B	-	B	B	A	A	B	B	B	B	B	A	B	A	A	A	A	B	B	B	A	B	A	A	A	B	A	B	B	A	B	A	B	A	B	B	B	B	A	A	B	B	A	B	B	B
BS00023031	4A	31.8	A	B	A	-	B	A	A	B	B	B	B	B	A	B	A	A	A	A	B	B	B	A	B	A	-	A	-	A	B	B	A	B	A	B	A	B	B	B	B	A	A	B	B	A	B	B	B
BS00064979	4A	32.4	A	B	A	B	B	A	A	B	B	B	B	B	A	B	A	A	-	A	B	B	B	A	B	A	A	A	B	A	B	B	A	B	A	B	A	B	-	B	B	A	A	B	B	B	B	B	B
BS00107766	4A	32.4	A	B	A	B	B	A	A	B	B	B	B	B	A	B	A	A	-	A	B	B	B	A	B	A	A	A	B	A	B	B	A	B	A	B	A	B	B	B	B	A	A	B	B	B	B	B	B
BS00003623	4A	35.3	A	B	A	B	A	A	A	B	B	B	B	B	A	B	A	A	A	-	-	B	B	A	B	-	A	A	B	A	B	B	A	B	A	B	A	B	B	-	B	A	B	B	B	B	B	B	B
dupw4	4A	35.3	A	B	A	B	A	-	-	B	B	B	B	-	-	B	A	-	A	-	-	B	-	-	B	A	A	-	B	-	B	-	A	-	A	B	-	-	B	B	B	A	-	-	-	-	-	-	B
bArc170	4A	38.9	A	B	A	B	A	A	-	A	B	B	B	B	A	B	A	A	A	A	B	B	B	A	B	A	A	B	B	A	B	B	A	B	A	B	-	B	B	B	B	A	B	B	B	B	B	B	B
BS99999979	4A	38.9	A	B	A	B	A	A	A	A	B	B	B	B	A	B	A	A	-	A	B	B	B	A	B	A	A	B	B	A	B	B	A	B	A	B	A	B	B	B	B	A	-	B	B	B	B	B	A
PHSZXQ118	4A	38.9	A	B	A	B	A	A	A	A	B	B	B	B	A	B	A	A	A	A	B	B	B	A	B	A	A	B	B	A	B	B	A	B	A	B	-	B	B	B	B	A	B	B	-	-	-	-	-
BS00003674	4A	44.7	A	B	A	B	A	A	A	A	B	B	B	B	A	B	B	A	A	-	-	B	B	A	B	-	A	-	B	-	B	-	A	B	A	B	-	B	B	-	A	A	B	B	B	B	B	B	A
BS00010216	4A	44.7	A	B	A	B	A	A	A	-	B	B	B	B	A	B	B	A	A	-	B	B	B	A	B	-	A	B	B	-	B	B	A	B	A	B	A	B	B	-	A	A	B	B	B	B	B	B	A
BS00010504	4A	45.3	A	B	A	B	A	A	B	A	B	B	B	B	A	B	B	A	A	-	B	B	B	A	B	-	A	B	B	A	B	B	A	B	A	B	A	B	B	-	A	A	B	B	B	B	B	B	A
BS00011115	4A	46.3	A	B	A	B	A	A	B	A	B	B	B	B	A	B	B	A	A	-	B	B	B	A	B	-	A	B	B	A	B	B	A	B	A	B	A	B	B	-	A	A	B	B	B	B	B	B	A
BS00022418	4A	46.3	A	B	A	B	A	A	B	A	B	B	-	B	A	B	B	A	A	-	B	B	B	A	B	A	A	B	B	-	B	B	A	B	A	B	A	B	B	B	A	A	B	B	B	-	B	B	-
BS00060097	4A	46.3	A	B	A	B	A	A	B	A	B	B	B	B	A	B	B	A	-	-	B	B	B	A	B	A	A	B	B	A	B	B	A	B	A	B	A	B	B	B	A	A	B	B	B	B	B	B	A
BS00064269	4A	46.3	A	B	A	B	A	A	B	A	B	B	B	B	A	B	B	A	-	A	B	B	B	A	B	A	A	B	B	A	B	B	A	B	A	B	A	B	B	B	A	A	B	B	B	B	B	B	B
BS00099725	4A	46.3	A	B	A	-	A	A	B	A	B	-	-	-	A	B	B	A	-	A	B	B	B	A	B	A	A	-	B	A	B	B	A	B	A	B	A	-	B	B	A	-	-	B	B	B	-	B	A
wmc258	4A	52.5	A	B	A	B	A	-	B	-	B	-	B	B	A	B	B	A	A	A	B	A	B	A	B	A	A	B	B	A	-	B	A	A	A	B	-	B	B	-	-	-	B	B	-	-	-	-	-
cos5V1	4A	57.4	-	B	A	B	-	A	B	-	B	B	B	B	A	-	B	A	-	A	B	A	B	A	B	-	A	B	B	A	B	-	A	A	-	B	-	B	B	B	-	A	-	A	-	B	B	-	B
wmc161	4A	57.4	A	B	A	B	A	-	-	A	B	B	B	-	-	B	B	-	B	-	-	A	-	-	B	A	A	-	B	-	B	-	A	-	A	B	-	-	B	B	B	A	-	-	-	-	-	-	B
BS00011939	4A	58.9	A	B	A	B	A	-	B	-	B	B	B	B	A	B	B	A	B	-	B	-	-	A	B	-	A	B	B	-	B	B	A	A	A	B	A	B	-	-	B	A	B	A	A	B	B	-	-
BS00010582	4A	62.7	A	B	A	B	A	A	B	A	B	B	B	B	A	B	B	A	B	-	-	A	B	A	B	-	A	B	B	A	B	B	B	A	A	B	A	B	B	-	B	A	B	A	A	B	B	B	A
[truncated: 1,689 more rows]
[truncated: 54 more columns]
