# Supplementary material for: QTL mapping of agronomic traits in wheat using the UK Avalon × Cadenza reference mapping population grown in Kazakhstan
Source: PeerJ. 2021 Feb 18;9:e10733. doi: 10.7717/peerj.10733 (PMC7897413; doi:10.7717/peerj.10733)
Supplement: Supplemental Information 2 [file peerj-09-10733-s002.xlsx]

## Sheet: Table S2
Table S2. List of stable QTLs identified in the Avalon x Cadenza mapping population
	Trait	QTL	Marker Interval	Position, cM	marker peak	Chr	Peak, cM	reference genome, bp	max. LOD	max. R2, %	Add. Effect	Allele	Карабалык														Караганда														Кызылорда
													2013				2014				2015				average		2013				2014				2015				average		2013				2014				2015
													1	2	3	av	1	2	3	av	1	2	3	av			1	2	3	av	1	2	3	av	1	2	3	av			1	2	3	av	1	2	3	av	1
1	heading time	QHt-AxC.ippb-1D	BS00123737 (BS00022188) -BS00022485	70,8-114,3	gdm111	1D	105.5	462203545-487957083	5.6	23	0,73/-0,73	Cadenza/Avalon				3.4				3.8				5.1	5.6
2	heading time	QHt-AxC.ippb-2D	BS00000002-wPt-3728 (BS00011313)	69,0-92,2	BS00021912	2D	76.5	75389775-64733097	5.7	16	1.73	Avalon																																5.7
3	heading time	QHt-AxC.ippb-5B	BS00009264 (BS00065913)-BS00062617	7,0-43,6	BS00011095	5B	27.7	4862138-21538493	5.8	16	1,79/-0,42	Cadenza/Avalon													3.1
4	heading time	QHt-AxC.ippb-6A	BS00023192-BS00086046	30,3-92,3	eATTmCGG100	6A	53.1	13806421-425277721	6.1	16	-0.53	Cadenza																			5.4								6.1
5	seed maturation time	QSmt-AxC.ippb-1A	gdm033 (BS00023118)-wPt-4029 (BS00001635)	0,0-14,3	BS00010488	1A	3.1	4048399-10067369	5.1	16	-0.94	Cadenza								5.1					3.7
6	seed maturation time	QSmt-AxC.ippb-5A	BS00011116-BS00021953	0,0-32,5	gwm129A	5A	6.1	414167574-464478676	4.4	15	-1.21	Cadenza												4.4
7	Plant height	QPh-AxC.ipbb-2A	wPt-5647 (BS00004385) -BS00094817	72,0-107,6	gwm296	2A	95.6	7853169-31177472	5.2	22	2.74	Avalon			5.2				5.2																									3
8	Plant height	QPh-AxC.ipbb-2B	BS00090594 -BS00064658	0,0-43,5	AFLP43-160bp	2B	13	6263398-40905185	4	14	2,25/-2,41	Avalon/Cadenza			5.2				4
9	Plant height	QPh-AxC.ipbb-2D	cfd36 (BS00003791)-BS00147940	13,1-51,0	gwm132	2D	26.9	13677182-68733980	11.6	19	-2.66	Avalon																			3.7										6.4	5.6	4.6	8.3		4.2	5.8	3.3	7.1
10	Plant height	QPh-AxC.ipbb-3A	cfd79A (BS00003801)-BS00050109	49,4-98,5	BS00003801	3A	61.4	61343099-680749623	4.3	10	-1.88	Cadenza																			4.1															3.2	3.9	4.3
11	Plant height	QPh-AxC.ipbb-3B	BS00067242 -BS00022048	62,7-116,4	gwm389	3B	73.7	10202058-38861833	4.9	16	2,48 /-2.14	Avalon/Cadenza																			4	4.9
12	Plant height	QPh-AxC.ipbb-3D	BS00010258- BS00037276	47,4-88,4	BS00117841	3D	72.5	552953735-588315426	4.8	13	2.43	Avalon
13	Plant height	QPh-AxC.ipbb-4D	BS00099053- BS99999962 (BS00081724)	19,9-65,1	RhtMrkD1	4D	54.4	3612555-455343893	21.5	48	-4.27	Cadenza																													14.3	10.9	7.9	13.4	6.9	10.5	11.9	14.4	5.5
14	Plant height	QPh-AxC.ipbb-5A.1	BS00021708 -BS00109299	8,3-40,4	BS00058591	5A	23.1	30410831-485373904	3.8	13	-2.25	Cadenza		3.6
15	Plant height	QPh-AxC.ipbb-5A.2	BS00000648 (BS00066143)-BS00077858 (	50,5-81,5	BS00022457	5A	67.1	533072078-559505885	3.4	16	2.29	Avalon											3.4																						5.4
16	Plant height	QPh-AxC.ipbb-5A.3	gwm126 (BS00055102)-gwm291b (BS00106955)	135,2-183,7	BS00021703	5A	147.8	671551553- 706429491	4.8	15	3,24/-3,5	Avalon/Cadenza										4.4						4.8
17	Plant height	QPh-AxC.ipbb-5B	BS00001817 (BS00111144)--BS00030790	65,2-133,2	BS00003705	5B	87.2	568781660-580840106	4.9	13	-4.11	Cadenza																																		4.9	3.4	4.1
18	Plant height	QPh-AxC.ipbb-6B	BS00023066-BS00075667 (BS00110651)	111,1-136,0	BS00011603	6B	123.4	710149821-718232019	4.4	16	-5.14	Cadenza																								4.4		3.7	4.5
19	Spike length	Qsl-AxC.ipbb-1B	gwm33A - BS00099829	7,2-47,1	BS00011641	1B	33.8	1523241-59601326	3.9	13	0,3/-0,38	Avalon/Cadenza																							3.9							3.6
20	Spike length	Qsl-AxC.ipbb-2A	BS00003845 - BS00094817	93,4-107,3	gwm359	2A	101.5	18234287-31086357	4.5	17	0,39/-0,38	Avalon/Cadenza												4.5																							3.9
21	Spike length	Qsl-AxC.ipbb-2D	gwm132 (BS00035934)- BS00147940 (BS00022210 )	24,1-51,0	BS00035934	2D	30	26774531-68733980	15.7	53	0,27/-0,81	Avalon/Cadenza											3.4																		15.7	6.6	3	10.8			5.3		6.1
22	Spike length	Qsl-AxC.ipbb-2D	gwm539 (BS00040318)-gwm102RG (BS00014219)	86,9-193,3	BS00140904	2D	97.5	450999021-70951376	3.6	16	-0.54	Cadenza																			3.3															3.6
23	Spike length	Qsl-AxC.ipbb-3D	BS00139500- BS00021919	40,2-98,2	s02TCAC	3D	63.7	524870429-596923394	4.2	13	0.74	Avalon									3.6			3.1									4
24	Spike length	Qsl-AxC.ipbb-4A	BS00021957 - BS00022932 (BS00023219)	104,7-121,6	BS00000346	4A	111.7	693278272-715108234	3.9	12	0.22	Avalon													3.9
25	Spike length	Qsl-AxC.ipbb-5A.1	BS00011873 (BS00063817) - BS00029413	35,3-63,5	BS00009531	5A	43.6	473316464-548626258	4.4	17	0,23/-0,79	Avalon/Cadenza			3.1																												4.4
26	Spike length	Qsl-AxC.ipbb-5A.2	BS00018510 -BS00022200	91,6--123,7	BS00041063	5A	98.4	585430959-659457537	4.5	15	0,85/-0,26	Avalon/Cadenza				3.4																										4.5
27	Spike length	Qsl-AxC.ipbb-5A.3	BS00020605 - eAACmCCC405(BS00106955)	159,5-177,0	eAACmCCC320	5A	170.4	689609431-706429491	4.3	16	0,5/-0,24	Avalon/Cadenza			3.1																																	4.3
28	Spike length	Qsl-AxC.ipbb-5B	BS00009789 (BS00049659) - BS00090791	86,3-122,4	wPt-1250	5B	96.6	421275862-551805235	4.5	13	-0.38	Cadenza		4.5																															3.2
29	Spike length	Qsl-AxC.ipbb-6A	BS00001037 - BS00073872	64,1-101,2	BS00022992	6A	71.6	51409554-531522308	3.6	11	0,67/-0,5	Avalon/Cadenza									3.6												3.1
30	Spike length	Qsl-AxC.ipbb-7A	bArc108 (BS00022757)- eACTmCGG120 (BS00093156)	116,5-121,1	bArc49A	7A	119.4	515199355-634962318	3.7	13	0.33	Avalon																		3.7									3.5
31	productive tillerring	QPt-AxC.ipbb-1A	BS00062579 - BS00064197	39,2-55,4	BS00009885	1A	48.2	21760110 -48692389	5.1	17	-0.18	Cadenza				5.1				4.5
32	productive tillerring	QPt-AxC.ipbb-1D	BS00022188 - BS00023957	75,2-125,0	gdm111	1D	96	462203545-556487416	9	47	0,41/-0,27	Avalon/Cadenza				9																																3.9
33	productive tillerring	QPt-AxC.ipbb-2B	BS00041323 - BS00090234	79,0-87,2	wPt-8569	2B	85.2	180543407-680409075	6	23	0,51/-0,23	Avalon/Cadenza					6					3.2									5.2						3	3
34	productive tillerring	QPt-AxC.ipbb-2D	BS00022210 - wmc18 (BS00065456)	67,2-78,9	BS00000002	2D	69.6	68733980-123100805	25.3	66	-0.38	Cadenza																			25.3										3.5
35	productive tillerring	QPt-AxC.ipbb-3D.1	cfd4 (BS00149712)- BS00139500	22,0-40,4	BS00160205	3D	33.4	64767582-524870429	4.3	17	0,10/-0,32	Avalon/Cadenza		4.1				4.3									4.1
36	productive tillerring	QPt-AxC.ipbb-3D.2	BS00010258 - BS00117841 (BS00098058)	47,5-72,2	s02TCAC	3D	64.3	552953735-574238844	6.3	18	0.32	Avalon		6.3				4.2
37	productive tillerring	QPt-AxC.ipbb-3D.3	cfd9 (BS00037276) - BS00097485	91,8-115,0	BS00021850	3D	98.5	588315426-613706986	5.3	17	-0.32	Cadenza		3.6				5.3
38	productive tillerring	QPt-AxC.ipbb-4B	BS00040517 - BS00023204	98,2-109,3	BS00023204	4B	109.3	656816117-656163152	4.8	17	-0.29	Cadenza				3.1																															4.4		3.3
39	productive tillerring	QPt-AxC.ipbb-5A	BS00022128 - BS00022198	98,1-105,7	BS00022128	5A	100.2	613011972-615863922	23.9	38	-0.29	Cadenza																			23.9																	3.3
40	productive tillerring	QPt-AxC.ipbb-5D	BS00000020 - gwm190	4,3-16,3	pinb-D1c	5D	6	3609859-8746800	6.6	22	0,14/-0,15	Avalon/Cadenza												3.1					6.6
41	productive tillerring	QPt-AxC.ipbb-7A	BS00078902 - BS00009797	191,8-212,8	BS00002510	7A	206.6	708246600-724085134	6.5	19	-0.3	Cadenza		3.4				6.5				5.4			3
42	number of kernels per spike	QNks-AxC.ipbb-1A	wPt-9752 (BS00001635) - BS00022070	16,3-31,2	BS00022271	1A	25.4	10067369-14046238	4.2	10	0.96	Avalon				4.7							3.1	4.9
43	number of kernels per spike	QNks-AxC.ipbb-2B	BS00022002 ( BS00022091)- wPt-9736 (BS00067413)	82,1-93,5	BS00011229	2B	84.2	641877699-654510653	5.1	13	-3.83	Cadenza				3	4.5			3.1																									3.9
44	number of kernels per spike	QNks-AxC.ipbb-2D.1	cos2Q (BS00003791)- gwm261 (BS00165526)	11,8-20,6	cfd36 cos2P	2D	13.8	13677182-13989187	4	10	-2.19	Cadenza										3.7		3.7			4
45	number of kernels per spike	QNks-AxC.ipbb-2D.2	gwm539 (BS00040318)-gwm102RG (BS00014219)	86,8-107,2	BS00010681	2D	96.5	450999021-70951376	3.8	14	-1.41	Cadenza									3																											3.8
46	number of kernels per spike	QNks-AxC.ipbb-3D	gwm314 (BS00010258) - BS00117841 (BS00098058)	51,5-72,1	BS00022501	3D	66.3	552953735-574238844	3.3	9	1.38	Avalon			3.1				3.3
47	number of kernels per spike	QNks-AxC.ipbb-4B	BS00021984 - BS00049964D46:D50	47,5-62,3	wPt-3991	4B	54.4	35728213-535085299	5.8	17	0,83/-2,43	Avalon/Cadenza									4.4
48	number of kernels per spike	QNks-AxC.ipbb-4D	BS00036421 - BS00023934 (BS99999971)	59,6-94,4	BS00023943	4D	66.4	32347333-455253024	3.8	10	1.12	Avalon										3.4		3.8
49	number of kernels per spike	QNks-AxC.ipbb-5A	BS00000645 - BS00070260	21,6-32,1	gwm186	5A	27.8	448109881-465294775	7.6	22	-1.59	Cadenza							4.2			3.2			7.6
50	number of kernels per spike	QNks-AxC.ipbb-5B	BS00050054 (BS00110326)- BS00009816	195,5-217,6	BS00009621	5B	208.7	658739979-588645321	3.6	9	1.72	Avalon		3.6		3
51	number of kernels per spike	QNks-AxC.ipbb-6A	bArc171 (BS00001132)- BS00021965	79,0-133,9	BS00099290	6A	100.5	388058969-595563998	7.2	22	3,83/-3,15	Avalon/Cadenza			3.4				3.2														7.2	4.8														3.2
52	number of kernels per spike	QNks-AxC.ipbb-7B	BS00079726 (BS00003756) - BS00111247 (BS00059365)	67,2-70,5	BS00003649 BS00009794 BS00010747 BS00011767 BS00021717 BS00059365 BS00111247	7B	69.1	733490728-741395913	3.6	12	2,35/-1,22	Avalon/Cadenza																	3.6												3.2
53	number of kernels per meter	QNkm-AxC.ipbb-1D	gdm111-BS00023957	105,2-125,0	BS00113456	1D	113.5	494063266-556487416	4	16	-8.03	Cadenza																																	3.4			4
54	number of kernels per meter	QNkm-AxC.ipbb-2A	BS00011478-BS00021676 (BS00009362)	184,6-211,9	BS00009959	2A	197	738989334-761248549	3.9	25	-3	Cadenza																			3.6			3.9
55	number of kernels per meter	QNkm-AxC.ipbb-2D.1	cfd36 (BS00003791)-wPt-9997 (BS00011425)	13,4-35,8	gwm132	2D	24.1	13677182-27925883	4	15	-2.98	Cadenza						4				3
56	number of kernels per meter	QNkm-AxC.ipbb-2D.2	BS00009606-gwm102RG (BS00014219)	69,6-106,8	wmc245b	2D	80.3	650956549-70951376	4.3	13	-3.79	Cadenza																																				3.6
57	number of kernels per meter	QNkm-AxC.ipbb-3A	BS00092728-BS00073063	0,0-11,1	BS00003733	3A	1.3	1309010 -12997670	3.6	10	-6.03	Cadenza																																			3.4	3.6
58	number of kernels per meter	QNkm-AxC.ipbb-3B	BS00010572 (BS00022904) -BS00022715	166,7-208,0	BS00030651	3B	182.9	756120911-794813268	4.4	14	-4.69	Cadenza	4.4					4.2
59	number of kernels per meter	QNkm-AxC.ipbb-4A	BS00000346-gwm160	111,4-156,0	BS00022932	4A	121.4	705723286-719260469	3.6	9	-3.59	Cadenza				3.6					3.4				3.3
60	number of kernels per meter	QNkm-AxC.ipbb-4B	BS00068539-BS00010015	98,2-111,0	BS00009333	4B	110.4	653949465 -660466325	4.5	17	-1.81	Cadenza					4.5																		3
61	number of kernels per meter	QNkm-AxC.ipbb-5A	BS00011116-BS00082002 (BS00009658)	10,5-41,1	gwm186	5A	27	414167574-485201230	9.4	28	-4,87/ 3,23	Cadenza/Avalon				5.1				3.9	3.5			5.3	9,4/3,1			3.8			3.3
62	number of kernels per meter	QNkm-AxC.ipbb-6B	BS00107306-BS00078928 (BS00022370)	17,9-38,7	BS00027942	6B	26.8	22818712-182321331	4.1	14	-4.47	Cadenza																								4.1		3.5
63	number of kernels per meter	QNkm-AxC.ipbb-7A	BS00009346-wPt-7236 (BS00094965)	121,0-137,3	BS00034085	7A	133	638166554-669729056	3.9	11	-5.18	Cadenza															3.9
64	thousand kernal/grain weight	QTkw-AxC..ipbb-1D	BS00073257 - BS00022188	61,1-79,3	BS00123738	1D	70.4	435933385-462203545	4.1	13	-1.06	Cadenza									4	4.1
65	thousand kernal/grain weight	QTkw-AxC..ipbb-3B	BS00021978 - wPt-8845 (BS00062859)	181,3-227,4	BS00054850	3B	190.4	763896022-816628413	3.2	12	-1.12	Cadenza																																			3.2
66	thousand kernal/grain weight	QTkw-AxC..ipbb-3D	BS00129989 (BS00148615) - gwm456A (BS00149712)	0,0-22,3	BS00065928	3D	8.9	29165565-64767582	4.1	13	-1.77	Cadenza																				4.1																	3.2
67	thousand kernal/grain weight	QTkw-AxC..ipbb-4D	BS00099053 - BS00036421	21,4-60,6	RhtMrkD1 wMAS000002_Rht-D1	4D	54.7	3612555-32347333	9	26	0,96/-2,1	Avalon/Cadenza															9	6.3	7.6	7.1												4.7	6.6	4.5
68	thousand kernal/grain weight	QTkw-AxC..ipbb-5A	BS00011116 - gwm156A (BS00058591)	0,0-22,4	BS00022110	5A	16.6	414167574-459003112	7.7	25	-0.89	Cadenza																	4.5	3.5											5.6	6.2	6.5	6.6					3.3
69	thousand kernal/grain weight	QTkw-AxC..ipbb-5B	BS00068710 - BS00048204 (BS00011282)	125,2-147,7	BS00061414	5B	132.2	558119994-596438283	5.6	18	1,84/-0,93	Avalon/Cadenza					5.6
70	thousand kernal/grain weight	QTkw-AxC..ipbb-5D	BS00022067 - BS00148826	76,1-104,0	gwm174A	5D	99.2	351397580-434543581	4.4	14	-1.64	Cadenza																				3.1		4.4
71	thousand kernal/grain weight	QTkw-AxC..ipbb-6A	wPt-7127 (BS00085980) - BS00031178	51,3-64,3	BS00022292	6A	57.2	21520673-51409030	7.1	18	1.21	Avalon																													3	5.6	6.8	7.1
72	thousand kernal/grain weight	QTkw-AxC..ipbb-7D	BS00022610 (BS00023150) - wPt-4555	40,2-46,7	wmc150	7D	42.3	555058879	3.4	9	0.54	Avalon													3.4																		3.2
73	yield per square meter	QYM2-AxC.ipbb-1B	BS00023173 - BS00109526	129,9-159,7	BS00012012	1B	138.5	655781604-670783705	3,8	14	76.6	Avalon																								2.9	3.8	3.2
74	yield per square meter	QYM2-AxC.ipbb-1D	BS00073257 - gdm111	61,3-105,0	BS00022188	1D	79.5	435933385-494063266	42	18	69.2	Avalon			3				4.2
75	yield per square meter	QYM2-AxC.ipbb-2D.1	BS00011425 - BS00023211	35,5-72,7	BS00147940	2D	56.2	30149107 -81836821	4.7	17	-10.8	Cadenza																		4.2		4.6	4.7								3.7		3.1	3.7
76	yield per square meter	QYM2-AxC.ipbb-2D.2	gwm539 (BS00040318) -BS00136847	87,2-192,6	wmc453b	2D	130.9	450999021	6.3	38	-78.7	Cadenza					3.1				6.3			3.9																		3.2							3
77	yield per square meter	QYM2-AxC.ipbb-3B	wPt-5769 (BS00097374) -BS00054850	168,8-189,3	BS00030651	3B	182	753668293-775561953	3.9	4	38.3	Avalon																									3.9	3.4
78	yield per square meter	QYM2-AxC.ipbb-4D	BS00021903 (BS00031366) - BS00023934 (BS99999971)	62,9-94,8	BS00023944	4D	69.9	398908263-455253024	4.6	18	-47.2	Cadenza																													4.2	4	4.1	4.6
79	yield per square meter	QYM2-AxC.ipbb-5A.1	BS00009369 - BS00097986	89,4-91,6	BS00010757	5A	90.9	572350283-582961392	11.9	54	615	Avalon			11.9	4.7							4.7													4.4
80	yield per square meter	QYM2-AxC.ipbb-5A.2	eAACmCCC405(BS00106955) - gwm595b	175,6-202,6	gwm291b	5A	184.3	706429491-680066867	5.4	18	10.32	Avalon																			5.4			5.2												3.4
81	yield per square meter	QYM2-AxC.ipbb-5D	BS00040930 - gwm358A	33,4-71,2	gwm293A	5D	46	40183784-120614528	3.6	10	7.52	Avalon																			3.1		3.6	2.8
82	yield per square meter	QYM2-AxC.ipbb-6A	BS00023192 - wPt-8833 (BS00009782)	30,2-54,2	eACTmCGG285	6A	46.9	13806421-31354988	4.7	15	11.1	Avalon																				4.6	4.7
83	yield per square meter	QYM2-AxC.ipbb-7B	gwm577 (BS00035234) -BS00083352	57,2-64,7	bArc32	7B	62.5	711362280-730115050	3.6	9	6,85/-7,84	Avalon/Cadenza															3.6					3.1
[truncated: 4 more columns]
