# Supplementary material for: QTL mapping of agronomic traits in wheat using the UK Avalon × Cadenza reference mapping population grown in Kazakhstan
Source: PeerJ. 2021 Feb 18;9:e10733. doi: 10.7717/peerj.10733 (PMC7897413; doi:10.7717/peerj.10733)
Supplement: Supplemental Information 3 — The grouping of positive QTLs for NKS with average yield per square meter (YM2) in KB, KA, and KO experimental sites in Northern, Central, and Southern Kazakhstan, respectively. Average YM2 is calculated over three studied years (2013–2015). [file peerj-09-10733-s003.xlsx]

## Sheet: Table S3
Title. A comparative effect of groups with different number of positive quantitative trait loci (QTL) for the number of kernels per spike on the performance of yield (YM2) in three regions of Kazakhstan.
Legend. The grouping of positive QTLs for NKS with average yield per square meter (YM2) in KB, KA, and KO experimental sites in Northern, Central, and Southern Kazakhstan, respectively. Average YM2 is calculated over three studied years (2013-2015).
QTL	QNks-AxC.ipbb-1A	QNks-AxC.ipbb-2B	QNks-AxC.ipbb-2D.1	QNks-AxC.ipbb-2D.2	QNks-AxC.ipbb-3D	QNks-AxC.ipbb-4B	QNks-AxC.ipbb-4D	QNks-AxC.ipbb-5A	QNks-AxC.ipbb-5B	QNks-AxC.ipbb-6A	Number of QTLs with favorable alleles	Yield per square meter (g)		QTL	QNks-AxC.ipbb-2D.1	QNks-AxC.ipbb-6A	QNks-AxC.ipbb-7B	Number of QTLs with favorable alleles	Yield per square meter (g)		QTL	QNks-AxC.ipbb-2B	QNks-AxC.ipbb-2D.2	QNks-AxC.ipbb-4B	QNks-AxC.ipbb-6A	QNks-AxC.ipbb-7B	Number of QTLs with favorable alleles	Yield per square meter (g)
SNP	BS00022271	BS00011229	cfd36	BS00010681	BS00022501	wPt-5334	BS00023943	gwm186	BS00023067	BS00099290	KB	KB		SNP	cfd36	BS00099290	BS00003649	KA	KA		SNP	BS00011229	BS00010681	wPt-5334	BS00099290	BS00003649	KO	KO		Distribution and sigificance of positive QTLs for NKS using average yield per square meter (YM2) in three regions of Kazakhstan over three years (2013-2015)
DHL	25.1	84	13.1	96.6	66.8	54	66.9	27.7	208.3	100.1		Average		DHL	13.1	100.1	70.5		Average		DHL	84	96.6	54	100.1	70.5		Average
АхС - 002	A	B	B	A	A	B	A	B	A	B	9	329.968		АхС-006	B	A	B	3	147.544		АхС - 071	B	B	A	B	A	5	488.082		Region	Groups	Number of positive QTLs	Number of samples	YM2	SE		t-test for studied groups	KB	KA	KO
АхС - 041	A	B	B	B	A	B	B	B	A	A	8	529.239		АхС-023	B	A	B	3	274.539		АхС - 042	B	A	A	B	A	4	425.738		KB	A	9-6	19	463.764	29.19		A/B	0.0525607	0.336259	0.262058
АхС - 087	A	B	-	B	A	B	A	B	B	B	8	463.701		АхС-041	B	A	B	3	192.869		АхС - 073	A	B	A	B	A	4	516.632			B	5-4	41	403.396	15.79		A/C	0.00552357	0.0395806	0.0734185
АхС - 023	A	B	B	B	A	B	B	B	B	A	7	321.77		АхС-062	B	A	B	3	184.784		АхС - 074	B	A	A	B	A	4	414.323			C	3-1	41	372.1	16.92		B/C	0.18031	0.377334	0.316062
АхС - 027	A	B	A	B	B	B	A	B	B	B	7	587.411		АхС-070	B	A	B	3	209.139		АхС - 079	B	A	A	B	A	4	486.482		KA	A	3	8	178.694	17.37
АхС - 042	A	B	B	A	A	A	A	B	B	B	7	433.893		АхС-098	B	A	B	3	120.79		АхС - 087	B	B	B	B	A	4	338.491			B	2	30	151.473	13.58
АхС - 071	A	B	B	B	A	A	B	B	B	B	7	690.253		АхС-125	B	A	B	3	132.975		АхС - 101	A	B	A	B	A	4	409.963			C	1--0	63	139.98	6.19
АхС - 140	A	A	B	B	A	B	A	-	A	A	7	476.4		АхС-129	B	A	B	3	166.911		АхС - 150	B	B	-	B	A	4	546.903		KO	A	5--4	10	456.604	19.49
АхС - 158	A	B	B	B	A	A	A	-	B	B	7	371.99		АхС-001	A	A	B	2	178.268		АхС - 152	A	B	A	B	A	4	443.713			B	3--2	65	433.489	7.44
АхС - 022	-	B	A	B	A	B	A	B	B	-	6	448.237		АхС-007	B	A	-	2	105.015		АхС - 158	B	B	A	B	B	4	495.717			C	1--0	26	420.083	9.74
АхС - 024	B	A	B	B	A	A	A	A	A	B	6	465.508		АхС-008	B	B	B	2	108.236		АхС - 002	B	A	B	B	A	3	340.936
АхС - 055	A	A	B	-	A	A	B	B	A	B	6	678.851		АхС-024	B	B	B	2	167.438		АхС - 008	A	B	A	B	B	3	440.683
АхС - 073	A	A	B	B	A	A	B	B	B	B	6	340.872		АхС-046	B	A	-	2	329.748		АхС - 019	B	A	B	B	A	3	359.185
АхС - 081	A	B	A	A	B	B	B	B	A	B	6	488.359		АхС-052	A	A	B	2	450.012		АхС - 021	A	A	A	B	A	3	326.896
АхС - 084	A	B	B	A	B	B	B	A	A	B	6	348.703		АхС-084	B	B	B	2	142.776		АхС - 022	B	B	B	-	A	3	361.182
АхС - 134	A	B	A	B	B	B	A	-	A	A	6	292.285		АхС-093	A	A	B	2	129.42		АхС - 024	A	B	A	B	B	3	351.043
АхС - 150	A	B	B	B	A	-	B	-	B	B	6	360.901		АхС-107	B	B	B	2	201.28		АхС - 027	B	B	B	B	B	3	341.567
АхС - 168	B	-	B	-	A	B	A	-	A	B	6	479.979		АхС-114	A	A	B	2	237.611		АхС - 053	A	A	A	B	A	3	409.249
АхС - 193	A	A	A	A	A	B	A	-	A	B	6	703.203		АхС-115	-	A	B	2	151.866		АхС - 054	B	A	B	B	A	3	501.034
АхС - 007	-	B	B	B	-	B	B	B	-	A	5	542.1		АхС-116	B	B	B	2	169.977		АхС - 055	A	-	A	B	A	3	488.971
АхС - 008	A	A	B	B	-	A	A	A	B	B	5	328.601		АхС-119	B	B	B	2	162.216		АхС - 070	B	B	A	A	B	3	363.651
АхС - 019	A	B	B	A	B	B	B	A	B	B	5	322.981		АхС-130	B	B	B	2	139.041		АхС - 081	B	A	B	B	A	3	384.959
АхС - 021	B	A	B	A	A	A	A	B	B	B	5	393.319		АхС-133	-	A	B	2	116.061		АхС - 088	A	A	A	B	A	3	401.166
АхС - 052	B	B	A	B	A	B	B	B	B	A	5	558.825		АхС-134	A	A	B	2	155.636		АхС - 099	A	B	A	A	A	3	421.227
АхС - 062	B	A	B	B	A	A	B	B	A	A	5	540.375		АхС-137	A	A	B	2	104.128		АхС - 104	B	A	A	A	A	3	408.493
АхС - 070	B	B	B	B	B	A	A	B	B	A	5	362.612		АхС-139	B	A	A	2	103.064		АхС - 107	B	A	A	B	B	3	507.379
АхС - 074	-	B	A	A	B	A	A	B	A	B	5	484.199		АхС-140	B	A	A	2	92.0622		АхС - 108	B	A	A	A	A	3	498.988
АхС - 079	-	B	B	A	A	A	B	B	B	B	5	305.916		АхС-143	B	B	B	2	128.992		АхС - 109	B	A	A	B	B	3	421.675
АхС - 098	A	B	B	A	A	B	B	A	B	A	5	493.295		АхС-145	A	A	B	2	134.17		АхС - 120	B	A	A	A	A	3	434.628
АхС - 101	A	A	A	B	B	A	A	-	A	B	5	398.42		АхС-148	B	A	A	2	115.096		АхС - 135	B	A	A	-	A	3	473.168
АхС - 138	B	A	B	B	B	B	A	-	B	B	5	387.414		АхС-158	B	B	B	2	104.252		АхС - 138	A	B	B	B	A	3	520.467
АхС - 143	B	A	B	B	A	A	A	-	B	B	5	502.893		АхС-163	-	A	B	2	138.77		АхС - 139	B	A	A	A	A	3	512.706
АхС - 148	B	B	B	B	A	-	B	-	A	A	5	478.142		АхС-164	B	A	A	2	99.3152		АхС - 143	A	B	A	B	B	3	443.719
АхС - 152	B	A	B	B	B	A	A	-	A	B	5	344.466		АхС-165	B	A	-	2	122.644		АхС - 148	B	B	-	A	A	3	511.366
АхС - 156	A	B	-	A	A	-	B	-	A	B	5	422.939		АхС-166	A	A	B	2	109.682		АхС - 194	B	B	B	B	B	3	496.3
АхС - 194	B	B	B	B	B	B	B	-	B	B	5	441.559		АхС-172	B	-	B	2	127.804		АхС - 195	B	B	B	A	A	3	502.011
АхС - 195	B	B	B	B	A	B	B	-	B	A	5	312.357		АхС-186	B	A	A	2	98.6227		АхС - 007	B	B	B	A	-	2	472.013
АхС - 006	-	B	B	A	-	B	A	A	B	A	4	595.061		АхС-194	B	B	B	2	120.977		АхС - 016	A	A	-	B	A	2	390.136
АхС - 017	B	B	A	A	B	B	A	A	A	A	4	471.512		АхС-002	B	B	A	1	132.308		АхС - 017	B	A	B	A	A	2	397.147
АхС - 018	B	B	A	A	A	B	B	B	B	A	4	286.632		АхС-017	A	A	A	1	127.485		АхС - 018	B	A	B	A	A	2	440.641
АхС - 043	A	A	B	B	B	B	-	A	-	-	4	587.036		АхС-018	A	A	A	1	107.468		АхС - 023	B	B	B	A	B	2	426.006
АхС - 044	B	-	B	-	A	A	B	B	B	B	4	465.562		АхС-019	B	B	A	1	133.794		АхС - 041	B	B	B	A	B	2	492.795
АхС - 046	B	A	B	-	A	A	A	B	B	A	4	441.959		АхС-021	B	B	A	1	142.667		АхС - 043	A	B	B	-	A	2	415.637
АхС - 054	B	B	B	A	B	B	B	A	-	B	4	454.934		АхС-027	A	B	B	1	155.471		АхС - 044	-	-	A	B	-	2	362.255
АхС - 080	A	A	A	A	B	A	A	B	A	A	4	582.752		АхС-042	B	B	A	1	153.317		АхС - 052	B	B	B	A	B	2	508.564
АхС - 093	A	A	A	B	A	A	B	B	-	A	4	287.557		АхС-043	B	-	A	1	211.695		АхС - 058	-	-	A	B	-	2	465.502
АхС - 107	A	B	B	A	B	A	B	-	B	B	4	406.606		АхС-044	B	B	-	1	243.015		АхС - 062	A	B	A	A	B	2	436.088
АхС - 109	B	B	A	A	B	A	A	-	A	B	4	422.98		АхС-054	B	B	A	1	239.037		АхС - 080	A	A	A	A	A	2	416.253
АхС - 114	B	B	A	A	-	B	A	-	A	A	4	460.405		АхС-055	B	B	A	1	226.392		АхС - 084	B	A	B	B	B	2	374.473
АхС - 115	A	B	-	B	-	B	B	-	B	A	4	375.731		АхС-065	A	A	A	1	307.09		АхС - 092	-	-	A	B	-	2	456.481
АхС - 116	B	A	B	A	A	A	A	-	B	B	4	469.802		АхС-071	B	B	A	1	163.102		АхС - 093	A	B	A	A	B	2	455.537
АхС - 117	A	-	A	-	A	A	B	-	A	B	4	277.313		АхС-073	B	B	A	1	201.957		АхС - 102	B	A	B	B	B	2	445.056
АхС - 126	A	A	A	A	A	B	B	-	A	A	4	250.187		АхС-079	B	B	A	1	133.193		АхС - 103	A	A	A	A	A	2	241.261
АхС - 141	B	B	A	A	A	B	B	-	B	B	4	317.358		АхС-080	A	A	A	1	121.849		АхС - 105	A	A	A	A	A	2	438.826
АхС - 145	B	B	A	A	A	B	B	-	A	A	4	368.917		АхС-085	-	B	B	1	108.25		АхС - 115	B	B	B	A	B	2	525.336
АхС - 146	B	-	A	-	B	B	A	-	A	B	4	254.797		АхС-088	B	B	A	1	96.4695		АхС - 116	A	A	A	B	B	2	310.633
АхС - 166	B	A	A	B	B	B	A	-	A	A	4	290.632		АхС-092	B	B	-	1	91.3694		АхС - 117	-	-	A	B	-	2	489.483
АхС - 167	A	-	A	-	A	A	A	-	B	B	4	320.227		АхС-096	A	-	B	1	184.928		АхС - 122	A	A	A	B	B	2	406.551
АхС - 176	B	A	A	A	B	B	A	-	A	B	4	286.132		АхС-099	A	A	A	1	98.2563		АхС - 125	A	B	A	A	B	2	453.085
АхС - 186	B	A	B	A	A	B	A	-	B	A	4	244.712		АхС-102	A	B	B	1	100.243		АхС - 130	A	A	A	B	B	2	428.189
АхС - 016	B	A	A	A	B	-	B	B	A	B	3	472.107		АхС-103	A	A	A	1	134.856		АхС - 132	A	A	A	B	B	2	422.041
АхС - 053	A	A	A	A	B	A	B	B	B	B	3	427.318		АхС-104	A	A	A	1	154.605		АхС - 134	B	B	B	A	B	2	401.015
АхС - 058	B	-	A	-	B	A	B	B	A	B	3	332.93		АхС-105	A	A	A	1	164.452		АхС - 140	A	B	B	A	A	2	387.802
АхС - 088	B	A	B	A	B	A	A	-	-	B	3	345.299		АхС-108	A	A	A	1	215.64		АхС - 141	B	A	B	B	B	2	431.889
АхС - 092	-	-	B	-	-	A	B	A	A	B	3	417.563		АхС-109	A	B	B	1	150.297		АхС - 147	A	A	A	A	A	2	451.698
АхС - 099	-	A	A	B	A	A	B	-	A	A	3	425.257		АхС-120	A	A	A	1	112.212		АхС - 156	B	A	-	B	B	2	564.138
АхС - 102	B	B	A	A	-	B	B	-	B	B	3	331.518		АхС-122	A	B	B	1	93.6715		АхС - 163	B	B	-	A	B	2	541.544
АхС - 108	A	B	A	A	B	A	B	-	A	A	3	381.69		АхС-126	A	A	A	1	152.359		АхС - 164	A	A	A	A	A	2	481.863
АхС - 119	B	A	B	A	B	B	B	-	B	B	3	366.831		АхС-132	A	B	B	1	107.23		АхС - 167	-	-	A	B	-	2	395.924
АхС - 125	B	A	B	B	B	A	A	-	-	A	3	406.925		АхС-138	B	B	A	1	95.8049		АхС - 170	A	A	A	A	A	2	426.475
АхС - 130	B	A	B	A	-	A	A	-	B	B	3	404.039		АхС-141	A	B	B	1	123.905		АхС - 173	-	-	A	B	-	2	455.472
АхС - 132	B	A	A	A	A	A	B	-	A	B	3	313.374		АхС-147	A	A	A	1	113.019		АхС - 191	B	A	B	-	A	2	426.384
АхС - 137	B	B	A	A	B	B	B	-	A	A	3	439.522		АхС-150	B	B	A	1	85.7712		АхС - 192	A	A	-	B	A	2	433.338
АхС - 147	A	A	A	A	A	A	A	-	B	A	3	497.686		АхС-152	B	B	A	1	122.265		АхС - 193	A	A	B	B	A	2	436.694
АхС - 163	B	B	-	B	B	-	A	-	B	A	3	274.362		АхС-156	-	B	B	1	117.656		АхС - 200	-	B	B	-	A	2	449.884
АхС - 164	A	A	B	A	B	A	A	-	B	A	3	292.127		АхС-162	-	A	A	1	123.935		АхС - 001	A	B	-	A	B	1	515.766
АхС - 172	-	A	B	B	-	B	-	-	-	-	3	285.259		АхС-168	B	B	-	1	86.0212		АхС - 006	B	A	B	A	B	1	370.003
АхС - 188	A	A	A	A	A	-	B	-	B	B	3	328.66		АхС-170	A	A	A	1	92.2623		АхС - 046	A	-	A	A	-	1	487.235
АхС - 191	B	B	B	A	B	B	B	-	B	-	3	290.016		АхС-176	A	B	B	1	120.073		АхС - 065	A	A	B	A	A	1	368.325
АхС - 192	B	A	A	A	A	-	-	-	A	B	3	305.964		АхС-188	A	B	B	1	126.356		АхС - 085	A	A	-	B	B	1	352.924
АхС - 200	-	-	B	B	-	B	-	-	-	-	3	847.151		АхС-191	B	-	A	1	105.945		АхС - 096	A	A	A	-	B	1	333.048
АхС - 203	-	A	B	B	-	B	-	-	-	-	3	461.456		АхС-195	B	A	A	1	120.368		АхС - 098	B	A	B	A	B	1	443.263
АхС - 065	B	A	A	A	B	B	B	A	A	A	2	401.572		АхС-196	A	A	A	1	120.178		АхС - 114	B	A	B	A	B	1	470.03
АхС - 085	B	A	-	A	A	-	B	-	B	B	2	428.931		АхС-200	B	-	A	1	174.289		АхС - 119	A	A	B	B	B	1	372.196
АхС - 096	B	A	A	A	A	A	B	A	A	-	2	274.451		АхС-203	B	-	B	1	130.876		АхС - 126	A	A	B	A	A	1	419.542
АхС - 104	B	B	A	A	B	A	A	-	B	A	2	400.022		АхС-205	B	-	B	1	61.5151		АхС - 133	A	A	A	A	B	1	460.199
АхС - 129	B	A	B	A	B	B	B	-	B	A	2	343.729		АхС-016	A	B	A	0	145.355		АхС - 137	B	A	B	A	B	1	439.681
АхС - 133	A	A	-	A	B	A	B	-	A	A	2	344.112		АхС-022	A	-	A	0	224.379		АхС - 145	B	A	B	A	B	1	414.901
АхС - 135	A	B	-	A	-	A	-	-	B	-	2	535.103		АхС-053	A	B	A	0	282.626		АхС - 146	-	-	B	B	-	1	460.851
АхС - 139	B	B	B	A	B	A	B	-	B	A	2	297.456		АхС-058	A	B	-	0	163.606		АхС - 162	A	A	-	A	A	1	448.382
АхС - 170	B	A	A	A	A	A	A	-	B	A	2	291.362		АхС-074	A	B	A	0	174.369		АхС - 166	A	B	B	A	B	1	432.837
АхС - 173	A	-	A	-	B	A	B	-	B	B	2	209.92		АхС-081	A	B	A	0	117.796		АхС - 168	-	-	B	B	-	1	410.445
АхС - 196	B	A	A	-	B	B	A	-	B	A	2	408.503		АхС-087	-	B	A	0	123.954		АхС - 172	A	B	B	-	B	1	438.089
АхС - 205	-	A	B	A	-	B	-	-	-	-	2	444.281		АхС-101	A	B	A	0	136.72		АхС - 176	A	A	B	B	B	1	468.418
АхС - 001	B	A	A	B	B	-	B	A	B	A	1	333.753		АхС-117	A	B	-	0	123.583		АхС - 186	A	A	B	A	A	1	384.292
АхС - 103	B	A	A	A	B	A	A	-	B	A	1	244.476		АхС-135	-	-	A	0	135.38		АхС - 188	A	A	-	B	B	1	448.433
АхС - 105	B	A	A	A	A	A	B	-	-	A	1	310.235		АхС-146	A	B	-	0	110.856		АхС - 196	A	-	B	A	A	1	398.689
АхС - 120	B	B	A	A	B	A	B	-	B	A	1	381.874		АхС-167	A	B	-	0	121.495		АхС - 203	A	B	B	-	B	1	440.549
АхС - 122	B	A	A	A	B	A	B	-	B	B	1	320.236		АхС-173	A	B	-	0	81.0836		АхС - 129	A	A	B	A	B	0	298.251
АхС - 162	B	A	-	A	B	-	B	-	A	A	1	450.885		АхС-192	A	B	A	0	106.348		АхС - 165	-	-	-	A	-	0	434.986
АхС - 165	B	-	B	-	-	-	B	-	B	A	1	188.142		АхС-193	A	B	A	0	86.2553		АхС - 205	A	A	B	-	B	0	410.818
																									BS00099290	BS00003649
																									6A	7B
																									100.1	70.5
																									A	B
																									B	A
																									A	B
																									A	-
																									B	B
																									B	A
																									A	A
																									A	A
																									B	A
																									B	A
																									-	A
																									A	B
																									B	B
																									B	B
																									A	B
																									B	A
																									-	A
																									B	-
																									A	-
																									A	B
																									B	A
																									B	A
																									B	A
																									B	-
																									A	B
																									A	A
																									A	B
																									B	A
																									B	A
																									B	A
																									B	A
																									A	A
																									B	A
																									B	B
																									B	B
																									B	A
																									B	A
																									B	-
																									A	B
																									-	B
																									A	B
																									A	A
																									B	A
																									B	B
																									A	A
																									A	A
																									A	A
																									B	B
																									A	A
																									B	B
																									A	B
																									A	B
																									B	B
																									B	-
																									B	B
																									A	A
																									B	B
																									A	B
																									A	A
																									A	B
																									B	B
																									B	B
																									A	B
																									A	B
																									-	A
																									A	B
																									B	A
																									A	A
																									A	A
																									B	B
																									B	B
																									A	B
																									B	-
																									A	A
																									A	A
																									B	A
																									B	A
																									B	B
																									B	B
																									A	A
																									A	B
																									A	A
																									A	-
																									A	B
																									B	-
																									B	-
																									A	A
																									-	B
																									B	-
																									B	B
																									A	A
																									B	B
																									-	A
																									B	A
																									B	A
																									B	B
																									A	A
																									A	A
																									-	A
																									-	B
																									-	B
																									BS00099290	BS00003649
																									6A	7B
																									100.1	70.5
																									A	B
																									B	A
																									A	B
																									A	-
																									B	B
																									B	A
																									A	A
																									A	A
																									B	A
																									B	A
																									-	A
																									A	B
																									B	B
																									B	B
																									A	B
																									B	A
																									-	A
																									B	-
																									A	-
																									A	B
																									B	A
																									B	A
																									B	A
																									B	-
																									A	B
																									A	A
																									A	B
																									B	A
																									B	A
																									B	A
																									B	A
																									A	A
																									B	A
																									B	B
																									B	B
																									B	A
																									B	A
																									B	-
																									A	B
																									-	B
																									A	B
																									A	A
																									B	A
																									B	B
																									A	A
																									A	A
																									A	A
																									B	B
																									A	A
																									B	B
																									A	B
																									A	B
																									B	B
																									B	-
																									B	B
																									A	A
																									B	B
																									A	B
																									A	A
																									A	B
																									B	B
																									B	B
																									A	B
																									A	B
																									-	A
																									A	B
																									B	A
																									A	A
																									A	A
																									B	B
																									B	B
																									A	B
																									B	-
																									A	A
																									A	A
																									B	A
																									B	A
																									B	B
																									B	B
																									A	A
																									A	B
																									A	A
																									A	-
																									A	B
																									B	-
																									B	-
																									A	A
																									-	B
																									B	-
																									B	B
																									A	A
																									B	B
																									-	A
																									B	A
																									B	A
																									B	B
																									A	A
																									A	A
																									-	A
																									-	B
																									-	B
																									BS00099290	BS00003649
																									6A	7B
																									100.1	70.5
																									A	B
																									B	A
																									A	B
																									A	-
																									B	B
																									B	A
																									A	A
																									A	A
																									B	A
																									B	A
																									-	A
																									A	B
																									B	B
																									B	B
																									A	B
																									B	A
																									-	A
																									B	-
																									A	-
																									A	B
																									B	A
																									B	A
																									B	A
																									B	-
																									A	B
																									A	A
																									A	B
																									B	A
																									B	A
																									B	A
																									B	A
																									A	A
																									B	A
																									B	B
																									B	B
																									B	A
																									B	A
																									B	-
																									A	B
																									-	B
																									A	B
																									A	A
																									B	A
																									B	B
																									A	A
																									A	A
																									A	A
																									B	B
																									A	A
																									B	B
																									A	B
																									A	B
																									B	B
																									B	-
																									B	B
																									A	A
																									B	B
																									A	B
																									A	A
																									A	B
																									B	B
																									B	B
																									A	B
																									A	B
																									-	A
																									A	B
																									B	A
																									A	A
																									A	A
																									B	B
																									B	B
																									A	B
																									B	-
																									A	A
																									A	A
																									B	A
																									B	A
																									B	B
																									B	B
																									A	A
																									A	B
																									A	A
																									A	-
																									A	B
																									B	-
																									B	-
																									A	A
																									-	B
																									B	-
																									B	B
																									A	A
																									B	B
																									-	A
																									B	A
																									B	A
																									B	B
																									A	A
																									A	A
																									-	A
																									-	B
																									-	B
																									BS00099290	BS00003649
																									6A	7B
																									100.1	70.5
																									A	B
																									B	A
																									A	B
																									A	-
																									B	B
																									B	A
																									A	A
																									A	A
																									B	A
																									B	A
																									-	A
																									A	B
																									B	B
																									B	B
																									A	B
																									B	A
																									-	A
																									B	-
																									A	-
																									A	B
																									B	A
																									B	A
																									B	A
																									B	-
																									A	B
																									A	A
																									A	B
																									B	A
																									B	A
																									B	A
																									B	A
																									A	A
																									B	A
																									B	B
																									B	B
																									B	A
																									B	A
																									B	-
																									A	B
																									-	B
																									A	B
																									A	A
																									B	A
																									B	B
																									A	A
																									A	A
																									A	A
																									B	B
																									A	A
																									B	B
																									A	B
																									A	B
																									B	B
																									B	-
																									B	B
																									A	A
																									B	B
																									A	B
																									A	A
																									A	B
																									B	B
																									B	B
																									A	B
																									A	B
																									-	A
																									A	B
																									B	A
																									A	A
																									A	A
																									B	B
																									B	B
																									A	B
																									B	-
																									A	A
																									A	A
																									B	A
																									B	A
																									B	B
																									B	B
																									A	A
																									A	B
																									A	A
																									A	-
																									A	B
																									B	-
																									B	-
																									A	A
																									-	B
																									B	-
																									B	B
																									A	A
																									B	B
																									-	A
																									B	A
																									B	A
																									B	B
																									A	A
																									A	A
																									-	A
																									-	B
																									-	B
																									BS00099290	BS00003649
																									6A	7B
																									100.1	70.5
																									A	B
																									B	A
																									A	B
																									A	-
																									B	B
																									B	A
																									A	A
																									A	A
																									B	A
																									B	A
																									-	A
																									A	B
																									B	B
																									B	B
																									A	B
																									B	A
																									-	A
																									B	-
																									A	-
																									A	B
																									B	A
																									B	A
																									B	A
																									B	-
																									A	B
																									A	A
																									A	B
																									B	A
																									B	A
																									B	A
																									B	A
																									A	A
																									B	A
																									B	B
																									B	B
																									B	A
																									B	A
																									B	-
																									A	B
																									-	B
																									A	B
																									A	A
																									B	A
																									B	B
																									A	A
																									A	A
																									A	A
																									B	B
																									A	A
																									B	B
																									A	B
																									A	B
																									B	B
																									B	-
																									B	B
																									A	A
																									B	B
																									A	B
																									A	A
																									A	B
																									B	B
																									B	B
																									A	B
																									A	B
																									-	A
																									A	B
																									B	A
																									A	A
																									A	A
																									B	B
																									B	B
																									A	B
																									B	-
																									A	A
																									A	A
																									B	A
																									B	A
																									B	B
																									B	B
																									A	A
																									A	B
																									A	A
																									A	-
																									A	B
																									B	-
																									B	-
																									A	A
																									-	B
																									B	-
																									B	B
																									A	A
																									B	B
																									-	A
																									B	A
																									B	A
																									B	B
																									A	A
																									A	A
																									-	A
																									-	B
																									-	B
																									BS00099290	BS00003649
																									6A	7B
																									100.1	70.5
																									A	B
																									B	A
																									A	B
																									A	-
																									B	B
																									B	A
																									A	A
																									A	A
																									B	A
																									B	A
																									-	A
																									A	B
																									B	B
																									B	B
																									A	B
																									B	A
																									-	A
																									B	-
																									A	-
																									A	B
																									B	A
																									B	A
																									B	A
																									B	-
																									A	B
																									A	A
																									A	B
																									B	A
																									B	A
																									B	A
																									B	A
																									A	A
																									B	A
																									B	B
																									B	B
																									B	A
																									B	A
																									B	-
																									A	B
																									-	B
																									A	B
																									A	A
																									B	A
																									B	B
																									A	A
																									A	A
																									A	A
																									B	B
																									A	A
																									B	B
																									A	B
																									A	B
																									B	B
																									B	-
																									B	B
																									A	A
																									B	B
																									A	B
																									A	A
																									A	B
																									B	B
																									B	B
																									A	B
																									A	B
																									-	A
																									A	B
																									B	A
																									A	A
																									A	A
																									B	B
																									B	B
																									A	B
																									B	-
																									A	A
																									A	A
																									B	A
																									B	A
																									B	B
																									B	B
																									A	A
																									A	B
																									A	A
																									A	-
																									A	B
																									B	-
																									B	-
																									A	A
																									-	B
																									B	-
																									B	B
																									A	A
																									B	B
																									-	A
																									B	A
																									B	A
																									B	B
																									A	A
																									A	A
																									-	A
																									-	B
																									-	B
																									BS00099290	BS00003649
																									6A	7B
																									100.1	70.5
																									A	B
																									B	A
																									A	B
																									A	-
																									B	B
																									B	A
																									A	A
																									A	A
																									B	A
																									B	A
																									-	A
																									A	B
																									B	B
																									B	B
																									A	B
																									B	A
																									-	A
																									B	-
																									A	-
																									A	B
																									B	A
																									B	A
																									B	A
																									B	-
																									A	B
																									A	A
																									A	B
																									B	A
																									B	A
																									B	A
																									B	A
																									A	A
																									B	A
																									B	B
																									B	B
																									B	A
																									B	A
																									B	-
																									A	B
																									-	B
																									A	B
																									A	A
																									B	A
																									B	B
																									A	A
																									A	A
																									A	A
																									B	B
																									A	A
																									B	B
																									A	B
																									A	B
																									B	B
																									B	-
																									B	B
																									A	A
																									B	B
																									A	B
																									A	A
																									A	B
																									B	B
																									B	B
																									A	B
																									A	B
																									-	A
																									A	B
																									B	A
																									A	A
																									A	A
																									B	B
																									B	B
																									A	B
																									B	-
																									A	A
																									A	A
																									B	A
																									B	A
																									B	B
																									B	B
																									A	A
																									A	B
																									A	A
																									A	-
																									A	B
																									B	-
																									B	-
																									A	A
																									-	B
																									B	-
																									B	B
																									A	A
																									B	B
																									-	A
																									B	A
																									B	A
																									B	B
																									A	A
																									A	A
																									-	A
																									-	B
																									-	B
																									BS00099290	BS00003649
																									6A	7B
																									100.1	70.5
																									A	B
																									B	A
																									A	B
																									A	-
																									B	B
																									B	A
																									A	A
																									A	A
																									B	A
																									B	A
																									-	A
																									A	B
																									B	B
																									B	B
																									A	B
																									B	A
																									-	A
																									B	-
																									A	-
																									A	B
																									B	A
																									B	A
																									B	A
																									B	-
																									A	B
																									A	A
																									A	B
																									B	A
																									B	A
																									B	A
																									B	A
																									A	A
																									B	A
																									B	B
																									B	B
																									B	A
																									B	A
																									B	-
																									A	B
																									-	B
																									A	B
																									A	A
																									B	A
																									B	B
																									A	A
																									A	A
																									A	A
																									B	B
																									A	A
																									B	B
																									A	B
																									A	B
																									B	B
																									B	-
																									B	B
																									A	A
																									B	B
																									A	B
																									A	A
																									A	B
																									B	B
																									B	B
																									A	B
																									A	B
																									-	A
																									A	B
																									B	A
																									A	A
																									A	A
																									B	B
																									B	B
																									A	B
																									B	-
																									A	A
																									A	A
																									B	A
																									B	A
																									B	B
																									B	B
																									A	A
																									A	B
																									A	A
																									A	-
																									A	B
																									B	-
																									B	-
																									A	A
																									-	B
																									B	-
																									B	B
																									A	A
																									B	B
																									-	A
																									B	A
																									B	A
																									B	B
																									A	A
																									A	A
																									-	A
																									-	B
																									-	B
																									BS00099290	BS00003649
																									6A	7B
																									100.1	70.5
																									A	B
																									B	A
																									A	B
																									A	-
																									B	B
																									B	A
																									A	A
																									A	A
																									B	A
																									B	A
																									-	A
																									A	B
																									B	B
																									B	B
																									A	B
																									B	A
																									-	A
																									B	-
																									A	-
																									A	B
																									B	A
																									B	A
																									B	A
																									B	-
																									A	B
																									A	A
																									A	B
																									B	A
																									B	A
																									B	A
																									B	A
																									A	A
																									B	A
																									B	B
																									B	B
																									B	A
																									B	A
																									B	-
																									A	B
																									-	B
																									A	B
																									A	A
																									B	A
																									B	B
																									A	A
																									A	A
																									A	A
																									B	B
																									A	A
																									B	B
																									A	B
																									A	B
																									B	B
																									B	-
																									B	B
																									A	A
																									B	B
																									A	B
																									A	A
																									A	B
																									B	B
																									B	B
																									A	B
																									A	B
																									-	A
																									A	B
																									B	A
																									A	A
																									A	A
																									B	B
																									B	B
																									A	B
																									B	-
																									A	A
																									A	A
																									B	A
																									B	A
																									B	B
																									B	B
																									A	A
																									A	B
																									A	A
																									A	-
																									A	B
																									B	-
																									B	-
																									A	A
																									-	B
																									B	-
																									B	B
																									A	A
																									B	B
																									-	A
																									B	A
																									B	A
																									B	B
																									A	A
																									A	A
																									-	A
																									-	B
																									-	B
																									BS00099290	BS00003649
																									6A	7B
																									100.1	70.5
																									A	B
																									B	A
																									A	B
																									A	-
																									B	B
																									B	A
																									A	A
																									A	A
																									B	A
																									B	A
																									-	A
																									A	B
																									B	B
																									B	B
																									A	B
																									B	A
																									-	A
																									B	-
																									A	-
																									A	B
																									B	A
																									B	A
																									B	A
																									B	-
																									A	B
																									A	A
																									A	B
																									B	A
																									B	A
																									B	A
																									B	A
																									A	A
																									B	A
																									B	B
																									B	B
																									B	A
																									B	A
																									B	-
																									A	B
																									-	B
																									A	B
																									A	A
																									B	A
																									B	B
																									A	A
																									A	A
																									A	A
																									B	B
																									A	A
																									B	B
																									A	B
																									A	B
																									B	B
																									B	-
																									B	B
																									A	A
																									B	B
																									A	B
																									A	A
																									A	B
																									B	B
																									B	B
																									A	B
																									A	B
																									-	A
																									A	B
																									B	A
																									A	A
																									A	A
																									B	B
																									B	B
																									A	B
																									B	-
																									A	A
																									A	A
																									B	A
																									B	A
																									B	B
																									B	B
																									A	A
																									A	B
																									A	A
																									A	-
																									A	B
																									B	-
																									B	-
																									A	A
																									-	B
																									B	-
																									B	B
																									A	A
																									B	B
																									-	A
																									B	A
																									B	A
																									B	B
																									A	A
																									A	A
																									-	A
																									-	B
																									-	B
																									BS00099290	BS00003649
																									6A	7B
																									100.1	70.5
																									A	B
																									B	A
																									A	B
																									A	-
																									B	B
																									B	A
																									A	A
																									A	A
																									B	A
																									B	A
																									-	A
																									A	B
																									B	B
																									B	B
																									A	B
																									B	A
																									-	A
																									B	-
																									A	-
																									A	B
																									B	A
																									B	A
																									B	A
																									B	-
																									A	B
																									A	A
																									A	B
																									B	A
																									B	A
																									B	A
																									B	A
																									A	A
																									B	A
																									B	B
																									B	B
																									B	A
																									B	A
																									B	-
																									A	B
																									-	B
																									A	B
																									A	A
																									B	A
																									B	B
																									A	A
																									A	A
																									A	A
																									B	B
																									A	A
																									B	B
																									A	B
																									A	B
																									B	B
																									B	-
																									B	B
																									A	A
																									B	B
																									A	B
																									A	A
																									A	B
																									B	B
																									B	B
																									A	B
																									A	B
																									-	A
																									A	B
																									B	A
																									A	A
																									A	A
																									B	B
																									B	B
																									A	B
																									B	-
																									A	A
																									A	A
																									B	A
																									B	A
																									B	B
																									B	B
																									A	A
																									A	B
																									A	A
																									A	-
																									A	B
																									B	-
																									B	-
																									A	A
																									-	B
																									B	-
																									B	B
																									A	A
																									B	B
																									-	A
																									B	A
																									B	A
																									B	B
																									A	A
																									A	A
																									-	A
																									-	B
																									-	B
																									BS00099290	BS00003649
																									6A	7B
																									100.1	70.5
																									A	B
																									B	A
																									A	B
																									A	-
																									B	B
																									B	A
																									A	A
																									A	A
																									B	A
																									B	A
																									-	A
																									A	B
																									B	B
																									B	B
																									A	B
																									B	A
																									-	A
																									B	-
																									A	-
																									A	B
																									B	A
																									B	A
																									B	A
																									B	-
																									A	B
																									A	A
																									A	B
																									B	A
																									B	A
																									B	A
																									B	A
																									A	A
																									B	A
																									B	B
																									B	B
																									B	A
																									B	A
																									B	-
																									A	B
																									-	B
																									A	B
																									A	A
																									B	A
																									B	B
																									A	A
																									A	A
																									A	A
																									B	B
																									A	A
																									B	B
																									A	B
																									A	B
																									B	B
																									B	-
																									B	B
																									A	A
																									B	B
																									A	B
																									A	A
																									A	B
																									B	B
																									B	B
																									A	B
																									A	B
																									-	A
																									A	B
																									B	A
																									A	A
																									A	A
																									B	B
																									B	B
																									A	B
																									B	-
																									A	A
																									A	A
																									B	A
																									B	A
																									B	B
																									B	B
																									A	A
																									A	B
																									A	A
																									A	-
																									A	B
																									B	-
																									B	-
																									A	A
																									-	B
																									B	-
																									B	B
																									A	A
																									B	B
																									-	A
																									B	A
																									B	A
																									B	B
																									A	A
																									A	A
																									-	A
																									-	B
																									-	B
																									BS00099290	BS00003649
																									6A	7B
																									100.1	70.5
																									A	B
																									B	A
																									A	B
																									A	-
																									B	B
																									B	A
																									A	A
																									A	A
																									B	A
																									B	A
																									-	A
																									A	B
																									B	B
																									B	B
																									A	B
																									B	A
																									-	A
																									B	-
																									A	-
																									A	B
																									B	A
																									B	A
																									B	A
																									B	-
																									A	B
																									A	A
																									A	B
																									B	A
																									B	A
																									B	A
																									B	A
																									A	A
																									B	A
																									B	B
																									B	B
																									B	A
																									B	A
																									B	-
																									A	B
																									-	B
																									A	B
																									A	A
																									B	A
																									B	B
																									A	A
																									A	A
																									A	A
																									B	B
																									A	A
																									B	B
																									A	B
																									A	B
																									B	B
																									B	-
																									B	B
																									A	A
																									B	B
																									A	B
																									A	A
																									A	B
																									B	B
																									B	B
																									A	B
																									A	B
																									-	A
																									A	B
																									B	A
																									A	A
																									A	A
																									B	B
																									B	B
																									A	B
																									B	-
																									A	A
																									A	A
																									B	A
																									B	A
																									B	B
																									B	B
																									A	A
																									A	B
																									A	A
																									A	-
																									A	B
																									B	-
																									B	-
																									A	A
																									-	B
																									B	-
																									B	B
																									A	A
																									B	B
																									-	A
																									B	A
																									B	A
																									B	B
																									A	A
																									A	A
																									-	A
																									-	B
																									-	B
																									BS00099290	BS00003649
																									6A	7B
																									100.1	70.5
																									A	B
																									B	A
																									A	B
																									A	-
																									B	B
																									B	A
																									A	A
																									A	A
																									B	A
																									B	A
																									-	A
																									A	B
																									B	B
																									B	B
																									A	B
																									B	A
																									-	A
																									B	-
																									A	-
																									A	B
																									B	A
																									B	A
																									B	A
																									B	-
																									A	B
																									A	A
																									A	B
																									B	A
																									B	A
																									B	A
																									B	A
																									A	A
																									B	A
																									B	B
																									B	B
																									B	A
																									B	A
																									B	-
																									A	B
																									-	B
																									A	B
																									A	A
																									B	A
																									B	B
																									A	A
																									A	A
																									A	A
																									B	B
																									A	A
																									B	B
																									A	B
																									A	B
																									B	B
																									B	-
																									B	B
																									A	A
																									B	B
																									A	B
																									A	A
																									A	B
																									B	B
																									B	B
																									A	B
																									A	B
																									-	A
																									A	B
																									B	A
																									A	A
																									A	A
																									B	B
																									B	B
																									A	B
																									B	-
																									A	A
																									A	A
																									B	A
																									B	A
																									B	B
																									B	B
																									A	A
																									A	B
																									A	A
																									A	-
																									A	B
																									B	-
																									B	-
																									A	A
																									-	B
																									B	-
																									B	B
																									A	A
																									B	B
																									-	A
																									B	A
																									B	A
																									B	B
																									A	A
																									A	A
																									-	A
																									-	B
																									-	B
																									BS00099290	BS00003649
																									6A	7B
																									100.1	70.5
																									A	B
																									B	A
																									A	B
																									A	-
																									B	B
																									B	A
																									A	A
																									A	A
																									B	A
																									B	A
																									-	A
																									A	B
																									B	B
																									B	B
																									A	B
																									B	A
																									-	A
																									B	-
																									A	-
																									A	B
																									B	A
																									B	A
																									B	A
																									B	-
																									A	B
																									A	A
																									A	B
																									B	A
																									B	A
																									B	A
																									B	A
																									A	A
																									B	A
																									B	B
																									B	B
																									B	A
																									B	A
																									B	-
																									A	B
																									-	B
																									A	B
																									A	A
																									B	A
																									B	B
																									A	A
																									A	A
																									A	A
																									B	B
																									A	A
																									B	B
																									A	B
																									A	B
																									B	B
																									B	-
																									B	B
																									A	A
																									B	B
																									A	B
																									A	A
																									A	B
																									B	B
																									B	B
																									A	B
																									A	B
																									-	A
																									A	B
																									B	A
																									A	A
																									A	A
																									B	B
																									B	B
																									A	B
																									B	-
																									A	A
																									A	A
																									B	A
																									B	A
																									B	B
																									B	B
																									A	A
																									A	B
																									A	A
																									A	-
																									A	B
																									B	-
																									B	-
																									A	A
																									-	B
																									B	-
																									B	B
																									A	A
																									B	B
																									-	A
																									B	A
																									B	A
																									B	B
																									A	A
																									A	A
																									-	A
																									-	B
																									-	B
																									BS00099290	BS00003649
																									6A	7B
																									100.1	70.5
																									A	B
																									B	A
																									A	B
																									A	-
																									B	B
																									B	A
																									A	A
																									A	A
																									B	A
																									B	A
																									-	A
																									A	B
																									B	B
																									B	B
																									A	B
																									B	A
																									-	A
																									B	-
																									A	-
																									A	B
																									B	A
																									B	A
																									B	A
																									B	-
																									A	B
																									A	A
																									A	B
																									B	A
																									B	A
																									B	A
																									B	A
																									A	A
																									B	A
																									B	B
																									B	B
																									B	A
																									B	A
																									B	-
																									A	B
																									-	B
																									A	B
																									A	A
																									B	A
																									B	B
																									A	A
																									A	A
																									A	A
																									B	B
																									A	A
																									B	B
																									A	B
																									A	B
																									B	B
																									B	-
																									B	B
																									A	A
																									B	B
																									A	B
																									A	A
																									A	B
																									B	B
																									B	B
																									A	B
																									A	B
																									-	A
																									A	B
																									B	A
																									A	A
																									A	A
																									B	B
																									B	B
																									A	B
																									B	-
																									A	A
																									A	A
																									B	A
																									B	A
																									B	B
																									B	B
																									A	A
																									A	B
																									A	A
																									A	-
																									A	B
																									B	-
																									B	-
																									A	A
																									-	B
																									B	-
																									B	B
																									A	A
																									B	B
																									-	A
																									B	A
																									B	A
																									B	B
																									A	A
																									A	A
																									-	A
																									-	B
																									-	B
																									BS00099290	BS00003649
																									6A	7B
																									100.1	70.5
																									A	B
																									B	A
																									A	B
																									A	-
																									B	B
																									B	A
																									A	A
																									A	A
																									B	A
																									B	A
																									-	A
																									A	B
																									B	B
																									B	B
																									A	B
																									B	A
																									-	A
																									B	-
																									A	-
																									A	B
																									B	A
																									B	A
																									B	A
																									B	-
																									A	B
																									A	A
																									A	B
																									B	A
																									B	A
																									B	A
																									B	A
																									A	A
																									B	A
																									B	B
																									B	B
																									B	A
																									B	A
																									B	-
																									A	B
																									-	B
																									A	B
																									A	A
																									B	A
																									B	B
																									A	A
																									A	A
																									A	A
																									B	B
																									A	A
																									B	B
																									A	B
																									A	B
																									B	B
																									B	-
																									B	B
																									A	A
																									B	B
																									A	B
																									A	A
																									A	B
																									B	B
																									B	B
																									A	B
																									A	B
																									-	A
																									A	B
																									B	A
																									A	A
																									A	A
																									B	B
																									B	B
																									A	B
																									B	-
																									A	A
																									A	A
																									B	A
																									B	A
																									B	B
																									B	B
																									A	A
																									A	B
																									A	A
																									A	-
																									A	B
																									B	-
																									B	-
																									A	A
																									-	B
																									B	-
																									B	B
																									A	A
																									B	B
																									-	A
																									B	A
																									B	A
																									B	B
																									A	A
																									A	A
																									-	A
																									-	B
																									-	B
																									BS00099290	BS00003649
																									6A	7B
																									100.1	70.5
																									A	B
																									B	A
																									A	B
																									A	-
																									B	B
																									B	A
																									A	A
																									A	A
																									B	A
																									B	A
																									-	A
																									A	B
																									B	B
																									B	B
																									A	B
																									B	A
																									-	A
																									B	-
																									A	-
																									A	B
																									B	A
																									B	A
																									B	A
																									B	-
																									A	B
																									A	A
																									A	B
																									B	A
																									B	A
																									B	A
																									B	A
																									A	A
																									B	A
																									B	B
																									B	B
																									B	A
																									B	A
																									B	-
																									A	B
																									-	B
																									A	B
																									A	A
																									B	A
																									B	B
																									A	A
																									A	A
																									A	A
																									B	B
																									A	A
																									B	B
																									A	B
																									A	B
																									B	B
																									B	-
																									B	B
																									A	A
																									B	B
																									A	B
																									A	A
																									A	B
																									B	B
																									B	B
																									A	B
																									A	B
																									-	A
																									A	B
																									B	A
																									A	A
																									A	A
																									B	B
																									B	B
																									A	B
																									B	-
																									A	A
																									A	A
																									B	A
																									B	A
																									B	B
																									B	B
																									A	A
																									A	B
																									A	A
																									A	-
																									A	B
																									B	-
																									B	-
																									A	A
																									-	B
																									B	-
																									B	B
																									A	A
																									B	B
																									-	A
																									B	A
																									B	A
																									B	B
																									A	A
																									A	A
																									-	A
																									-	B
																									-	B
																									BS00099290	BS00003649
																									6A	7B
																									100.1	70.5
																									A	B
																									B	A
																									A	B
																									A	-
																									B	B
																									B	A
																									A	A
																									A	A
																									B	A
																									B	A
																									-	A
																									A	B
																									B	B
																									B	B
																									A	B
																									B	A
																									-	A
																									B	-
																									A	-
[truncated: 4,554 more rows]
