# Supplementary material for: QTL mapping of agronomic traits in wheat using the UK Avalon × Cadenza reference mapping population grown in Kazakhstan
Source: PeerJ. 2021 Feb 18;9:e10733. doi: 10.7717/peerj.10733 (PMC7897413; doi:10.7717/peerj.10733)
Supplement: Supplemental Information 6 [file peerj-09-10733-s006.xlsx]

## Sheet: Karaganda 2013-2015
Supplemental Table for Raw field data in three regions of Kazakhstan
		Heading time (days)				Seed maturation time (days)				Plant height (cm)				Spike length (cm)				Thousand kernal/grain weight (g)				Productive tillerring (pcs)				Number of kernels per main spike (pcs)				Yield per square meter (g)
№ п/п	DHL	2013	2014	2015	Average	2013	2014	2015	Average	2013	2014	2015	Average	2013	2014	2015	Average	2013	2014	2015	Average	2013	2014	2015	Average	2013	2014	2015	Average	2013	2014	2015	Average
1	АхС - 1	57	51	42	50	40	51	47	46	42	47.3333	81.0333	56.7889	7.83333	4.66667	8.1	6.86667	38.4951	39.3999	32.9047	36.9332	1.60333	1.12	1.3	1.34111	32.0667	15.8667	31.3333	26.4222	91.7333	57.0933	385.978	178.268
2	АхС - 2	55	47	42	48	40	52	47	46.3333	39.3333	44	75.3333	52.8889	9.5	5	6.73333	7.07778	30.7061	32.7409	29.7056	31.0508	1.36333	1.15	1.1	1.20444	42.1333	18.7333	25.6	28.8222	71.9867	68.4133	256.523	132.308
3	АхС - 6	57	47	42	48.6667	40	52	47	46.3333	35.6667	48.6667	76.1333	53.4889	7.5	5.33333	7.2	6.67778	28.2207	36.7152	30.2693	31.7351	1.64333	1.02	1.1	1.25444	32	22.8667	27.1333	27.3333	92.2933	46.5733	303.766	147.544
4	АхС - 7	52	51	42	48.3333	40	51	47	46	45.1667	43	74.8667	54.3444	8.16667	5	6.36667	6.51111	36.8028	29.6023	26.0114	30.8055	1.59667	1.01	1.2	1.26889	31	18.2	23.9667	24.3889	69.96	44.8933	200.191	105.015
5	АхС - 8	59	47	42	49.3333	40	52	47	46.3333	39.1667	50.6667	68.0333	52.6222	7.5	5.66667	6.23333	6.46667	31.8628	34.4658	25.8017	30.7101	1.19333	1.02	1	1.07111	40.5333	13.8667	21.7333	25.3778	73.7333	60.5733	190.4	108.236
6	АхС - 16	53	47	42	47.3333	39	52	47	46	40.6667	52.6667	54.9	49.4111	8	5.66667	6.1	6.58889	36.4767	42.0491	27.5101	35.3453	1.53	1.12	1.36667	1.33889	36	15.4	24.5333	25.3111	79.24	72.7867	284.038	145.355
7	АхС - 17	52	51	42	48.3333	40	51	47	46	40.1667	37.6667	58.7667	45.5333	7.16667	4	6.96667	6.04444	32.0259	31.211	28.2589	30.4986	1.65667	1.13	1.3	1.36222	34	14.8667	27.1333	25.3333	62.8	37.0933	282.561	127.485
8	АхС - 18	53	47	42	47.3333	39	52	47	46	38	46.3333	66.8667	50.4	6.66667	5.66667	6.26667	6.2	35.2282	31.7903	28.6848	31.9011	1.29333	1.01	1.3	1.20111	28.9333	15.4667	27.5333	23.9778	51.4667	57.6	213.339	107.468
9	АхС - 19	59	51	42	50.6667	40	51	47	46	47.1667	44	66	52.3889	8.33333	4	6.13333	6.15556	35.9184	31.2032	25.8629	30.9948	1.49667	1.19	1.3	1.32889	36.2	16.9333	21.8	24.9778	113.333	76.2933	211.757	133.794
10	АхС - 21	59	51	42	50.6667	40	51	47	46	52.3333	50.6667	75	59.3333	7.16667	4.33333	8.26667	6.58889	33.0734	39.1038	30.0773	34.0848	1.22	1.03	1.3	1.18333	39.5333	21.2	31.7333	30.8222	67.0667	105.053	255.882	142.667
11	АхС - 22	52	51	40	47.6667	40	51	49	46.6667	40.1667	62.3333	73.0333	58.5111	7.5	6.66667	7.6	7.25556	35.7186	37.6231	41.4542	38.2653	1.57667	1.01	1.6	1.39556	42.6	31.4	30.9333	34.9778	102.733	86.7467	483.658	224.379
12	АхС - 23	52	47	40	46.3333	40	52	46	46	38.6667	52	70.6333	53.7667	6.83333	7.33333	7.33333	7.16667	40.6154	34.1884	40.9164	38.5734	1.26667	1.01	1.5	1.25889	38.0667	32.6	30.2667	33.6444	108.4	128.72	586.496	274.539
13	АхС - 24	53	47	40	46.6667	39	55	46	46.6667	53	43.3333	66.5667	54.3	8	4	6.33333	6.11111	33.5129	32.343	37.4141	34.4234	1.4	1	1.1	1.16667	36.3333	12.5333	23.3333	24.0667	99.2	49.44	353.673	167.438
14	АхС - 27	55	51	42	49.3333	40	51	44	45	36	45	67.1	49.3667	6.83333	5.66667	7.23333	6.57778	33.5728	34.6438	38.6682	35.6283	1.66667	1.05	1.3	1.33889	36.3333	17.7333	26.3333	26.8	68.2667	59.8	338.347	155.471
15	АхС - 41	53	47	40	46.6667	39	55	46	46.6667	42.1667	49.6667	65.9	52.5778	8	5.33333	6.9	6.74444	35.031	32.3402	36.9266	34.7659	1.50667	1.14	1.2	1.28222	32.5333	17.0667	23.6667	24.4222	114	65.76	398.848	192.869
16	АхС - 42	56	47	40	47.6667	41	52	46	46.3333	51.1667	48.6667	58.1333	52.6556	8.5	5.66667	6.46667	6.87778	34.1216	41.3452	37.3318	37.5995	1.90667	1.17	1	1.35889	38.5333	16.5333	23	26.0222	59.8667	97.8347	302.251	153.317
17	АхС - 43	59	49	42	50	40	53	44	45.6667	41.6667	47.6667	67.7667	52.3667	9.5	6	8.1	7.86667	31.2784	38.9465	45.8379	38.6876	1.67	1.12	2	1.59667	46.6667	18.5333	30.3333	31.8444	131.6	81.6533	421.83	211.695
18	АхС - 44	59	47	39	48.3333	40	52	47	46.3333	41.8333	46.6667	56.8667	48.4556	7.66667	5	6.03333	6.23333	39.3815	36.1594	36.9776	37.5061	1.58	1.01	1.4	1.33	37.4667	16.6	22.6667	25.5778	91.3333	64.5067	573.205	243.015
19	АхС - 46	59	49	42	50	40	53	44	45.6667	44.3333	54.3333	60.3	52.9889	7.33333	5	5.9	6.07778	33.4328	28.7766	38.5785	33.596	1.50333	1.01	2.3	1.60444	39.6667	19.6	21.3333	26.8667	88.6667	97.7467	802.83	329.748
20	АхС - 52	59	45	39	47.6667	40	54	53	49	53.6667	46.3333	67.6667	55.8889	9.33333	6	6.93333	7.42222	31.8226	33.4137	42.2743	35.8368	1.70667	1.03	2.2	1.64556	38	25.0667	28.3333	30.4667	86	35.64	1228.4	450.012
21	АхС - 53	53	47	42	47.3333	39	52	50	47	40.3333	47.6667	57.6333	48.5444	7.83333	4	5.93333	5.92222	35.1211	35.6394	33.0369	34.5991	1.56	1.05	1.86667	1.49222	40.6	13.3333	23.6667	25.8667	99.7333	54.4933	693.651	282.626
22	АхС - 54	57	47	42	48.6667	41	52	50	47.6667	52	46	70.2667	56.0889	7.66667	4.33333	7.8	6.6	31.8578	34.2926	33.0918	33.0808	1.78667	1.04	1.4	1.40889	39.6667	20.0333	27	28.9	76.8	56.6827	583.627	239.037
23	АхС - 55	57	49	44	50	41	53	48	47.3333	52	47.3333	62.0333	53.7889	7.66667	4.66667	6.16667	6.16667	36.6715	35.4191	29.3	33.7969	1.50333	1.1	1.4	1.33444	39.8	18.6	20	26.1333	105.867	49.76	523.549	226.392
24	АхС - 58	59	49	42	50	40	53	50	47.6667	52	45.6667	69	55.5556	8.33333	4	7.33333	6.55556	31.0266	31.1753	27.8023	30.0014	1.55	1.01	1.2	1.25333	35.6	14.9333	26.6667	25.7333	122.267	41.0933	327.459	163.606
25	АхС - 62	59	49	42	50	40	53	50	47.6667	45.5	49.3333	61.6667	52.1667	6.5	5	6.26667	5.92222	37.7794	33.5075	31.4127	34.2332	1.49667	1.03	1.2	1.24222	45.9333	17.2	20.6667	27.9333	89.0667	94.3867	370.899	184.784
26	АхС - 65	59	47	44	50	40	52	48	46.6667	56.3333	43.3333	59.9667	53.2111	8	3.66667	6.3	5.98889	36.3126	33.0147	38.0938	35.8071	1.31667	1	2	1.43889	25.2	14.6667	23.3333	21.0667	86.1333	54.64	780.498	307.09
27	АхС - 70	53	47	42	47.3333	39	52	50	47	43.6667	45	63.9667	50.8778	7.33333	5.66667	6.83333	6.61111	35.2396	33.3194	31.8889	33.4826	1.38	1	1.4	1.26	34.8667	15.8667	24	24.9111	158.667	47.48	421.269	209.139
28	АхС - 71	53	47	42	47.3333	39	52	50	47	62.5	58.6667	57	59.3889	8.16667	7	5.76667	6.97778	33.4657	34.7753	32.798	33.6797	1.81667	1.02	1.10333	1.31333	39.6	27.0667	21.3333	29.3333	94.9333	64.44	329.934	163.102
29	АхС - 73	54	47	44	48.3333	38	52	48	46	52.8333	56.6667	68.6333	59.3778	8.33333	5.66667	6.86667	6.95556	33.7269	32.2165	33.6773	33.2069	1.4	1.02	1.01667	1.14556	32.2667	21.6667	27	26.9778	100.32	69.1867	436.364	201.957
30	АхС - 74	52	47	44	47.6667	40	52	45	45.6667	51	55.3333	75.9333	60.7556	8	4.33333	8.33333	6.88889	34.9109	37.316	39.0607	37.0959	1.41667	1.02	1.18333	1.20667	35.4667	13.8667	30.2667	26.5333	81.0667	73.5467	368.493	174.369
31	АхС - 79	59	47	42	49.3333	40	52	47	46.3333	27.3333	49.6667	56.0667	44.3556	7.16667	4.33333	5.8	5.76667	37.708	37.9635	33.5542	36.4086	1.77667	1.06	1.23667	1.35778	46.6667	15.4	18.6	26.8889	107.413	47.4667	244.698	133.193
32	АхС - 80	57	49	42	49.3333	40	50	47	45.6667	56.1667	46.6667	54.7	52.5111	8	4.33333	6.83333	6.38889	36.5828	29.959	32.681	33.0743	1.39	1.04	1.25667	1.22889	43.9333	12.4667	20.2667	25.5556	79.4667	49.32	236.759	121.849
33	АхС - 81	53	49	40	47.3333	39	53	49	47	35.8333	48	57.8667	47.2333	9.83333	4	6.8	6.87778	39.1294	40.2181	31.1643	36.8373	1.40667	1.06	1.27333	1.24667	32.4	12.2	20.3333	21.6444	109.6	56.64	187.148	117.796
34	АхС - 84	57	51	40	49.3333	40	56	49	48.3333	50.5	45	55.7	50.4	7.5	4.33333	6.63333	6.15556	38.7685	34.1461	34.7827	35.8991	1.36333	1.01	1.21	1.19444	38.1333	9.46667	20.6667	22.7556	106.12	54.7333	267.475	142.776
35	АхС - 85	59	51	40	50	40	56	49	48.3333	49.6667	46	57	50.8889	10.1667	4.33333	5.33333	6.61111	35.9555	34.7736	32.2536	34.3276	1.68	1.28	1.21333	1.39111	34.2667	14.4667	18.4667	22.4	44.0667	81.8533	198.829	108.25
36	АхС - 87	53	49	40	47.3333	39	53	49	47	61	42.3333	54.8	52.7111	8.66667	4.66667	5.33333	6.22222	32.2312	30.7186	34.4357	32.4618	1.29333	1	1.23333	1.17556	35.2	16.1333	17.8	23.0444	91.7333	86.5867	193.543	123.954
37	АхС - 88	57	49	40	48.6667	40	53	49	47.3333	34.1667	39	64.0667	45.7444	7.5	3	6.26667	5.58889	34.9168	34.9111	32.3561	34.0613	1.55667	1.04	1.16667	1.25444	36.3333	11	21.5333	22.9556	68.2667	45.3467	175.795	96.4695
38	АхС - 92	57	51	40	49.3333	42	56	49	49	42.1667	35.3333	59.2667	45.5889	8.16667	4	6.06667	6.07778	31.2896	32.4536	33.1068	32.2833	1.46333	1.03	1.17333	1.22222	36.1333	16	21.2667	24.4667	74	49.7867	150.322	91.3694
39	АхС - 93	51	47	40	46	41	52	49	47.3333	39.8333	43.3333	55.1333	46.1	8.33333	5.33333	6.2	6.62222	37.2922	30.9075	34.1482	34.116	1.58667	1	1.25	1.27889	28.7333	21.5333	18.8667	23.0444	56.2667	73.7867	258.206	129.42
40	АхС - 96	53	47	42	47.3333	39	52	52	47.6667	41.3333	43.6667	55.5	46.8333	7.16667	4.66667	7.33333	6.38889	35.3523	33.9224	40.2163	36.497	1.8	1.09	1.12	1.33667	28.5333	19.8667	33.4667	27.2889	86.5333	76.6667	391.583	184.928
41	АхС - 98	53	47	44	48	39	52	50	47	30.8333	45.6667	48.1	41.5333	7	5.66667	6.4	6.35556	45.4223	38.0087	31.7703	38.4004	1.43667	1.22	1.33333	1.33	28	16.7333	27.7333	24.1556	81.2	32.1067	249.063	120.79
42	АхС - 99	54	47	44	48.3333	38	52	50	46.6667	39.8333	49.6667	47.2	45.5667	7.83333	6	6.2	6.67778	34.348	33.6629	31.8677	33.2929	1.78667	1.06	1.18667	1.34444	44.4	21.9333	24.1333	30.1556	67.6	28.7333	198.436	98.2563
43	АхС - 101	53	49	44	48.6667	39	53	50	47.3333	40.8333	42	51.0667	44.6333	9.33333	4	6.26667	6.53333	30.5099	32.7547	33.5826	32.2824	1.50333	1.03	1.33333	1.28889	44.6667	17.8667	27.7333	30.0889	99.2	43.0267	267.934	136.72
44	АхС - 102	53	47	44	48	39	52	50	47	40.8333	35.3333	49.2	41.7889	7.66667	4	6.6	6.08889	34.9519	31.5375	32.27	32.9198	1.36667	1	1.25667	1.20778	27.9333	12.5333	27	22.4889	93.7333	14.2	192.795	100.243
45	АхС - 103	54	49	40	47.6667	38	53	54	48.3333	46.8333	42.6667	46	45.1667	8.5	4.66667	5.9	6.35556	41.3475	34.8682	30.2286	35.4814	1.27667	1.1	1.27	1.21556	30.3333	17	22.4	23.2444	64.4	54.76	285.407	134.856
46	АхС - 104	57	47	40	48	42	52	54	49.3333	48.1667	43.3333	48.8333	46.7778	8.66667	4.33333	5.8	6.26667	33.2018	34.9894	32.4813	33.5575	1.45667	1.05	1.44333	1.31667	37.7333	20.4667	24.6667	27.6222	68.9333	49.96	344.922	154.605
47	АхС - 105	54	49	40	47.6667	38	53	54	48.3333	62.5	43.6667	42.2333	49.4667	7.83333	5.33333	6.03333	6.4	34.9664	36.7209	34.2486	35.312	1.55667	1.05	1.36	1.32222	45.3333	14.0667	28.6	29.3333	88.5333	59.1333	345.691	164.452
48	АхС - 107	55	47	44	48.6667	37	52	50	46.3333	50.3333	47	47.9333	48.4222	7.83333	5	6.86667	6.56667	36.2818	37.9218	33.8338	36.0124	1.15333	1.02	1.32333	1.16556	36.3333	16.4	30	27.5778	89.4667	55.7867	458.585	201.28
49	АхС - 108	54	47	44	48.3333	38	52	50	46.6667	39.1	39	46.2	41.4333	7.26667	4.33333	6.46667	6.02222	31.1843	36.5714	35.2621	34.3393	1.13	1.13	1.42667	1.22889	28.2	20.8	28.0667	25.6889	107.867	51.96	487.093	215.64
50	АхС - 109	54	49	42	48.3333	38	53	52	47.6667	48.6667	45.3333	47.2667	47.0889	8	5.33333	7.4	6.91111	27.8027	38.8997	37.3142	34.6722	1.24333	1.04	1.32667	1.20333	34.4	24.9333	34.6667	31.3333	63.6	58.4133	328.878	150.297
51	АхС - 114	55	51	42	49.3333	40	56	52	49.3333	44.3333	44	51.6667	46.6667	7.16667	5	7.93333	6.7	29.9566	34.8867	39.4512	34.7648	1.17	1	1.40667	1.19222	36.1333	27.2	32.6	31.9778	68.5333	73.16	571.138	237.611
52	АхС - 115	52	49	42	47.6667	40	53	52	48.3333	43	49.6667	40.7333	44.4667	8.5	4.33333	6.26667	6.36667	34.2626	31.4875	30.085	31.945	1.24	1.08	1.36333	1.22778	31.5333	20.0667	20.8	24.1333	65.6	62	327.997	151.866
53	АхС - 116	57	49	44	50	42	53	50	48.3333	63.6667	42.3333	40.3667	48.7889	9.33333	5.66667	6.1	7.03333	27.6205	29.9923	29.8299	29.1475	1.34667	1.13333	1.29	1.25667	40.1333	23.6	26.6	30.1111	83.7333	86.5867	339.612	169.977
54	АхС - 117	57	49	44	50	42	53	50	48.3333	44.3333	40.3333	38.0667	40.9111	7.33333	5.33333	5.33333	6	29.8269	29.8722	29.6426	29.7806	1.25	1.03	1.37667	1.21889	38	19.1333	18.2	25.1111	86	57.9733	226.776	123.583
55	АхС - 119	58	51	44	51	41	56	50	49	49.6667	42.6667	51.0333	47.7889	7.66667	4.66667	7.23333	6.52222	35.323	30.2407	28.1201	31.2279	1.17333	1.02	1.31	1.16778	33.6	21.5333	29.1333	28.0889	100	46.7733	339.875	162.216
56	АхС - 120	52	47	44	47.6667	40	55	50	48.3333	44.1667	42	43.4	43.1889	8.33333	5	6.46667	6.6	31.5864	31.6259	30.198	31.1368	1.20667	1	1.20333	1.13667	40.9333	27.9	20.4667	29.7667	80.9333	47.1467	208.555	112.212
57	АхС - 122	57	51	44	50.6667	42	56	50	49.3333	43.1667	40	37.8	40.3222	7.33333	3	4.4	4.91111	42.7953	31.3401	27.2162	33.7839	1.25667	1.06	1.2	1.17222	33.1333	13.7333	14.4	20.4222	78	40.4533	162.561	93.6715
58	АхС - 125	57	49	44	50	38	53	50	47	42.8333	44.3333	33.3	40.1556	7.16667	5	4.83333	5.66667	32.7041	29.8642	28.7567	30.4417	1.10333	1.02	1.36333	1.16222	39.3333	26.6667	17.6	27.8667	86.2667	92.56	220.097	132.975
59	АхС - 126	53	47	42	47.3333	39	52	52	47.6667	45.6667	46	47.1333	46.2667	7.5	5.66667	6.4	6.52222	41.5366	29.9729	32.6245	34.7113	1.01667	1.09	1.25	1.11889	34.6667	31.8	24.2	30.2222	95.0667	74.3333	287.677	152.359
60	АхС - 129	55	51	42	49.3333	41	56	50	49	43.3333	52.3333	48.8	48.1556	8.5	7	8.4	7.96667	33.2223	40.4219	36.2766	36.6403	1.18333	1.12	1.03667	1.11333	35.2667	16.3333	36.5333	29.3778	78.9333	124.84	296.96	166.911
61	АхС - 130	57	51	42	50	38	56	50	48	46.6667	42.3333	47.1333	45.3778	7.5	4.66667	7.2	6.45556	32.165	36.8	31.9841	33.6497	1.23667	1.05	1.09333	1.12667	27.7333	26.1333	28.7333	27.5333	74	39.5867	303.536	139.041
62	АхС - 132	55	49	44	49.3333	41	53	48	47.3333	53	41	46.3	46.7667	9	5	5.56667	6.52222	35.7903	41.8052	28.8851	35.4936	1.25667	1.08	1.08333	1.14	28.0667	17.3333	22.0667	22.4889	85.6	53.4667	182.623	107.23
63	АхС - 133	57	51	42	50	38	56	50	48	50.5	44.6667	50.5	48.5556	8.16667	5.66667	6.96667	6.93333	33.0258	40.2333	32.9134	35.3908	1.27333	1.14	1.09333	1.16889	33.9333	9.93333	25.7333	23.2	66.2667	61.2267	220.69	116.061
64	АхС - 134	54	49	42	48.3333	38	50	50	46	38.8333	37.3333	49.7333	41.9667	7	4	6.4	5.8	34.7111	32.5051	28.1739	31.7967	1.21	1	1.25667	1.15556	30.5333	16.7333	27.7333	25	73.5333	28.5733	364.801	155.636
65	АхС - 135	55	51	42	49.3333	41	56	50	49	43	38.3333	48.3333	43.2222	9.83333	4	5.73333	6.52222	28.8993	37.2596	29.6697	31.9429	1.21333	1	1.04333	1.08556	38.6667	18.6667	19.2	25.5111	84.4	49.0533	272.688	135.38
66	АхС - 137	53	51	42	48.6667	39	56	50	48.3333	34.5	40.6667	35.1	36.7556	6.66667	4	4.7	5.12222	36.0381	38.8766	29.5628	34.8258	1.23333	1	1.10667	1.11333	30.5333	11.2667	15.2	19	86.3067	47.3067	178.771	104.128
67	АхС - 138	52	51	46	49.6667	40	56	46	47.3333	48.3333	34.3333	43.1	41.9222	7.16667	4	5.66667	5.61111	29.5141	31.5	31.186	30.7334	1.16667	1.03	1.06333	1.08667	35.6667	12.3333	16.5333	21.5111	87.4667	21.2667	178.681	95.8049
68	АхС - 139	55	49	42	48.6667	37	50	50	45.6667	38.3333	37.3333	49.1	41.5889	6.16667	4	6.1	5.42222	33.9238	33.1333	30.3176	32.4582	1.17333	1.24	1.01333	1.14222	32.9333	20.4667	22.3333	25.2444	87.0133	24.48	197.699	103.064
69	АхС - 140	54	49	44	49	38	50	48	45.3333	33.8333	46	46.4667	42.1	7.83333	5	5.33333	6.05556	38.9444	37.1177	17.3626	31.1416	1.25	1.04	1	1.09667	26.1333	21.7333	17.6667	21.8444	73.3867	81.7333	121.067	92.0622
70	АхС - 141	52	51	44	49	40	56	50	48.6667	42.3333	49	54.1333	48.4889	8	5	6.33333	6.44444	38.4935	39.2336	31.19	36.3057	1.12	1.12	1.08667	1.10889	26.8	20.4667	27.1333	24.8	67.4667	65.08	239.167	123.905
71	АхС - 143	55	49	44	49.3333	40	50	50	46.6667	27.5	49.6667	52.4	43.1889	6.83333	7.33333	6	6.72222	33.0468	36.0075	30.8824	33.3122	1.33333	1.03	1.1	1.15444	44.5333	32.5333	24.6667	33.9111	82.6667	76.8667	227.443	128.992
72	АхС - 145	53	51	42	48.6667	39	56	52	49	45.6667	48.3333	45.8	46.6	6.66667	6.33333	5.96667	6.32222	30.6814	33.8767	34.1388	32.899	1.18667	1.07	1.1	1.11889	33.2667	28.3333	19.2	26.9333	93.1333	90.64	218.738	134.17
73	АхС - 146	55	49	44	49.3333	40	50	50	46.6667	49.3333	46	46.5333	47.2889	8.33333	5.66667	4.86667	6.28889	31.2201	33.0333	33.72	32.6578	1.33333	1.04	1.2	1.19111	40.7333	25.4333	15	27.0556	81.1333	93.2267	158.208	110.856
74	АхС - 147	53	49	44	48.6667	39	50	50	46.3333	43.8333	43.6667	46.2333	44.5778	7	5	6.3	6.1	32.1175	34.2096	29.2292	31.8521	1.25667	1	1	1.08556	39.1333	26	24.1333	29.7556	83.0667	103.493	152.496	113.019
75	АхС - 148	54	51	44	49.6667	38	56	50	48	35.6667	47	44.3	42.3222	7.16667	6	5.56667	6.24444	36.7589	32.4673	30.1927	33.1396	1.27	1.02	1.21	1.16667	37	31.5333	17.6	28.7111	90.2667	87.2933	167.728	115.096
76	АхС - 150	55	51	44	50	40	56	50	48.6667	55.1667	43	37.4333	45.2	8.66667	4.33333	5.3	6.1	30.7809	31.7143	31.2159	31.237	1.18333	1	1.21333	1.13222	42.7333	15.4667	14.2	24.1333	109.12	28.4667	119.727	85.7712
77	АхС - 152	55	49	44	49.3333	40	50	50	46.6667	47	46	41.8667	44.9556	7.16667	5	5.53333	5.9	33.612	33.6043	33.8653	33.6939	1.26333	1.01	1.23333	1.16889	35.2	20	17.4	24.2	92.2667	83.2	191.33	122.265
78	АхС - 156	53	49	44	48.6667	39	50	50	46.3333	47.8333	38.6667	35.1	40.5333	7.5	4	5.63333	5.71111	40.9499	31.6574	27.9617	33.523	1.37	1.03	1.16667	1.18889	39.3333	13.7333	17.6	23.5556	89.8667	49.9067	213.193	117.656
79	АхС - 158	55	51	44	50	40	56	50	48.6667	40.8333	39.3333	34.6	38.2556	8.16667	4	4.6	5.58889	32.9481	28.1174	25.7768	28.9474	1.45333	1	1.23667	1.23	42.9333	14.6	15.7333	24.4222	96.24	63.7333	152.782	104.252
80	АхС - 162	55	51	39	48.3333	40	56	51	49	40	42.6667	45.0333	42.5667	7.83333	4.33333	6.16667	6.11111	36.3504	33.2742	39.1727	36.2658	1.70667	1.12	1.25667	1.36111	51.8	20.6667	23.2	31.8889	89.44	73.6533	208.712	123.935
81	АхС - 163	57	49	44	50	38	50	46	44.6667	34.6667	45.3333	45.5667	41.8556	9.33333	5	5.83333	6.72222	33.3718	41.2751	36.1087	36.9185	1.53333	1.05	1.27333	1.28556	42.6667	21.6	23.8	29.3556	90.2133	109.867	216.229	138.77
82	АхС - 164	57	51	44	50.6667	38	56	46	46.6667	40.5	43.6667	44.7667	42.9778	6.5	5.66667	5.73333	5.96667	35.7965	31.4469	29.8332	32.3589	1.32667	1	1.21	1.17889	32.9333	24	19.9333	25.6222	97.5867	76.28	124.079	99.3152
83	АхС - 165	58	51	44	51	39	56	46	47	40.6667	48.3333	39.2333	42.7444	7.16667	6	5.63333	6.26667	32.8234	39.8155	27.8935	33.5108	1.28	1	1.21333	1.16444	47.5333	18.6	18.8	28.3111	101.6	82.4667	183.865	122.644
84	АхС - 166	53	49	44	48.6667	39	50	46	45	51.8333	47.3333	38.3333	45.8333	10.3333	6.33333	5.26667	7.31111	35.9941	34.9866	28.6196	33.2001	1.44333	1.07	1.23333	1.24889	41.7333	20.4	15.8667	26	99.6	104.533	124.911	109.682
85	АхС - 167	56	51	44	50.3333	40	56	46	47.3333	46	46.6667	39	43.8889	9.5	5.66667	5.7	6.95556	34.1857	35.1807	32.5258	33.9641	1.36	1.05	1.16667	1.19222	41.0667	20.9	18.6667	26.8778	94.4	95.7867	174.297	121.495
86	АхС - 168	55	49	44	49.3333	41	50	46	45.6667	58.1667	49.3333	35.6667	47.7222	7.5	6	4.46667	5.98889	30.4634	34.2427	32.3411	32.349	1.32333	1.03	1.17333	1.17556	50.6667	21.8	11.6	28.0222	79.4267	68.1333	110.504	86.0212
87	АхС - 170	54	47	44	48.3333	38	52	46	45.3333	41.1667	39.3333	36.6333	39.0444	7.83333	5	4.16667	5.66667	38.7977	27.3959	30.2101	32.1346	1.42667	1	1.25	1.22556	30.9333	18.0667	14.2	21.0667	94.4	73.5067	108.88	92.2623
88	АхС - 172	56	47	42	48.3333	36	52	48	45.3333	42.3333	40.6667	52.2333	45.0778	7	4.33333	6.96667	6.1	37.2334	29.528	32.0736	32.945	1.32667	1.02	1.12	1.15556	36.6667	17.9333	22.6667	25.7556	90.2667	64.8	228.346	127.804
89	АхС - 173	54	47	42	47.6667	38	52	48	46	46.6667	31.6667	33.5333	37.2889	7.16667	4	4.13333	5.1	35.0706	20.665	35.3305	30.3553	1.40667	1.04	1.33333	1.26	37.6667	13.1333	10.8	20.5333	85.3333	40.4667	117.451	81.0836
90	АхС - 176	55	47	42	48	37	52	50	46.3333	53.6667	30	41.9333	41.8667	7	3.66667	6.26667	5.64444	32.6322	23.1381	33.8336	29.868	1.36333	1	1.18667	1.18333	34.2667	10.2667	30.5333	25.0222	93.3333	23.6267	243.259	120.073
91	АхС - 186	54	49	39	47.3333	38	53	53	48	53.6667	43.6667	46.2667	47.8667	8	5.66667	5.26667	6.31111	29.2924	32.1337	36.5773	32.6678	1.35	1.2	1.25667	1.26889	36.5333	27.4	19	27.6444	81.3333	39.3733	175.161	98.6227
92	АхС - 188	53	51	42	48.6667	39	56	50	48.3333	54	41.6667	39.9	45.1889	9	5.33333	6.03333	6.78889	37.0823	31.1691	32.8524	33.7013	1.44333	1	1.27	1.23778	31.7333	24.6667	26.8667	27.7556	77.2	48.1867	253.68	126.356
93	АхС - 191	55	49	42	48.6667	41	53	50	48	44.8333	47.3333	40.1333	44.1	8.83333	6.66667	5.8	7.1	32.2861	29.7091	29.8486	30.6146	1.59	1.01	1.23667	1.27889	42.2	37.5333	24.2	34.6444	68	58.32	191.514	105.945
94	АхС - 192	56	51	42	49.6667	36	56	50	47.3333	41.8333	33	38.6	37.8111	8	5.33333	5.06667	6.13333	32.5018	27.838	30.6504	30.3301	1.71	1	1.1	1.27	39.6667	24	16.4	26.6889	95.6	58.04	165.405	106.348
95	АхС - 193	53	49	42	48	39	53	50	47.3333	47.8333	34.6667	29.6333	37.3778	8	4.66667	3.96667	5.54444	33.2781	26.3552	30.5821	30.0718	1.48333	1.06	1.3	1.28111	50.6	19.8	11.8667	27.4222	88.6667	45.28	124.819	86.2553
96	АхС - 194	54	49	42	48.3333	38	53	50	47	34	40.6667	34.6333	36.4333	6.83333	4	4.7	5.17778	32.6762	31.6105	30.4727	31.5865	1.3	1.04	1.23333	1.19111	41.2667	16.2	17.6	25.0222	119.2	83.3467	160.384	120.977
97	АхС - 195	54	47	42	47.6667	38	52	50	46.6667	32	44.3333	36.1333	37.4889	7.16667	5.66667	6.66667	6.5	36.9117	35.2108	31.5684	34.5636	1.4	1.03	1.03333	1.15444	38.1333	23.8667	28.8	30.2667	88	40.1333	232.971	120.368
98	АхС - 196	53	51	42	48.6667	39	56	50	48.3333	53.5	41.6667	39.4	44.8556	8.66667	6	5.73333	6.8	33.7858	32.492	25.4244	30.5674	1.42	1.12	1.3	1.28	25.2	17.5333	36.8667	26.5333	78.9333	38.4133	243.187	120.178
99	АхС - 200	52	49	42	47.6667	40	53	52	48.3333	55.1667	46.6667	43.9667	48.6	9.5	4.66667	7.5	7.22222	39.2125	32.239	36.8871	36.1129	1.33333	1	1.15	1.16111	32.4	15.6667	37.0667	28.3778	86.4	49.24	387.226	174.289
100	АхС - 203	53	45	42	46.6667	39	54	52	48.3333	37.8333	45.6667	35.5667	39.6889	9	5.33333	6.23333	6.85556	40.2413	33.933	36.9658	37.0467	1.33	1.04	1.07667	1.14889	31.8	24.4	32.5333	29.5778	73.44	80.3067	238.88	130.876
101	АхС - 205	53	51	42	48.6667	39	56	52	49	52.5	46.3333	30.9	43.2444	7.33333	6	4.5	5.94444	38.8336	23.3988	28.0875	30.1066	1.46333	1.1	1.07333	1.21222	30.8667	20.0667	15.6667	22.2	79.4667	47.4667	57.6121	61.5151

## Sheet: Kyzylorda 2013-2015
		Heading time (days)				Seed maturation time (days)				Plant height (cm)				Spike length (cm)				Thousand kernal/grain weight (g)				Productive tillerring (pcs)				Number of kernels per main spike (pcs)				Yield per square meter (g)
№ п/п	DHL	2013	2014	2015	Average	2013	2014	2015	Average	2013	2014	2015	Average	2013	2014	2015	Average	2013	2014	2015	Average	2013	2014	2015	Average	2013	2014	2015	Average	2013	2014	2015	Average
1	АхС - 1	67	72	74	71	27	20	20	22.3333	54.6667	63.9333	72.7667	63.7889	7.33333	9.26667	8.5	8.36667	41.14	36.6667	35.72	37.8422	2.0627	2.7317	2.6704	2.48827	35.6667	43.3333	42.5	40.5	361.999	662.251	523.049	515.766
2	АхС - 2	73	72	74	73	21	20	20	20.3333	41.6667	54	71.6	55.7556	8.33333	7.16667	9.26667	8.25556	37.61	36.3333	35.4067	36.45	1.61882	1.57016	2.12061	1.76986	45.6667	41.3333	44.8333	43.9444	236.503	363.515	422.791	340.936
3	АхС - 6	71	68	74	71	23	22	20	21.6667	48	60.3333	69.9667	59.4333	8.66667	7.66667	9.46667	8.6	37.6267	40.3333	37.4667	38.4756	1.86172	1.94582	2.26218	2.02324	43.6667	37.3333	48.1667	43.0556	172.408	429.595	508.006	370.003
4	АхС - 7	61	66	68	65	27	24	22	24.3333	52.5	61.7667	69.5667	61.2778	7.5	9	10	8.83333	38.71	39.6667	38.59	38.9889	1.56197	2.14424	2.22249	1.97623	41.6667	47	51.5	46.7222	200.681	603.059	612.298	472.013
5	АхС - 8	67	72	70	69.6667	21	22	20	21	46.3333	55.5	61.6667	54.5	7.83333	8.16667	9.66667	8.55556	37.8067	36	37.1	36.9689	1.26515	2.1555	1.97652	1.79906	43.6667	41.3333	50.5	45.1667	302.653	455.093	564.303	440.683
6	АхС - 16	69	72	70	70.3333	23	20	22	21.6667	40.1667	55.1667	62.4	52.5778	6.66667	7.33333	9.2	7.73333	37.5433	35	36.7167	36.42	1.43791	2.02832	2.19795	1.88806	41.6667	45	48.3333	45	269.827	414.615	485.967	390.136
7	АхС - 17	67	70	66	67.6667	21	20	24	21.6667	41.6667	60.9333	59.5667	54.0556	6.66667	7.76667	8.16667	7.53333	37.8133	32	32.5233	34.1122	1.82269	2.73611	1.96459	2.17446	41.6667	38	47.1667	42.2778	262.719	507.416	421.306	397.147
8	АхС - 18	65	68	72	68.3333	25	22	20	22.3333	47.5	65.1667	66.4667	59.7111	8.16667	8.5	8.8	8.48889	39.6567	41.3333	37.93	39.64	1.5118	2.35137	2.39394	2.0857	43.6667	46	46.5	45.3889	243.314	585.298	493.312	440.641
9	АхС - 19	73	72	74	73	23	22	22	22.3333	55.3333	65.1667	70.2667	63.5889	8.33333	8.16667	8.5	8.33333	38.7633	38.3333	36.31	37.8022	2.10556	1.74787	1.83565	1.89636	41.6667	39.3333	47.5	42.8333	292.857	392.448	392.251	359.185
10	АхС - 21	71	72	74	72.3333	25	20	22	22.3333	46.6667	59.6667	73	59.7778	9	7.83333	10.1667	9	38.5367	36.6667	36.4067	37.2033	1.49697	2.06061	1.75588	1.77115	47.6667	40.6667	48.5	45.6111	125.31	451.584	403.795	326.896
11	АхС - 22	65	66	66	65.6667	23	24	24	23.6667	47.1667	58.3333	59.9	55.1333	7.83333	8.33333	8.76667	8.31111	37.2333	34	35.91	35.7144	1.39582	2.45029	1.75227	1.86613	45.6667	45	46.8333	45.8333	253.689	484.043	345.813	361.182
12	АхС - 23	65	66	68	66.3333	25	24	24	24.3333	56.1667	61.1333	74.7333	64.0111	9.16667	6.96667	9.33333	8.48889	42.5867	38.6667	39.8	40.3511	1.80798	2.74006	1.95	2.16601	43.6667	38.6667	45.5	42.6111	361.727	499.632	416.659	426.006
13	АхС - 24	65	72	70	69	27	20	22	23	45.3333	57.5	62.5	55.1111	9.16667	7.83333	9.83333	8.94444	34.1633	33	35.6133	34.2589	1.43978	2.33028	1.74396	1.83801	49.3333	48.6667	51.1667	49.7222	205.295	434.504	413.328	351.043
14	АхС - 27	67	74	68	69.6667	23	22	24	23	45.3333	54.5	59.5	53.1111	8.5	7.66667	9.06667	8.41111	38.8433	34	37.4433	36.7622	0.580897	2.39762	1.80186	1.59346	47.3333	45.3333	48.1667	46.9444	145.588	455.831	423.282	341.567
15	АхС - 41	62	66	66	64.6667	22	24	22	22.6667	55.6667	66.6667	72.9	65.0778	8.66667	7.73333	8.96667	8.45556	41.1533	37.6667	35.7767	38.1989	1.8899	2.80033	2.33197	2.34073	45.3333	42.3333	46.5	44.7222	456.096	564.825	457.464	492.795
16	АхС - 42	62	68	66	65.3333	24	22	24	23.3333	55.8333	65.3333	67.9333	63.0333	10.1667	7.83333	9	9	36.9733	36.6667	37.7633	37.1344	1.60185	1.77105	2.16848	1.84713	51.3333	41.3333	48.8333	47.1667	355.37	366.359	555.486	425.738
17	АхС - 43	62	70	72	68	30	20	22	24	53.6667	63.6667	66.0667	61.1333	8.16667	8	8	8.05556	35.96	35.3333	36.97	36.0878	2.1514	1.74644	1.69295	1.8636	43.3333	44	47.5	44.9444	402.532	370.188	474.191	415.637
18	АхС - 44	69	72	72	71	25	18	22	21.6667	54	56.3333	65.0667	58.4667	9.16667	8	8.06667	8.41111	39.0667	42.3333	40.0767	40.4922	0.891468	1.56656	2.35505	1.60436	45.3333	44.6667	45.5	45.1667	165.177	366.324	555.264	362.255
19	АхС - 46	65	72	68	68.3333	27	18	24	23	54.5	54	62.9	57.1333	9.5	8.8	8.06667	8.78889	39.3733	40.3333	40.2807	39.9958	2.00784	1.79171	2.33528	2.04495	45.3333	44.6667	46.5	45.5	348.674	447.223	665.809	487.235
20	АхС - 52	65	72	68	68.3333	29	18	28	25	51.5	50.1667	58.9333	53.5333	8.33333	9	9.1	8.81111	39.6067	40.3333	37.4967	39.1456	2.14957	1.90922	2.47956	2.17945	41.3333	44	48.5	44.6111	480.275	472.325	573.093	508.564
21	АхС - 53	63	70	68	67	29	22	24	25	51.3333	56.2	62.8667	56.8	7.66667	7.2	8.06667	7.64444	39.39	37	38.0367	38.1422	1.7963	2.10714	2.1762	2.02655	41.3333	36	51.3333	42.8889	309.01	306.6	612.139	409.249
22	АхС - 54	65	72	66	67.6667	23	20	24	22.3333	48.5	53.7333	57.0667	53.1	6.5	7.16667	7.06667	6.91111	36.7067	36.3333	34.78	35.94	2.20193	2.39074	1.95185	2.18151	45.3333	45	50.1667	46.8333	462.889	566.172	474.04	501.034
23	АхС - 55	65	72	72	69.6667	27	20	20	22.3333	60.1333	68.5	73.7	67.4444	9	8.16667	9.16667	8.77778	39.4967	34.3333	36.8407	36.8902	2.09697	2.50789	2.10621	2.23702	45.3333	42.3333	47.5	45.0556	559.511	473.048	434.355	488.971
24	АхС - 58	65	70	70	68.3333	25	20	20	21.6667	49.8333	59.8333	64	57.8889	8.16667	7.5	8.16667	7.94444	33.8933	39	34.2	35.6978	2.24837	2.01595	2.25926	2.17452	47.3333	44.3333	48.5	46.7222	461.15	460.558	474.799	465.502
25	АхС - 62	59	74	64	65.6667	29	20	26	25	64.1667	70	77.6	70.5889	9.16667	8.33333	9.26667	8.92222	39.8267	37	36.45	37.7589	2.00556	1.96481	2.25	2.07346	45.3333	45.3333	43.5	44.7222	451.07	446.369	410.824	436.088
26	АхС - 65	61	74	64	66.3333	29	20	26	25	54.3333	65.4	67.7333	62.4889	8.33333	7.9	8.16667	8.13333	40.8767	39.3333	39.81	40.0067	1.19737	2.48863	1.97222	1.88607	43.3333	40.3333	45.1667	42.9444	201.984	512.377	390.614	368.325
27	АхС - 70	63	74	66	67.6667	27	20	26	24.3333	54.1667	54.9667	55.1667	54.7667	9.33333	9.83333	10.0667	9.74444	41.3133	35.3333	38.9667	38.5378	0.898268	1.839	2.25417	1.66381	49.3333	47.6667	48.5	48.5	165.572	441.264	484.116	363.651
28	АхС - 71	65	74	68	69	27	22	26	25	62.3333	72.6667	79.2333	71.4111	8.66667	9	8.83333	8.83333	37.6067	36	39.9133	37.84	2.20833	1.62336	2.43413	2.08861	47.3333	48	51.1667	48.8333	456.729	414.582	592.934	488.082
29	АхС - 73	59	66	64	63	29	22	26	25.6667	63.1667	66.0333	79.3	69.5	9.16667	8.86667	9.53333	9.18889	36.0367	36	40.7433	37.5933	2.14771	2.42982	2.08772	2.22175	45.3333	46	48.1667	46.5	451.637	542.033	556.225	516.632
30	АхС - 74	65	74	72	70.3333	27	20	22	23	40.1667	44.0667	53.7667	46	7.83333	7	8.43333	7.75556	38.19	34.6667	38.9033	37.2533	2.4	1.60946	2.06871	2.02606	45.3333	44	52.5	47.2778	429.324	351.045	462.601	414.323
31	АхС - 79	65	68	68	67	25	22	24	23.6667	63.3333	69.8333	71.2667	68.1444	9.16667	7.5	8.9	8.52222	42.5367	36	41.1567	39.8978	2.02024	1.95866	2.20305	2.06065	45.3333	40.6667	48.8333	44.9444	445.23	421.097	593.119	486.482
32	АхС - 80	67	76	68	70.3333	25	20	24	23	41.8333	49.8333	49.5	47.0556	8.16667	8.5	8.66667	8.44444	36.24	37.6667	40.1833	38.03	2.17121	1.81632	1.83387	1.94047	41.3333	46.3333	48.1667	45.2778	380.622	419.543	448.596	416.253
33	АхС - 81	65	70	72	69	27	22	22	23.6667	63.1667	67.8333	72.7333	67.9111	9	8.33333	7.33333	8.22222	44.2133	41	39.11	41.4411	1.09707	1.97619	1.93918	1.67081	51.3333	48	46.8333	48.7222	254.087	479.01	421.78	384.959
34	АхС - 84	65	74	74	71	29	18	20	22.3333	63.5	64.8333	67.9333	65.4222	9.5	8.66667	8.4	8.85556	39.55	39.3333	38.6467	39.1767	1.12083	2.27083	2.38095	1.92421	49.3333	44.3333	43.8333	45.8333	247.93	477.764	397.723	374.473
35	АхС - 85	75	76	76	75.6667	23	20	22	21.6667	59.1667	62.3333	68.2333	63.2444	10.1667	8.33333	9.13333	9.21111	40.8533	37.6667	40.3567	39.6256	1.85759	1.16988	2.17143	1.73297	47.3333	44	45.1667	45.5	415.245	253.323	390.202	352.924
36	АхС - 87	67	78	72	72.3333	25	22	22	23	44.8333	50.3333	55.7667	50.3111	7.83333	7.66667	7.76667	7.75556	34.5967	35	38.7333	36.11	1.05128	1.92639	2.38768	1.78845	45.3333	44	46.1667	45.1667	164.196	350.448	500.83	338.491
37	АхС - 88	67	76	64	69	25	20	24	23	47.5	57.8333	55.7333	53.6889	8.5	7.66667	9.06667	8.41111	39.5567	40.3333	39.22	39.7033	0.975722	1.71921	2.14087	1.61193	49.3333	48.3333	50.5	49.3889	209.025	453.663	540.808	401.166
38	АхС - 92	69	74	68	70.3333	23	20	22	21.6667	45	53	51.5	49.8333	8.66667	8.33333	9.1	8.7	36.3933	36.3333	35.1133	35.9467	2.46528	2.01754	1.90093	2.12792	45.3333	45	51.1667	47.1667	493.008	430.491	445.943	456.481
39	АхС - 93	59	72	62	64.3333	25	20	24	23	47.1667	55	58.1667	53.4444	8.5	8.66667	8.6	8.58889	41.9033	36	35.5567	37.82	2.05347	2.54167	1.83285	2.14266	49.3333	45.6667	50.1667	48.3889	435.833	488.269	442.508	455.537
40	АхС - 96	61	72	64	65.6667	25	20	24	23	47.5	60.8333	62.6667	57	7.5	7.16667	7.46667	7.37778	40.4433	36.3333	38.1967	38.3244	1.43651	2.20807	2.01072	1.8851	43.3333	38	45	42.1111	225.716	347.62	425.809	333.048
41	АхС - 98	61	68	62	63.6667	25	24	26	25	56.8333	62.8333	71.1	63.5889	8.16667	7.16667	9.26667	8.2	46.5633	39.6667	37.9533	41.3944	1.79893	2.49246	2.1131	2.13483	45.3333	40	46.3333	43.8889	375.066	499.296	455.427	443.263
42	АхС - 99	63	68	68	66.3333	23	22	20	21.6667	55.3333	65	70.3333	63.5556	8.66667	9	8.33333	8.66667	37.7367	34.3333	34.5333	35.5344	2.11905	2.62769	2.03128	2.25934	47.3333	42.6667	45.8333	45.2778	403.892	448.439	411.349	421.227
43	АхС - 101	69	68	68	68.3333	21	20	24	21.6667	45.3333	55.3333	54.1	51.5889	7.33333	7	8.1	7.47778	38.4533	34.6667	37.9067	37.0089	1.79524	2.01299	2.1206	1.97628	45.3333	46	47.6667	46.3333	332.445	451.362	446.082	409.963
44	АхС - 102	63	68	70	67	26	20	20	22	51.3333	55.8333	59.5	55.5556	8.33333	7.5	7.5	7.77778	44.15	35.6667	36.2167	38.6778	1.55912	2.26144	2.2402	2.02025	47.3333	42.6667	46.5	45.5	453.241	424.06	457.866	445.056
45	АхС - 103	69			69	25	0	0	25	52	0	0	52	8.33333			8.33333	40.5867			40.5867	1.55509			1.55509	47.3333			47.3333	241.261			241.261
46	АхС - 104	69	68	74	70.3333	25	20	20	21.6667	44.5	62.3333	59.6667	55.5	7.16667	8	7.66667	7.61111	37.9267	36.6667	37.3433	37.3122	1.25926	2.04227	1.99677	1.7661	47.3333	43.3333	47.1667	45.9444	286.08	471.151	468.247	408.493
47	АхС - 105	67	68	72	69	23	20	20	21	52.3333	59.6667	63.5	58.5	8.33333	7.66667	7.83333	7.94444	37.3833	39.3333	39.5233	38.7467	1.32297	2.57448	2.11829	2.00524	51.3333	39.6667	45	45.3333	331.033	514.409	471.035	438.826
48	АхС - 107	61	66	66	64.3333	25	22	22	23	57.1667	71	69.8	65.9889	9.83333	8.33333	8.63333	8.93333	40.9067	40.3333	39.0259	40.0886	1.84758	2.79266	2.19935	2.27986	49.3333	39.3333	48.1667	45.6111	420.507	646.987	454.643	507.379
49	АхС - 108	61	66	66	64.3333	27	22	24	24.3333	52	59.8333	59.3333	57.0556	8	8.5	7.66667	8.05556	42.2967	37	37.3277	38.8748	1.64401	2.84259	2.35805	2.28155	45.3333	46.3333	44.1667	45.2778	442.76	633.92	420.283	498.988
50	АхС - 109	71	66	66	67.6667	23	22	24	23	38.75	65.6667	69.2	57.8722	7.25	8.33333	8	7.86111	37.685	39.6667	39.8028	39.0515	1.56169	2.53968	2.21893	2.10677	37	45.6667	48.3333	43.6667	202.871	529.256	532.897	421.675
51	АхС - 114	65	74	74	71	23	18	18	19.6667	41.8333	57.6667	67.1667	55.5556	7.5	9	8.16667	8.22222	35.7633	36	40.5333	37.4322	2.04446	3.09524	1.89899	2.34623	45.3333	45.3333	50	46.8889	347.083	535.472	527.535	470.03
52	АхС - 115	65	70	76	70.3333	23	20	20	21	45.1667	65.6667	67.1667	59.3333	8.5	8.66667	8.56667	8.57778	43.4867	39	39.1067	40.5311	2.15278	2.75323	1.90417	2.27006	47.3333	47.3333	48.5	47.7222	476.294	643.832	455.882	525.336
53	АхС - 116	73	78	78	76.3333	23	22	18	21	34.1667	59.3333	63.8667	52.4556	8.16667	7.66667	9.03333	8.28889	30.2233	33.6667	35.62	33.17	1.04167	1.6131	2.06374	1.57284	47.3333	42	48.6667	46	129.866	321.538	480.496	310.633
54	АхС - 117	71	76	78	75	25	-12	18	10.3333	49.1667	55	61	55.0556	8.16667	8	8.4	8.18889	32.4533	37.6667	38.7	36.2733	1.96111	2.31151	2.09267	2.12176	51.3333	45.6667	52.1667	49.7222	279.895	547.321	641.232	489.483
55	АхС - 119	67	76	72	71.6667	23	18	20	20.3333	48.8333	61	61.3667	57.0667	7.16667	8	8.13333	7.76667	36.1533	37.3333	36.06	36.5156	0.922794	2.41257	1.92593	1.75376	41.3333	45	48.5	44.9444	161.101	512.085	443.401	372.196
56	АхС - 120	61	68	66	65	27	20	22	23	49.3333	59.3333	57.4	55.3556	8	6.33333	8	7.44444	37.48	34.3333	36.0833	35.9656	1.42353	2.62436	2.53674	2.19488	45.3333	41.6667	49.1667	45.3889	237.636	469.446	596.802	434.628
57	АхС - 122	69	72	74	71.6667	25	20	20	21.6667	55.8333	57.1667	61.6667	58.2222	8.16667	7.83333	8.83333	8.27778	40.8633	39.3333	38.0067	39.4011	1.04525	2.23616	1.8891	1.7235	45.3333	42	46.5	44.6111	211.42	527.725	480.507	406.551
58	АхС - 125	73	74	76	74.3333	27	20	24	23.6667	53.8333	55.3333	58.4667	55.8778	9.16667	9	8.46667	8.87778	38.76	34.3333	36.7767	36.6233	1.71746	2.16575	2.59608	2.15976	45.3333	47	45.5	45.9444	369.556	505.148	484.55	453.085
59	АхС - 126	69	68	74	70.3333	25	22	20	22.3333	50.1667	56.1667	63.6667	56.6667	7.83333	7.16667	7.83333	7.61111	38.71	37.3333	37.9	37.9811	0.983838	2.56569	2.59236	2.0473	41.3333	41.3333	43.5	42.0556	194.741	539.84	524.046	419.542
60	АхС - 129	69	72	74	71.6667	25	20	20	21.6667	64.3333	60	67.5667	63.9667	8.5	8.33333	8.73333	8.52222	39.0233	38	36.3433	37.7889	0.468001	2.06389	1.95185	1.49458	45.3333	42.6667	45.5	44.5	99.7818	434.233	360.738	298.251
61	АхС - 130	69	76	74	73	25	18	20	21	43.3333	58.3333	54.9667	52.2111	7.33333	8	7.63333	7.65556	39.4333	37.6667	37.4567	38.1856	1.81751	2.44237	1.91759	2.05916	41.3333	41.3333	45.1667	42.6111	294.383	589.699	400.486	428.189
62	АхС - 132	71	72	68	70.3333	21	18	26	21.6667	45.5	52	49.6667	49.0556	8.16667	6.66667	7.8	7.54444	42.1967	40	37.43	39.8756	0.95873	2.47685	2.81111	2.08223	43.3333	41.3333	48	44.2222	180.59	529.863	555.671	422.041
63	АхС - 133	69	74	68	70.3333	25	20	24	23	52.3333	54	60.7333	55.6889	7.66667	7.66667	8	7.77778	36.87	38	38.54	37.8033	1.61389	2.58279	2.88989	2.36219	43.3333	45.3333	47.5	45.3889	276.059	555.884	548.654	460.199
64	АхС - 134	61	68	72	67	25	22	16	21	48.8333	48.8333	50.9	49.5222	8.5	7.83333	7.73333	8.02222	44.35	37.3333	36.98	39.5544	0.788986	2.41275	2.32981	1.84385	43.3333	41.6667	48.8333	44.6111	201.734	537.99	463.321	401.015
65	АхС - 135	61	74	72	69	25	20	16	20.3333	49.5	53	49.1	50.5333	8.5	7.33333	8.26667	8.03333	37.8733	35.6667	35.4833	36.3411	2.08148	2.33913	2.14392	2.18818	43.3333	44.6667	45.1667	44.3889	421.121	550.186	448.198	473.168
66	АхС - 137	67	68	72	69	17	20	16	17.6667	57.8333	56.1667	64.0667	59.3556	7.5	7.16667	7.73333	7.46667	38.2333	37.3333	36.7833	37.45	0.875	2.79966	2.45833	2.04433	43.3333	44	50.5	45.9444	152.539	616.875	549.63	439.681
67	АхС - 138	69	68	74	70.3333	25	20	20	21.6667	48.5	51.3333	54.4	51.4111	8.5	7.66667	9.23333	8.46667	35.2867	35.6667	38.4167	36.4567	1.92386	2.40179	2.39023	2.23862	47.3333	47	52.1667	48.8333	386.647	527.648	647.105	520.467
68	АхС - 139	69	68	68	68.3333	23	22	24	23	52.1667	59	61.4667	57.5444	9.5	9.33333	9.13333	9.32222	41.3033	36	39.5201	38.9411	1.89231	3.04306	2.3087	2.41469	45.3333	46.6667	48.5	46.8333	354.121	609.616	574.381	512.706
69	АхС - 140	61	68	62	63.6667	25	22	26	24.3333	61.6667	63.3333	73.5333	66.1778	9	9	10.5667	9.52222	41.97	33.3333	35.7667	37.0233	0.905093	2.22367	2.07822	1.73566	43.3333	45	47.8333	45.3889	178.708	507.089	477.609	387.802
70	АхС - 141	65	74	68	69	27	20	26	24.3333	63.1667	62	78.9333	68.0333	8.83333	9	9.73333	9.18889	39.06	32.6667	35.7733	35.8333	1.72277	2.19048	2.45556	2.12293	43.3333	44	47.8333	45.0556	320.654	462.168	512.844	431.889
71	АхС - 143	61	68	66	65	31	22	28	27	48.5	52.5	58.4333	53.1444	8.83333	7.83333	9.76667	8.81111	35.7733	33.6667	36.3867	35.2756	1.47049	2.02093	2.722	2.07114	45.3333	46.3333	49.1667	46.9444	359.671	434.679	536.806	443.719
72	АхС - 145	61	66	66	64.3333	25	22	22	23	52.5	56.3333	65.4	58.0778	8.16667	7.66667	9.33333	8.38889	36.5567	36	37.5833	36.7133	1.20106	2.25578	1.94831	1.80171	45.3333	43.3333	47.1667	45.2778	278.797	470.335	495.572	414.901
73	АхС - 146	67	70	70	69	25	20	24	23	45.1667	54.8333	52.4333	50.8111	7.83333	6.5	7.5	7.27778	33.3267	35	38.7967	35.7078	1.52802	2.67937	2.62147	2.27628	43.3333	39.6667	49.1667	44.0556	244.523	558.978	579.052	460.851
74	АхС - 147	69	76	76	73.6667	25	20	18	21	44.3333	60.3333	52.9667	52.5444	7.66667	7	8.96667	7.87778	37.44	35.3333	37.1594	36.6442	1.89461	2.2197	2.44444	2.18625	41.3333	40	48.8333	43.3889	283.36	459.13	612.605	451.698
75	АхС - 148	59	68	62	63	27	20	26	24.3333	61.1667	61.6667	69.3667	64.0667	9	7.66667	9.1	8.58889	38.9233	38.3333	38.7967	38.6844	1.69737	2.16276	2.78717	2.21577	43.3333	43.3333	45.8333	44.1667	392.099	494.632	647.367	511.366
76	АхС - 150	69	74	76	73	29	18	22	23	65.1667	65.5	75.5	68.7222	9.5	9.16667	9.03333	9.23333	36.9767	35	38.37	36.7822	1.74451	2.58596	2.62982	2.3201	47.3333	48.6667	51.8333	49.2778	378.972	596.143	665.593	546.903
77	АхС - 152	73	76	68	72.3333	23	18	28	23	46.8333	52.8333	57.4	52.3556	8.5	7.83333	8.73333	8.35556	34.7867	34	35.2433	34.6767	1.98148	2.04786	2.53261	2.18732	43.3333	45.3333	45.3333	44.6667	340.312	448.891	541.936	443.713
78	АхС - 156	69	70	72	70.3333	19	20	18	19	60.3333	56.5	62.7333	59.8556	7.83333	7.16667	7.66667	7.55556	35.5067	38.3333	38.6267	37.4889	2.2848	2.64485	2.71382	2.54782	43.3333	45	46.3333	44.8889	465.402	615.078	611.935	564.138
79	АхС - 158	75	72	70	72.3333	15	18	20	17.6667	60.5	54.3333	66.7333	60.5222	9.16667	9.66667	9.2	9.34444	37.5633	38.3333	38.5667	38.1544	1.77985	1.87807	2.06576	1.90789	45.3333	48.3333	49.5	47.7222	457.749	489.928	539.475	495.717
80	АхС - 162	69	72	66	69	23	18	28	23	54.6667	61.6667	67.2333	61.1889	7.66667	7.33333	8.36667	7.78889	42.4333	38	36.64	39.0244	1.94737	2.04762	1.84844	1.94781	42	43	48.3333	44.4444	460.13	421.671	463.346	448.382
81	АхС - 163	73	76	68	72.3333	17	18	24	19.6667	45.8333	57.3333	58.8333	54	7.83333	8	9.23333	8.35556	38.16	42.3333	39.5654	40.0196	2.24444	2.32281	1.96566	2.17764	48	46	50.1667	48.0556	467.898	575.47	581.263	541.544
82	АхС - 164	67	66	62	65	23	22	28	24.3333	55.6667	63.3333	68.1333	62.3778	9.33333	8.66667	10.3667	9.45556	43.3467	39.3333	42.0333	41.5711	1.94602	2.29458	2.02778	2.08946	44	38	46.5	42.8333	402.321	483.504	559.763	481.863
83	АхС - 165	67	76	72	71.6667	25	20	22	22.3333	53.6667	57.8333	59.4667	56.9889	9	7.5	9	8.5	40.8167	35.3333	38.8333	38.3278	2.14474	1.97126	2.15272	2.08957	42	37.6667	48.6667	42.7778	372.596	365.206	567.155	434.986
84	АхС - 166	69	68	66	67.6667	23	20	26	23	60	63.3333	70.7667	64.7	9.33333	7.66667	9.6	8.86667	40.7167	38.6667	36.4333	38.6056	1.67778	2.48636	1.62482	1.92965	44	39.6667	47.1667	43.6111	341.841	559.953	396.718	432.837
85	АхС - 167	69	68	74	70.3333	25	20	20	21.6667	47.1667	52.3333	58.8	52.7667	8.83333	7.33333	8.46667	8.21111	35.89	35.6667	39.71	37.0889	1.41414	2.31058	1.92741	1.88404	48	42.3333	48.5	46.2778	176.686	452.718	558.369	395.924
86	АхС - 168	75	70	76	73.6667	19	20	18	19	50.3333	59.5	62.6667	57.5	8	8.16667	8.76667	8.31111	36.12	35.3333	41.7133	37.7222	1.91667	2.21325	1.81169	1.98054	44	44	45.1667	44.3889	296.171	463.743	471.42	410.445
87	АхС - 170	73	66	72	70.3333	21	24	24	23	56.3333	62.5	63.9333	60.9222	9	7.83333	9.03333	8.62222	37.0267	42	40.0967	39.7078	1.01852	2.41919	1.92424	1.78732	46	44.6667	50.5	47.0556	154.866	529.333	595.226	426.475
88	АхС - 172	67	66	72	68.3333	25	22	22	23	62	65.3333	63.0667	63.4667	9.16667	7.66667	7.73333	8.18889	39.83	37.6667	39.02	38.8389	1.42892	2.76984	2.09351	2.09742	42	43.6667	46.6667	44.1111	239.19	555.217	519.861	438.089
89	АхС - 173	73	76	74	74.3333	21	20	20	20.3333	52.8333	59	56.9333	56.2556	7.5	7	7.43333	7.31111	38.01	37	37.55	37.52	0.884211	2.66111	1.84456	1.79663	52	47	50.1667	49.7222	245.057	589.848	531.511	455.472
90	АхС - 176	69	76	74	73	27	20	22	23	45.8333	54.6667	53.0667	51.1889	8.5	8	8.33333	8.27778	36.3367	35	38.1667	36.5011	1.60643	2.49043	2.39444	2.16377	46	44.6667	47.6667	46.1111	279.639	568.318	557.298	468.418
91	АхС - 186	67	66	66	66.3333	25	22	26	24.3333	47.8333	60.3333	62.4	56.8556	9.16667	8	8.66667	8.61111	35.47	36.6667	38.1933	36.7767	1.41481	2.53127	2.00566	1.98391	40	41	44.5	41.8333	185.262	466.48	501.133	384.292
92	АхС - 188	71	76	64	70.3333	21	18	28	22.3333	53	66.3333	64.3333	61.2222	8	8.33333	8.76667	8.36667	38.52	36	39.11	37.8767	1.36087	2.64187	1.88864	1.96379	46	45.3333	49	46.7778	272.042	599.979	473.278	448.433
93	АхС - 191	73	68	72	71	21	20	22	21	52.1667	55.6667	56.2	54.6778	7.16667	7	7.06667	7.07778	42.5	35.6667	37.42	38.5289	1.11594	2.57354	2.44975	2.04641	46	43	44.1667	44.3889	246.589	535.645	496.919	426.384
94	АхС - 192	73	74	72	73	21	20	22	21	45.3333	49.1667	48.6333	47.7111	8.33333	8.83333	8.3	8.48889	34.6033	35.3333	38.01	35.9822	1.30185	2.8314	1.69918	1.94414	46	44.6667	47	45.8889	271.22	599.863	428.932	433.338
95	АхС - 193	71	74	70	71.6667	21	18	24	21	45.6667	48.3333	50.7333	48.2444	7.66667	8	8.7	8.12222	35.39	36.6667	39.788	37.2816	0.921727	2.70657	2.09654	1.90828	44	45.3333	47.8333	45.7222	153.941	617.47	538.673	436.694
96	АхС - 194	65	66	66	65.6667	27	22	28	25.6667	52.6667	62	61.2667	58.6444	8.66667	9	8.43333	8.7	35.97	36	36.98	36.3167	2.09273	3.81667	2.14583	2.68508	44	43.3333	47.3333	44.8889	368.463	707.005	413.432	496.3
97	АхС - 195	61	66	64	63.6667	31	22	30	27.6667	60.8333	63.6667	74.8667	66.4556	9.16667	8.66667	9.2	9.01111	40.5433	38	37.9067	38.8167	2.33889	2.75537	2.03156	2.37527	44	43.6667	47.6667	45.1111	456.688	577.192	472.153	502.011
98	АхС - 196	61	68	62	63.6667	31	20	30	27	47.8333	57	48.6667	51.1667	8.16667	7.33333	7.66667	7.72222	41.3767	34.3333	36.7703	37.4934	1.03472	2.71611	2.58704	2.11262	46	39.3333	46.3333	43.8889	208.623	492.66	494.784	398.689
99	АхС - 200	67	68	72	69	25	20	20	21.6667	64	69.6667	67.6667	67.1111	9.5	9	9.33333	9.27778	38.1933	35.3333	38.6633	37.3967	1.83246	2.66789	1.94921	2.14985	44	39.3333	46.6667	43.3333	390.199	468.86	490.594	449.884
100	АхС - 203	61	66	70	65.6667	29	22	20	23.6667	60.5	71.6667	78.5	70.2222	9.16667	8.83333	9.83333	9.27778	39	33.3333	36.5667	36.3	1.90079	2.39772	2.31232	2.20361	46	37.6667	47.6667	43.7778	318.091	424.004	579.554	440.549
101	АхС - 205	69	68	64	67	23	20	28	23.6667	38.8333	54.3333	58.1667	50.4444	7.5	8.33333	9.5	8.44444	44.46	39.6667	38.4333	40.8533	1.18889	2.10715	2.35229	1.88278	40	37.6667	49.8333	42.5	128.768	459.965	643.72	410.818

## Sheet: Karabalyk 2013-2015
		Heading time (days)				Seed maturation time (days)				Plant height (cm)				Spike length (cm)				Productive tillerring (pcs)				Number of kernels per main spike (pcs)				Thousand kernal/grain weight (g)				Yield per square meter (g)
№ п/п	DHL	2013	2014	2015	Average	2013	2014	2015	Average	2013	2014	2015	Average	2013	2014	2015	Average	2013	2014	2015	Average	2013	2014	2015	Average	2013	2014	2015	Average	2013	2014	2015	Average
1	АхС - 1	52	61	60	57.6667	46	47	48	47	52.9333	53.6667	60.5333	55.7111	6.26667	6.33333	6.86667	6.48889	1.86667	2.13333	1.8	1.93333	14.3333	16	16.3333	15.5556	33.2	34.0667	34.0333	33.7667	328.135	358.756	314.369	333.753
2	АхС - 2	52	61	60	57.6667	46	47	49	47.3333	53.3	58.9667	56.9333	56.4	5.63333	6.3	6.26667	6.06667	1.8	1.6	2.2	1.86667	21	12.3333	15.6667	16.3333	37.8	32.2667	29.2333	33.1	390.839	274.165	324.901	329.968
3	АхС - 6	52	61		56.5	44	53	0	48.5	63.7	63.7	0	63.7	6.03333	6.03333		6.03333	2.33333	2.33333		2.33333	21.6667	21.6667		21.6667	36.9667	34.3333		35.65	623.611	566.512		595.061
4	АхС - 7	52	61		56.5	44	54	0	49	49.4	49.4	0	49.4	5.73333	5.73333		5.73333	2.33333	2.33333		2.33333	17.6667	17.6667		17.6667	36.2	33.8		35	561.952	522.247		542.1
5	АхС - 8	54	63	62	59.6667	44	53	48	48.3333	50.6333	50.6333	52.7	51.3222	5.96667	5.96667	6.03333	5.98889	2.86667	2.86667	2.86667	2.86667	13	13	13	13	34.5	34.5	29.6333	32.8778	345.086	345.086	295.63	328.601
6	АхС - 16	50	59	58	55.6667	42	56	53	50.3333	51.0333	51.0333	58.7	53.5889	5.7	5.7	5.7	5.7	2.6	2.6	2.6	2.6	17.6667	17.6667	16	17.1111	34.8333	34.8333	33.5667	34.4111	491.619	491.619	433.082	472.107
7	АхС - 17	51	60	59	56.6667	38	57	49	48	56.4333	56.4333	50.1	54.3222	6.1	6.1	6.1	6.1	2.46667	2.46667	2.46667	2.46667	18.6667	18.6667	12.3333	16.5556	37.5333	28.9333	28.9333	31.8	608.104	464.366	342.065	471.512
8	АхС - 18	50	59		54.5	45	57		51	59.6333	59.6333		59.6333	5.96667	5.96667		5.96667	1.93333	1.93333		1.93333	14	14		14	35.6333	29.6333		32.6333	310.691	262.573		286.632
9	АхС - 19	51	60		55.5	41	58		49.5	57.3333	57.3333		57.3333	6.66667	6.66667		6.66667	1.8	1.8		1.8	16.3333	16.3333		16.3333	36.7667	29.6333		33.2	329.106	316.856		322.981
10	АхС - 21	52	61		56.5	41	55		48	51.1667	52.8333		52	6.16667	6.16667		6.16667	2.46667	1.86667		2.16667	15.6667	15.6667		15.6667	38.5	33.5667		36.0333	513.352	273.287		393.319
11	АхС - 22	52	61	59	57.3333	42	53	50	48.3333	59.8	54.8	59.8	58.1333	7.13333	7.13333	7.13333	7.13333	2.26667	1.8	2.2	2.08889	16.6667	16.6667	17.3333	16.8889	38.4	30.7	30.7	33.2667	618.972	341.577	384.161	448.237
12	АхС - 23	51	60	60	57	44	55	51	50	56.5333	59.2667	70	61.9333	6.53333	6.26667	6.33333	6.37778	1.86667	2.2	2.13333	2.06667	14.3333	14.3333	14.3333	14.3333	37.8	30.3333	32.7333	33.6222	339.949	304.379	320.982	321.77
13	АхС - 24	51	59	60	56.6667	42	58	50	50	49.7667	49.6333	44.6333	48.0111	5.76667	5.63333	6.3	5.9	2.6	2.6	2.8	2.66667	13.3333	21	21	18.4444	37.3667	33	28.7333	33.0333	406.473	499.01	491.041	465.508
14	АхС - 27	52	61	62	58.3333	42	57	50	49.6667	53.7667	54.8333	54.6333	54.4111	6.43333	6.16667	5.96667	6.18889	2.2	2.2	2.2	2.2	14.6667	20	20.6667	18.4444	37.2333	28.5667	28	31.2667	573.993	603.493	584.747	587.411
15	АхС - 41	49	58	57	54.6667	46	58	53	52.3333	62.8667	45.2	52.6667	53.5778	6.86667	6.86667	6	6.57778	2.4	2.4	2.4	2.4	17.3333	17.3333	16.6667	17.1111	36.6333	32.7333	34.3	34.5556	570.678	502.379	514.662	529.239
16	АхС - 42	53	62	61	58.6667	44	54	49	49	58.2667	58.2667	52.8333	56.4556	6.26667	6.26667	4.5	5.67778	2.2	2.2	2.26667	2.22222	21	21	21	21	38.1333	28.7333	29.5667	32.1444	506.575	379.642	415.461	433.893
17	АхС - 43	52	61	60	57.6667	45	55	48	49.3333	56.0333	56.0333	49.2	53.7556	6.03333	6.03333	4.86667	5.64444	2.13333	2.13333	2.26667	2.17778	16	18.3333	18.3333	17.5556	36.4333	28	35.2667	33.2333	560.639	541.961	658.51	587.036
18	АхС - 44	52	61	60	57.6667	41	58	48	49	53.3333	53.3333	61.6667	56.1111	6.66667	6.66667	6.66667	6.66667	2.13333	2.8	2.6	2.51111	12.3333	20.6667	17.3333	16.7778	38.6667	29.7	29.7	32.6889	344.861	587.398	464.425	465.562
19	АхС - 46	51	60	60	57	43	57	52	50.6667	54.3333	54.3333	52.5333	53.7333	6	6	5.2	5.73333	1.6	1.73333	1.73333	1.68889	15.6667	17.3333	18.6667	17.2222	36.2667	34.3	28.8667	33.1444	421.055	473.418	431.404	441.959
20	АхС - 52	50	59	59	56	43	57	51	50.3333	54.8333	54.8333	56.6667	55.4444	4.5	4.5	6.33333	5.11111	2.53333	2.53333	2.53333	2.53333	16.6667	16.6667	12	15.1111	38.4667	29.5667	27.2667	31.7667	736.445	567.795	372.237	558.825
21	АхС - 53	51	60	60	57	45	55	49	49.6667	49.2	49.2	61	53.1333	4.86667	4.86667	6	5.24444	2.26667	2.26667	2.33333	2.28889	13	13	13	13	37.8	35.2667	33.5	35.5222	492.645	460.207	329.103	427.318
22	АхС - 54	51	60	60	57	44	58	48	50	61.9333	61.9333	59.6	61.1556	6.93333	6.93333	6.93333	6.93333	2.26667	2.26667	2.2	2.24444	17.3333	17.3333	14.6667	16.4444	35.7333	32.8	32.8	33.7778	504.414	495.576	364.812	454.934
23	АхС - 55	52	61	62	58.3333	41	56	48	48.3333	52.5333	52.5333	54.8	53.2889	5.2	5.2	6.13333	5.51111	2.6	2.6	2.6	2.6	18.6667	18.6667	23.6667	20.3333	38.5667	28.8667	27.6	31.6778	725.154	539.258	772.14	678.851
24	АхС - 58	53	62	58	57.6667	44	55	53	50.6667	59	59	59.5667	59.1889	6.33333	6.33333	6.9	6.52222	2	2	2	2	18.3333	12	12.6667	14.3333	39.4	27.2667	26.1	30.9222	527.852	193.42	277.518	332.93
25	АхС - 62	51	60	59	56.6667	46	58	49	51	61.3	61	49.6	57.3	6.3	6	4.93333	5.74444	2	2	2	2	20.6667	22	22	21.5556	35.3667	33.5	28.1	32.3222	586.934	549.672	484.52	540.375
26	АхС - 65	51	60	59	56.6667	47	57	49	51	59.9	58.3667	65.0333	61.1	7.23333	5.7	5.7	6.21111	2.33333	2.33333	1.66667	2.11111	17.3333	12	12	13.7778	37.6667	31.2333	31.2333	33.3778	575.357	388.783	240.575	401.572
27	АхС - 70	52	61	60	57.6667	40	55	50	48.3333	54.8	54.8	49.8333	53.1444	6.13333	6.13333	5.83333	6.03333	2.2	2.2	2.66667	2.35556	14.6667	14.6667	11.3333	13.5556	37.5333	28.6667	28.6667	31.6222	428.133	331.156	328.548	362.612
28	АхС - 71	54	63	62	59.6667	42	54	47	47.6667	70.5667	55.9	54.7333	60.4	6.9	6.9	5.73333	6.51111	2.8	2.6	2.53333	2.64444	23.6667	23.6667	16.3333	21.2222	35.5667	27.6	28.1	30.4222	912.406	652.228	506.124	690.253
29	АхС - 73	52	61	60	57.6667	45	57	48	50	43.2667	49.6	60.3	51.0556	4.93333	4.93333	6.3	5.38889	1.73333	2.13333	2.13333	2	12.6667	12.6667	21.3333	15.5556	36.9	26.1	27	30	288.038	245.164	489.412	340.872
30	АхС - 74	52	61	60	57.6667	46	56	49	50.3333	66.1667	66.1667	52.1667	61.5	6.83333	6.83333	6.83333	6.83333	2.06667	2.06667	2.06667	2.06667	20	20	20	20	38.4333	28.1	30.4	32.3111	556.545	407.184	488.869	484.199
31	АхС - 79	51	60	59	56.6667	45	56	49	50	49.8333	49.8333	52.3333	50.6667	5.83333	5.83333	6.66667	6.11111	1.66667	1.66667	2.93333	2.08889	11.3333	11.3333	12.6667	11.7778	39.4	27.6667	27.6667	31.5778	286.351	200.215	431.182	305.916
32	АхС - 80	52	61	60	57.6667	44	59	49	50.6667	60.7333	60.7333	61.2333	60.9	5.73333	5.73333	6.23333	5.9	2.66667	2.66667	2.8	2.71111	16.3333	16.3333	14	15.5556	35.8333	28.1	30.7333	31.5556	683.469	543.345	521.444	582.752
33	АхС - 81	52	61	60	57.6667	43	58	48	49.6667	60.3	60.3	49.2667	56.6222	6.3	6.3	5.26667	5.95556	2.53333	2.53333	2.2	2.42222	21.3333	21.3333	11.6667	18.1111	36.1	27	27.7	30.2667	690.178	519.454	255.444	488.359
34	АхС - 84	51	60	59	56.6667	42	57	51	50	51.2667	51.2667	55.6	52.7111	5.93333	5.93333	5.93333	5.93333	2.2	2.2	2.2	2.2	12	12	12	12	35.2667	30.4	35.9333	33.8667	413.019	289.793	343.296	348.703
35	АхС - 85	51	60	59	56.6667	38	60	52	50	52.3333	52.3333	53.7333	52.8	6.66667	6.66667	5.73333	6.35556	2.86667	2.86667	2.86667	2.86667	12.6667	12.6667	12	12.4444	35.4	32.2667	32.2667	33.3111	453.912	429.343	403.538	428.931
36	АхС - 87	52	61	60	57.6667	43	58	48	49.6667	50.2333	50.2333	50.2333	50.2333	6.23333	6.23333	6.23333	6.23333	2.93333	2.93333	2.2	2.68889	14	14	22	16.6667	38.2667	30.7333	30.5333	33.1778	509.519	402.472	479.111	463.701
37	АхС - 88	54	63	62	59.6667	44	57	46	49	50	49.2667	46.5	48.5889	6	5.26667	6.5	5.92222	2.8	2.8	2.56667	2.72222	11.6667	11.6667	12	11.7778	36.5333	27.7	30.1667	31.4667	387.702	301.283	346.912	345.299
38	АхС - 92	53	62	61	58.6667	41	57	48	48.6667	55.3667	54.9333	52.9333	54.4111	5.7	5.26667	5.26667	5.41111	2.2	2.2	2.36667	2.25556	15.3333	15.3333	15.3333	15.3333	38.1333	35.9333	33.1333	35.7333	450.015	430.662	372.013	417.563
39	АхС - 93	53	61	60	58	42	54	50	48.6667	53.7333	53.7333	53.9	53.7889	5.73333	5.73333	5.9	5.78889	2.46667	2.46667	2.46667	2.46667	11	11	11	11	37.9	29.6667	29.6667	32.4111	338.224	264.669	259.776	287.557
40	АхС - 96	53	62	61	58.6667	41	56	50	49	48.2333	55.5667	55.6333	53.1444	6.23333	6.23333	6.3	6.25556	2	2	2	2	12	12	11	11.6667	39.6	30.5333	34.6	34.9111	321.962	248.13	253.26	274.451
41	АхС - 98	53	62	61	58.6667	40	55	47	47.3333	56.8333	46.5	45.2333	49.5222	6.5	6.5	5.23333	6.07778	2.2	2.2	2.26667	2.22222	22	22	10.6667	18.2222	32.0333	30.1667	34.9333	32.3778	595.067	561.042	323.776	493.295
42	АхС - 99	52	61	60	57.6667	40	56	49	48.3333	50.2333	53.5667	53.5667	52.4556	5.56667	5.56667	5.56667	5.56667	2.56667	2.56667	1.93333	2.35556	12	12	14.6667	12.8889	37.3667	33.1333	33.3333	34.6111	465.516	415.64	394.615	425.257
43	АхС - 101	53	62	61	58.6667	41	55	49	48.3333	50.9667	50.9667	54.2333	52.0556	6.3	6.3	5.9	6.16667	2.6	1.8	1.8	2.06667	15	15	15	15	38.3333	34.6	32.6667	35.2	527.578	345.136	322.547	398.42
44	АхС - 102	52	61	60	57.6667	41	54	48	47.6667	53.9	53.9	56.9333	54.9111	5.23333	5.23333	6.26667	5.57778	2.13333	2.26667	1.93333	2.11111	11	11	16	12.6667	36.5667	34.9333	32.6667	34.7222	298.055	313.708	382.791	331.518
45	АхС - 103	51	60	59	56.6667	41	60	49	50	60.2667	60.2667	59.5333	60.0222	6.26667	6.26667	5.53333	6.02222	1.93333	1.93333	2	1.95556	12	12	12	12	35.3667	32.6667	32.5667	33.5333	255.489	235.468	242.47	244.476
46	АхС - 104	54	63	62	59.6667	39	56	46	47	48.9	48.9	46.5667	48.1222	5.9	5.9	5.9	5.9	2.3	2.3	2.33333	2.31111	16	16	12.3333	14.7778	38.8667	28.6	33.5333	33.6667	485.585	357.35	357.131	400.022
47	АхС - 105	52	61	60	57.6667	42	56	52	50	58.4667	58.4667	53.8	56.9111	5.46667	5.46667	5.8	5.57778	2.06667	2.06667	2.2	2.11111	13.6667	13.6667	12.6667	13.3333	37	27.8333	27.8333	30.8889	370.037	277.241	283.429	310.235
48	АхС - 107	50	59	58	55.6667	42	61	52	51.6667	54.8	45.8	49.2667	49.9556	5.46667	5.46667	5.6	5.51111	2.1	2.1	2.1	2.1	16.6667	16.6667	12.6667	15.3333	38.2	31.0333	30.6	33.2778	520.534	415.365	283.919	406.606
49	АхС - 108	54	63	61	59.3333	38	56	48	47.3333	45.5333	60.2	60.0667	55.2667	5.53333	5.53333	5.4	5.48889	2.46667	2.46667	2.46667	2.46667	12	15.3333	15.3333	14.2222	34.2333	32.5667	31.6333	32.8111	363.407	444.141	337.522	381.69
50	АхС - 109	53	62	63	59.3333	41	58	45	48	53	45.6667	55	51.2222	5	5	5	5	2	2	3	2.33333	11.6667	12.3333	15.3333	13.1111	35.6333	33.5333	35.0667	34.7444	308.138	355.461	605.342	422.98
51	АхС - 114	54	63	62	59.6667	41	56	48	48.3333	53.8	53.8	61.6667	56.4222	5.8	5.8	6.66667	6.08889	2.33333	2.33333	2.53333	2.4	18	12.6667	12.3333	14.3333	37.3667	30.6667	30.6667	32.9	643.153	366.832	371.232	460.405
52	АхС - 115	52	61	62	58.3333	42	53	49	48	49.2667	49.2667	56.4667	51.6667	5.6	5.6	5.46667	5.55556	2.2	2.2	2.33333	2.24444	12.6667	12.6667	10	11.7778	37.8667	30.6	33.5	33.9889	443.542	360.044	323.609	375.731
53	АхС - 116	53	62	62	59	45	53	46	48	52.9333	53.0667	53.8	53.2667	5.26667	5.4	6.13333	5.6	2.36667	2.36667	2.36667	2.36667	15	15	15	15	40.0667	31.6333	32.8	34.8333	538.54	430.073	440.793	469.802
54	АхС - 117	52	61	60	57.6667	45	59	48	50.6667	55.2667	55.9333	46.2667	52.4889	5.26667	5.93333	5.93333	5.71111	1.8	1.8	1.8	1.8	12.6667	12.6667	12.6667	12.6667	39	35.0667	33.3333	35.8	300.089	272.828	259.022	277.313
55	АхС - 119	52	61	60	57.6667	43	58	49	50	61.6667	61.6667	47.6667	57	6.66667	6.66667	6	6.44444	3	3	2.33333	2.77778	10.6667	10.6667	10.6667	10.6667	35.3667	32.6667	32.6667	33.5667	413.791	380.135	306.569	366.831
56	АхС - 120	53	62	61	58.6667	43	58	49	50	56.4667	56.4667	49.9333	54.2889	5.46667	5.46667	5.6	5.51111	1.8	2.53333	2.23333	2.18889	15.3333	15.3333	10.6667	13.7778	36.3	33.3667	33.3667	34.3444	382.145	475.468	288.008	381.874
57	АхС - 122	52	61	60	57.6667	42	58	51	50.3333	51.1333	51.1333	50.8	51.0222	6.13333	6.13333	5.8	6.02222	2.26667	2.33333	1.93333	2.17778	12.3333	12.3333	11	11.8889	37.8667	33.5	34.1333	35.1667	365.753	341.849	253.107	320.236
58	АхС - 125	52	61	60	57.6667	44	56	48	49.3333	46.1667	46.1667	47.5	46.6111	5.83333	5.83333	5.83333	5.83333	2.26667	2.26667	2.26667	2.26667	12.6667	10	13.6667	12.1111	36.1667	32.8	35.3	34.7556	428.994	310.519	481.262	406.925
59	АхС - 126	53	62	61	58.6667	42	58	48	49.3333	60.6667	47.6667	50.8333	53.0556	6	6	5.83333	5.94444	1.6	1.6	1.6	1.6	14.6667	11.6667	11.6667	12.6667	35.9667	33.3333	34.4333	34.5778	313.151	208.723	228.686	250.187
60	АхС - 129	52	61	61	58	43	58	50	50.3333	46.2667	49.9333	56.0667	50.7556	5.6	5.6	5.73333	5.64444	2.33333	2.33333	2.33333	2.33333	11	11.3333	11.3333	11.2222	36.3667	34.8333	34.8333	35.3444	329.268	335.252	366.668	343.729
61	АхС - 130	51	60	62	57.6667	43	60	48	50.3333	52.8	52.8	52.9333	52.8444	5.8	5.8	5.93333	5.84444	2.33333	2.33333	2	2.22222	10.6667	10.6667	17.6667	13	36.1333	34.7333	34.7333	35.2	399.513	383.049	429.553	404.039
62	АхС - 132	52	61	60	57.6667	46	58	49	51	47.1667	47.1667	50.5	48.2778	5.5	5.5	5.5	5.5	2.23333	2.23333	2	2.15556	11	11	10.3333	10.7778	34.1333	34.1333	30.8333	33.0333	341.358	341.358	257.405	313.374
63	АхС - 133	53	62	61	58.6667	43	56	48	49	50.8333	50.8333	53.4333	51.7	5.83333	5.83333	6.1	5.92222	1.93333	1.93333	2.2	2.02222	13.6667	13.6667	11.6667	13	36.3	35.3	28.3333	33.3111	376.373	377.991	277.974	344.112
64	АхС - 134	53	62	61	58.6667	39	58	49	48.6667	56.0667	56.0667	55.2333	55.7889	5.73333	5.73333	6.23333	5.9	1.66667	1.66667	1.66667	1.66667	14	14	14	14	35.2	34.4333	29.6	33.0778	310.697	304.204	261.953	292.285
65	АхС - 135	54	63	62	59.6667	38	56	48	47.3333	50.2667	50.2667	50.5	50.3444	5.93333	5.93333	6.16667	6.01111	2	2	2.46667	2.15556	18	18	18	18	33.5333	34.6	34.6	34.2444	530.845	462.846	611.618	535.103
66	АхС - 137	55	64	63	60.6667	38	54	45	45.6667	50.5333	50.5333	54.2	51.7556	5.53333	5.53333	5.53333	5.53333	2	2	2	2	17.6667	17.6667	11	15.4444	33.5	30.8333	33	32.4444	533.298	478.821	306.447	439.522
67	АхС - 138	53	62	61	58.6667	38	55	47	46.6667	53.4333	53.4333	48.7	51.8556	6.1	6.1	5.36667	5.85556	2.2	2.2	2.13333	2.17778	10.3333	10.3333	17	12.5556	38.2667	28.3333	34.9333	33.8444	343.192	253.154	565.895	387.414
68	АхС - 139	54	63	62	59.6667	41	53	48	47.3333	54.4	55.2333	55.5	55.0444	5.4	6.23333	5.16667	5.6	2.1	2.1	2.1	2.1	11.6667	11.6667	11.6667	11.6667	34.8667	29.6	28.1667	30.8778	334.023	286.912	271.433	297.456
69	АхС - 140	54	63	62	59.6667	44	57	48	49.6667	49.2667	49.5	48.6	49.1222	5.93333	6.16667	5.26667	5.78889	1.93333	1.93333	1.93333	1.93333	18	18	18	18	37.7333	31.3333	31.3333	33.4667	541.757	443.722	443.722	476.4
70	АхС - 141	53	62	61	58.6667	45	57	48	50	55.3	55.3	62.3	57.6333	6.63333	6.63333	6.63333	6.63333	2.46667	2.46667	2.2	2.37778	13.3333	13.3333	13.3333	13.3333	38.9333	28.8667	28.8667	32.2222	395.371	293.294	263.408	317.358
71	АхС - 143	53	62	61	58.6667	45	55	47	49	48.7	48.7	51.7667	49.7222	5.36667	5.36667	7.1	5.94444	2.53333	2	2.73333	2.42222	10	11	12.5	11.1667	35.3	32.2333	32.2333	33.2556	325.41	247.303	935.964	502.893
72	АхС - 145	55	64	63	60.6667	43	56	45	48	46.8333	55.5	53.5	51.9444	5.16667	5.16667	6.16667	5.5	2.33333	2.13333	1.8	2.08889	11.6667	17	12.5	13.7222	34.1667	33	32.8333	33.3333	299.181	451.401	356.17	368.917
73	АхС - 146	54	63	62	59.6667	44	56	47	49	49.6	55.2667	56.4667	53.7778	5.26667	5.26667	6.46667	5.66667	2	2	2	2	11.3333	11.6667	11.6667	11.5556	34.7	34.9333	31.6	33.7444	265.864	251.652	246.876	254.797
74	АхС - 147	54	63	62	59.6667	40	57	48	48.3333	60.9667	54.3	54.3	56.5222	6.96667	6.96667	6.96667	6.96667	2.53333	2.53333	2.53333	2.53333	15.3333	15.3333	19.3333	16.6667	37.1	28.1667	30.7333	32	547.459	411.293	534.305	497.686
75	АхС - 148	54	63	62	59.6667	42	52	49	47.6667	62.7667	62.7667	54.4667	60	7.1	7.1	6.8	7	2.4	2.4	2.4	2.4	24.3333	12.5	10.6667	15.8333	35.8333	32.2667	32.2667	33.4556	752.979	359.618	321.829	478.142
76	АхС - 150	52	61	60	57.6667	40	58	48	48.6667	50.8333	50.8333	55.0667	52.2444	6.16667	6.16667	6.73333	6.35556	2.2	2.2	2.2	2.2	15	12.5	15.3333	14.2778	34.0333	29.3	29.3	30.8778	442.76	293.846	346.096	360.901
77	АхС - 152	53	62	61	58.6667	44	58	48	50	53.8	53.8	58.2	55.2667	6.46667	6.46667	5.86667	6.26667	2.73333	2.73333	2.06667	2.51111	11.6667	11.6667	12.6667	12	37.7	32.8333	28.8667	33.1333	481.233	303.911	248.254	344.466
78	АхС - 156	53	62	61	58.6667	43	57	47	49	57.0333	57.0333	57.0333	57.0333	7.03333	7.03333	7.03333	7.03333	1.8	1.8	1.66667	1.75556	19.3333	19.3333	19.3333	19.3333	36.7	31.6	31.0333	33.1111	460.086	401.728	407.003	422.939
79	АхС - 158	54	63	62	59.6667	42	54	48	48	56.3	56.3	56.3	56.3	5.96667	5.96667	5.96667	5.96667	1.86667	1.86667	1.86667	1.86667	18.6667	18.6667	18.6667	18.6667	36.5667	30.7333	28.5667	31.9556	399.88	338.474	377.617	371.99
80	АхС - 162	53	62	61	58.6667	41	58	47	48.6667	54.4667	54.4667	52.8667	53.9333	6.8	6.8	6.53333	6.71111	2.66667	2.66667	2.66667	2.66667	12.6667	12.6667	12.6667	12.6667	37.5	35	35	35.8333	473.689	439.482	439.482	450.885
81	АхС - 163	54	63	62	59.6667	40	56	46	47.3333	55.0667	55.0667	52.2667	54.1333	6.73333	6.73333	5.93333	6.46667	2.2	2.2	2.86667	2.42222	10.6667	10.6667	16	12.4444	38.0333	28.8667	28.4667	31.7889	253.449	191.735	377.901	274.362
82	АхС - 164	54	63	62	59.6667	42	57	46	48.3333	58.2	58.2	57.6333	58.0111	5.86667	5.86667	5.63333	5.78889	2.06667	2.06667	1.93333	2.02222	15.3333	15.3333	10.6667	13.7778	38.3333	31.0333	27.3667	32.2444	381.769	316.722	177.89	292.127
83	АхС - 165	53	62	61	58.6667	41	57	48	48.6667	59.9	59.9667	59.9667	59.9444	6.23333	6.3	6.3	6.27778	1.66667	1.66667	2.2	1.84444	12.6667	12.6667	11	12.1111	37.5	28.5667	29.0667	31.7111	214.191	162.617	187.619	188.142
84	АхС - 166	51	60	59	56.6667	44	58	51	51	52.5	52.1667	51.8333	52.1667	6.16667	5.83333	5.83333	5.94444	2.06667	2.06667	2.06667	2.06667	12.3333	12.3333	12.3333	12.3333	38.5667	33.1333	33.1333	34.9444	322.776	274.56	274.56	290.632
85	АхС - 167	53	62	61	58.6667	39	56	50	48.3333	52.8667	52.8667	49.8	51.8444	6.53333	6.53333	5.46667	6.17778	1.53333	1.53333	1.53333	1.53333	20	20	20	20	37.2	28.4667	32.5333	32.7333	363.877	278.191	318.615	320.227
86	АхС - 168	55	64	63	60.6667	38	53	45	45.3333	57.9333	57.9333	54.7	56.8556	5.93333	5.93333	7.03333	6.3	2.86667	2.86667	2.2	2.64444	16	16	10.3333	14.1111	35.1333	27.3667	34.7	32.4	623.636	490.491	325.808	479.979
87	АхС - 170	51	60	59	56.6667	45	57	50	50.6667	53.9667	53.9667	54.0333	53.9889	5.63333	5.63333	5.7	5.65556	1.93333	1.93333	2.26667	2.04444	10.6667	10.6667	11.6667	11	38.4667	29.0667	33.8667	33.8	310.773	233.732	329.582	291.362
88	АхС - 172	52	61	60	57.6667	43	57	51	50.3333	48.5333	48.5333	48.5333	48.5333	4.86667	4.86667	4.86667	4.86667	2	2.2	2.6	2.26667	11	11	13.6667	11.8889	35.9667	27.1	27.1	30.0556	292.945	220.262	342.572	285.259
89	АхС - 173	53	62	61	58.6667	41	55	49	48.3333	51.4667	51.4667	53.2	52.0444	5.46667	5.46667	5.86667	5.6	2.13333	1.6	1.6	1.77778	11	10.6667	10.6667	10.7778	36.4	31.0667	31.0667	32.8444	292.628	168.566	168.566	209.92
90	АхС - 176	53	62	61	58.6667	39	54	49	47.3333	59.3667	51.3667	53	54.5778	7.03333	7.03333	5.66667	6.57778	2.2	2.2	2.2	2.2	17	10.3333	10.3333	12.5556	34.0667	32.5333	28.4667	31.6889	345.822	273.063	239.512	286.132
91	АхС - 186	53	62	61	58.6667	41	55	47	47.6667	54.0333	54.0333	53.2667	53.7778	6.7	6.7	6.6	6.66667	2.1	2.1	2.1	2.1	12.3333	12.3333	13.3333	12.6667	38.1667	28.4667	28.9667	31.8667	287.39	212.298	234.447	244.712
92	АхС - 188	54	63	62	59.6667	38	57	46	47	66.0333	66.0333	60.0333	64.0333	7.03333	7.03333	7.03333	7.03333	2.4	2.4	2.06667	2.28889	13.3333	13.3333	10.6667	12.4444	36.1	28.7667	35.3	33.3889	397.723	317.265	270.991	328.66
93	АхС - 191	53	62	61	58.6667	39	57	48	48	46.3333	46.3333	46.9333	46.5333	5.66667	5.66667	6.26667	5.86667	2.13333	2.13333	2.26667	2.17778	13	13	13	13	34.4333	32.5	32.4333	33.1222	292.297	276.005	301.746	290.016
94	АхС - 192	53	62	61	58.6667	41	58	49	49.3333	47.2	47.2	54.8667	49.7556	5.2	5.2	6.86667	5.75556	2.26667	2.26667	2.86667	2.46667	10.6667	10.6667	10.6667	10.6667	37.7	32.0333	32.0333	33.9222	314.489	268.118	335.286	305.964
95	АхС - 193	54	63	62	59.6667	43	57	47	49	53.2667	53.2667	58.4333	54.9889	6.6	6.6	6.76667	6.65556	2.93333	2.93333	2.93333	2.93333	16.3333	16.3333	19	17.2222	36.9667	33.1	33.1	34.3889	604.157	543.736	961.716	703.203
96	АхС - 194	54	63	62	59.6667	44	56	46	48.6667	59.6	59.6	62.6	60.6	6.6	6.6	6.6	6.6	2.23333	2.23333	2.23333	2.23333	13.3333	13.3333	10.5	12.3889	38.5333	32.8667	32.8667	34.7556	387.803	330.353	606.521	441.559
97	АхС - 195	51	60	59	56.6667	45	58	51	51.3333	49.3667	49.3667	49.3667	49.3667	4.7	4.7	4.7	4.7	2.06667	2.06667	2.2	2.11111	10.6667	10.6667	10.6667	10.6667	36.5667	28.9667	30.6667	32.0667	349.404	278.21	309.457	312.357
98	АхС - 196	53	62	61	58.6667	44	58	50	50.6667	54.2667	54.2667	53.9	54.1444	6.26667	6.26667	5.9	6.14444	2.26667	2.26667	2.06667	2.2	10.3333	10.3333	14.6667	11.7778	38.2667	35.3	33.5	35.6889	398.902	360.296	466.311	408.503
99	АхС - 200	53	62	61	58.6667	40	57	47	48	62.7667	62.7667	61.7333	62.4222	6.76667	6.76667	5.73333	6.42222	2.33333	2.33333	2.33333	2.33333	19	19	19	19	39.6667	33.0667	33.0667	35.2667	1180.75	504.792	855.907	847.151
100	АхС - 203	52	61	54	55.6667	42	59	55	52	50.2333	50.2333	50.0333	50.1667	5.9	5.9	5.7	5.83333	2	2	2	2	10.5	10.5	21.6667	14.2222	34.5333	34.0333	34.0667	34.2111	626.208	244.503	513.658	461.456
101	АхС - 205	54	63	61	59.3333	40	56	47	47.6667	53.9667	60.8333	59.1	57.9667	6.3	5.83333	6.1	6.07778	2.2	2.2	2.33333	2.24444	12.5	10.6667	17.6667	13.6111	35.5667	29.2333	32.2667	32.3556	633.749	272.595	426.498	444.281
