# Supplementary material for: QTL mapping of agronomic traits in wheat using the UK Avalon × Cadenza reference mapping population grown in Kazakhstan
Source: PeerJ. 2021 Feb 18;9:e10733. doi: 10.7717/peerj.10733 (PMC7897413; doi:10.7717/peerj.10733)
Supplement: Supplemental Information 7 [file peerj-09-10733-s007.xlsx]

## Sheet: First List
Title: Meteorological data in three different wheat-growing regions of Kazakhstan (2013-2020)
*Data for each experimental site is presented in separate lists

## Sheet: Karabalyk 2013-2020 
Meteo data from 2015-2020 years for North Kazakhstan (Karabalyk Agricultural Experimental Station)
2013
May					June					July					August					September
Days	Temperature, °C			Rainfall, mm	Days	Temperature, °C			Rainfall, mm	Days	Temperature, °C			Rainfall, mm	Days	Temperature, °C			Rainfall, mm	Days	Temperature, °C			Rainfall, mm
	average	max	min			average	max	min			average	max	min			average	max	min			average	max	min
1	8	14.5	1.8		1	20.3	20,6	7,7		1	14	20,9	6,6		1	19.7	25,3	17,4	12	1	20.7	26,4	12,0
2	9.7	13.6	6.9	0.3	2	17	22,1	4,3		2	13.7	20,4	10,0	1.2	2	19.3	25,2	17,1	9	2	20.7	27,4	12,2
3	11.3	14.5	4.5		3	16.3	20,6	8,0		3	14	20,3	11,5	3	3	19.7	25,2	16,8	5.5	3	18.7	25,7	13,3
4	15	19.8	5.4		4	16.7	19,7	5,0		4	17.7	23,4	13,2	6.3	4	22	26,3	18,2		4	17	23,0	10,4	3
5	15	16.7	2		5	18.3	25,3	8,5		5	22	26,7	13,0		5	19.3	25,7	14,6		5	17.3	24,9	10,6
6	16	27.4	8.3	0.4	6	18.3	28,5	15,8		6	24	30,0	11,8		6	16	21,7	16,5		6	17	23,8	12,8
7	19.3	27.1	13		7	21	23,5	11,1		7	19	30,8	15,1	16.5	7	13.7	23,3	18,0	35.5	7	13.7	22,6	14,4	1.3
8	5.7	14.9	6.3	8.5	8	19.7	21,5	9,9	0.5	8	24.7	28,9	14,0		8	15.7	22,7	17,3	14.5	8	14	22,8	13,5
9	10	17.7	4.9		9	19	23,1	7,8		9	24	28,0	16,6		9	15	22,4	16,8	83	9	15.3	20,8	10,3
10	9.7	14	5.7		10	18.7	25,2	9,7		10	24.3	27,5	17,9		10	18	23,1	15,1	3	10	15.7	20,5	6,4
11	8.3	12.4	7.2	10.5	11	20	27,3	10,0		11	21.7	30,3	17,5		11	17.7	24,2	14,7	14	11	14.3	18,7	6,5	1
12	11.7	13.6	2.5		12	27.3	28,0	9,5		12	25.3	32,6	18,7		12	19	20,1	12,4		12	13.3	16,9	6,5
13	13	17.6	5		13	22.3	29,6	14,5	0.2	13	22.3	28,6	18,7		13	22.3	21,4	9,6		13	13	18,1	10,5
14	14.3	23.5	7.5		14	20.3	25,2	15,3		14	19.7	20,5	15,4	2	14	23.3	27,4	10,3		14	10.3	19,4	9,4
15	19.7	27.1	9.6		15	18	20,2	6,1		15	15	17,8	11,4		15	23.7	29,4	17,5		15	10	14,4	7,6
16	19	24	11.1		16	21.7	25,7	6,0		16	13.3	14,6	10,3	4.5	16	25	29,0	17,9		16	6	14,2	0,7
17	21.7	29.3	14	4.3	17	27.3	30,4	14,5		17	14.3	19,0	12,0	0.2	17	26.3	28,9	16,3		17	12.3	14,6	0,9
18	10.7	15.8	6.8		18	26	29,1	12,6		18	22.3	24,9	10,7		18	24.7	28,0	14,4	0.2	18	11.3	15,7	6,0
19	6.7	7.7	0.4		19	28	31,5	15,0		19	17.3	26,3	15,0		19	21.7	27,7	12,8		19	7	10,0	2,0
20	15	16.7	3.5		20	28	33,2	16,2		20	20.3	27,8	15,8		20	21.7	24,1	15,8		20	5	13,8	-2,7
21	12	20.7	7		21	29	34,5	17,0		21	17.3	25,7	17,0	3	21	18.3	23,2	13,5		21	6.7	15,0	-0,8
22	8.7	12.9	5	0.2	22	27	34,9	19,3		22	18.3	24,1	16,2		22	17.7	21,8	12,0		22	9	20,4	3,5
23	11.7	18.5	5		23	28.3	31,8	19,8		23	24	29,2	14,8		23	18	22,9	13,1		23	13.7	23,6	6,8
24	16.7	22.3	3.7		24	21.7	28,6	19,2	2	24	25	30,8	17,9		24	17.3	24,6	10,4		24	11.3	22,5	7,9	0.2
25	19	25.4	5.9		25	25	28,5	15,0		25	20.3	30,5	16,4		25	16.7	28,2	11,0	2.7	25	12.3	20,8	11,6	2
26	23	29.1	15.6		26	21.7	28,0	12,8	1.2	26	20.3	30,4	17,1	12	26	13.7	24,8	13,9	2	26	13	18,1	7,2	4
27	25	30.8	15.3		27	24.7	29,1	13,0		27	19.3	25,7	17,5	43	27	10	18,8	10,7	19.5	27	10.3	12,0	8,7	2.8
28	15	24.6	13.2	5.5	28	25.3	31,0	14,4		28	18	19,5	17,0	66	28	10.3	13,4	10,0		28	6	11,6	4,3	4
29	20	23.8	8.6		29	21.7	23,4	16,2	14.5	29	22	25,5	17,7	5	29	13	15,1	9,0	3	29	4	11,9	5,8	6
30	21	27.8	11.6		30	19.3	22,1	10,1		30	19	27,8	18,9		30	17.7	19,8	9,4		30	7	9,2	2,6	4.5
31	21.7	23.5	14							31	20	29,5	19,8	1.4	31	20.3	23,4	11,4
2014
	May				June					July					August					September
Days	Temperature, °C			Rainfall, mm	Days	Temperature, °C			Rainfall, mm	Days	Temperature, °C			Rainfall, mm	Days	Temperature, °C			Rainfall, mm	Days	Temperature, °C			Rainfall, mm
	average	min	max			average	max	min			average	max	min			average	max	min			average	max	min
1	12.3	7	17		1	21.3	28	11		1	18	20	12		1	17.3	20	13		1	12	15	6
2	15.7	8	19		2	23.7	30	13		2	19.3	25	9		2	24	23	15		2	13.7	17	8
3	16.7	10	18		3	18.7	20	13		3	23.3	29	14		3	21.7	25	15		3	15	18	10
4	19.3	13	20		4	20.3	25	11		4	22.3	30	9		4	23	27	16	15	4	18	20	14
5	7.7	6	13		5	21	25	11		5	27	35	14		5	22.7	28	15		5	16.7	18	13	2.5
6	12.7	8	17		6	19.3	24	10		6	30	36	19		6	23.3	28	15		6	15.7	19	11	2.5
7	22.3	17	20		7	20.3	25	11		7	29	35	18		7	27.3	30	17		7	16	17	14
8	13.7	10	17		8	17.3	23	9		8	19.7	20	19	2.2	8	25	32	16		8	12.7	15	10
9	12.7	4	19		9	18	20	11		9	14.3	13	15	10.3	9	25.7	32	17		9	10.3	10	8
10	18.3	10	20		10	21.7	25	13		10	13.7	13	13	15.5	10	25	31	17		10	11	15	6	0.5
11	18.3	10	25		11	24	28	17		11	14	13	14	2	11	26	32	15		11	10	15	0
12	25	15	32		12	24.3	28	17		12	10	10	10	12.5	12	21.7	25	15	0.5	12	11.3	15	6
13	27	15	32		13	26.3	27	18	6.5	13	9.7	10	9	26.5	13	18.7	20	13		13	16	20	10
14	28	15	34		14	25.7	26	18	6.5	14	11.7	13	10	6	14	16	15	13	0.2	14	13.3	13	10	1.3
15	28	15	35	4.5	15	24	25	15	3	15	17	20	13		15	26.7	27	9		15	10	13	6
16	27	17	30		16	20	22	13	1	16	19	23	14	4.3	16	21.3	25	12		16	10	10	10
17	18	14	20		17	23.7	27	17		17	18.3	22	15		17	25.3	33	18	1	17	5	5	5	2
18	7.3	8	16	21	18	24.3	28	17		18	15	20	10	0.3	18	27.3	34	18		18	2	3	-3
19	10.3	5	13	2	19	23.7	25	18		19	12	13	10	1	19	29.3	35	20		19	4.7	6	3
20	12.3	9	13	0.5	20	21.3	24	14		20	11.3	13	10	47.5	20	28	32	20		20	11.3	15	6
21	11.3	5	16		21	20.3	25	11		21	11.3	11	10	16.3	21	22.7	27	16		21	14.3	20	8
22	27.7	15	35		22	27	32	14		22	12.7	15	10	5.8	22	22.3	25	15		22	12.7	20	3
23	25.7	15	30	11	23	28	32	18		23	12.7	15	10		23	22.3	27	15		23	15	20	10
24	20.3	13	25	1	24	25	32	15		24	13	15	9	1.4	24	22.7	28	15		24	15.3	18	10
25	25	15	30	11.5	25	24.3	25	15	10.5	25	12.3	13	10	0.2	25	20.3	23	15	8	25	13.7	15	8
26	24.7	18	23		26	27.7	33	15		26	11.7	14	8	0.3	26	16	25	8		26	10.7	13	6
27	15.3	13	15		27	26	31	17		27	12.7	15	8	1.3	27	18.3	24	10	1	27	7.8	8	5	0.8
28	13.7	10	13		28	26.7	30	17	1.5	28	12.7	14	9		28	20.7	20	15		28	9	13	4
29	12.7	5	15		29	27.32	33	17		29	13.2	14	10		29	18.3	20	15		29	11	15	5
30	15.3	5	20		30	20	20	15		30	12.7	15	11		30	22	18	18	0.7	30	10.7	13	7	0.3
31	19	7	25							31	15	14	9		31	15.3	18	10
2015
May					June					July					August					September
Days	Temperature, °C			Rainfall, mm	Days	Temperature, °C			Rainfall, mm	Days	Temperature, °C			Rainfall, mm	Days	Temperature, °C			Rainfall, mm	Days	Temperature, °C			Rainfall, mm
	average	max	min			average	max	min			average	max	min			average	max	min			average	max	min
1	13.7	20	6		1	29	32	20		1	27.7	33	20		1	21	26	13		1	8.7	9	3
2	12	15	6		2	28.7	35	18	2	2	22.7	25	20	1.5	2	23	27	14		2	8.3	9	3
3	13.7	20	6		3	26.3	25	20	1	3	20.7	24	15	0.5	3	20.7	23	14		3	9.3	11	4	1.5
4	12.3	15	12	1.5	4	26	28	17		4	16.7	23	10	6	4	19.7	24	11		4	14	20	7
5	12.3	13	9	1.2	5	26.3	30	16	0.3	5	17.7	25	10		5	16.3	20	9		5	14	20	7
6	12.7	12	11		6	26	31	17		6	21.7	25	15	1.2	6	14.3	15	9	6	6	16	20	10
7	6	5	8	8.5	7	18.3	20	15	6.5	7	16.7	15	13		7	15	20	10		7	20.7	27	15	1.5
8	5.7	5	5	4	8	14.7	17	10	0.3	8	13	17	7		8	17.7	25	9		8	24.3	33	15
9	6.3	5	9	34	9	12.7	15	11	4.5	9	16.3	20	12	2.4	9	18	25	9		9	24.3	30	16
10	5.3	5	4		10	14.7	18	9		10	17.7	23	10		10	18	18	13	7	10	17	20	15	0.5
11	5	5	5		11	14.3	18	9		11	27.3	35	19	0.2	11	15	17	13	0.5	11	14	14	12	5.5
12	6	8	5		12	15.7	20	9		12	23	28	17		12	15.3	18	9		12	13.3	15	10
13	15.3	20	8		13	15.7	18	12	8	13	21.7	25	17		13	16.7	20	9		13	10.3	12	5
14	15.7	20	10		14	16	20	10		14	23.3	28	17		14	18.7	23	10		14	12	15	4
15	17.3	22	12		15	18.7	23	13		15	25.3	30	18		15	20	25	13		15	14	20	4
16	15	15	12	2.5	16	25.3	30	17		16	25.3	32	17	0.2	16	20	20	15	1.7	16	14	18	7
17	15	17	9	2.1	17	31.7	38	19		17	26.3	30	17		17	18.7	25	14	0.7	17	11	15	4
18	12.3	15	7	0.7	18	33.3	44	18		18	18.3	15	15	3.5	18	20.3	23	15		18	11.7	15	5
19	11.3	13	7	0.8	19	31.7	40	20		19	20	22	15		19	18.3	20	12		19	12	12	10	0.3
20	12	14	9	16.2	20	31	40	19		20	14.7	15	13	3.4	20	16	18	10		20	16.3	18	14	0.2
21	12	15	7		21	32	40	20		21	18.7	21	14		21	14.7	19	10		21	11.7	13	10
22	12.3	15	8	0.8	22	31.3	39	20		22	20.3	24	15		22	16	20	13		22	10	10	7
23	17.3	25	10		23	31.7	40	20		23	20.7	25	14		23	13.7	15	14	3	23	7.7	10	5
24	18.3	20	15	0.5	24	31.3	38	20		24	19.7	24	13		24	10.7	14	4		24	10.7	12	10
25	19	25	10		25	28.3	32	20		25	18	20	14		25	10	13	4		25	11.3	12	10
26	21	26	15		26	23	23	18	60.5	26	17.7	18	15	2	26	10.3	13	7	0.7	26	11.3	10	10	2
27	22.3	30	13		27	22.3	28	17	0.7	27	19	23	14		27	13	18	8		27	14	15	10
28	24.3	33	16		28	25	32	18		28	19.3	24	13		28	13.7	18	9		28	15.3	20	8
29	26.7	33	17		29	27.3	35	20		29	19.3	25	13		29	15	12	15	4.7	29	16	17	10
30	27.7	32	18		30	31	38	22		30	18	23	12		30	14.7	15	13	2.7	30	11	13	7
31	30	35	20							31	20.7	25	14		31	13	15	10	0.5
2016
May					June					July					August					September
Days	Temperature, °C			Rainfall, mm	Days	Temperature, °C			Rainfall, mm	Days	Temperature, °C			Rainfall, mm	Days	Temperature, °C			Rainfall, mm	Days	Temperature, °C			Rainfall, mm
	average	max	min			average	max	min			average	max	min			average	max	min			average	max	min
1	11.6	18.2	2.5	0	1	11.1	16.5	1.8	0	1	16.7	21.6	14.5	2	1	18.9	24.1	14.9	4	1	18.3	25.4	10	0
2	8.4	13	4.2	0	2	13.3	20.3	3.4	0	2	17.9	21.1	15.5	7.4	2	21.5	28.3	13.8	0	2	19.8	27.3	13.4	0
3	7.6	13.5	0.2	0	3	17	22.8	9.1	0	3	18.6	23.5	14.4	2.3	3	24.9	32.8	16.7	0	3	15.6	21.1	11	0.8
4	10	16.8	2.6	0	4	17.1	23.5	13.7	1	4	19.5	24.5	13.5	0.4	4	25.1	31.4	18	0	4	10.8	15.5	8.1	2.8
5	12	18.6	4.1	0	5	16.4	23	11	0.3	5	18.6	23.8	15.5	7	5	25	31.1	17.4	0	5	15.5	24.1	8.5	0
6	13.3	21.7	1.4	0	6	20	26.3	10.8	0	6	22.6	29.3	14.2	0	6	26.3	33.1	17.2	0	6	19.2	25.8	11.7	0
7	12.6	17.5	4.6	0	7	22.4	28.7	12.8	0	7	21.5	25.9	18.4	3	7	23.3	28.3	16.8	0	7	17.6	23.1	12.8	0.6
8	7.6	12.7	3.9	0	8	23.5	30.7	17.7	0	8	21.8	27.2	15.6	0	8	24.5	31.5	15.5	0	8	13.4	19.8	8.1	0
9	8.7	13.8	3.8	0	9	19.9	22.4	16	0	9	22.2	28.6	13.8	0	9	26.6	34.4	18.7	0	9	12.1	16.7	5.8	6
10	11.8	21.9	3	0.4	10	17.4	24.4	9.1	0	10	23.4	29.5	17.3	0	10	27.3	35	18.5	0	10	11.8	16.5	8.2	0.4
11	12.3	16.3	8	0.9	11	14.6	19.1	10.2	9	11	22.5	27.9	15.2	0	11	26.8	34.5	18	0	11	10	17.4	3.2	0.3
12	15.4	23.6	4.5	0	12	13.4	14.6	12.7	30	12	19.7	22.4	18.1	10	12	25.2	31.4	19.2	0	12	9.7	13.2	7.5	1
13	19.3	27.6	11.8	0	13	15.9	19.3	13.5	7	13	19	23.8	16.7	22	13	24.7	31.5	17.9	0	13	11.6	16.9	7.3	0
14	8.4	15.4	4.1	0.3	14	20.3	25.4	15.2	0	14	20.7	25.5	15.8	0	14	23.7	30.6	15.7	0	14	11.3	12.5	9.2	6.4
15	4.3	6.1	3.3	0.5	15	19.9	25.9	11.3	0	15	21.4	25.2	16.7	0	15	24.3	31.5	15.3	0	15	13.1	19.1	7.5	0.7
16	8	15.1	-3.2	0	16	21.5	26.4	14.7	0	16	20.4	23	17.3	0	16	26	33.6	16.8	0	16	13.3	15.7	11.1	19
17	10	16.5	1.2	0	17	18.7	25.2	12.8	0	17	20.8	25.6	17.2	7	17	24	30.6	17.5	0	17	12.1	16.8	8.3	19
18	12.3	20.4	0.7	0	18	16.8	21.8	11.9	0	18	20.7	26.1	17.4	8	18	24.6	31.5	18.2	0	18	12.3	16	9.4	0.4
19	15.4	22.8	5	0	19	21	27.7	14.1	0	19	19.8	23.7	17.2	1.4	19	23.8	31.8	17.5	0	19	12.2	17.5	8.2	1
20	19.1	25.4	10.3	0	20	20.9	25.9	15.1	0	20	20.5	24.9	15.7	0	20	20.3	27.4	12.1	0	20	9.4	15.8	4.6	0
21	20.1	26.7	12.9	0	21	20.9	27.6	12.4	0	21	20.8	26.1	14.9	0	21	19.6	26.3	11.9	0	21	11.5	19.1	5.3	0
22	22	27.8	15.2	0	22	22.9	27.6	16.6	0	22	21.2	27.4	14.8	0	22	20.7	29	10.6	0	22	16.3	21.4	11.5	0
23	21.5	27.9	15.1	0	23	22.8	28.7	14.8	0	23	21.3	27.5	14.3	0	23	23.9	31.8	15.6	0	23	15	21.7	8.5	0
24	22.6	29.3	12.8	0	24	22.1	26.5	18.9	0	24	21.1	27	16.1	0	24	24.7	33.5	16.5	0	24	12.7	19.3	6.6	0
25	21.8	30.4	9.9	0	25	18.4	22.1	13.6	1	25	19.6	24.1	14.1	0	25	25.1	33.4	16.3	0	25	12	18.9	5.1	0
26	20.7	28.5	11.5	0	26	15.5	19.7	9.4	0	26	18.3	22.3	14.8	0	26	24.2	34	16.5	0	26	10.6	20	4	0
27	20.8	27.3	12.9	0.4	27	18.1	24.2	10.1	0	27	17.4	22.3	10.2	0	27	21.3	28.2	15.8	5	27	12.8	20.1	3.8	0
28	22.1	31.3	11.9	0	28	18.1	24.2	13.6	2.7	28	19.6	26.9	12.1	0	28	18.1	23.7	12.1	2	28	11.2	19.4	3	0
29	16.7	21.1	11.8	0	29	14.7	18.3	10.9	0	29	20.5	25.2	16.4	1	29	17.9	24.7	12	0	29	8.2	10.8	6.2	16
30	18.4	26	11.7	0	30	16.8	21	14.4	0	30	21.4	28.9	15.1	0	30	11.9	17.3	6.1	0	30	8.4	11.6	5.9	0
31	10.9	15.9	4.5	0						31	19.6	24.2	15.4	0	31	16.4	24.5	7	0
среднее	14.3774			2.5		18.38			51		20.2935			71.5		22.9226			11		12.9267			74.4
2017
May					June					July					August					September
Days	Temperature, °C			Rainfall, mm	Days	Temperature, °C			Rainfall, mm	Days	Temperature, °C			Rainfall, mm	Days	Temperature, °C			Rainfall, mm	Days	Temperature, °C			Rainfall, mm
	average	max	min			average	max	min			average	max	min			average	max	min			average	max	min
1	10.9	20	1.2	0	1	14.8	21	8	0	1	18.3	23.1	13	0.9	1	23.9	32.5	18	0	1	26.4	35.1	20.5	0
2	15.8	25.3	6.5	0	2	22.3	30.4	13.9	0	2	20.4	26.3	16.1	4	2	23.3	29.8	19.4	8	2	20.7	27.4	12	0
3	18.7	27	10.4	0	3	24.5	31.1	19.5	0.6	3	20	25.8	18.1	27	3	17.3	19.5	14.6	18	3	21.1	32	11.4	0
4	18	26.2	10.4	0	4	15.7	23	13	1	4	21.9	26.5	16.7	0	4	18.5	26.4	11.2	0	4	25.9	35.2	17.9	0
5	11.6	18.1	6.7	0	5	12.3	16.5	8.2	0	5	18.4	24.2	14.8	0	5	22.5	28.4	15.4	0	5	17.9	26.2	12.6	1
6	6.9	11.6	1.5	1	6	13.1	19.1	6	0	6	20.5	25.8	14.3	4	6	24	28.4	19.6	0	6	12.1	18.5	9.8	0
7	12.5	20.3	7.5	0	7	15.7	20.6	12.5	2.6	7	18.5	24.2	13.4	0	7	20.8	25.8	15.4	0	7	13.1	17.8	9.5	0
8	7.8	14.7	0.3	0	8	14.7	18.8	11.7	20.4	8	18.3	22.4	12	0	8	21.3	29.3	14.1	0	8	12.2	22	3.9	0
9	13.7	25.1	6.9	0.8	9	13.1	17.5	9	7	9	19.7	24.5	16	0	9	19.4	25.2	16	5	9	13.8	19.9	11.5	0.7
10	17.3	21.6	13.8	4.9	10	13.9	19.6	8.5	6	10	18.5	24	13.7	0.3	10	16.1	20.1	12.3	0.5	10	13.3	18.2	10.2	3
11	18	26.1	10.5	0.3	11	14.8	20.4	9.2	0	11	16.6	23	11.7	5	11	13.1	18.9	5.4	0	11	8.9	12.1	6.6	0.8
12	13.9	23	11	3	12	17.6	23.7	11.5	0	12	17.3	22.5	12.3	0.6	12	15.5	23.7	7.8	1	12	5.8	9	1.5	0
13	11.9	20.4	3.2	0	13	19.4	25.1	15.1	0.4	13	16.8	22.8	10.1	0	13	16.5	20.5	12.5	5	13	7.8	11.1	5.3	0.8
14	10.3	15.8	1.4	0	14	20.4	27	12.5	0	14	16	23.5	9.4	1	14	17.7	23.8	13.7	0.3	14	14	24	6.2	0
15	9	15.2	2.7	3	15	23.8	30.6	16.7	0	15	16.4	20.6	13	13	15	19	26.7	11.7	0	15	18	29.2	10.3	0
16	6.9	12.6	0.6	0	16	24.8	32.1	18.7	0.5	16	17.9	24	10.6	0	16	20.4	26.9	14	0	16	18	29.5	9	0
17	8.8	16.5	-0.4	0	17	22.6	30.5	17.4	5	17	19.1	25.6	14.8	7.9	17	20.1	25.5	14.9	0	17	18.1	25	12.6	0
18	13.1	19.9	4.6	0	18	16.9	19	15.7	32	18	18.1	24	12	2	18	16.4	22	10.4	0	18	14.2	20.6	8.5	0
19	16.1	22.5	7.4	0	19	17.9	23.4	12.3	1	19	19.8	26.2	13.2	0	19	15.1	25	6	0	19	13.5	22.4	4.7	0
20	18.4	25	13	0	20	19.1	24.7	13.4	0	20	22.3	28.5	15.3	0	20	19.6	24.8	15.1	0	20	21.7	30.6	14.6	0
21	18.8	27.6	9.9	0.3	21	18.5	22.1	16	0.4	21	23.6	28.2	18	2	21	21	29	14.9	0	21	15.8	24.4	8.7	0
22	22.7	28.7	17	0.7	22	19.6	26.1	10.8	0	22	22.5	28.7	18.6	0	22	21.9	29.7	12	0	22	9.4	15.6	7	0
23	11.5	24	7.4	1.7	23	22.1	28.1	16.5	0.4	23	23.5	27.1	19.6	0	23	21.6	30.8	11	0	23	5	10.2	-1.4	0
24	9	14.8	4.3	2	24	20.2	24.2	14.8	0	24	20.2	26.6	13	0	24	23.5	32.3	14.6	0	24	5	10.6	-0.8	0
25	14.6	22.9	5.3	0	25	20	26.8	13.9	2	25	20.9	24.5	18.7	1	25	24.6	33	16.5	0	25	4.6	8.4	2.1	0
26	17.3	26	7.4	0	26	17.8	22.8	12.8	0	26	20	25.7	13.2	0	26	24.5	32.2	17.4	0	26	4.7	11.7	-1.3	0
27	18.9	27.2	14.3	0	27	19.4	27.6	9	0	27	18.6	25.3	14.1	1	27	24.1	30.3	19.8	0	27	4.5	9.4	-1.2	0
28	17.7	24.3	12.1	1	28	22.5	29.7	12.3	0	28	20.1	27.1	12.5	0	28	22.2	29	15.2	0	28	3.7	7.2	-1.2	0.3
29	8.5	19.9	5.5	14.5	29	22.9	27.1	19.3	0	29	23.7	31.3	15	0	29	18.7	26.2	9	0	29	2.9	9	-4	0
30	7	12.5	2	0	30	20.8	24.8	16.2	0	30	22.7	28.7	16	0	30	22.3	32	14.3	0	30	6.6	9.4	4.7	0.9
31	11.9	13.8	8	17.7						31	21	28	12.3	0	31	23.8	31.2	15.4	0
среднее	13.4677			50.9		18.7067			79.3		19.729			69.7		20.2806			37.8		12.6233			7.5
2018
May					June					July					August					September
Days	Temperature, °C			Rainfall, mm	Days	Temperature, °C			Rainfall, mm	Days	Temperature, °C			Rainfall, mm	Days	Temperature, °C			Rainfall, mm	Days	Temperature, °C			Rainfall, mm
	average	max	min			average	max	min			average	max	min			average	max	min			average	max	min
1	5.9	10.2	1.1	4	1	8.7	17.4	6.6	19	1	21.9	27.5	17.9	0	1	18.2	27.3	10.1	0	1	9.1	14.6	3.4	0
2	8.7	15.9	3.3	0	2	6.6	10.2	4.9	16	2	22.9	30.3	14	0	2	20	24.3	15.5	6	2	10.9	20.3	3.1	0
3	10.2	15	6.5	2	3	8.4	15	4	5	3	22.5	29.5	17.8	0	3	22.1	28.6	14	0	3	12.8	19.6	5.6	0
4	13.1	21.8	9.3	1.7	4	12.1	20.2	3.9	2	4	21.7	28.4	14.7	0	4	20.6	26.8	16.1	0	4	12.8	19.8	3.3	0
5	5.1	9.4	0.4	0	5	20	27.4	12.2	0	5	20.8	25.3	18.6	6	5	19.9	27.2	13	0	5	12.7	19	6.1	0
6	6.5	15.8	-3	0	6	23.3	30.6	17.2	0	6	21.6	27.4	17.7	0	6	24	31.8	16.1	0	6	13	17.2	9.5	0
7	11.9	16	9.4	0.7	7	22.1	29.3	14.5	4	7	22.9	29	15.3	0	7	24.9	32.8	16.2	0	7	12.6	15.9	7.7	0
8	7.8	15.3	2.2	0	8	14.1	19.1	8.6	0	8	24.1	32	16.9	3	8	23.5	30.1	16.8	2	8	12.9	21.2	4.5	0
9	11.8	22.3	2	0	9	14.9	22.1	6.7	0	9	25.3	29.8	20.5	0	9	23	29.6	20	1	9	14.8	21.7	8.1	0
10	12.3	18.8	7.7	1.4	10	14.7	20.4	11.4	0	10	25.5	32.7	18.5	0	10	16	22.4	13.5	0.7	10	11.2	15.9	6	0
11	8.1	12.4	4	0.4	11	13.8	19.6	7.8	2	11	23.6	29.8	18.5	0	11	18.3	25.7	11.3	0	11	8.6	16.7	1.2	0
12	11	21.4	1	0	12	13.1	17.6	6	0.5	12	21.6	27.9	15	0	12	18.6	25.9	11.9	0.9	12	11.4	20.4	2.3	0
13	7.1	15.4	-2	0	13	13.9	20.5	8	0	13	20.2	26.3	16.5	2	13	23.2	31.2	15.4	0	13	15	24.5	7.7	0
14	12.4	23.5	2.1	0	14	17.3	24.3	13.7	0	14	21	26.8	17.1	6.3	14	23	28.7	18.7	2	14	18.2	23	14	0.9
15	12.7	21	1.2	0	15	16.9	22.6	13	0	15	23	27.7	17.8	0	15	18.4	21	16	3.5	15	15.8	21.6	7	0
16	9.3	20	5.5	0	16	14.9	19.8	7.7	0	16	21.7	27.1	14.9	0	16	18.7	24.5	14.4	7	16	13	20.6	4.9	0
17	8	15.6	-1.7	0	17	12.3	17	4.5	0	17	22.3	29.8	14.3	0	17	19.8	27.9	13.9	0	17	14.1	21.1	5.9	0
18	12.8	23.5	1.5	0	18	13.2	21.2	4.9	0	18	24.2	30.9	17.9	0	18	15.2	22.4	12.6	2.8	18	17.2	23.7	12.5	0
19	12	20	4	0	19	17.2	23.7	12.1	0	19	24	29	20.6	0	19	13.1	15.7	11.7	0.6	19	16.9	21.3	14.2	0
20	21.6	29.8	15.9	0	20	20.4	27.8	11.6	0	20	24.7	32.6	16.7	0	20	12.2	16.5	11.1	6	20	13.5	17.2	7.8	0
21	22.1	29.2	14.7	0.3	21	20.5	26.2	17.4	0.3	21	21.2	27.1	17.3	0	21	15.2	22.3	10.6	0.6	21	11	14	8.7	10
22	15.3	22.1	10.1	8	22	17.1	22.6	12.6	0	22	16.4	20.6	11.1	0	22	18.5	26.4	13	9	22	13.3	17.3	11.1	0.4
23	15.7	21.6	7.9	0	23	20.5	26.8	13.7	0	23	16.4	24.8	6.1	0	23	20.2	28.6	13	0	23	12.6	17	8.5	0
24	20.6	29	13.1	0	24	19.5	24.8	14.4	0	24	22.9	30.2	15.4	0.3	24	12.7	20.5	8.3	0	24	11.8	21.3	3.5	0
25	19.8	26.8	16.2	1	25	21.5	29.4	12.4	0	25	22.7	29.5	14.2	0	25	12.2	15.7	10.3	2.4	25	13.1	22.6	7.4	0
26	8.7	16.2	6.7	23	26	21.1	27.8	14.5	0	26	22.1	29	13.2	0	26	16.2	20.6	12.6	7.6	26	15	23.3	7.6	0
27	8.9	15.7	2.6	0	27	17.1	23.7	12.4	2.3	27	24	32	16.6	0	27	14	18.4	11.7	29	27	16.5	25.5	8	0
28	13	19	8.6	0	28	20.9	28	15.8	5	28	24.6	32.2	16.1	0	28	14.1	17.9	10	0	28	10.5	16.1	8.4	0.7
29	7.9	12.2	4.7	0	29	19.9	26.7	17	22	29	24.7	32	17.4	0	29	16.3	22.4	10.3	0	29	11.7	18.5	5.8	0
30	10.9	18	0.3	0	30	20.5	23.5	17.2	0	30	18.3	27.6	14.1	18	30	16.9	24.3	10	0	30	13.4	18.7	8.2	0
31	16.1	21.5	12.7	2						31	16.3	21.8	12.2	1	31	13.5	20.2	9	0.7
среднее	11.8484			44.5		16.55			78.1		22.1			36.6		18.1452			81.8		13.18			12
2019
May					June					July					August					September
Days	Temperature, °C			Rainfall, mm	Days	Temperature, °C			Rainfall, mm	Days	Temperature, °C			Rainfall, mm	Days	Temperature, °C			Rainfall, mm	Days	Temperature, °C			Rainfall, mm
	average	max	min			average	max	min			average	max	min			average	max	min			average	max	min
1	2.8	9.6	-4.2	0	1	21.2	26.8	15.8	1	1	23.7	32	16	0	1	23	29	19.3	4	1	10.8	14.1	7.1	0
2	6.3	14.7	-4.5	0	2	21.6	29.8	15.7	0	2	21.2	30.5	19.3	11	2	14.6	20.4	9.2	0	2	10.2	13.7	7.4	0.9
3	10.3	18.3	1.5	0	3	19.3	26	9.2	0	3	17.2	21.4	11.6	0	3	17.9	22.4	12	0	3	11	15.3	5.9	1.4
4	14.9	22.9	4.7	0	4	21.3	27.4	16.9	0	4	20.2	26.5	14.9	0	4	19.5	24.2	15	0	4	13	17.6	9.9	4
5	17.4	26.2	10.4	2	5	9.4	16.9	7.3	3	5	23.9	30.5	15.5	0	5	20.1	28.4	10.8	0	5	12.4	17.9	7	3
6	19.3	27	10.1	0	6	15.4	23.1	9.7	1	6	20.6	28.9	16.6	2	6	23.3	28.7	18	0	6	12.9	18.3	8.6	0
7	20.9	29	9.7	0	7	13.9	18.7	11.8	2.6	7	20.4	28.7	11	0	7	17.3	22.8	10.2	0	7	11.7	17.1	7.8	1.3
8	22.3	29.9	11.9	0	8	17.1	22	12.2	0	8	21.1	25.3	14.6	0	8	17.5	23.3	11.9	0	8	12.5	17	9.6	2
9	22.8	30.8	13.4	0	9	18.7	23.6	13.8	0	9	20.8	24.8	16	0	9	17.1	24.8	7.9	0	9	12.9	18.7	8.3	0
10	23.7	31.4	14.4	0	10	19.8	30.4	8.7	0	10	23.2	33	13	0	10	24.2	33	15.7	0.3	10	12.1	18.3	6.1	0
11	22.7	30.2	11.7	0	11	24	30.7	17.8	0	11	26.9	31.2	21.5	0	11	26.4	35.5	17.7	0	11	12.8	20.4	5.2	0
12	22	29.7	13.6	0	12	24.2	30	15.7	0	12	28.3	37.4	17.8	0	12	26.1	32.2	19.6	0.3	12	16.7	22.3	13	0
13	21.6	28.9	15.7	3	13	16.7	26.3	14.3	0.3	13	30.6	37	23.3	0	13	19.5	24.6	16.5	0.7	13	16.8	22.9	10.2	0
14	19.8	29.3	11.6	0	14	11.4	17.2	3.7	0	14	27.5	35.3	18	0	14	18.3	25.4	9.3	0.9	14	16.8	25.1	8.8	0
15	9.4	14.6	4.1	0	15	13	17.5	7.7	0	15	30.3	37.9	21.1	0	15	19.5	25.7	13.6	0	15	16.9	26	7.8	0
16	11.2	18.6	2.6	0	16	14.4	21.9	5.5	0	16	23.4	34.1	16.4	0	16	19.7	27.4	10.7	0	16	16.5	24.4	11.5	0
17	12.9	17.6	9.3	4	17	14.3	19.5	10.8	1	17	22.3	28.7	13.4	0	17	21.6	30.8	11.8	0	17	14.5	20	9.7	0
18	10.3	15.4	5.8	2	18	13.9	18.6	9	0	18	25.7	34	17.7	0	18	25.5	34.3	15.8	0	18	16.9	24	14.6	6
19	9.5	13.8	7.4	0.5	19	15.8	23.4	4.9	0	19	27.9	33.7	22.7	0	19	24.3	29.5	19.2	0	19	14.6	21.3	8.8	0.7
20	7.8	13.6	3.9	0	20	21.1	30.2	10	0	20	27.1	31.2	23	0	20	23	28.2	18.3	0	20	11.1	16.8	6.7	0
21	8	14.3	1.8	0	21	22.8	29.6	15	0	21	25.4	35.5	18.3	3	21	21.2	25.4	17.6	0.7	21	7.6	13.4	3	9
22	9.5	14.8	5.4	0	22	18.5	26.1	13.3	0	22	21.9	28.7	15.1	0	22	16.8	24.4	8.7	0	22	8.8	9.7	7.4	14
23	13.3	21.4	4.5	0	23	21	30.5	10.5	0	23	21.7	28.1	16.2	0	23	19.3	28	9.8	0	23	5	9	1.6	4
24	18.6	25.8	10.5	0.6	24	26.5	33	20.4	0	24	21.1	27.3	14.8	0	24	19.6	24.9	12.6	0.4	24	5.9	10.5	2.6	0
25	9.5	23.2	5.2	3	25	24.8	33.4	17.3	0	25	20.7	27.4	13.2	0	25	19.7	28.6	11.1	0	25	4.6	8.9	0.1	0
26	11.6	21.8	0.6	0	26	17.6	24.2	14.1	3	26	19.4	26.4	11.6	0	26	17.8	25.3	14.8	5	26	4.1	10.2	-1.1	0
27	17	24.7	8.3	0	27	15.3	21	10.9	0	27	21.1	28.9	11.5	0	27	13.4	18	9.7	0	27	6	10.7	1.8	0
28	20	28.8	8.9	0	28	17.7	23.6	12	0	28	23.2	29.3	16.7	0	28	16.7	24.2	9.4	0	28	4.7	9.2	-0.9	4
29	20.8	27	15	0	29	20.9	27.5	14.8	0.3	29	20.4	26.5	17.5	8	29	16.6	20.8	13.2	2	29	2.7	6.6	-1.5	0
30	18.9	27	7.6	0	30	23.3	29.4	16	0	30	19.7	25.8	13.2	0	30	10.2	13.4	9	28	30	4.8	11	-1.6	0
31	20.8	31.1	10.6	2						31	19.7	28.3	9.8	0	31	8.7	11.4	7.2	5
среднее	15.3516			17.1		18.4967			12.2		23.1161			24		19.3032			47.3		10.91			50.3
2020
May					June					July					August					September
Days	Temperature, °C			Rainfall, mm	Days	Temperature, °C			Rainfall, mm	Days	Temperature, °C			Rainfall, mm	Days	Temperature, °C			Rainfall, mm	Days	Temperature, °C			Rainfall, mm
	average	max	min			average	max	min			average	max	min			average	max	min			average	max	min
1	17.4	22.6	12.1	0	1	25.1	28.7	21.2	0	1	14.8	20.6	10.2	0.3	1	27.2	36	17.5	0	1	22.2	30.3	14	0
2	16.4	24.5	9.1	0	2	18.3	23.9	11.6	0	2	14.3	19.4	7.9	0	2	28.4	36.4	19.7	0	2	23.2	32.2	16.8	0
3	9.7	13	5.9	0.8	3	15.2	20.3	8.9	0	3	18.2	25	10.8	0	3	29.4	36.5	22.9	0	3	13.1	18.3	9.8	0
4	9	17.2	-0.7	0	4	14.7	20.6	7.9	0	4	21.1	28.3	14.4	0	4	28.5	34.4	21.3	0	4	10.5	14.5	3.5	0
5	13.3	21.9	4.8	0	5	14.1	22.4	3.6	0	5	21.1	28.5	12.4	0	5	26.4	33	18.5	0	5	11.1	15.7	7.3	0.6
6	16.9	23.9	9.9	0	6	17.8	25.2	7.9	0	6	21.9	27	18	4	6	26.1	33	16.5	0	6	10.6	18.1	1.6	0
7	16.9	24.5	7.1	0	7	20	27.6	9.2	0	7	24	29.8	16.7	0	7	26.3	34	17.6	0	7	15.4	22.6	8.6	0
8	19	27.4	7.8	0	8	22.4	29.4	12.1	0	8	25.6	31.4	18.6	0	8	23.4	29.3	18	0	8	12.5	19.1	4	0
9	21.4	28.1	14.7	0	9	23.4	31.2	12.4	0	9	26.4	32.6	18.3	0	9	20.5	28.3	17.3	8	9	14.1	22.3	7.2	0
10	21.1	27.2	14.5	0	10	25.3	31.7	16.6	0	10	28.1	35.6	19.6	0	10	19.7	25.5	15.5	1.7	10	14.3	22.4	6.9	0
11	21.2	29.9	13	0	11	25.4	33.2	16	0	11	29.4	37	21.2	0	11	15.9	20.4	12.6	2	11	16.3	24.6	8.4	0
12	19.9	25.1	17.1	0	12	26.2	32.7	20.1	0	12	27.4	32	21.3	0	12	14.7	17.2	12.8	0.4	12	16.1	24	8.9	0.3
13	19.8	24.8	13.3	0	13	19.6	23.5	16.4	0	13	25.6	34.4	15.4	0	13	15.6	20.2	9.2	0	13	15.6	20	11.1	0
14	14.4	16.2	12.7	16	14	13.7	19.2	5.2	0	14	27.8	34.5	18.8	0	14	14.8	21.7	7.5	0.3	14	12.7	20	4.7	0
15	15.8	21.2	12.2	2	15	15.2	23.5	3.8	0	15	28.9	35.4	21.9	0	15	19.7	27.7	12.7	2	15	11.7	13.8	9.2	5.4
16	16.6	21.4	11.3	0	16	18.4	25.4	9.6	0	16	27.9	34.8	19.4	0	16	15.6	18.7	13	43	16	8.6	9.2	7.7	27
17	15.8	21	11.6	0.4	17	21.4	29	11.7	0	17	27.9	34.4	19.5	0	17	15.4	20.8	11.4	4.5	17	10.6	13.1	8.7	2
18	10.9	13.4	9	18	18	18	20.1	15.4	0	18	29.7	37	21.9	0	18	14.5	18.2	11.4	1.7	18	11.1	15.2	8.5	0
19	9.8	14	8.1	26.4	19	14	19.7	4.7	0	19	29.4	35	22.5	0	19	13.3	16.6	10.8	3	19	12.5	19.4	7	0
20	11.6	17	8.9	7	20	18	27.9	6.4	0	20	24.8	31.1	21.7	0.4	20	11.8	15.7	8.6	1	20	13.2	17.8	10.8	0
21	9.8	14.7	5.7	4	21	18.7	24.8	11.9	0	21	23	27.6	19.2	5	21	15.1	21.3	11.7	0.6	21	8.3	13.1	4.8	0
22	14.2	20.4	8.3	0	22	14.2	18	9.1	7	22	20.5	26.5	14.4	0	22	15.2	20	11.4	1.3	22	6.2	11.1	3.7	1
23	20.8	28.2	14.6	7	23	14.3	20.2	6.1	0	23	22.3	27.1	16.4	2.3	23	15.2	20.1	11.5	0	23	8.1	13	3.5	6
24	25	32.9	17	0	24	18.2	25.8	9.2	0	24	18.2	23.6	16.2	2	24	15.1	21.1	11	0	24	8.5	13.6	4.8	0
25	27.1	34.3	18.7	0	25	14.2	21.9	9.1	3	25	20.5	25.7	14	0.4	25	16.7	25.3	9.3	0.5	25	7.5	13.2	2.5	0
26	17.8	23.7	11.3	0	26	10.1	14.4	5.4	10.3	26	19.5	24.4	16.5	4	26	20.1	25.3	15.6	0	26	7.6	16.4	1	0
27	17.2	22.7	10.7	0	27	12.9	17.9	6.9	0	27	18.5	24.2	12.2	0	27	18.9	27	11.3	0	27	9.2	18.4	1.9	0
28	21	27.3	13.8	0	28	15.5	24.1	8.1	2	28	18.6	25.5	10.6	0	28	21.8	30.7	14	0	28	9.7	18.4	2.2	0
29	20.6	23.5	16.5	0	29	15.8	21.8	9.4	0	29	19.3	26	11.4	0	29	23.7	32.4	17	0	29	9	18	2	0
30	19	26.1	9.4	0	30	13.6	20	12.3	2	30	22.2	29.3	12.9	0	30	23	31.8	13.5	0	30	7.7	15.4	2.8	0
31	23.8	31.6	15.8	0						31	25.2	33.7	15	0	31	23	32.6	13.6	0
среднее	17.2			81.6		17.79			24.3		23.2935			18.4		19.8387			70		11.9067			42.3

## Sheet: Karaganda 2013-2020
Meteo data from 2015-2020 years for Central Kazakhstan (Karaganda Institute of Agriculture)
2013
May					June					July					August					September
Days	Temperature, °C			Rainfall, mm	Days	Temperature, °C			Rainfall, mm	Days	Temperature, °C			Rainfall, mm	Days	Temperature, °C			Rainfall, mm	Days	Temperature, °C			Rainfall, mm
	average	max	min			average	max	min			average	max	min			average	max	min			average	max	min
1	8.2	15	-1.5		1	12.9	20	9	0.5	1	16.7	22.4	10.8		1	23.4	33	17.6		1	14	22	7
2	11.3	19.4	3.5		2	12.6	17.5	7	0.7	2	13.8	19.2	10.6	2.4	2	19.8	29.6	12.2		2	16.1	24	7.4
3	7.3	15	4	6.2	3	13	19.4	4.8		3	15.5	22	10.8	5.2	3	18.4	26	9.9	1.6	3	18.9	27.6	11
4	7.5	14.5	0.5	1.3	4	11.2	17.4	5.5		4	12.4	14.4	10.8	6.5	4	18.9	25.4	12.5	1.6	4	18.6	28.5	8
5	8.9	14	3		5	13.5	22	3.5		5	14.3	19	10	3.7	5	18	22.6	11.7	4.8	5	21	28	12
6	7.6	16.4	-1.5		6	17	26	4		6	17.1	23.8	10.3	5.3	6	19.7	26	12.5	0.3	6	18.3	23.1	13.8
7	14.1	22	5		7	19.5	29.3	7		7	18.3	25.2	11.1	0.3	7	20.4	27.4	16.5	0.8	7	15.5	22	9.4
8	15.6	26	4.5		8	22	30.5	11		8	19.4	27.4	12.6		8	18.3	26	14	2.9	8	16	24	9
9	13.8	21.9	8.8	0.6	9	19.2	25.5	14.8	2.2	9	19.7	26.3	14		9	18.9	27.5	9.6		9	18.3	24.2	13
10	8.1	13	5	0.8	10	18	23	11	2.1	10	21.5	28	14.1		10	19.3	26.2	13	0.3	10	10.9	16.5	9
11	6.7	12.5	-1.5		11	15.3	22.8	9	0.6	11	22.7	29.8	13.6		11	16	21	11.4	1.4	11	8.8	12.5	4	4.3
12	9.2	11.8	6	6.4	12	16.2	22	8	0.5	12	25.3	34	16.4		12	16	23	11		12	11.6	14.7	8
13	5.6	12	-2.9		13	18.8	26	9.1		13	24	31.5	19.5		13	13.4	17.2	12	2.6	13	11.3	15	9
14	10.1	18.6	-0.5		14	16.6	27.5	6.1	0.4	14	22.2	27.6	16		14	14.7	20.1	11		14	10.7	15.1	8	0.3
15	15.4	22.5	7.1		15	13.1	17.8	8.5	1.9	15	16.7	22.6	14.4	6.2	15	16.5	23.8	8		15	9.1	14.5	3
16	12.3	19	6.5		16	9.5	14	4.5		16	14.3	21	7.3	1	16	17.6	24	10.2		16	7.8	9.6	5.8
17	13.2	22.6	2		17	13.1	22.5	1.5		17	13.1	18	58.2		17	16.2	22	10		17	5	9	2
18	15.3	21	6.7		18	19.1	26	9.5		18	15.7	22	10.5		18	15.5	23	4.5		18	4.8	11.2	-4.6
19	7.7	15	0		19	18.8	26	9.5		19	14.9	22	8.5	4.8	19	17.8	25.8	6.2		19	5.1	12	-3.5
20	7	12.2	0.5		20	20	27.9	7.1		20	17	22.3	12.5	0.3	20	19.7	28.5	12		20	4.6	9.8	-0.5
21	8.4	14.8	1.9	4.2	21	21.2	28.5	10.1		21	16.9	24.4	8.3		21	21.3	28.2	13.8		21	4	11.5	-2.6
22	10.9	17	8.5	4	22	22.5	29.2	14.2		22	16.3	20.5	10		22	21.7	28	13		22	7.2	17	-0.6
23	8.7	15.4	3		23	22.9	30	13		23	17.6	23.4	12.4	0.6	23	21	28	15	0.4	23	10.4	21	-2
24	11.1	18.5	1		24	22.7	30	14.6		24	19.5	26.5	13.4	0.7	24	19.7	26	15	6.2	24	12.7	26	-1
25	11.7	19.5	2		25	21.4	32	13.3	0.5	25	21.1	28.9	12		25	16.1	21.5	10	5.4	25	14.9	25.5	3.5
26	13.2	20	4.1		26	20.2	27	15	1.4	26	21.6	29	13.5		26	17.6	27	9		26	15.6	23.1	7.2
27	18	26.5	6.1		27	16.7	21.7	12.6	0.4	27	22.8	31.5	11.8		27	19.7	26	13.5		27	10.9	17	5.5	0.5
28	20.7	29.6	10		28	19.7	26.2	12		28	20.9	27.6	16	0.6	28	22.1	31	11.5		28	7.6	12.5	4.5
29	15.6	21.8	9		29	18	25	9.3		29	21	25.6	15.2		29	14.8	24	9	19.7	29	7.8	16.6	-2
30	13.2	22	2		30	16.5	24	10		30	21.9	28.6	12.5		30	9	12	7	5.9	30	12.6	23.1	-1
31	15.8	24.7	30							31	23.2	29.5	15		31	12.5	17	8
2014
	May				June					July					August					September
Days	Temperature, °C			Rainfall, mm	Days	Temperature, °C			Rainfall, mm	Days	Temperature, °C			Rainfall, mm	Days	Temperature, °C			Rainfall, mm	Days	Temperature, °C			Rainfall, mm
	average	min	max			average	max	min			average	max	min			average	max	min			average	max	min
1	14.1	3.6	24	0	1	9.2	14.8	2.1	0	1	18.7	26.1	11.2	0.4	1	15.7	23.3	7	0	1	19.3	26	13.2	0
2	17	5.6	26.5	0	2	10.7	17.2	2.5	0	2	13.6	18	10.8	8.3	2	18.3	25.4	10.6	0	2	11.5	15.9	7.4	0
3	18.5	7.7	28.5	0	3	13.9	21.6	2.5	0	3	12.6	16	11	9	3	19.4	26.5	10.5	0	3	9.9	17.1	1.3	0
4	19.9	8.2	28.8	0	4	14.4	20.6	12	0.4	4	14.5	21.6	11	12	4	19.8	27.5	10.8	0	4	11.6	18.8	1.5	0
5	15.9	10	23.8	0	5	13.2	18.8	8	0	5	16.6	23.8	9.1	0.4	5	19.6	26.6	11.9	0	5	13	22	3.3	0
6	13.5	5.3	22.3	0	6	15.8	24.2	4.2	0	6	18.6	25.5	11.1	0	6	20	27.1	11.5	0	6	15.2	22.4	6.8	0
7	15.4	7	24.1	0	7	14.7	21	10.2	0.3	7	19.7	27.1	12	0	7	20.2	28.5	10.5	0	7	17	25.6	9	0
8	19.5	7.8	29.2	0	8	9.4	14.4	4.5	0	8	21.9	30.2	12.5	0	8	19	26.5	13.4	0	8	13.4	18.9	6.6	0
9	12.9	7.1	19.2	0	9	11.8	18.4	2.5	0	9	24.4	33.7	14.8	0	9	17.7	25.5	8.5	0	9	6.9	12.4	2.2	0
10	10.3	1.8	17.6	0	10	17.2	25.4	6.3	0.3	10	26.5	34.1	18.3	0	10	20	28.1	8.4	0	10	6.4	12	1.3	0
11	8.3	-1	15.9	0	11	21.1	30	11.5	0	11	26.9	37	18.9	0	11	23.7	34.6	13.1	0	11	5.4	11	0.5	0
12	15.1	2.5	23.6	0	12	22.8	31.8	16.5	0.3	12	20.6	26.1	17	0	12	25	34.5	18	0	12	7.8	16	-2.4	0
13	20.5	13.8	29.4	0	13	24.7	32.7	17.1	0	13	17.4	27.4	11.2	0	13	22.3	28.9	17.6	0	13	11.7	18.4	6.7	0
14	19.1	11.2	26.5	0	14	25.8	35.7	17.2	0	14	16.4	23.3	7.5	0	14	15.4	20.4	12.6	9	14	12.5	21.2	3.8	0
15	16.7	7.6	24	0	15	22.2	27.5	18	0.8	15	11.7	17.8	9.9	8.3	15	14.1	20.5	8.9	0	15	13.4	21.5	7.8	0
16	18.7	6.5	28	0	16	21.6	29	12.2	0	16	14.7	19.7	10.8	0	16	15.4	21.8	11.8	0	16	11.2	19.9	4	0
17	18.7	10.8	28.8	0	17	22.4	30.3	14.7	0	17	16.2	23.9	8.7	0	17	17.1	25.9	8.1	0	17	15.4	25.5	3.5	0
18	10.1	4.2	16.5	0	18	23	30.6	13.4	0	18	19.3	30.5	10	0	18	21.1	30.4	11.4	0	18	5.7	14.8	3.5	3
19	5	0.8	10	6	19	23	30.5	14.5	0	19	18.4	24.3	13.5	2	19	24.1	34	15	0	19	2.7	5.6	0	0.1
20	6.9	0.2	11.9	12	20	25.3	33.6	16	0	20	21.7	29.5	14.1	5	20	24.2	32	18	0	20	5.4	12.6	-1.8	0
21	7.2	4.8	12.1	3	21	24.8	34.3	18.4	3	21	21.7	28	15.4	0	21	21.9	30.2	14.9	0	21	7.6	15.2	-0.7	0
22	7.4	3.5	12.4	0.7	22	19.8	26.3	14.3	0	22	17.7	24.4	9.2	0	22	23.8	35.1	13.4	0	22	9.3	15.8	-0.8	0
23	10.9	7.8	16.5	0	23	19.9	26.3	12.9	0	23	17.9	23.5	10.9	0	23	26.1	36.4	15.1	0	23	11.5	19.9	3	0
24	17.5	7.5	26	2	24	24.4	31.5	16.6	0	24	15.4	20.6	10.8	5	24	26.9	36.5	20.2	0	24	11.5	19	4.4	0
25	16.4	9.2	23.1	0	25	25.1	33.4	16.7	0	25	16.9	22.6	13	1.3	25	23.4	34.5	18	0.3	25	11.6	17.4	4.8	0
26	20.3	12.2	28	0	26	25	31.7	17.2	0	26	17.3	25.8	9.9	3	26	14.1	18.2	10.2	10	26	12.4	20.6	4.4	0
27	18.5	11.5	28.5	1	27	28.5	37	19.6	0	27	16.7	24	11.4	0.8	27	12.3	18.5	5.3	0	27	7.9	12	6.6	17
28	16.8	13.5	22.9	0.3	28	26.3	32	20.2	0	28	13	18.5	10	6	28	14.6	22	6.6	0	28	9.6	11	7	2.7
29	7.3	2	13.5	12	29	21.5	25.2	16	0	29	10.9	14.4	8.8	14	29	17.5	25.4	11.5	0	29	3	9.8	0.8	0.8
30	6.2	0	11.8	0	30	23.2	31.3	11.5	0	30	12	19	6	2	30	20.8	32.2	10.1	0	30	2.5	7	-2.5	2
31	9.4	3.9	14.8	0						31	11.9	16.4	6	0.5	31	22.5	32.7	13	0
2015
May					June					July					August					September
Days	Temperature, °C			Rainfall, mm	Days	Temperature, °C			Rainfall, mm	Days	Temperature, °C			Rainfall, mm	Days	Temperature, °C			Rainfall, mm	Days	Temperature, °C			Rainfall, mm
	average	max	min			average	max	min			average	max	min			average	max	min			average	max	min
1	12.8	21.1	0		1	15.3	23	6		1	24.7	34	13.1		1	23	32.5	11.5		1	19	30.5	10
2	14.4	22	8		2	18.9	26.5	7		2	23.5	33.6	13.5	1	2	23.3	30	15.8		2	14.6	19.8	11.3	2.2
3	13.8	20.5	7		3	20.4	27.2	11.5		3	22.2	28.5	17	2.1	3	22.3	31	10		3	13.2	18.5	9.5	11.4
4	12.3	20.5	2.5		4	21.1	28	12.3		4	15.9	23.4	11.6	1	4	22.8	30	15.9		4	10.4	16	3.4
5	14.9	24.2	6.5		5	21.3	28.5	13		5	11.1	16	5.5		5	21.7	28.5	14		5	10.9	21	2.9	0.8
6	15.4	25	5		6	20.9	27.2	15	6.2	6	14.1	25.2	1		6	21.1	27.5	14.4		6	13.4	21	3.9
7	17.8	26.9	6		7	21	29	13.1	1.8	7	20	26	15.8		7	18.4	24	14	1.8	7	12.1	19	3.2
8	19.7	26.5	13		8	16.3	22.8	12.5	6.2	8	14.2	17.5	10.2	9	8	13.7	19	10.2	0.5	8	15.2	26	6.9
9	14.6	22	11	4.2	9	14.7	19.5	9.5	15.3	9	14.7	20.5	5		9	16.6	24.4	5.5		9	18.6	30.5	8.8
10	13	19	9	0.6	10	17	23.7	8		10	13.6	18.2	11.2	2.9	10	18	26.5	11.3		10	19.8	31	9
11	11.3	18.8	3.5	0.4	11	18	26.6	9.4		11	16.4	23	10		11	15.5	23.5	8.8	1.9	11	18.9	30	9.2
12	9.9	13.5	4.5		12	18.8	25.5	12.8	3.3	12	22.8	31.5	12.5		12	16	20.5	11.4	2.7	12	12.7	18	7.8	0.3
13	10.7	18	0		13	19.4	27	12		13	25.1	34.5	14.7		13	14.6	19.6	10		13	6.9	10.5	4.4
14	12.1	16	8.5	3.7	14	15.4	22	11.9	5.3	14	24.9	34	17.6		14	12.6	17.5	7.5	0.4	14	8	12	4	0.8
15	13.8	19	10	9.5	15	13.5	18	9.5	0.3	15	22.9	29.5	15.2		15	14.4	24	4		15	6.5	16	-3
16	14.3	19.3	9	18.5	16	16.1	22.5	11.8	1.4	16	24.1	31	17		16	17.8	28.5	5.5		16	11.5	20	2.5
17	15.6	20	11.5	5.8	17	18.7	26.5	11	1	17	25.7	35	18		17	19.7	30	7		17	10	20.5	1.9
18	13.6	21	8	4.2	18	20.8	28.4	13		18	26.4	38.8	13		18	22.3	34.5	10		18	11.2	21.2	1.8
19	14.4	19	10.5		19	23.2	28.5	17		19	22.7	28.8	13.5		19	23.8	32.2	14		19	11.1	18.2	2.5
20	12.7	21	7	2.5	20	22.2	28	14.3	6.7	20	21.8	30	14		20	23.4	29.5	17.8		20	12.3	17.5	9.2	3.8
21	9.9	15	3.5		21	20.8	25.5	17	1.7	21	24.4	33.5	19		21	16.3	25	10.5		21	10.3	13.3	6.5	1.6
22	10.5	16	5	1.5	22	19.2	23.6	14		22	21.4	26.5	17.4	8.7	22	11.8	17	6.8		22	4.5	10.5	-2
23	10.5	15	5	2.1	23	20.2	26.5	13.8		23	22.3	30.5	13		23	13.3	23	2.5		23	5.9	16	-3.5
24	10.7	18.5	1		24	20.6	27	14.3		24	24.3	35.2	13.5		24	17	25.5	8.8		24	7.6	12	3.2
25	12.8	16.8	8	12.8	25	24.1	30.5	18.5		25	19.6	24.5	15.6	18.8	25	17	24.5	7		25	1.7	8.5	-5.5
26	13	19.6	4.2		26	20.9	26.5	15		26	20.7	29	12.6		26	10.3	20.5	8	1.8	26	3.5	9.7	-3.5
27	14.4	20.5	8		27	19.1	25.2	11.3		27	17.4	22.6	12.8	0.7	27	0.7	16.5	0.5		27	3.2	9	-4
28	16.8	24	8		28	19.8	26.4	12.3		28	16.7	23	9		28	10.5	22	-0.5		28	2.7	10.4	-6.5
29	17.2	23.7	9		29	21.4	30	13		29	16.7	22.5	8.8		29	15	26.8	3		29	7	17	-1
30	16.8	23.8	7.5	0.3	30	23.9	31.6	11		30	17.4	24.5	11.2		30	18.9	27.5	10.6		30	10.5	22.5	0
31	12.8	20	7.4	3						31	20.1	29	9.8		31	19.9	30	9.8
2016
May					June					July					August					September
Days	Temperature, °C			Rainfall, mm	Days	Temperature, °C			Rainfall, mm	Days	Temperature, °C			Rainfall, mm	Days	Temperature, °C			Rainfall, mm	Days	Temperature, °C			Rainfall, mm
	average	max	min			average	max	min			average	max	min			average	max	min			average	max	min
1	10.6	15.9	0.5	0	1	12	17.8	6.4	0	1	16.2	22.5	8.5	0	1	16.1	19.5	14	18	1	14	22	4.4	0
2	10.4	17.5	5.6	0	2	13.1	19.1	5.7	0	2	15.9	20	11.2	3	2	15.2	19.5	10.4	0	2	17.6	27	9	0
3	4.7	11.1	-0.4	0	3	11.6	15.5	9.7	7	3	16.4	21.8	12	11	3	17.2	22.6	12.4	0	3	18.9	28.5	10	0
4	6.7	13.7	-0.7	0	4	18.1	26.5	8	0	4	17.5	23.5	13.3	0	4	17.1	23.6	8.3	0	4	18.6	26.6	11.8	0
5	7.3	12.3	3.1	0.5	5	20.3	26.6	13.4	0	5	18.7	25	11.2	1	5	18.8	24.4	10.1	0	5	16.1	25.6	6.8	0
6	9.5	18.1	-1.7	0	6	18.1	24.7	9.8	0	6	18	22.7	12.6	0	6	19.4	26.1	13	2	6	15.7	24.5	7.5	0
7	13.3	21.5	1.5	0	7	21.1	27.5	11.1	0	7	20.6	27.5	13.6	0	7	19.9	28.2	13.2	0.6	7	18.1	27.5	8.5	0
8	10.8	13.4	6.2	15	8	19.3	24.5	16.1	5	8	22.7	30.1	14	0	8	17.1	22.6	11.8	0	8	19.3	29.4	13.2	0.3
9	5.1	10.2	2.8	0	9	18.7	24	13.9	0	9	18.2	25.8	14.3	9	9	19.7	27.1	10	0	9	15.2	22.5	11.2	2
10	7.9	13.6	1.5	0	10	21.7	28.5	12.7	0	10	20.1	26.5	9.9	0	10	20.3	25.5	15.3	0	10	18.4	27.2	10.8	0
11	11.6	20.5	5.8	2	11	23.8	31.8	17.7	7	11	22.7	29	13.8	0	11	18.6	24.9	11.5	0	11	14.8	27.7	7.4	0.3
12	10	16.6	2	0	12	19	23.8	15.5	0	12	24.6	31.2	16.4	0	12	19.1	25.2	10.7	0	12	11.2	16.1	5.1	0
13	13.8	22.2	4.6	0	13	18.8	25.1	8.5	0	13	25.6	33.5	17.9	0	13	18.2	24	11.3	0	13	12.7	19.1	7	0
14	16.6	24.6	7	0	14	20.4	25.6	13.2	0	14	17.7	22.5	15.7	14	14	19	25.3	12.3	0	14	11.9	21.2	2.2	0
15	13.3	16	11	10	15	20.2	25.8	13.4	0	15	19.5	26.4	14.7	3	15	17.8	24.8	8.8	0	15	17.4	26.8	8.8	0
16	4.5	11	3.3	5	16	19.4	24.8	14.8	0	16	17.6	21.9	15.5	17	16	19.1	26	10.3	0	16	19	28.9	9.1	0
17	6.3	12.4	-0.5	0.7	17	18.8	24.3	11.9	0	17	17.4	21	14.5	3.4	17	20	25.9	10.7	0	17	17.7	24.5	9.6	0
18	9.1	17	-0.9	0	18	15	19.9	12.9	2	18	17.2	20.9	13.9	5	18	20.1	27.1	12.4	0	18	13	21.2	3.4	0
19	12.7	20.1	1.3	0	19	15.2	21.9	10.5	1	19	18.2	23.7	13.5	0.7	19	19.6	27.7	10.8	0	19	13.8	24	3.4	0
20	14.3	21.8	4.3	0	20	16.1	22	7.9	0	20	18.7	24.6	13	0	20	18.6	24.8	13.2	0	20	15.5	25.1	5.9	0
21	16	23.5	4.6	0	21	15.7	21.7	12	1	21	18.7	26.1	12.9	0	21	14.2	20.1	8.1	0	21	13	20.1	8.5	0
22	17.2	23.7	9.3	0	22	16.2	22.4	11.9	7	22	17.5	21.5	15.9	3	22	13.2	20.2	5.7	0	22	11.3	18.6	3.6	0
23	17.1	23.5	9.9	0	23	18.2	25	11.6	0.7	23	19.2	24.5	15.7	30	23	13.9	20.6	5.3	0	23	10.8	17.5	3.2	0
24	17.8	25	10.3	0	24	16.2	21.7	13.7	12	24	20.5	26.5	14.4	0	24	17.2	25.2	6.9	0	24	10.3	18.2	5.6	0
25	19.8	26.8	12.9	0	25	19.4	26.4	12.5	0.4	25	21.2	29.4	16.5	0.3	25	19	27.5	9.5	0	25	9	17.1	0.4	0
26	20	26.3	12.3	0	26	19.4	27.2	15.8	8	26	20	28.2	14	1	26	18.1	27.7	10	0	26	9.6	18.1	1	0
27	17.6	25.5	9.8	0	27	15.5	20	12	0	27	19.2	26.4	15.7	15	27	20.2	30	9.5	0	27	12.1	21.9	1.8	0
28	18.9	26.5	9.5	0	28	17.7	24.5	10.3	0	28	16.1	20.1	13.5	0.4	28	18.7	25.6	12	0.3	28	14.5	22.5	8	0
29	17.6	26.3	11.5	2	29	18	23.5	11.5	11	29	15.7	21.4	12.5	0.5	29	15.1	23.8	5.9	0	29	12.9	20.1	4	0
30	17.5	23.3	11	0.3	30	16.7	22.8	8.6	0	30	15.2	20.1	12	8	30	13	18.7	5.7	0	30	9.7	12.8	8	15
31	15.3	22.8	8.7	2						31	18.9	25.8	9.7	0	31	10.2	17.2	2.8	0
среднее	12.6871			37.5	среднее	17.79			62.1	среднее	18.8935			125.3	среднее	17.5387			20.9	среднее	14.4033			17.6
2017
May					June					July					August					September
Days	Temperature, °C			Rainfall, mm	Days	Temperature, °C			Rainfall, mm	Days	Temperature, °C			Rainfall, mm	Days	Temperature, °C			Rainfall, mm	Days	Temperature, °C			Rainfall, mm
	average	max	min			average	max	min			average	max	min			average	max	min			average	max	min
1	4.3	11	-3.1	0	1	18.5	25.7	9.6	0	1	22.3	28.9	17	0.7	1	20.7	27.5	12	0	1	20.7	28.5	10.2	0
2	9	17.1	-0.9	0	2	19.1	27.1	11.1	0	2	18.7	27.3	10.7	0.4	2	21.8	31	12	0	2	21.9	31.1	12.1	0
3	13.7	22.6	4.5	0	3	21.9	29.3	12.5	0	3	22.4	28.3	17	0	3	25.2	33.8	16.7	0	3	22.8	33	13.7	0
4	15.3	23.6	6.2	0	4	23.2	30.1	16.6	0.1	4	24.2	35.4	15.9	6	4	25.4	34.1	17.1	0	4	23.2	33.5	11.7	0
5	17.5	25.4	8	0	5	17.7	23.6	13	0	5	21.8	27	15.1	0	5	22.2	29	15.7	0	5	24.4	32.8	17.9	0
6	15.9	22.4	8.3	0.3	6	13	17.2	10.8	15	6	21.2	30	11.7	0	6	26.4	36	18.1	0	6	21.3	26.7	16.7	0
7	9.7	17.4	0.5	0	7	13	20.2	8	19	7	25	31.1	19.5	0	7	25	30	20.6	0.3	7	13	16.7	10.2	0.7
8	14.2	22	6.8	0	8	17.7	24.8	10.5	0	8	20.7	28.2	10.4	0	8	20	26.3	11	0	8	12	18.8	5	0
9	14.3	24.3	3	0	9	19.1	25.4	15	0	9	25.1	36	17	0	9	22.2	30.8	12.5	0	9	15.8	24.9	7.5	2
10	18.5	27.4	11.1	2	10	13.8	17.5	10	0.7	10	21.7	30.6	15.4	0	10	18.7	27	14.6	0.3	10	15.3	22.1	13	1
11	18.3	25	11.7	0	11	14.2	20.6	8.1	0	11	18.9	27.1	10.7	0.8	11	11.4	19.6	8.9	9	11	11.4	13.6	9.6	3.8
12	21	28.3	11.8	0	12	15.6	23.4	7.1	0	12	19.7	25.7	13.9	0	12	10.9	15.5	6.8	0.6	12	5.8	10.2	3.5	10
13	19.1	29	11.3	0	13	20.5	27.7	13	0	13	16.8	25	10.5	3	13	14.9	23	4.4	0	13	6.4	10.8	3.5	0
14	17.6	22	12.4	0	14	23.6	32.3	15.6	0	14	14.8	20.2	11.5	0.1	14	17.7	26	8.8	0	14	11.6	19.2	5.5	0
15	10.2	16.6	8.1	2	15	24.6	31.3	17.8	0.3	15	17.5	25	10.6	0	15	16.2	21.4	9.6	0	15	13.8	22.2	5.5	0
16	10.3	18.2	1.5	0	16	24.9	32.6	16.2	0	16	17.4	25.4	10	3	16	14.4	21.2	6.5	0	16	14.2	26	5.3	0
17	5.6	12.5	-1	0	17	25.5	33	16.8	0	17	15.8	22.6	10.6	3	17	15	20.5	8.6	0	17	17.6	27.5	7.1	0
18	7.4	13.6	2	0	18	26.5	33.6	18.3	1	18	14.8	20.4	10.4	1.7	18	16.4	22	13.6	0	18	16.7	26.4	8.2	0
19	9.2	17.4	-0.8	0	19	21.3	29.2	15	0.5	19	15.7	24.4	7	0.9	19	15.7	21	9.6	0	19	11.4	17.1	4.5	0
20	12.7	21	4.1	0	20	21.3	28.2	15.8	0	20	17.9	26.8	11.2	4	20	14.6	20.6	5.7	0	20	12.3	22.7	2.4	0
21	15.3	24.5	5.8	0	21	22.1	28.4	13.8	0	21	18.2	27	10.8	0.3	21	15.2	24	5	0	21	17.9	26.3	10.3	0
22	18.4	27.2	9.3	0	22	22.7	29.8	13.4	0	22	19.5	26.2	11.9	0	22	17.1	25	8.9	0	22	10.5	18.6	6.8	0
23	21	28.4	13	0	23	20.6	27.2	18.3	1	23	22.6	30.5	13.5	0	23	19.3	26.8	9.8	0	23	1.6	6.8	0	0.4
24	17.5	24.4	12.5	0	24	19.7	27.6	13.7	0	24	26.2	35.3	16.8	0	24	19.1	25.5	10.5	0	24	0.5	5	-1.7	0
25	12.2	18.2	4.5	0	25	22.8	28.8	15.2	0	25	24.1	33	14.8	0	25	20	28.1	10.8	0	25	1.2	9.1	-5.6	0
26	13.9	22.6	3.3	0	26	23.6	31.7	15.6	2	26	28	35.3	20.8	0	26	20.8	29	12.4	0	26	3.4	8	0.2	0
27	17.5	25.4	10.8	0	27	17.3	24.1	15.4	0.4	27	22.7	29.5	15	0	27	20.9	28.6	11.6	0	27	3.8	9.5	-2	0
28	18	23.1	13.9	0.7	28	17.8	26.4	8	0	28	20.3	25.5	13.6	2	28	22	30.7	14	0	28	1.8	5.5	0.5	5.6
29	15.4	23	10.5	4	29	21.3	29.4	11.5	0	29	19.9	28	11	0	29	22.6	30.8	13.5	0	29	1.7	4.2	0.1	0.3
30	8.9	13.3	5.3	8	30	24.2	32.5	15.6	0	30	21.8	30.3	11.6	0	30	21.3	29.4	11.5	0	30	3.3	7	-0.8	0
31	13.4	22.4	4.5	0						31	20.7	26.4	13.1	0	31	22.2	29.6	14.6	0
среднее	14.0419			17	среднее	20.2367			40	среднее	20.529			25.9	среднее	19.2032			10.2	среднее	11.91			23.8
2018
May					June					July					August					September
Days	Temperature, °C			Rainfall, mm	Days	Temperature, °C			Rainfall, mm	Days	Temperature, °C			Rainfall, mm	Days	Temperature, °C			Rainfall, mm	Days	Temperature, °C			Rainfall, mm
	average	max	min			average	max	min			average	max	min			average	max	min			average	max	min
1	9	12.4	5	0	1	17.5	24.4	9.6	0	1	21	27	16.3	0	1	19.2	25.4	13.2	0	1	7.1	10.5	4.8	2.4
2	6.5	9.6	3.8	6.9	2	19.1	27.4	13.1	0.6	2	19.5	24.9	15.5	8	2	18.4	23.6	14.6	0	2	5.8	9.6	3.8	3.3
3	6.4	12.4	0.5	0	3	9.4	16.1	3.5	0.4	3	20.5	26.4	14.4	0	3	19.1	26.8	14.8	9.6	3	9	14.1	3.6	0
4	15.2	23.4	7	0.7	4	15	21.5	9.4	0	4	17.2	21.9	11.3	0	4	20.4	27.9	13.6	0	4	10.7	16.7	4.5	0
5	7.1	19	2.7	0.3	5	19.1	26.2	10.4	0	5	19.5	27	11.2	0	5	20.1	29.8	14.1	4	5	11.4	17.4	6.9	0
6	-0.1	2.7	-0.9	3	6	21.8	29.7	13	0	6	22.9	30.1	15.2	0	6	19.7	25.9	14.5	0.5	6	11.2	18	5	0
7	2.5	9.7	-4.6	0	7	23	31.4	14.1	0	7	24.8	29.4	21.7	0	7	20.3	26.7	15.8	8	7	12.7	18.6	7.8	5
8	9.1	15.8	3.6	0	8	23.5	29.9	17.7	3	8	23.4	28.3	17.2	0	8	21.2	28.1	13.4	0	8	11	16	7	1
9	7.1	11.5	3.4	0.8	9	13.3	17.7	8.9	6	9	24	30.5	15.5	0	9	24.3	31.8	15.7	0	9	11.6	18.6	5.2	0
10	10	20.5	0	0	10	13.4	19.2	8.5	0	10	22.1	27	17.7	0	10	25.5	35.1	18.1	0	10	12.1	19.2	8	0.6
11	14.2	24.2	10.4	1.5	11	17	24.8	8.1	0	11	20.8	25	17.8	0.5	11	18.1	21.8	15.6	0.6	11	7.2	11.6	2.9	0
12	11.1	16.4	8.2	0	12	19.8	27.6	13.4	0.3	12	20.1	28.3	13.5	0	12	15.2	19.1	12.2	2	12	5.5	12.7	-3.5	0
13	6.2	12.2	1.7	0	13	15.8	21.6	8.9	0	13	20.9	29.1	14	0	13	13.7	22.4	4.2	0	13	10.1	18.2	1.8	0
14	6.8	14.6	-1.9	0	14	14.4	21.2	4.2	0	14	21.7	28.8	15.9	0.6	14	18.2	27.1	8.1	0	14	11.5	20.9	1.3	0
15	9.1	13	4.8	0.4	15	17.8	25	8.9	0	15	20.9	26.6	16.4	0	15	20.9	29.4	12.8	0	15	14.8	21.1	10.9	0.1
16	10.5	20.2	-0.3	0	16	21.1	27	13.9	1	16	20.3	24.9	16.6	0	16	21.3	30.4	14.4	4	16	11.4	19.2	3	0
17	5.1	16.3	1.5	0.5	17	21.3	29.6	12.3	0	17	20.3	26	13.2	0	17	17.9	24.5	11.8	4	17	11.7	18.1	5.8	0
18	7.2	15.8	-2.7	0	18	17.7	23.7	14	4.6	18	20.6	27.2	12.5	0	18	20.8	28	13.5	0	18	10.8	18.3	2.9	0
19	7.2	13.7	1	0	19	16.9	21.5	11.3	5	19	21.9	29	12.7	0	19	22.2	31	16.4	2	19	12.1	21	5.4	0
20	10.7	20.8	-0.4	0	20	18.9	24.5	11.5	0	20	23.8	31	15.4	0	20	19.7	25.4	14.8	0.4	20	16.2	23.6	10.4	0
21	17.5	25.7	8.8	0	21	21.7	28.8	14	0.6	21	24.6	32.1	16.6	0	21	11.6	17.2	8.6	16	21	10.5	16.4	7.6	4.9
22	17.8	26.9	10.4	0.6	22	23.6	29.8	19.1	0	22	17	21.5	13.1	4.4	22	14.6	20.1	8.6	0.4	22	11.6	17	7.9	0
23	6.2	12.5	4.4	1.4	23	20.8	25.9	14.2	0	23	11.2	14.6	9.1	11.3	23	18.4	26.7	12.5	0	23	8.5	12.1	6.8	17
24	7.4	16.3	-1.9	1	24	18.9	24.8	11.6	0	24	11.1	15.7	8.9	1.7	24	16.9	22	13.4	5	24	8	12.6	5.1	0
25	18.4	27.7	10.7	0.1	25	17.1	22.6	12	1	25	14.9	21.7	7.4	0	25	11.8	15.2	9.8	9	25	9.2	17.3	1.2	0
26	22.2	29.2	14	0	26	15.6	20.1	12.9	5	26	18.2	23	11.7	0	26	11.4	14.6	9.9	15.8	26	12.2	20.6	3	0
27	16	24.8	2.8	0	27	16.7	21	12.1	0	27	19.5	25.8	13.2	0	27	11.7	16.8	8	0.3	27	13.6	21.3	4.9	0
28	8.7	16.8	0	2	28	15.9	20	13.4	6	28	17.5	22.6	10.4	0	28	14	18.6	10.4	0.8	28	15.1	23.2	6.4	0
29	15.1	20	8.4	0	29	17.7	23.2	15.1	10	29	18.2	24.6	9.9	0	29	11.9	14.6	10.6	3	29	9.6	15.9	3.5	0
30	9	17.5	5.9	4	30	21.5	28.3	14.1	0	30	19.9	27.3	9.8	0	30	13.2	18.3	11	3	30	10.4	21.8	0.3	0
31	11	18.9	3.3	0						31	20.4	26.5	12.6	0	31	12.4	18.5	8.8	1
среднее	10.0065			23.2		18.1767			43.5		19.9581			26.5		17.5516			89.4		10.7533			34.3
2019
May					June					July					August					September
Days	Temperature, °C			Rainfall, mm	Days	Temperature, °C			Rainfall, mm	Days	Temperature, °C			Rainfall, mm	Days	Temperature, °C			Rainfall, mm	Days	Temperature, °C			Rainfall, mm
	average	max	min			average	max	min			average	max	min			average	max	min			average	max	min
1	-0.1	6.5	-4.7	0	1	19.5	28.4	8.7	0	1	19.3	27.2	11.9	0	1	28.7	36.4	20.6	0	1	9.1	15	6.9	2
2	3.4	9.3	-2.4	0	2	20.7	26.9	12.9	0	2	21.8	30.1	15.8	0	2	25.6	30.2	22.1	0	2	10.2	14.6	6.3	0.9
3	5.9	11.8	-0.9	0	3	19.5	26.5	10.9	0.6	3	20.7	24.1	17	0	3	19.1	27.5	10.5	0	3	9.9	18.9	1.4	0
4	7.8	16.5	-2.7	0	4	18.9	26.9	9	0	4	20.7	26.4	15.9	0	4	21.2	30	12	0	4	14.1	22.5	8.7	3
5	12	20.3	2.8	0	5	18.2	23.2	12.2	0.5	5	20.5	27.9	11.7	0	5	24.5	32.4	15.5	0	5	14.6	19	11.5	1
6	14.5	22.9	3.9	0	6	10	14	5.1	0.5	6	24.1	32.4	16.6	0	6	27.6	35.6	18.6	0	6	9.7	13.1	8.5	5.6
7	17	24.9	9.4	0	7	13.6	17.3	9.5	4.4	7	21.4	26.5	15.6	0	7	27	34.3	20.5	0	7	9.9	14	7.5	3
8	17.8	25.3	7.4	0	8	12.6	16.3	10.6	4.9	8	20.5	28.2	14.1	1	8	21.1	27.5	12.5	0	8	10.3	14.3	8.6	4.3
9	18.2	25.8	9.4	0	9	11.8	14.7	9.4	3.9	9	21.4	29.8	12.6	0	9	19.2	25.3	11.6	0	9	9.7	14.5	6.5	5.7
10	19.3	27	9.9	0	10	12.5	17.4	10.2	1.4	10	19	26.7	10.4	0	10	17.8	26	7.5	0	10	11.1	15.6	6.8	0.5
11	16.7	22.7	8.5	0	11	13.6	20.7	8	7	11	23.2	31.2	14.6	0	11	21.7	31	11.3	0	11	12.1	17.5	8.1	1
12	16	25.3	5.2	0	12	17.3	22.1	13.4	3	12	24	30.6	16.6	0	12	24.9	33	17	0	12	10.1	16.5	4.5	0
13	13.9	20.1	6.5	0	13	20.8	29	13.5	0.6	13	22.5	29.4	15.5	0	13	23.3	27.4	18	0	13	11.8	19.2	4.5	0
14	12.4	22.8	3.4	7	14	15.5	23.5	11.6	0.4	14	23.3	30.7	15	0	14	19.6	27.6	12	2	14	13.3	20.2	7.7	0
15	4.1	11.9	-1.1	0	15	10.6	12.1	9.1	0	15	24.4	32.5	13.5	0	15	18.6	24.5	13.6	0.7	15	13.2	22.1	4.3	0
16	5.1	11.6	-2.2	0	16	10.3	14.9	7	10.8	16	27.2	35.4	19.1	0	16	16.9	23.7	10.4	0	16	15.9	23.9	8	0
17	8.9	17.4	-0.2	0	17	13.7	21.5	5.5	0.4	17	25.9	33.8	16.2	0	17	16.5	22.4	10.5	0.7	17	16.9	23.7	11.3	0
18	14.3	23	4.9	0	18	13.6	17.8	10.3	1	18	22.3	30	13.4	0	18	18.6	26.5	11.8	0	18	18.4	26.3	13	0
19	13.4	19.1	7.5	0.3	19	15.8	21.5	9.9	0	19	23	29.1	16	0	19	19.4	27.5	10.5	3	19	19.6	29	10.9	0
20	14.3	22.3	6.5	2	20	16.8	23.4	9	0	20	22	29.5	13	0	20	18.7	24.1	14.2	0	20	15.9	22	11.4	0
21	8.9	14.7	3.6	0	21	19.2	26.5	11.8	0	21	23.4	31.5	14.6	0	21	16.6	25.5	10	6	21	13.3	23.5	4.4	0
22	8.3	12.6	3.9	0	22	19.1	25	10.4	0	22	24.1	30.6	20	0	22	14.3	17.5	11.8	5	22	22.2	32.2	14	0
23	9.1	15.3	2.4	0.1	23	15	19.6	8.8	0	23	20	26.5	15.5	2	23	13.1	21.5	5.6	0	23	11.1	24.7	5.9	5
24	15	22.1	9	0	24	17.1	23.5	14.2	5	24	18.2	24.9	13.3	1.7	24	16.2	25	7.1	0	24	11.1	16.1	8	0
25	15.9	23.8	9.4	0	25	20.4	27.2	13.1		25	18.3	24.5	12.5	0	25	18.5	28.4	9	0	25	7.7	12.6	4.8	1
26	7.7	16.1	-0.2	0	26	24.7	34.1	15.9		26	16.8	23.8	10.6	0.2	26	21.7	31	12.6	0	26	6.6	12.5	2.9	0.3
27	12.3	20.4	2.5	0	27	20.6	28.5	17	6	27	17.3	24.4	10	0	27	19.8	24.6	16.4	0	27	8.7	12.4	3.2	2
28	16.5	25.1	6	0	28	16.1	25	11.3	3.5	28	22.2	31.1	12.7	0	28	15.8	26.1	6.5	0	28	5	10.2	0.5	0.4
29	18.9	27.2	9.5	0	29	15.6	19.5	11.2	4	29	25.2	34.1	17.6	0.5	29	21.3	28.8	15.1	0	29	4.1	7.4	1	0.9
30	19.6	25.4	14.5	0	30	17.2	24.1	11	0	30	24.8	31.2	18.3	0	30	17.1	23.6	13.3	0	30	-0.3	5.9	-6.1	0
31	18.2	25.5	8.1	0						31	26	34.3	17.1	0	31	9.5	16.8	7	5.3
среднее	12.429			9.4		16.3433			57.9		22.0484			5.4		19.8032			22.7		11.51			36.6
2020
May					June					July					August					September
Days	Temperature, °C			Rainfall, mm	Days	Temperature, °C			Rainfall, mm	Days	Temperature, °C			Rainfall, mm	Days	Temperature, °C			Rainfall, mm	Days	Temperature, °C			Rainfall, mm
	average	max	min			average	max	min			average	max	min			average	max	min			average	max	min
1	12	19.6	3.6	0	1	26.6	35.1	18.1	0	1	24.6	30.2	18.9	0.1	1	21.1	28.3	12.8	0	1	19.7	28.6	9	0
2	13.8	22	3	0	2	23.5	29.8	16.8	0	2	22.3	30.3	17.6	3	2	23	29.1	16.1	0	2	19.7	30	10.4	0
3	15.1	21	11.6	4	3	18.8	25.6	14.9	0.5	3	15.8	21.1	12	2.5	3	21.8	27.9	14.9	0	3	17.4	25.6	12.2	0.7
4	7.9	12	3.7	1	4	15.6	21.4	10.1	0	4	17.5	23	13	24	4	21.2	26.9	13.6	0	4	10.4	14.5	7.3	0
5	6.2	13.1	-1.5	0	5	11.4	18	4	0	5	17.9	22.9	14	0	5	22.7	29.5	16.5	0	5	7.5	11.5	2.1	0
6	8.8	17.3	-0.5	0	6	13.5	21.3	3.8	0	6	18.5	24.1	12.5	0	6	21.6	28.4	16	0	6	8.2	11.5	6.1	0
7	13.9	23.5	5	0	7	17	25	6.8	0	7	19.6	25.5	12.9	0	7	23.2	30.5	17.1	0	7	9.7	15.4	2	0
8	18.1	24.8	10.7	0	8	18.8	27	8.5	0	8	18.8	27.1	12.7	0.3	8	24.6	31.5	19.8	0	8	7.3	13.4	1.2	0
9	18.4	27.5	11.3	0	9	20.4	28.4	11.6	0	9	20.3	26.8	12.6	0	9	22.1	28.5	18.5	2	9	9.6	15	5.5	0
10	19.6	27.2	12.1	0	10	19.9	26.3	12.1	0.3	10	19.8	29.4	13.5	6	10	22.2	31.4	16.6	0.4	10	9.2	17	-0.6	0
11	20	28	13.2	0.3	11	20.9	29	12.7	0.4	11	19.3	24.2	14	0	11	18.3	25.3	13.5	1.4	11	12.9	22.2	4.3	0
12	19.6	29	9.4	0	12	22.3	30.5	12.3	0	12	18.5	29.3	11.8	3	12	15	19.1	12.5	37	12	14.5	23.5	9	0
13	21.8	29.3	12.5	0	13	23.4	32.5	14.5	0	13	19.8	25	15.1	0	13	15.5	20.3	14.1	2	13	13.9	24.5	3	0
14	20.5	28.4	15.5	10	14	19.2	21.9	14.7	0	14	20.3	27	12	0	14	15.8	20.4	13.5	0	14	15.5	25.4	6	0
15	15.5	20.6	12.1	3	15	16	22.1	10.1	0	15	22.4	28.1	15.3	0	15	16	23	9.4	0	15	17.3	25	11.8	0
16	15.3	23.2	8.8	5	16	14.6	20.1	10.6	4	16	21.9	28.2	14.5	0	16	19.9	29.6	12.6	0	16	12.3	17.3	9.4	2
17	16.7	24.2	10.5	7	17	13.9	18	10.5	0.9	17	23.6	31.1	16.1	0	17	19	24.9	13.5	7	17	9.1	13.9	6.5	7
18	17.1	23.5	13.1	0.9	18	15.9	25.6	8.7	1	18	25.1	32.2	19.8	0	18	17.2	22.4	11.1	0.4	18	9.8	14.1	7	2.8
19	14.5	17	12.5	0.4	19	12.3	16	9.3	9	19	24.6	31	19.8	0	19	16.6	22.5	12.5	1	19	13.5	20.5	9.8	0
20	13.4	20.7	7	0.9	20	10.8	16	5.5	0	20	23.1	29.9	15.6	0	20	14.7	20.7	8.5	0	20	14	22.1	5.4	0
21	12.6	16.8	8.5	6	21	14.8	24.1	5	0	21	21.3	29.1	15	0.7	21	14.2	20.4	6.5	0	21	12.5	17.1	8.3	0
22	13.6	20.8	5.8	0.1	22	20.1	28.4	8.6	0	22	18.5	23.9	14	4	22	15.4	21.2	12.6	0.7	22	6.1	9	4.4	3
23	19.9	26.4	13	0	23	23.1	31.5	15.1	0	23	20.5	28.4	12.5	0	23	14	23.1	6	0	23	7.1	11.6	3.7	6
24	22.3	31	12.7	0	24	16.1	25	9.7	2	24	20.6	27.7	16.8	4.4	24	13.1	19	8.1	8	24	6.2	9.3	4.1	6.4
25	25.6	32.9	16.4	0	25	18.6	27.6	8	0	25	20.3	25.6	15.3	0.5	25	14.2	19.6	11	18	25	4.9	7.8	3	1
26	25.6	33.6	14.9	0	26	23.1	31	16.6	0	26	18.5	24.5	13.2	0	26	14.8	23	6.1	0	26	5.5	10.5	1.5	2
27	17.1	22	11.6	0	27	13.2	23.4	8.4	26	27	19.3	26.9	14	2	27	17.1	25.2	9.9	0	27	6.6	11.5	1.2	0
28	16	23.8	7.8	0	28	13.1	19.9	8	6	28	16.5	23.5	13.2	16	28	15.2	22.5	6.8	0	28	6.5	12.9	0.5	0
29	19.5	28.1	9.9	0	29	17.4	23.5	14.8	10	29	16.3	23	12.5	2.9	29	16.2	25	6.7	0	29	8.9	16.7	3.5	0
30	20.5	30	11.1	0	30	22	30.8	12.7	6	30	17.5	24.9	11	0.3	30	18.4	26.5	9.5	0	30	4.8	13	0	0
31	22.6	31.8	12.8	0						31	19.8	28.6	10.6	0	31	19.6	28	11.2	0
среднее	16.8871			38.6		17.8767			66.1		20.0903			69.7		18.1839			77.9		10.6867			30.9

## Sheet: Kyzylorda 2013-2020
Meteo data from 2015-2020 years for Kyzylorda, South Kazakhstan region (Kazakh Rice Research Institute)
2013
	April				May					June					July
Days	Temperature, °C			Rainfall, mm	Days	Temperature, °C			Rainfall, mm	Days	Temperature, °C			Rainfall, mm	Days	Temperature, °C			Rainfall, mm
	average	max	min			average	max	min			average	max	min			average	max	min
1	4.4	10.1	-1.2	0	1	19.6	27	11.9	0	1	28.9	34.8	23.2	0	1	29.9	37.6	22.4	0
2	7.6	16.3	-0.3	0	2	21.6	29.5	11.7	0	2	27.2	33.3	19.8	0	2	27.4	34.5	18.5	0
3	10.5	17.7	2.4	0	3	20.1	30.2	13	0	3	25.6	33	18.8	0	3	20.2	27.1	12.6	0
4	13.1	19.9	6.6	0	4	15.6	24.3	7.7	0	4	23.1	29.2	17	4	4	22.6	29.1	14.7	0
5	13.9	22.6	5.4	0	5	18.5	25.9	8.2	0	5	18.6	23.1	14.8	0	5	23.9	29.8	15.1	0
6	15.4	24.5	7.5	0	6	20.6	28.2	11.3	0	6	22.5	30.2	12.4	0	6	25.8	32.9	17.3	0
7	14.9	24.3	6.2	0	7	21.5	30.7	12.6	0	7	25.6	33.4	15.2	0	7	27.8	34.9	20.3	0
8	17.7	27.8	5.8	0	8	23.2	32.8	10.9	0	8	28.6	36.5	19.3	0	8	29.7	36.8	20.6	0
9	20	29.6	10.6	0	9	16.8	21.5	10.9	0	9	30.1	38.2	23.6	0	9	28.7	36.6	22	0
10	21.3	32.7	11.3	0	10	19.2	26.7	10.2	0	10	26.7	32.8	19.3	0	10	29.6	36.2	22.3	0
11	23.1	33.3	11.5	0	11	20.9	28.7	12.4	0	11	26.6	33.8	17.5	0	11	30.7	38.6	22.7	0
12	25.7	35.6	17	0	12	23.7	32.3	14	0	12	26.7	32.1	19.7	0	12	30.1	36.7	22.9	0
13	21	27.5	15.2	0	13	20.3	27.5	10.9	0	13	26.4	33.1	18.4	0	13	27.2	33.2	22.9	0.7
14	15.8	24.9	11.5	14	14	21.2	30.5	11.7	0	14	27.4	35.3	18	0	14	27.7	33.9	21.5	0
15	11.8	17.2	7.2	1	15	22.9	30.8	12.5	0	15	27.6	35.6	21.8	2	15	27	34.1	18.1	0
16	8.4	12.9	4.7	0.7	16	24.7	33.6	14.4	0	16	21.8	28.2	16.4	3	16	29.2	36.4	22.2	0
17	5.8	9.6	2.8	0.3	17	26.2	34.2	16.8	0	17	21.1	28	13	0	17	25.8	32.9	17.1	0
18	9.4	15.8	2	0	18	26.4	33	17.1	0	18	24.9	32.5	15	0	18	27.9	35.3	19.2	0
19	13.4	20.8	5.6	0	19	17.3	26.8	14.4	4	19	27.5	35.4	17.3	0	19	29.8	37.2	22.2	0
20	14.8	23.1	5.2	0	20	15.9	20.1	12.3	0	20	29.2	36.4	19.4	0	20	29.3	36.3	26.3	0
21	16.1	23.4	6.6	0	21	16.5	24.1	6.6	0	21	30.8	38.2	22.3	0	21	26	32.2	18.9	0
22	19.8	29.1	12.5	0	22	20.8	27.7	12	0	22	31.5	39.5	21.9	0	22	28.5	36.1	19.8	0
23	16.8	22.1	11.6	3	23	21.1	28.7	13.4	0	23	31.3	39.5	23.7	0	23	30.2	37.8	21.3	0
24	18	14.15	22.4	26.84	30.28	20.3	28.5	11.7	0	24	28.1	26	8	7.9	0.5	32	39.8	23.3	0
25	19.3	13.39	20.09	25.67	30.82	20.8	27.3	13	0	25	28.6	25.6	0.3	0	3	32.7	39.8	25.2	0
26	11.9	14.07	22.04	27.47	31.7	22.5	29.5	13.3	0	26	27.6	5	6.7	3.4	2.6	33.5	42.1	26.7	0
27	14.7	20.4	23.25	22.17	29.69	24.1	32.8	14.2	0	27	27	32.7	25.4	4	4	29.7	34.6	25.5	0
28	13	19	7.9	0	28	27.3	35.8	16.4	0	28	24	29.8	19.4	0.3	28	28.2	34.7	20.8	0
29	17.1	25.4	10.5	0.7	29	29	37.6	18.8	0	29	25.4	32.3	19.9	0.3	29	30.2	37	22.2	0
30	20.4	28.5	11.5	0	30	30.4	38.6	20.8	0	30	29.1	36.7	20.3	0	30	32.6	40.8	23.4	0
31					31	31.5	39.5	22.3	0	31					31	31.6	40.1	26	0
2014
	April				May					June					July
Days	Temperature, °C			Rainfall, mm	Days	Temperature, °C			Rainfall, mm	Days	Temperature, °C			Rainfall, mm	Days	Temperature, °C			Rainfall, mm
1	5.9	10.5	2.8	5	1	21.5	33.2	8.8	0	1	18.8	25.9	10.8	0	1	24.7	28.8	21.2	0
2	4.2	7.4	2	0.4	2	25.2	34.4	14.5	0	2	19.7	26.3	12	0	2	24.7	32.2	16.1	0
3	7.5	15.8	-0.4	0	3	26.7	35.6	16.7	0	3	21.9	29.2	12.4	0	3	27.5	34.9	18.8	0
4	7.2	13.8	3.2	0	4	27.6	35.9	17.2	0	4	23.5	31.5	14.2	0	4	26.7	33.3	19.4	0
5	5.4	13	-1.5	0	5	27.4	36.2	17.8	0	5	24.9	32.4	16.6	0	5	27.2	34.1	18.9	0
6	10.5	19	1	0	6	27.6	37.5	17.1	0	6	24.7	32.1	16.1	0	6	28.7	36.3	20.1	0
7	4.9	8.4	0.8	8	7	26.5	34.3	18.8	0	7	26.2	33.8	16.4	0	7	30	37.3	20.5	0
8	8.2	14.3	1.8	0	8	24.7	32.8	16.5	0	8	27.5	34.3	19.1	0	8	30.7	38.8	22.1	0
9	16.3	25.5	7.5	0	9	24.6	33.1	16.5	0	9	24.6	31.9	17.8	0	9	30.8	38.3	21.7	0
10	16	20.5	13	2.9	10	21.7	28.6	14.8	0	10	26.6	34.6	17.5	0	10	31.8	40.7	22.7	0
11	11.3	17.4	6.1	0	11	20.5	26.5	14.4	0	11	29.3	38.4	21	0.1	11	31.2	37.3	24.8	0
12	5.3	9.5	2.5	0	12	20	27.3	10.2	0	12	30	38	22.4	0	12	27.6	33	20.7	0
13	2.9	8	-2.5	0	13	23	31.2	13.2	0	13	31.9	40.1	23.4	0	13	23.4	28.4	18.4	0
14	6.2	12.9	-1.2	0	14	26.9	35.2	17.6	0	14	28.7	35.4	22.2	0	14	22.6	29.8	14.5	0
15	9.4	16.6	2.6	0	15	27	35.4	18.5	0	15	25	31.8	17.8	0	15	23	29	15.8	0
16	11.7	18.4	6	0	16	25.1	32.6	15.7	0	16	27.9	35.4	18.9	0	16	23.6	30.3	15	0
17	12	18.4	5	0	17	25.8	33.4	15.1	0	17	30.7	38.1	22.6	0	17	25.2	32.4	17.2	0
18	14.9	23.6	5.5	0	18	27.6	35.7	18.3	0	18	31.5	39.6	23	0	18	27.5	35.8	17.3	0
19	17	25.5	6.9	0	19	21.6	27.3	12.9	0	19	31.6	39.8	22.1	0	19	30.3	38.2	20.4	0
20	17.9	26.9	8.3	0	20	14.4	21.7	6.3	0	20	32.8	41.4	23.3	0	20	30.4	38.8	22.3	0
21	18.2	25	11.3	0	21	16.9	22.4	11.2	0	21	33.7	42.8	24.7	0	21	22.6	28.8	17.8	0
22	12.7	17	7.8	0	22	17.9	25.3	7.3	0	22	32.6	39.7	25.4	0	22	23.3	29.8	16.3	0
23	10	18.4	2.4	0	23	24.4	33.6	15.1	0	23	30	36.7	21.6	0	23	25	32.4	17.5	0
24	14.5	24.1	4.2	0	24	27.5	36.2	17.5	0	24	29.9	37.8	21.8	0	24	24.3	31.8	15.5	0
25	10	14.7	5.4	8	25	29.3	37.7	21.9	0	25	32	39.6	22.9	0	25	26.3	33.8	17.3	0
26	8.9	15.3	3	0	26	28.9	36.8	19.1	0	26	33.2	41.4	23.8	0	26	28.8	37.7	21.3	0
27	11.4	19.5	6.1	0	27	30.1	38.8	21.2	0	27	34.5	41.5	26.3	0	27	28.7	37	20.8	0
28	9.1	15.4	2.7	0	28	32.4	40.1	24.4	0	28	33	38.3	27.4	0	28	22.3	26.8	18.2	0
29	12.1	19.6	2.3	0	29	23.2	29.9	16.8	0	29	32.2	39.8	23.5	0	29	20.6	26.3	13.5	0
30	16.5	26.2	7.5	0	30	14.6	21.3	8.4	11	30	32.5	40.4	24.5	0	30	22	29.1	13.9	0
31					31	16.5	22.6	9.1	0	31					31	23.2	30.3	14.8	0
2015
	April				May					June					July
Days	Temperature, °C			Rainfall, mm	Days	Temperature, °C			Rainfall, mm	Days	Temperature, °C			Rainfall, mm	Days	Temperature, °C			Rainfall, mm
	average	max	min			average	max	min			average	max	min			average	max	min
1	1.8	7.1	-3	0	1	19.8	28	11.5	0	1	28.5	35.2	20.8	0	1	35.5	44.6	26.1	0
2	4.1	10	-2.4	0	2	22.6	30.8	12.2	0	2	28	35.2	20	0	2	36.1	45.5	25.6	0
3	8.2	15.2	0.7	0	3	25.1	33.5	16.6	0	3	27.8	35.8	17.4	0	3	31.5	37.6	23.4	0
4	12.1	22	4	0	4	25	32.9	20.7	0	4	30.2	38.5	20.9	0	4	28	36.2	22.5	0.9
5	14.5	23.7	6.4	0	5	23	30	15.1	0	5	31.3	39.5	22.3	0	5	23.7	30.3	16.5	0
6	12.2	17.7	5.6	0	6	25.6	32.5	17.9	0	6	30.8	36.8	24.3	0	6	28.4	37	19	0
7	7.9	12.6	3.8	0	7	23.5	28.5	18.5	0	7	29.1	37.8	21.2	0	7	30.6	38.5	21.6	0
8	10.2	20	0.4	0	8	20.7	29.6	16.1	0.9	8	19.8	26.7	16.6	5	8	26.9	32.7	21.6	0
9	17.3	27.6	5.4	0	9	18.3	22.9	13.6	4	9	22.2	31.4	11.6	0	9	25.2	32.1	16.2	0
10	21.8	30.3	14.1	0	10	20.8	27.6	11.8	0	10	27.9	35.8	17.1	0	10	26.1	33.1	16.8	0
11	23	32.1	12.7	0	11	22.5	29.2	14.9	0	11	29.5	38.2	19	0	11	26.4	34	17	0
12	21.2	31	13.1	0	12	19	25.6	10.6	0	12	31.2	41	20.5	0	12	29.7	39.6	18.6	0
13	15.2	20.9	9.4	0	13	20.3	25.5	13.1	0.7	13	28.6	36.2	22.5	0	13	33.4	43.7	21.8	0
14	12.8	21	9.3	3	14	23.6	30.9	16.6	0	14	23.8	29.7	18.6	2	14	36.2	45.5	26.6	0
15	9.5	12.5	6.9	0.6	15	20.4	25.9	17.8	4	15	22.7	29.6	14.5	0	15	35.1	43.7	26.1	0
16	9.7	14.1	6.6	0	16	16.9	19.5	14.2	20	16	26.2	33.5	16.4	0	16	34	42.6	26.6	0
17	10.4	14.5	5	2	17	19.3	26.5	12.6	0	17	28.6	36.6	18.6	0	17	34	43.6	24.6	0
18	13.4	21.5	6	0	18	19.5	25.7	14.5	0	18	30.1	38.5	20.2	0	18	31	37.8	25.3	0
19	17	24.5	7.5	0	19	18.9	25.7	11	0	19	31.5	40.2	21.6	0	19	28.4	35	20.6	0
20	19.6	26.7	9.3	0	20	17.5	24.2	12.4	0	20	32.5	40.2	23.4	0	20	28.5	37.2	20.8	0
21	23.3	31.4	15.2	0	21	16.6	22.2	9.1	0	21	31.4	38.5	24.5	0	21	25.5	32.3	17.9	0
22	26.2	34.1	18.4	0.3	22	18.7	24	13.6	0	22	31.5	38.6	25.2	0	22	26.1	33.8	17.9	0
23	23.9	31.7	16	0	23	15.3	21.2	10.1	8	23	29.8	36.4	23.6	0	23	30	38	20	0
24	18.2	24.7	11.8	0	24	18.4	26	9.2	0	24	28.6	36.8	22	0	24	30.9	38.8	21.9	0
25	18.7	26.1	13.8	1	25	22.9	30.6	12.9	0.4	25	29	37	21.6	0	25	28.9	35.9	21.3	0
26	13.6	17.2	11.4	15	26	25.1	31.4	17.9	0	26	29.1	35.1	24.2	0	26	29.6	37	21.1	0
27	14.5	18	11	0.4	27	24.2	31.6	15.6	0	27	30.5	39.3	22.1	0	27	28.9	36.5	23.1	0
28	15.2	23	6.8	0	28	25.5	33	15.6	0	28	34	42.5	26	0	28	27.3	34	20.5	0
29	18.4	25.7	9.2	0	29	27.4	34.5	18.5	0	29	35.6	44.2	26.9	0	29	28.1	34.8	20	0
30	19	26	11.8	0	30	28.1	36.1	19	0	30	35.3	43.1	30.2	0	30	28.2	35	20.6	0
31					31	29.1	35.6	20	0	31					31	29.8	38.2	21.1	0
2016
April					May					June					July
Days	Temperature, °C			Rainfall, mm	Days	Temperature, °C			Rainfall, mm	Days	Temperature, °C			Rainfall, mm	Days	Temperature, °C			Rainfall, mm
	average	max	min			average	max	min			average	max	min			average	max	min
1	7.7	12	6.2	3	1	16.3	24.5	12	0.3	1	28.1	34.4	22.2	0	1	28	35	22.2	0
2	9.6	15.5	2.4	0	2	16.3	23	12	0	2	23.4	31.7	13.5	2	2	26.6	33.6	19.1	0
3	12	18.4	6.9	0	3	16.9	25.2	9	0	3	25.5	32.8	17.2	0	3	27	33.4	20.9	0
4	12	17	8.4	0.7	4	15	22	11	20	4	24.8	34	20.4	8	4	26.1	33.5	18.5	0
5	7.3	13.5	0.4	13	5	17.8	25.4	8.6	0	5	25.6	32.3	18.6	0	5	26.3	32.8	19.1	0
6	8.9	16	3.6	0.6	6	18.3	24.4	14.2	0	6	28.2	36.8	19.5	0	6	28	35.5	20.1	0
7	9.5	16.6	4.2	0	7	22.1	32	11.4	0	7	28.9	38.1	21.5	0.4	7	29.3	37.5	21	0
8	8.9	15.5	3	0	8	21.9	29.2	16.2	0	8	26.4	35	17	0	8	31.2	38.8	20	0
9	7.8	13	2.8	0	9	17.6	22.2	14.4	0	9	30.3	40.1	21.8	0	9	32	40.1	22.7	0
10	9.5	16.5	3.1	0	10	18.5	26.1	9.5	0	10	30.2	37.5	23.8	0	10	33.6	41.8	24.4	0
11	12.4	20.6	4.7	0	11	20.1	27.6	11.2	0	11	28.7	34.5	22.8	0	11	34	42.8	23.8	0
12	15.3	23.5	7.1	0	12	21.6	29.5	12.4	0	12	26.2	32.2	21.4	0	12	33.3	41.9	23.8	0
13	16.8	25.5	7.6	0	13	22.7	30.4	13.6	0	13	24.8	29.5	21	0.5	13	29.7	35.2	24.4	0
14	18.2	27	9.3	0	14	19.2	26.6	13.6	6	14	22.2	26.4	18.6	0.8	14	28.9	35	22.1	0
15	18.4	28	9	0	15	21	29	13	0.3	15	21.6	26.7	18.7	0.8	15	29.6	36.4	22.1	0
16	19.1	28.9	9.2	0	16	20.7	28.1	13.1	0	16	21.2	26.6	17.5	3	16	30.3	38.6	22.2	0
17	18	24.5	12.1	20	17	16.3	20.2	13.2	0	17	25.3	34.9	16.4	0	17	28.4	35.4	20.9	0
18	17	23.2	13	7	18	17.6	25	9.6	0	18	28.4	36.9	19	0	18	27.8	33.6	21.1	0
19	16.9	23.3	11	0	19	19.9	27.1	11	0	19	26	33.5	17.9	0	19	29.5	37.2	22.6	0
20	17.5	25.4	11	0.7	20	22.3	31.4	13.2	0	20	26.9	33.2	19.5	0	20	29.9	37.6	22.3	0
21	16.8	22.2	13.8	2	21	23.7	32.4	14	0	21	23.9	29.8	18.4	0.3	21	29	36.2	22	0
22	19.9	27.4	11.7	0	22	23	31.5	17.1	0	22	25.5	32.8	18.3	0	22	27.2	33.5	20.2	0
23	19.5	30	11.6	0	23	22.2	29.6	14.5	0	23	27.1	34.6	18.4	0	23	28.8	36	20.1	0
24	14.5	21.4	7.6	0	24	24.3	33.1	15	0	24	29.3	37	20	0	24	30	37	23.3	0
25	16.9	25.1	9.2	0	25	24.5	32.8	15	0	25	29.3	38.8	23.4	2	25	29.9	37	23.7	0
26	19.2	29.1	9.2	0	26	25.3	33	17.1	0	26	25.6	33.1	20.2	0	26	30.9	37.4	25.4	0
27	20.2	29.5	11.4	0	27	26.8	34.2	18.4	0	27	23.2	30.4	16	0	27	29	36.4	23.2	0
28	19.3	26.6	13.1	0	28	25.6	34	18.1	0	28	28	36.5	19.8	0	28	24.6	31.1	19.5	0
29	15.4	19.7	11.2	0.4	29	26.2	33.5	17.5	0	29	30.1	39.1	22.1	0	29	24.4	31.7	18.8	0
30	18.7	27	9.6	0	30	27.6	35.2	19.4	0	30	30.8	38.6	22.1	0	30	27.2	35	19	0
					31	28.4	36.5	19.2	0						31	28.8	37	20	0
Среднее	14.7733			27.4		21.2806			26.6		26.5167			17.8		29.0097			0
2017
April					May					June					July
Days	Temperature, °C			Rainfall, mm	Days	Temperature, °C			Rainfall, mm	Days	Temperature, °C			Rainfall, mm	Days	Temperature, °C			Rainfall, mm
	average	max	min			average	max	min			average	max	min			average	max	min
1	3.6	14.6	-2	0	1	17.3	23	11.3	0	1	24.8	32.9	14.8	0	1	32.2	39.9	23.1	0
2	3.6	8.7	0.2	0	2	16	23.2	8.2	0	2	27.4	34.9	17.1	0	2	30	37.7	20.9	0
3	3	8.5	-1.9	0	3	18.9	27.1	10.2	0	3	28.5	34.7	20.4	0.3	3	32	40.3	22.8	0
4	5.8	13.5	-1.4	0	4	21.6	33.2	11.8	0	4	26.1	32	18.6	0	4	34.6	43.4	25.4	0
5	7	10.7	2.6	0	5	25.5	35.1	17.1	0	5	23.7	30.4	15.2	0	5	36.2	43	28.4	0
6	4.5	11.4	-3.2	0	6	22.9	29	17.6	0	6	20.7	26.2	15.1	0.3	6	36.8	45.1	29.7	0
7	8.2	16.3	0.7	0	7	19.1	26.7	9.8	0	7	21.6	29.4	13.4	0	7	33.7	39.8	26.7	0
8	12.3	21.5	2.8	0	8	20.9	28.8	13.8	0	8	25.1	33.5	15.8	0	8	32.9	41.8	24	0
9	14.9	24	5.6	0	9	23	31	17.3	4	9	29.1	38.4	17.5	0	9	31.2	37.3	25.5	0
10	17.7	27.5	8.7	0	10	22.8	30	16.8	0	10	24.6	34.1	18	0	10	28.4	34	21.3	0
11	18.5	23.9	14.4	1	11	24.3	32.5	14.7	0	11	23.3	30.7	14.8	0	11	26.3	31.1	20.3	0
12	16	24.2	7.9	0	12	28.4	37.5	19	0	12	26.3	34.8	17.4	0	12	26.1	32.6	20	0
13	13.9	20.3	10.2	10	13	28.4	39	18.5	0	13	28.9	37.2	19.1	0	13	22.7	26.8	18	0.5
14	15.4	21.5	8.4	0	14	23.6	30.2	18.5	0	14	24.1	31.7	18.4	7	14	22.8	28.7	16	0
15	19	27.4	12.3	0	15	20.1	28	12	0	15	23.4	30.9	16.1	0	15	24.3	30.8	16.3	0
16	17.3	22.2	11.3	0	16	21.3	28.4	14.4	0	16	28.5	37.1	19.2	0	16	26.1	33.4	16.7	0
17	14.8	20.4	8.3	0	17	17.7	25.2	12.5	0	17	31.5	39.8	22.8	0	17	25.9	31.6	17.2	0
18	16.4	23.5	8	0	18	14.6	17.5	11.8	4	18	27.8	34	22.9	0	18	27.9	35.9	18.3	0
19	18.3	26.4	9.3	0	19	18.7	26.2	11.8	0	19	26.8	33	18.8	0	19	28.5	34.6	21.1	0
20	19.9	27.5	11.5	0	20	22.7	30.8	14.2	0	20	28.3	35.5	19.8	0	20	28.7	34.9	19.1	0
21	15.3	23.2	14.3	10	21	24.6	32.8	14.8	0	21	28.8	36.7	19.7	0	21	30.2	37.8	21.8	0
22	16.9	24.2	10	0	22	27.9	37.1	17.1	0	22	29.5	37.1	25.4	0.3	22	31.9	39.2	22.3	0
23	18.4	24.5	14.7	0	23	23.8	34	16	0	23	27.6	34.5	23	0	23	32.6	40.5	23.5	0
24	20.2	30.4	10.8	0	24	25.5	32.8	17.2	0	24	27.6	35.5	19.8	0	24	34.8	42.7	26.6	0
25	23.2	33.3	13	0	25	25.4	32.5	18.3	0	25	29	35.4	20.9	0	25	35.5	43.7	27.3	0
26	21.2	27.8	16	0	26	25.4	32.2	17.7	0	26	28.5	35.8	20.7	0	26	33.1	38.8	25.6	0
27	14.7	19.1	10.2	0	27	26.9	33.3	21.5	0	27	25.4	31.3	18.4	0	27	30.4	36.9	23.7	0
28	13.7	21	7.5	0	28	24	30.5	17	0	28	27.1	35.1	17.8	0	28	30.4	36.6	21.1	0
29	14.5	20.7	8	5	29	25.3	29.9	19.7	0	29	29.9	38	19.9	0	29	29.6	37.1	21.7	0
30	16.3	24.2	7.2	0	30	17.1	26.6	11.4	0	30	31.3	40	23.3	0	30	31.2	38.3	22.5	0
					31	20.7	28.8	11.8	0						31	31.8	38.4	23.5	0
Среднее	14.15			26		22.4			8		26.84			7.9		30.2839			0.5
2018
April					May					June					July
Days	Temperature, °C			Rainfall, mm	Days	Temperature, °C			Rainfall, mm	Days	Temperature, °C			Rainfall, mm	Days	Temperature, °C			Rainfall, mm
	average	max	min			average	max	min			average	max	min			average	max	min
1	3.4	13	-3.4	0	1	15.9	22.3	8.2	0	1	24.4	34.2	13	0	1	29.5	37.2	19.9	0
2	7.4	17.2	-0.8	0	2	19.3	28.4	10.3	0	2	24	30.4	18.3	0	2	29.7	35.5	23.5	0
3	10.8	18.6	3.3	0	3	18.2	25.1	9.6	0	3	15	21.2	7.3	0	3	30.2	38.5	22.1	0
4	13	21.3	6.3	0.3	4	21.8	30.1	11.7	0	4	18.7	28	9.4	0	4	30.7	38.3	21.5	0
5	15.3	26.6	4.9	0	5	22.6	31.7	14.5	0	5	24.1	34.7	13.9	0	5	32.1	40.3	23.7	0
6	12.1	18	7.9	0	6	11.5	19.4	4.6	0	6	28.7	38.7	16.3	0	6	33.1	43	23.3	0
7	9.7	15.7	4.7	0	7	13.1	22.1	3.6	0	7	30.5	36.8	21.9	0	7	34	42.5	24.1	0
8	9.8	18.1	1.5	0	8	17.9	27.4	7.3	0	8	28.9	37.3	21.7	0	8	35.1	43.7	26	0
9	10.5	16.5	5.7	0	9	20.3	28.1	11.3	0	9	23.5	29.9	16.3	0	9	35.4	44.4	25.7	0
10	7.8	15.4	1.4	0	10	22.9	33	13.8	0	10	22	28.6	15.1	0	10	34.7	41.3	30.2	3
11	9.5	18.2	1.4	0	11	25.5	31.4	21.2	0.3	11	24.8	33.7	14.7	0	11	32.7	40.2	24.3	0
12	13.8	25	3.6	0	12	22	26.6	17.2	0	12	26	33.3	17.5	0	12	32.9	40.3	26	0
13	18	29.1	8	0	13	21.6	28.5	13.9	0	13	22.9	28.2	19.4	0	13	32.2	39.6	23	0
14	19.1	28.6	14	0	14	17.8	24.6	9.8	0	14	22	29.1	16.3	0	14	31.7	37.9	24.7	0
15	12.4	18.1	6.7	0	15	19	27.2	8.9	0	15	24	33.9	14	0	15	31	37.8	23.9	0
16	12.3	19.8	4.2	0	16	22.6	30.9	13.9	0	16	27.4	37.2	16.7	0	16	31.2	39.9	22.6	0
17	10.9	15.4	8	0	17	21.3	27.5	13.7	0	17	29.4	39.1	18.9	0	17	31.8	39.1	24.3	0
18	12.8	21.7	3.8	0	18	19	26.7	10.3	0	18	26.8	33.6	18.6	0	18	33	40	24.1	0
19	12.5	21	6	0	19	22.7	30.8	13.8	0	19	23.6	30.6	15.2	0	19	32.1	39.9	24.5	0
20	14.5	21.5	8.4	0	20	24.1	30.9	16.1	0	20	25.8	34.2	16.3	0	20	31.5	38.8	24.1	0
21	17.9	27.6	9.3	0	21	22.3	30.2	12.2	0	21	28.3	36.7	18.9	0	21	32.6	41.9	24	0
22	19.8	23.9	15.8	0.3	22	24.9	35.3	13.5	0	22	29.1	37.9	22.9	0	22	33.4	42.3	27.1	0
23	15.9	20.6	10.9	2	23	21.8	30.1	12.1	0	23	28.2	35.7	21	0	23	25.6	34.3	19.3	0
24	13.1	17.8	10.9	18	24	18.5	25.2	10.1	0	24	27	34.3	19.3	0	24	24.6	32.1	16.4	0
25	11.7	16	8.2	5	25	22	34.2	10.5	0	25	27.5	35.3	19.5	0	25	24.9	31.3	19	0
26	12.3	19.3	4.3	0	26	27.8	40.2	15.1	0	26	26.8	34.5	18.5	0	26	25.9	34.1	17.8	0
27	15.5	24.6	6.9	0	27	19.3	32.6	13.4	0	27	25.1	31.3	18.2	0	27	28.1	35.8	20.3	0
28	20	29.4	10.3	0	28	14.5	22.7	5.4	0	28	25.7	32.7	18.6	0	28	29.3	37.2	21.4	0
29	21.9	30.9	12.8	0	29	18.8	27.8	11.1	0	29	28.4	35.7	19.4	0	29	29.2	37.5	20.6	0
30	17.9	23.9	13.9	0	30	15	22.5	6.9	0	30	31.5	40.9	22.3	0	30	28.4	36	19.1	0
					31	18.9	27.2	10.1	0						31	28.8	38.3	21.1	0
Среднее	13.3867			25.6		20.0935			0.3		25.67			0		30.8194			3
2019
April					May					June					July
Days	Temperature, °C			Rainfall, mm	Days	Temperature, °C			Rainfall, mm	Days	Temperature, °C			Rainfall, mm	Days	Temperature, °C			Rainfall, mm
	average	max	min			average	max	min			average	max	min			average	max	min
1	7.2	15.8	1.7	1	1	8	15.9	2.6	0	1	27.4	35.4	20.7	0.4	1	36.5	45.6	29.4	0
2	10.3	17.1	2.4	0	2	10.1	17.5	3	0	2	26.6	34.2	20.6	0	2	27.2	38.7	19.9	2.6
3	15.9	23	8.9	0	3	11.9	20.8	2.4	0	3	27.8	38.3	21.8	0	3	24.7	33.8	16.4	0
4	15.8	23.6	8.3	0	4	17	25	7.5	0	4	29.4	37.7	21.4	0	4	31.2	39.7	25	0
5	10.1	16.4	4.6	0	5	19.3	29.6	8.9	0	5	28.5	35.6	23.5	0	5	31.6	38.8	23.4	0
6	11.4	17.5	4.5	0	6	21.7	30.9	13.4	0	6	21.4	28	14.7	0	6	30.4	38.5	23	0
7	12.9	20.7	5.8	0	7	22.4	32.5	11.9	0	7	24.1	33.7	14.8	0	7	31	38.8	24.1	0
8	15	23.2	8.3	0	8	23.7	32.2	14.3	0	8	23.4	29	16.6	1	8	30.7	37.5	24.3	0
9	16	25	7.9	0	9	24.6	34.3	15.1	0	9	21	27.4	15.2	0	9	31.9	39.8	22.6	0
10	17.8	27.4	9.3	0	10	25.1	34	15.4	0	10	20.9	28.6	14.1	0	10	32.5	41	23.2	0
11	17.8	24	12.5	0	11	25.6	34.7	15.7	0	11	24.2	32.7	15.8	0	11	34.2	42.5	25.4	0
12	17.5	27.6	8.3	0	12	25.1	33.2	15.9	0	12	27.5	36.5	18.1	0	12	33.7	41.4	25.2	0
13	18.7	28.4	7.9	0	13	24.8	34.2	14.3	0	13	30	39.3	22.7	0	13	33.1	42.5	23.5	0
14	19.9	29.1	10.4	0	14	26.2	33.6	17.5	0	14	30.8	39.3	26.1	0	14	33.7	42.6	23.4	0
15	19.1	25.2	14.4	0	15	25.6	34.8	16.6	0	15	22.6	29.8	16	2	15	34.2	42.8	25.3	0
16	12.7	20.3	8.3	0	16	22.6	29.2	16	0	16	22.6	28.8	15.9	0	16	34.2	44.9	25.7	0
17	13.7	22.2	4.7	0	17	21.4	31.3	14.4	0	17	26.2	35.7	18.2	0	17	33.3	41	25.4	0
18	10.6	17.6	3.1	2	18	24.9	33.7	16	0	18	25.9	32.7	17	0	18	34.2	42	27	0
19	12	15.8	8.1	0.9	19	23.8	30.8	15.2	0	19	26.7	34.5	18.2	0	19	34.5	41.4	26.5	0
20	4.5	8.1	1.2	0	20	23	32.7	17	3.7	20	27.6	36	18.4	0	20	33.9	41.3	26.2	0
21	6.6	11.9	3.1	0	21	21.3	29.1	15.2	3	21	29.6	37.6	20.4	0	21	34.1	41.4	28.6	0
22	9.5	14.4	5.1	1	22	16.6	22.9	10	0	22	29.6	37.3	21.3	0	22	30.7	36.9	24.8	0
23	11.9	19.5	4.4	0	23	18	25	10.3	0	23	29.9	36.8	21.7	0	23	31.5	39.3	24.2	0
24	13	18.6	9	0.1	24	20.7	29.9	12.3	0	24	27.9	36	18.5	0	24	30.4	37.4	22.6	0
25	13.4	20.8	5.8	0	25	22.7	28.8	17.4	0	25	31.6	39.8	21.6	0	25	30.4	37.8	23.4	0
26	14.3	21.8	5.6	0	26	21.8	29.9	14	0	26	33	43.1	23.4	0	26	30.3	36.8	22	0
27	16.8	26.4	9.3	0	27	24.4	34.9	14.1	0	27	32.1	41.4	25.4	0	27	29.8	37.6	21.8	0
28	18.9	27.9	8.7	0	28	28.1	36.1	19.4	0	28	31.6	38.9	25.1	0	28	28.3	36.3	22.6	0
29	19.6	27.2	10.9	0	29	27.4	36.3	17.8	0	29	30.3	39.8	22.1	0	29	29.1	36.3	23.5	0
30	19.2	29.1	12.6	0	30	28.2	33.8	23.5	0	30	33.8	43.4	25.2	0	30	29.7	37.9	21.8	0
					31	27.2	35.8	20.2	0						31	31.7	40.2	24.4	0
Среднее	14.07			5		22.0387			6.7		27.4667			3.4		31.7			2.6
2020
April					May					June					July
Days	Temperature, °C			Rainfall, mm	Days	Temperature, °C			Rainfall, mm	Days	Temperature, °C			Rainfall, mm	Days	Temperature, °C			Rainfall, mm
	average	max	min			average	max	min			average	max	min			average	max	min
1	13.7	18.5	10	3	1	18.7	27.9	9.6	0	1	32.6	41.2	22.7	0	1	29.8	36.8	21.2	0
2	15.3	22.2	8.8	0	2	20	26.7	14.6	0	2	33.8	42	24.9	0	2	19.6	33.2	14.2	2
3	17.1	25.6	7.8	0	3	21.2	29.4	13	0	3	34.7	44.2	25.4	0	3	22	29.5	15	0
4	19.5	26.4	14.6	0	4	20.1	25.9	14.4	0	4	31.8	39	23.1	0	4	25.5	32.6	17.7	0
5	13	20.1	5.2	0	5	18.5	25.4	11.3	0	5	26.7	30.8	20.5	0	5	26.2	32.3	18.4	0
6	14.1	21.4	7.2	0	6	19.8	25.8	12.7	0	6	24.2	30.6	16.8	0	6	26.5	33.3	17.4	0
7	11.1	16.8	6	0	7	20.6	27.8	12.5	0	7	25.1	32.1	17.1	0	7	29.5	37.4	20.9	0
8	5.9	9.4	3.5	0	8	20.3	28	15.2	3	8	26.3	31.7	20.5	0	8	31.1	37.6	23.5	0
9	6	13	-1.8	0.3	9	19.7	24.8	16.1	4	9	26.2	33.6	17.4	0	9	32	38	26.5	0
10	8.2	15	-0.6	0	10	23.6	32.1	14.8	4	10	26.8	34.7	19.9	0	10	31.1	38.2	24	2
11	12.4	21.5	3.7	0	11	25.5	32.6	16.4	0	11	27.8	35.4	20.3	0	11	31.9	38.1	24.1	0
12	13.9	18.1	10.5	2.4	12	24.9	32.5	19.5	0	12	30	38.1	21.4	0	12	31.3	38	24.3	0
13	14.1	19.6	8.3	0	13	18.3	20.2	16.2	2	13	31.2	38.3	21.5	0	13	31.7	39	22.7	0
14	11.1	16.1	5.3	2	14	19.2	26.1	12.8	0.6	14	31.1	38.7	20.9	0	14	33	39.8	24.9	0
15	10.3	18	1	0	15	21.1	28.7	15.2	0.8	15	29.4	37.2	22.9	0	15	31.5	37.2	22.6	0
16	14	21.3	5	0	16	21.6	28.6	14.4	0	16	20.1	27.2	11.8	0	16	31.9	39.1	23.5	0
17	16.2	25.5	5.8	0	17	23.8	32.7	15.9	0	17	23.2	30.4	14.3	0	17	32.7	41	23.5	0
18	20.1	29.6	12.3	0	18	17.9	22.7	15.3	11	18	26	33.2	17	0	18	33.3	41.6	25.6	0
19	21.5	29.7	10.1	0	19	17.8	23.5	11.4	0	19	28.1	36.1	19.1	0	19	33.3	40.7	24.2	0
20	21.7	29	11.3	0	20	19.2	23.7	14.3	0	20	25.4	31.2	18.3	0	20	33.5	40.5	25.6	0
21	22.1	31.6	11.2	0	21	18.9	27.3	10.4	0	21	26	34.8	15.4	0	21	31.7	39.5	24.4	0
22	25.2	34.5	15.6	0	22	25	33.1	16.3	0	22	27.1	35.7	17.5	0	22	32.4	40.4	22.3	0
23	20.9	29.2	14.3	0	23	28	36.3	18	0	23	28.7	37	19.3	0	23	29.4	34.5	27.6	0
24	13.3	22.6	9.5	10	24	30	38.2	19.9	0	24	25.3	32.6	17.4	0	24	28.6	36.9	19.5	0
25	13.5	19.6	8.8	0.3	25	32.1	40.6	22.9	0	25	27.8	36.3	18.2	0	25	31	38.3	22.2	0
26	17.9	28	9	0	26	32.3	40.1	23.4	0	26	25.5	34.5	18.6	4	26	29.6	36.5	23.6	0
27	25.5	36	18.2	0	27	33.2	41.4	23.4	0	27	18.1	25.1	11.3	0	27	29.8	36.9	23	0
28	18.7	22.9	15.3	11	28	29.9	36.3	21.1	0	28	20.9	29.8	12	0	28	28.5	34.9	22.7	0
29	16.1	23	8.9	0	29	27.3	34.7	18.4	0	29	26.4	34	17.9	0	29	26.2	32.1	19.1	0
30	15.9	20.7	10	0	30	29	37.4	19.4	0	30	28.8	36.3	19.7	0	30	26.2	33	18.7	0
					31	30.9	40.2	21.5	0						31	28.6	34.4	23.6	0
Среднее	15.61			29		23.4968			25.4		27.17			4		29.6581			4

## Sheet: Average mean for 3 years
Average mean meteo data from 2013-2020 for three region
KB - Karabalyk Agricultural Experimental Station
	Temperature, °C										Rainfall, mm
Year	May	June	July	August	September	Average	max	min		Year	May	June	July	August	September	Average
2013	14.5	22.1	19.7	18.7	12.2	17.44	22.1	12.2		2013	29.7	18.4	164.1	203.9	28.8	88.98
2014	18.171	23.0407	15.9548	22.4581	11.83	18.2909	23.0407	11.83		2014	51.5	29	153.4	26.4	9.9	54.04
2015	14.7	24.6433	20.2419	16.371	13.4733	17.8859	24.6433	13.4733		2015	72.8	83.8	20.9	27.5	13.4733	43.6947
2016	14.38	18.38	20.29	22.92	12.93	17.78	22.92	12.93		2016	2.5	51	71.5	11	74.4	42.08
2017	13.47	18.71	19.73	20.28	12.62	16.962	20.28	12.62		2017	50.9	79.3	69.7	37.8	7.5	49.04
2018	11.85	16.55	22.1	18.15	13.18	16.366	22.1	11.85		2018	44.5	78.1	36.6	81.8	12	50.6
2019	15.35	18.5	23.12	19.3	10.91	17.436	23.12	10.91		2019	17.1	12.2	24	47.3	50.3	30.18
2020	17.2	17.79	23.29	19.84	11.91	18.006	23.29	11.91		2020	81.6	24.3	18.4	70	42.3	47.32
KA - Karaganda Institute of Agriculture
	Temperature, °C										Rainfall, mm
	May	June	July	August	September	Average	max	min			May	June	July	August	September	Average
2013	11.3613	17.3733	18.6258	17.871	11.67	15.3803	18.6258	11.3613		2013	23.5	11.2	37.6	53.9	5.1	26.26
2014	14	20.0233	17.4774	19.871	17.1175	17.6978	20.0233	14		2014	37	5.1	78	19.3	25.6	33
2015	13.6	19.4	20.3	17.5	10.4	16.24	20.3	10.4		2015	69.1	49	44.2	9.1	20.9	38.46
2016	12.69	17.79	18.89	17.54	14.4	16.262	18.89	12.69		2016	37.5	62.1	125.3	20.9	17.6	52.68
2017	14.04	20.24	20.53	19.8	11.91	17.304	20.53	11.91		2017	17	40	25.9	10.2	23.8	23.38
2018	10.01	18.18	19.96	17.55	10.75	15.29	19.96	10.01		2018	23.2	43.5	26.5	89.4	34.3	43.38
2019	12.43	16.34	22.05	19.8	11.51	16.426	22.05	11.51		2019	9.4	57.9	5.4	22.7	36.6	26.4
2020	16.89	17.88	20.09	18.18	10.69	16.746	20.09	10.69		2020	38.6	66.1	69.7	77.9	30.9	56.64
KO - Kazakh Rice Research Institute
	Temperature, °C										Rainfall, mm
		April	May	June	July	Average	max	min				April	May	June	July	Average
2013		15.17	21.9516	26.65	28.5645	23.084	28.5645	15.17		2013		22.6	4	9.6	0.7	9.225
2014		10.6033	24.1	28.7133	26.2806	22.4243	28.7133	10.6033		2014		24.3	11	0.1	0	8.85
2015		15.1	21.7	29.2	29.7	23.925	29.7	15.1		2015		22	38	7	1	17
2016		14.77	21.28	26.52	29.01	22.895	29.01	14.77		2016		27.4	26.6	17.8	0	17.95
2017		14.15	22.4	26.84	30.28	23.4175	30.28	14.15		2017		26	8	7.9	0.5	10.6
2018		13.39	20.09	25.67	30.82	22.4925	30.82	13.39		2018		25.6	0.3	0	3	7.225
2019		14.07	22.04	27.47	31.7	23.82	31.7	14.07		2019		5	6.7	3.4	2.6	4.425
2020		15.61	23.25	22.17	29.69	22.68	29.69	15.61		2020		29	25.4	4	4	15.6

## Sheet: Two-factorial ANOVA
Results of two-factor ANOVA using meteorological data from 2013-2020 in three studied regions of Kazakhstan (North, Centre, and South)
Temperature	Df	Sum	Sq	Mean	Sq	F-value	Pr(>F)
region	2	204.75	102.38	188.370	8.52e-13	***
year	1	0.03	0.03	0.053	0.821
region:year	2	0.17	0.09	0.160	0.854
Residuals	18	9.78	0.54
Rainfall	Df	Sum	Sq	Mean	Sq	F-value	Pr(>F)
region	2	6427	3214	25.496	5.6e-06	***
year	1	107	107	0.849	0.3689
region:year	2	931	465	3.692	0.0453	*
Residuals	18	2269	126
